# Supplementary material for: Genetic effects on promoter usage are highly context-specific and contribute to complex traits
Source: eLife journal article supplement (doi:10.7554/elife.41673), 2019-01-08
Supplement: supp [file elife-41673-supp-v1.zip]

## Sheet: IFNg + Salmonella study
annotation	trait	condition_name	phenotype_id	snp_id	nsnps	PP.H0.abf	PP.H1.abf	PP.H2.abf	PP.H3.abf	PP.H4.abf	qtl_pval	gwas_pval	qtl_lead	gwas_lead	PP3+PP4	PP4/(PP3+PP4)	summarised_trait	gene_name
Ensembl_87	AD	naive	ENST00000421133	rs12459419	802	2.32973e-12	5.26992e-05	1.10328e-10	0.00149721	0.99845	1.05412e-27	5.12e-08	rs3865444	rs3865444	0.999947	0.998503	AD	CD33
Ensembl_87	AD	naive	ENST00000421133	rs34912427	806	2.32973e-12	5.26992e-05	1.10324e-10	0.00149712	0.99845	1.05412e-27	5.12e-08	rs3865444	rs3865444	0.999947	0.998503	AD	CD33
Ensembl_87	AD	IFNg	ENST00000421133	rs12459419	802	5.22924e-09	6.34105e-05	2.4764e-07	0.00200498	0.997931	7.25664e-20	5.12e-08	rs3865444	rs3865444	0.999936	0.997995	AD	CD33
Ensembl_87	AD	IFNg	ENST00000421133	rs34912427	806	5.22924e-09	6.34105e-05	2.47631e-07	0.00200488	0.997931	7.25664e-20	5.12e-08	rs3865444	rs3865444	0.999936	0.997995	AD	CD33
Ensembl_87	AD	SL1344	ENST00000421133	rs12459419	802	1.43436e-07	0.000124936	6.79265e-06	0.00492159	0.994947	1.09015e-16	5.12e-08	rs34912427	rs3865444	0.999868	0.995078	AD	CD33
Ensembl_87	AD	SL1344	ENST00000421133	rs34912427	806	1.43436e-07	0.000124936	6.79242e-06	0.00492139	0.994947	1.09015e-16	5.12e-08	rs34912427	rs3865444	0.999868	0.995078	AD	CD33
Ensembl_87	AD	IFNg_SL1344	ENST00000421133	rs12459419	802	8.19525e-09	5.90028e-05	3.881e-07	0.00179603	0.998145	2.39533e-19	5.12e-08	rs3865444	rs3865444	0.999941	0.998204	AD	CD33
Ensembl_87	AD	IFNg_SL1344	ENST00000421133	rs34912427	806	8.19526e-09	5.90028e-05	3.88087e-07	0.00179594	0.998145	2.39533e-19	5.12e-08	rs3865444	rs3865444	0.999941	0.998204	AD	CD33
Ensembl_87	CEL	naive	ENST00000409119	rs2227312	129	1.139e-07	5.22719e-07	0.107222	0.491667	0.40111	5.77546e-10	5.423e-12	rs2227312	rs4445406	0.892778	0.449284	CEL	TNFRSF14
Ensembl_87	CEL	naive	ENST00000409119	rs1886730	129	1.139e-07	5.22719e-07	0.107222	0.491667	0.40111	5.77546e-10	5.423e-12	rs2227312	rs4445406	0.892778	0.449284	CEL	TNFRSF14
Ensembl_87	CEL	IFNg	ENST00000409119	rs2227312	129	3.19235e-08	3.34884e-08	0.0300516	0.0305854	0.939363	9.84228e-08	5.423e-12	rs1886730	rs4445406	0.969948	0.968467	CEL	TNFRSF14
Ensembl_87	CEL	IFNg	ENST00000409119	rs1886730	129	3.19235e-08	3.34884e-08	0.0300516	0.0305854	0.939363	9.84228e-08	5.423e-12	rs1886730	rs4445406	0.969948	0.968467	CEL	TNFRSF14
Ensembl_87	CEL	SL1344	ENST00000409119	rs2227312	129	8.92801e-07	1.99041e-08	0.84045	0.0185961	0.140953	0.00394968	5.423e-12	rs2227312	rs4445406	0.159549	0.883446	CEL	TNFRSF14
Ensembl_87	CEL	SL1344	ENST00000409119	rs1886730	129	8.92801e-07	1.99041e-08	0.84045	0.0185961	0.140953	0.00394968	5.423e-12	rs2227312	rs4445406	0.159549	0.883446	CEL	TNFRSF14
Ensembl_87	CEL	IFNg_SL1344	ENST00000409119	rs2227312	129	4.7775e-07	4.00827e-08	0.449736	0.0372193	0.513044	0.000230422	5.423e-12	rs2182176	rs4445406	0.550264	0.932361	CEL	TNFRSF14
Ensembl_87	CEL	IFNg_SL1344	ENST00000409119	rs1886730	129	4.7775e-07	4.00827e-08	0.449736	0.0372193	0.513044	0.000230422	5.423e-12	rs2182176	rs4445406	0.550264	0.932361	CEL	TNFRSF14
Ensembl_87	CEL	naive	ENST00000400377	rs2838530	130	0.00233305	0.00519838	0.0276447	0.0606921	0.904132	1.26794e-10	6.162e-07	rs2070554	rs58911644	0.964824	0.937095	CEL	ICOSLG
Ensembl_87	CEL	naive	ENST00000400377	rs6518352	130	0.00233305	0.00519838	0.0276447	0.0606921	0.904132	1.26794e-10	6.162e-07	rs2070554	rs58911644	0.964824	0.937095	CEL	ICOSLG
Ensembl_87	CEL	IFNg	ENST00000400377	rs2838530	130	1.82383e-05	0.0174945	0.000216108	0.206519	0.775753	5.15508e-16	6.162e-07	rs6518352	rs58911644	0.982271	0.789754	CEL	ICOSLG
Ensembl_87	CEL	IFNg	ENST00000400377	rs6518352	130	1.82383e-05	0.0174945	0.000216108	0.206519	0.775753	5.15508e-16	6.162e-07	rs6518352	rs58911644	0.982271	0.789754	CEL	ICOSLG
Ensembl_87	CEL	SL1344	ENST00000400377	rs2838530	130	3.49476e-08	0.0119267	4.14098e-07	0.140473	0.847599	2.48405e-22	6.162e-07	rs2838530	rs58911644	0.988073	0.857831	CEL	ICOSLG
Ensembl_87	CEL	SL1344	ENST00000400377	rs6518352	130	3.49476e-08	0.0119267	4.14098e-07	0.140473	0.847599	2.48405e-22	6.162e-07	rs2838530	rs58911644	0.988073	0.857831	CEL	ICOSLG
Ensembl_87	CEL	IFNg_SL1344	ENST00000400377	rs2838530	130	2.27319e-07	0.0179461	2.69353e-06	0.211876	0.770175	1.05033e-20	6.162e-07	rs6518352	rs58911644	0.982051	0.784252	CEL	ICOSLG
Ensembl_87	CEL	IFNg_SL1344	ENST00000400377	rs6518352	130	2.27319e-07	0.0179461	2.69353e-06	0.211876	0.770175	1.05033e-20	6.162e-07	rs6518352	rs58911644	0.982051	0.784252	CEL	ICOSLG
Ensembl_87	CEL	naive	ENST00000493678	rs17523802	363	0.0143155	0.00405443	0.297506	0.0836589	0.600465	4.8632e-07	6.207e-07	rs17523802	rs9658012	0.684124	0.877714	CEL	PARK7
Ensembl_87	CEL	IFNg	ENST00000493678	rs17523802	363	0.00161752	0.00166708	0.0336154	0.033716	0.929384	3.92462e-11	6.207e-07	rs17523802	rs9658012	0.9631	0.964992	CEL	PARK7
Ensembl_87	CEL	SL1344	ENST00000493678	rs17523802	363	0.0220749	0.00199552	0.458762	0.0409948	0.476173	1.11942e-05	6.207e-07	rs2493214	rs9658012	0.517168	0.920732	CEL	PARK7
Ensembl_87	CEL	IFNg_SL1344	ENST00000493678	rs17523802	363	0.033365	0.00155006	0.693393	0.0319737	0.239718	0.000283702	6.207e-07	rs17523802	rs9658012	0.271692	0.882316	CEL	PARK7
Ensembl_87	CD	naive	ENST00000419783	rs4955438	493	2.00259e-14	1.4863e-09	1.2625e-06	0.0927941	0.907205	1.36171e-16	4.805e-13	rs12489092	rs13096760	0.999999	0.907206	IBD	GPX1
Ensembl_87	CD	naive	ENST00000419783	rs58627699	495	1.96468e-14	1.50282e-09	1.28173e-06	0.097139	0.90286	1.36171e-16	4.805e-13	rs12489092	rs13096760	0.999999	0.902861	IBD	GPX1
Ensembl_87	CD	IFNg	ENST00000419783	rs4955438	493	1.93595e-12	1.48324e-09	0.000122049	0.0926011	0.907277	3.33923e-13	4.805e-13	rs57105506	rs13096760	0.999878	0.907388	IBD	GPX1
Ensembl_87	CD	IFNg	ENST00000419783	rs58627699	495	1.87834e-12	1.51458e-09	0.00012254	0.0979072	0.90197	3.33923e-13	4.805e-13	rs57105506	rs13096760	0.999877	0.902081	IBD	GPX1
Ensembl_87	CD	SL1344	ENST00000419783	rs4955438	493	4.61976e-11	1.51833e-09	0.00291245	0.0948183	0.902269	2.58168e-10	4.805e-13	rs35904956	rs13096760	0.997088	0.904905	IBD	GPX1
Ensembl_87	CD	SL1344	ENST00000419783	rs58627699	495	4.53071e-11	1.53419e-09	0.00295577	0.0991905	0.897854	2.58168e-10	4.805e-13	rs35904956	rs13096760	0.997044	0.900515	IBD	GPX1
Ensembl_87	CD	IFNg_SL1344	ENST00000419783	rs4955438	493	9.09581e-12	1.50387e-09	0.000573431	0.0939038	0.905523	2.0554e-11	4.805e-13	rs12489092	rs13096760	0.999427	0.906042	IBD	GPX1
Ensembl_87	CD	IFNg_SL1344	ENST00000419783	rs58627699	495	8.84747e-12	1.53116e-09	0.000577197	0.0989901	0.900433	2.0554e-11	4.805e-13	rs12489092	rs13096760	0.999423	0.900953	IBD	GPX1
Ensembl_87	CD	naive	ENST00000235453	rs6682968	458	0.000741356	0.0013948	0.0273466	0.0505304	0.919987	1.06637e-09	2.777e-07	rs6682968	rs1775452	0.970517	0.947935	IBD	DENND1B
Ensembl_87	CD	naive	ENST00000235453	rs6702421	421	0.000567858	0.00138162	0.0308991	0.0742861	0.892865	1.06637e-09	2.777e-07	rs6682968	rs1775452	0.967151	0.923191	IBD	DENND1B
Ensembl_87	CD	naive	ENST00000235453	rs2488401	543	0.000772393	0.00133699	0.0264404	0.0448408	0.926609	1.06637e-09	2.777e-07	rs6682968	rs1775452	0.97145	0.953841	IBD	DENND1B
Ensembl_87	CD	IFNg	ENST00000235453	rs6682968	458	0.000441485	0.00832294	0.0162852	0.306342	0.668608	3.21803e-14	2.777e-07	rs6702421	rs1775452	0.97495	0.685787	IBD	DENND1B
Ensembl_87	CD	IFNg	ENST00000235453	rs6702421	421	0.000356971	0.00681099	0.0194241	0.370007	0.603401	3.21803e-14	2.777e-07	rs6702421	rs1775452	0.973408	0.619885	IBD	DENND1B
Ensembl_87	CD	IFNg	ENST00000235453	rs2488401	543	0.000510878	0.00829827	0.0174882	0.283374	0.690329	3.21803e-14	2.777e-07	rs6702421	rs1775452	0.973703	0.708973	IBD	DENND1B
Ensembl_87	CD	SL1344	ENST00000235453	rs6682968	458	0.0189061	0.00242507	0.697396	0.0892624	0.192011	1.09101e-05	2.777e-07	rs2488401	rs1775452	0.281273	0.682649	IBD	DENND1B
Ensembl_87	CD	SL1344	ENST00000235453	rs6702421	421	0.0128833	0.00170292	0.701025	0.0924701	0.191918	1.09101e-05	2.777e-07	rs2488401	rs1775452	0.284388	0.674846	IBD	DENND1B
Ensembl_87	CD	SL1344	ENST00000235453	rs2488401	543	0.0202595	0.0027275	0.693517	0.0931766	0.190319	1.09101e-05	2.777e-07	rs2488401	rs1775452	0.283496	0.67133	IBD	DENND1B
Ensembl_87	CD	IFNg_SL1344	ENST00000235453	rs6682968	458	0.0039121	0.00398931	0.144307	0.146453	0.701338	6.77381e-10	2.777e-07	rs6682968	rs1775452	0.847792	0.827253	IBD	DENND1B
Ensembl_87	CD	IFNg_SL1344	ENST00000235453	rs6702421	421	0.00290769	0.00318132	0.158218	0.172444	0.66325	6.77381e-10	2.777e-07	rs6682968	rs1775452	0.835693	0.793652	IBD	DENND1B
Ensembl_87	CD	IFNg_SL1344	ENST00000235453	rs2488401	543	0.00418537	0.00394792	0.143272	0.13443	0.714164	6.77381e-10	2.777e-07	rs6682968	rs1775452	0.848594	0.841585	IBD	DENND1B
Ensembl_87	CD	naive	ENST00000441843	rs41288329	796	0.000381908	9.22128e-05	0.428449	0.102982	0.468094	2.45274e-08	6.021e-09	rs41288329	rs1932990	0.571077	0.81967	IBD	LACC1
Ensembl_87	CD	naive	ENST00000441843	rs61959998	795	0.000381958	9.211e-05	0.428504	0.102867	0.468155	2.45274e-08	6.021e-09	rs41288329	rs1932990	0.571022	0.819855	IBD	LACC1
Ensembl_87	CD	naive	ENST00000325686	rs61959998	795	0.000306232	8.4055e-05	0.34355	0.0937359	0.562323	2.69335e-07	6.021e-09	rs41288329	rs1932990	0.656059	0.857123	IBD	LACC1
Ensembl_87	CD	naive	ENST00000325686	rs3764147	799	0.000306158	8.4249e-05	0.343468	0.0939538	0.562188	2.69335e-07	6.021e-09	rs41288329	rs1932990	0.656142	0.856809	IBD	LACC1
Ensembl_87	CD	IFNg	ENST00000441843	rs41288329	796	4.61286e-05	7.2972e-05	0.05175	0.0809976	0.867133	3.26006e-08	6.021e-09	rs137990324	rs1932990	0.948131	0.914571	IBD	LACC1
Ensembl_87	CD	IFNg	ENST00000441843	rs61959998	795	4.6128e-05	7.29823e-05	0.0517493	0.081009	0.867123	3.26006e-08	6.021e-09	rs137990324	rs1932990	0.948132	0.914559	IBD	LACC1
Ensembl_87	CD	IFNg	ENST00000325686	rs61959998	795	2.42464e-05	4.60701e-05	0.0272012	0.0507624	0.921966	6.36338e-08	6.021e-09	rs3764147	rs1932990	0.972729	0.947814	IBD	LACC1
Ensembl_87	CD	IFNg	ENST00000325686	rs3764147	799	2.42463e-05	4.60733e-05	0.0272011	0.050766	0.921963	6.36338e-08	6.021e-09	rs3764147	rs1932990	0.972729	0.947811	IBD	LACC1
Ensembl_87	CD	SL1344	ENST00000441843	rs41288329	796	6.02386e-06	8.85442e-05	0.00675795	0.0984398	0.894708	1.17495e-10	6.021e-09	rs137990324	rs1932990	0.993147	0.900881	IBD	LACC1
Ensembl_87	CD	SL1344	ENST00000441843	rs61959998	795	6.02403e-06	8.85217e-05	0.00675814	0.0984145	0.894733	1.17495e-10	6.021e-09	rs137990324	rs1932990	0.993147	0.900906	IBD	LACC1
Ensembl_87	CD	SL1344	ENST00000325686	rs61959998	795	6.02597e-08	2.5367e-05	6.76032e-05	0.0274859	0.972421	9.63413e-15	6.021e-09	rs137990324	rs1932990	0.999907	0.972512	IBD	LACC1
Ensembl_87	CD	SL1344	ENST00000325686	rs3764147	799	6.02597e-08	2.53671e-05	6.76032e-05	0.0274861	0.972421	9.63413e-15	6.021e-09	rs137990324	rs1932990	0.999907	0.972511	IBD	LACC1
Ensembl_87	CD	IFNg_SL1344	ENST00000441843	rs41288329	796	0.000242357	0.000133593	0.271891	0.149294	0.578439	3.24952e-05	6.021e-09	rs895266	rs1932990	0.727733	0.79485	IBD	LACC1
Ensembl_87	CD	IFNg_SL1344	ENST00000441843	rs61959998	795	0.000242169	0.000134177	0.271681	0.149951	0.577992	3.24952e-05	6.021e-09	rs895266	rs1932990	0.727943	0.794008	IBD	LACC1
Ensembl_87	CD	IFNg_SL1344	ENST00000325686	rs61959998	795	8.87867e-07	3.53629e-05	0.000996065	0.0387121	0.960256	2.24059e-11	6.021e-09	rs3764147	rs1932990	0.998968	0.961248	IBD	LACC1
Ensembl_87	CD	IFNg_SL1344	ENST00000325686	rs3764147	799	8.87865e-07	3.53644e-05	0.000996064	0.0387138	0.960254	2.24059e-11	6.021e-09	rs3764147	rs1932990	0.998968	0.961246	IBD	LACC1
Ensembl_87	CD	naive	ENST00000564831	rs149271	370	1.00521e-15	2.12029e-06	5.02402e-11	0.105077	0.894921	1.91699e-28	4.686e-10	rs149271	rs3020803	0.999998	0.894923	IBD	APOBR
Ensembl_87	CD	IFNg	ENST00000564831	rs149271	370	4.12026e-15	1.75853e-06	2.0593e-10	0.0869782	0.91302	1.16436e-26	4.686e-10	rs149271	rs3020803	0.999998	0.913022	IBD	APOBR
Ensembl_87	CD	SL1344	ENST00000564831	rs149271	370	3.26646e-14	1.92945e-06	1.63257e-09	0.0955291	0.904469	1.3546e-23	4.686e-10	rs149271	rs3020803	0.999998	0.904471	IBD	APOBR
Ensembl_87	CD	IFNg_SL1344	ENST00000564831	rs149271	370	2.1934e-16	2.26416e-06	1.09626e-11	0.112275	0.887723	5.03921e-30	4.686e-10	rs149271	rs3020803	0.999998	0.887725	IBD	APOBR
Ensembl_87	CD	naive	ENST00000343805	rs35540610	1459	0.000356176	6.51915e-05	0.750489	0.137251	0.111839	0.00368339	1.116e-08	rs6735555	rs7423615	0.24909	0.448989	IBD	SP140
Ensembl_87	CD	IFNg	ENST00000343805	rs35540610	1459	5.98336e-05	2.54206e-05	0.126074	0.052742	0.821099	1.17374e-07	1.116e-08	rs35540610	rs7423615	0.873841	0.939644	IBD	SP140
Ensembl_87	CD	SL1344	ENST00000343805	rs35540610	1459	0.000336459	5.08884e-05	0.708943	0.107042	0.183627	0.0013297	1.116e-08	rs7601176	rs7423615	0.290669	0.63174	IBD	SP140
Ensembl_87	CD	IFNg_SL1344	ENST00000343805	rs35540610	1459	0.000279278	4.61993e-05	0.588458	0.0970312	0.314185	0.00119825	1.116e-08	rs6716753	rs7423615	0.411216	0.764039	IBD	SP140
Ensembl_87	CD	naive	ENST00000454079	rs2856236	493	3.9936e-05	0.00596975	0.00102857	0.152913	0.840049	2.33538e-11	1.756e-07	rs34433151	rs7428430	0.992962	0.846003	IBD	RBM6
Ensembl_87	CD	IFNg	ENST00000454079	rs2856236	493	0.000124333	0.00340196	0.00320223	0.0867122	0.906559	1.14557e-09	1.756e-07	rs2856236	rs7428430	0.993271	0.9127	IBD	RBM6
Ensembl_87	CD	SL1344	ENST00000454079	rs2856236	493	0.0168495	0.00373326	0.433964	0.0957017	0.449752	7.57148e-05	1.756e-07	rs11130227	rs7428430	0.545454	0.824547	IBD	RBM6
Ensembl_87	CD	IFNg_SL1344	ENST00000454079	rs2856236	493	0.01036	0.00252658	0.266827	0.0644171	0.65587	8.11518e-06	1.756e-07	rs111439884	rs7428430	0.720287	0.910567	IBD	RBM6
Ensembl_87	CD	naive	ENST00000302631	rs61012301	422	4.35694e-06	5.58062e-05	0.00845303	0.107387	0.8841	4.59962e-11	6.098e-09	rs61012301	rs7543234	0.991487	0.891691	IBD	SCAMP3
Ensembl_87	CD	naive	ENST00000492887	rs2297480	369	7.87198e-08	9.59134e-05	0.000155279	0.188383	0.811366	5.40359e-16	6.098e-09	rs11264369	rs7543234	0.999749	0.81157	IBD	FDPS
Ensembl_87	CD	naive	ENST00000302631	rs2242577	421	4.36989e-06	5.55595e-05	0.00842133	0.106185	0.885334	4.59962e-11	6.098e-09	rs61012301	rs7543234	0.991519	0.892907	IBD	SCAMP3
Ensembl_87	CD	naive	ENST00000492887	rs7534795	374	7.93193e-08	9.41436e-05	0.000156231	0.184615	0.815135	5.40359e-16	6.098e-09	rs11264369	rs7543234	0.99975	0.815339	IBD	FDPS
Ensembl_87	CD	naive	ENST00000302631	rs34927848	413	4.33298e-06	5.62962e-05	0.00850439	0.109611	0.881824	4.59962e-11	6.098e-09	rs61012301	rs7543234	0.991435	0.889442	IBD	SCAMP3
Ensembl_87	CD	naive	ENST00000492887	rs12732972	410	8.09131e-08	9.15859e-05	0.000158808	0.178935	0.820815	5.40359e-16	6.098e-09	rs11264369	rs7543234	0.99975	0.82102	IBD	FDPS
Ensembl_87	CD	IFNg	ENST00000302631	rs61012301	422	8.4178e-07	6.33061e-05	0.00163316	0.121946	0.876357	7.02966e-13	6.098e-09	rs2072647	rs7543234	0.998303	0.877847	IBD	SCAMP3
Ensembl_87	CD	IFNg	ENST00000492887	rs2297480	369	1.68208e-07	5.7732e-05	0.000331799	0.112993	0.886618	1.32484e-13	6.098e-09	rs2297480	rs7543234	0.99961	0.886963	IBD	FDPS
Ensembl_87	CD	IFNg	ENST00000302631	rs2242577	421	8.4337e-07	6.32398e-05	0.00162528	0.120994	0.877317	7.02966e-13	6.098e-09	rs2072647	rs7543234	0.998311	0.878801	IBD	SCAMP3
Ensembl_87	CD	IFNg	ENST00000492887	rs7534795	374	1.68366e-07	5.75254e-05	0.000331621	0.112418	0.887193	1.32484e-13	6.098e-09	rs2297480	rs7543234	0.999611	0.887539	IBD	FDPS
Ensembl_87	CD	IFNg	ENST00000302631	rs34927848	413	8.38957e-07	6.34863e-05	0.00164663	0.123731	0.874558	7.02966e-13	6.098e-09	rs2072647	rs7543234	0.998289	0.876057	IBD	SCAMP3
Ensembl_87	CD	IFNg	ENST00000492887	rs12732972	410	1.69452e-07	5.65384e-05	0.000332585	0.110078	0.889532	1.32484e-13	6.098e-09	rs2297480	rs7543234	0.999611	0.889879	IBD	FDPS
Ensembl_87	CD	SL1344	ENST00000302631	rs61012301	422	2.99974e-06	4.96232e-05	0.00581989	0.0953765	0.898751	3.74717e-11	6.098e-09	rs34927848	rs7543234	0.994127	0.90406	IBD	SCAMP3
Ensembl_87	CD	SL1344	ENST00000492887	rs2297480	369	2.74455e-07	5.50219e-05	0.000541377	0.107642	0.891762	4.65183e-14	6.098e-09	rs7534795	rs7543234	0.999403	0.892294	IBD	FDPS
Ensembl_87	CD	SL1344	ENST00000302631	rs2242577	421	3.00639e-06	4.94622e-05	0.00579368	0.0944202	0.899734	3.74717e-11	6.098e-09	rs34927848	rs7543234	0.994154	0.905025	IBD	SCAMP3
Ensembl_87	CD	SL1344	ENST00000492887	rs7534795	374	2.74937e-07	5.45775e-05	0.000541529	0.106606	0.892798	4.65183e-14	6.098e-09	rs7534795	rs7543234	0.999404	0.893331	IBD	FDPS
Ensembl_87	CD	SL1344	ENST00000302631	rs34927848	413	2.98786e-06	4.99607e-05	0.00586431	0.0971616	0.896921	3.74717e-11	6.098e-09	rs34927848	rs7543234	0.994083	0.90226	IBD	SCAMP3
Ensembl_87	CD	SL1344	ENST00000492887	rs12732972	410	2.75902e-07	5.38887e-05	0.000541513	0.104873	0.894531	4.65183e-14	6.098e-09	rs7534795	rs7543234	0.999404	0.895065	IBD	FDPS
Ensembl_87	CD	IFNg_SL1344	ENST00000302631	rs61012301	422	0.000256099	4.96008e-05	0.496866	0.0958249	0.407004	4.89321e-06	6.098e-09	rs7417746	rs7543234	0.502829	0.809428	IBD	SCAMP3
Ensembl_87	CD	IFNg_SL1344	ENST00000492887	rs2297480	369	3.21138e-05	4.64022e-05	0.063346	0.0906848	0.845891	7.63618e-08	6.098e-09	rs12732972	rs7543234	0.936575	0.903174	IBD	FDPS
Ensembl_87	CD	IFNg_SL1344	ENST00000302631	rs2242577	421	0.000257981	4.93017e-05	0.497163	0.0946027	0.407927	4.89321e-06	6.098e-09	rs7417746	rs7543234	0.50253	0.811747	IBD	SCAMP3
Ensembl_87	CD	IFNg_SL1344	ENST00000492887	rs7534795	374	3.2129e-05	4.63533e-05	0.0632827	0.0904533	0.846185	7.63618e-08	6.098e-09	rs12732972	rs7543234	0.936639	0.903428	IBD	FDPS
Ensembl_87	CD	IFNg_SL1344	ENST00000302631	rs34927848	413	0.000252954	4.96383e-05	0.496475	0.0970194	0.406203	4.89321e-06	6.098e-09	rs7417746	rs7543234	0.503223	0.807204	IBD	SCAMP3
Ensembl_87	CD	IFNg_SL1344	ENST00000492887	rs12732972	410	3.21769e-05	4.62787e-05	0.0631537	0.0899845	0.846783	7.63618e-08	6.098e-09	rs12732972	rs7543234	0.936768	0.903942	IBD	FDPS
Ensembl_87	CD	naive	ENST00000497907	rs3820594	425	0.00247613	0.00011139	0.871713	0.0391277	0.0865717	0.0269709	6.81e-08	rs34673835	rs821551	0.125699	0.68872	IBD	ARHGEF2
Ensembl_87	CD	IFNg	ENST00000497907	rs3820594	425	0.0024892	0.000103953	0.876314	0.0365115	0.0845816	0.0399114	6.81e-08	rs34444588	rs821551	0.121093	0.698484	IBD	ARHGEF2
Ensembl_87	CD	SL1344	ENST00000497907	rs3820594	425	0.000259022	0.000312943	0.0911875	0.109371	0.798869	9.83853e-07	6.81e-08	rs28662267	rs821551	0.90824	0.879579	IBD	ARHGEF2
Ensembl_87	CD	IFNg_SL1344	ENST00000497907	rs3820594	425	9.29018e-07	0.000195059	0.000327057	0.0677379	0.931739	1.45264e-13	6.81e-08	rs2297649	rs821551	0.999477	0.932227	IBD	ARHGEF2
Ensembl_87	IBD	naive	ENST00000564831	rs149271	370	4.23878e-16	8.94089e-07	2.86533e-11	0.0594982	0.940501	1.91699e-28	2.783e-10	rs149271	rs12446550	0.999999	0.940502	IBD	APOBR
Ensembl_87	IBD	IFNg	ENST00000564831	rs149271	370	1.68496e-15	7.19144e-07	1.139e-10	0.0476604	0.952339	1.16436e-26	2.783e-10	rs149271	rs12446550	0.999999	0.95234	IBD	APOBR
Ensembl_87	IBD	SL1344	ENST00000564831	rs149271	370	1.33474e-14	7.88407e-07	9.02256e-10	0.0523472	0.947652	1.3546e-23	2.783e-10	rs149271	rs12446550	0.999999	0.947653	IBD	APOBR
Ensembl_87	IBD	IFNg_SL1344	ENST00000564831	rs149271	370	9.56971e-17	9.87846e-07	6.46894e-12	0.0658423	0.934157	5.03921e-30	2.783e-10	rs149271	rs12446550	0.999999	0.934158	IBD	APOBR
Ensembl_87	IBD	naive	ENST00000450947	rs11591780	681	1.57655e-05	0.0032871	0.000428982	0.0885344	0.907734	7.86568e-12	9.37e-07	rs12771867	rs12572775	0.996268	0.911134	IBD	MFSD13A
Ensembl_87	IBD	naive	ENST00000487599	rs11598884	688	0.026705	0.00545228	0.727113	0.14836	0.0923698	1.05456e-06	9.37e-07	rs7075281	rs12572775	0.24073	0.383707	IBD	ACTR1A
Ensembl_87	IBD	IFNg	ENST00000450947	rs11591780	681	0.000260765	0.0064609	0.00709543	0.17499	0.811193	2.29833e-10	9.37e-07	rs11591780	rs12572775	0.986183	0.822558	IBD	MFSD13A
Ensembl_87	IBD	IFNg	ENST00000487599	rs11598884	688	0.0229415	0.00425333	0.624642	0.115575	0.232588	9.2242e-06	9.37e-07	rs72845807	rs12572775	0.348163	0.668043	IBD	ACTR1A
Ensembl_87	IBD	SL1344	ENST00000450947	rs11591780	681	0.0203031	0.00308342	0.552448	0.0835595	0.340606	0.000470352	9.37e-07	rs11593710	rs12572775	0.424165	0.803002	IBD	MFSD13A
Ensembl_87	IBD	SL1344	ENST00000487599	rs11598884	688	0.000197984	0.00314514	0.00539062	0.0847281	0.906538	1.56174e-10	9.37e-07	rs11598884	rs12572775	0.991266	0.914525	IBD	ACTR1A
Ensembl_87	IBD	IFNg_SL1344	ENST00000450947	rs11591780	681	0.0294831	0.00222407	0.802238	0.0604114	0.105644	0.00482394	9.37e-07	rs11191355	rs12572775	0.166055	0.636197	IBD	MFSD13A
Ensembl_87	IBD	IFNg_SL1344	ENST00000487599	rs11598884	688	0.0195646	0.00293687	0.532696	0.0795986	0.365204	9.32901e-05	9.37e-07	rs2296580	rs12572775	0.444803	0.821048	IBD	ACTR1A
Ensembl_87	IBD	naive	ENST00000409119	rs2227312	674	1.44644e-05	0.000214888	0.00423165	0.0619332	0.933606	5.77546e-10	3.084e-08	rs2227312	rs1886731	0.995539	0.937789	IBD	TNFRSF14
Ensembl_87	IBD	naive	ENST00000409119	rs1886730	672	1.44644e-05	0.00021488	0.00423166	0.0619308	0.933608	5.77546e-10	3.084e-08	rs2227312	rs1886731	0.995539	0.937792	IBD	TNFRSF14
Ensembl_87	IBD	IFNg	ENST00000409119	rs2227312	674	0.000132591	0.000395807	0.0387903	0.11495	0.845731	9.84228e-08	3.084e-08	rs1886730	rs1886731	0.960681	0.880345	IBD	TNFRSF14
Ensembl_87	IBD	IFNg	ENST00000409119	rs1886730	672	0.000132593	0.000395767	0.0387908	0.114938	0.845743	9.84228e-08	3.084e-08	rs1886730	rs1886731	0.960681	0.880358	IBD	TNFRSF14
Ensembl_87	IBD	SL1344	ENST00000409119	rs2227312	674	0.00231586	0.000215162	0.677518	0.0626897	0.257261	0.00394968	3.084e-08	rs2227312	rs1886731	0.319951	0.804065	IBD	TNFRSF14
Ensembl_87	IBD	SL1344	ENST00000409119	rs1886730	672	0.00231611	0.000214821	0.67759	0.0625898	0.257289	0.00394968	3.084e-08	rs2227312	rs1886731	0.319879	0.804333	IBD	TNFRSF14
Ensembl_87	IBD	IFNg_SL1344	ENST00000409119	rs2227312	674	0.00137817	0.000384682	0.403193	0.112058	0.482986	0.000230422	3.084e-08	rs2182176	rs1886731	0.595044	0.811681	IBD	TNFRSF14
Ensembl_87	IBD	IFNg_SL1344	ENST00000409119	rs1886730	672	0.00137828	0.000384453	0.403224	0.111991	0.483023	0.000230422	3.084e-08	rs2182176	rs1886731	0.595014	0.811785	IBD	TNFRSF14
Ensembl_87	IBD	naive	ENST00000505837	rs12651329	986	0.0049972	0.000452135	0.85233	0.0770516	0.0651693	0.000564652	4.121e-08	rs13122997	rs6826501	0.142221	0.458226	IBD	ARAP2
Ensembl_87	IBD	IFNg	ENST00000505837	rs12651329	986	0.000989681	0.00032387	0.168802	0.0544643	0.775421	5.84914e-06	4.121e-08	rs12651329	rs6826501	0.829885	0.934371	IBD	ARAP2
Ensembl_87	IBD	SL1344	ENST00000505837	rs12651329	986	0.0049575	0.000472653	0.845558	0.0805479	0.0684636	0.0127712	4.121e-08	rs28408136	rs6826501	0.149011	0.459452	IBD	ARAP2
Ensembl_87	IBD	IFNg_SL1344	ENST00000505837	rs12651329	986	0.00469303	0.000714423	0.80045	0.121781	0.0723622	0.0022371	4.121e-08	rs28475773	rs6826501	0.194143	0.372726	IBD	ARAP2
Ensembl_87	IBD	naive	ENST00000302631	rs61012301	422	0.000170457	0.00218331	0.00866406	0.110095	0.878887	4.59962e-11	6.915e-07	rs61012301	rs734073	0.988982	0.888678	IBD	SCAMP3
Ensembl_87	IBD	naive	ENST00000612778	rs12743084	460	0.00729286	0.00263034	0.367308	0.131987	0.490782	1.10317e-06	6.915e-07	rs12743084	rs734073	0.622769	0.788064	IBD	MUC1
Ensembl_87	IBD	naive	ENST00000611577	rs4072037	463	0.00804569	0.00194048	0.405889	0.0974069	0.486718	1.11979e-05	6.915e-07	rs2990220	rs734073	0.584125	0.833243	IBD	MUC1
Ensembl_87	IBD	naive	ENST00000302631	rs2242577	421	0.000170667	0.00216989	0.008664	0.109276	0.87972	4.59962e-11	6.915e-07	rs61012301	rs734073	0.988995	0.889508	IBD	SCAMP3
Ensembl_87	IBD	naive	ENST00000302631	rs34927848	413	0.000170955	0.00222113	0.00832618	0.107296	0.881986	4.59962e-11	6.915e-07	rs61012301	rs734073	0.989282	0.891542	IBD	SCAMP3
Ensembl_87	IBD	naive	ENST00000355379	rs7417746	425	0.000277495	0.00151447	0.0140805	0.0759381	0.908189	1.55759e-10	6.915e-07	rs34278239	rs734073	0.984128	0.922837	IBD	SCAMP3
Ensembl_87	IBD	IFNg	ENST00000302631	rs61012301	422	1.93795e-05	0.00145744	0.000985031	0.073155	0.924383	7.02966e-13	6.915e-07	rs2072647	rs734073	0.997538	0.926664	IBD	SCAMP3
Ensembl_87	IBD	IFNg	ENST00000612778	rs12743084	460	1.57874e-06	0.00171613	7.95137e-05	0.0855206	0.912682	9.67074e-15	6.915e-07	rs4072037	rs734073	0.998203	0.914325	IBD	MUC1
Ensembl_87	IBD	IFNg	ENST00000611577	rs4072037	463	2.54038e-08	0.00128553	1.28157e-06	0.0639177	0.934795	4.09498e-19	6.915e-07	rs4072037	rs734073	0.998713	0.936	IBD	MUC1
Ensembl_87	IBD	IFNg	ENST00000302631	rs2242577	421	1.93869e-05	0.00145372	0.000984183	0.0728739	0.924669	7.02966e-13	6.915e-07	rs2072647	rs734073	0.997543	0.926947	IBD	SCAMP3
Ensembl_87	IBD	IFNg	ENST00000302631	rs34927848	413	1.94295e-05	0.00147029	0.000946295	0.070682	0.926882	7.02966e-13	6.915e-07	rs2072647	rs734073	0.997564	0.929145	IBD	SCAMP3
Ensembl_87	IBD	IFNg	ENST00000355379	rs7417746	425	0.000226646	0.00210219	0.0115003	0.105788	0.880383	3.72116e-10	6.915e-07	rs2072647	rs734073	0.986171	0.892729	IBD	SCAMP3
Ensembl_87	IBD	SL1344	ENST00000302631	rs61012301	422	0.000162431	0.00268701	0.00825613	0.135724	0.853171	3.74717e-11	6.915e-07	rs34927848	rs734073	0.988894	0.862752	IBD	SCAMP3
Ensembl_87	IBD	SL1344	ENST00000612778	rs12743084	460	4.2682e-06	0.0012154	0.000214969	0.060276	0.938289	1.67898e-14	6.915e-07	rs4072037	rs734073	0.998565	0.939637	IBD	MUC1
Ensembl_87	IBD	SL1344	ENST00000611577	rs4072037	463	2.41987e-07	0.00131561	1.22078e-05	0.0654368	0.933235	3.82918e-17	6.915e-07	rs4072037	rs734073	0.998672	0.934476	IBD	MUC1
Ensembl_87	IBD	SL1344	ENST00000302631	rs2242577	421	0.00016262	0.00267549	0.0082555	0.134969	0.853938	3.74717e-11	6.915e-07	rs34927848	rs734073	0.988906	0.863517	IBD	SCAMP3
Ensembl_87	IBD	SL1344	ENST00000302631	rs34927848	413	0.000163144	0.00272797	0.00794576	0.132006	0.857157	3.74717e-11	6.915e-07	rs34927848	rs734073	0.989163	0.866548	IBD	SCAMP3
Ensembl_87	IBD	SL1344	ENST00000355379	rs7417746	425	0.00106475	0.00245276	0.0540267	0.123638	0.818818	2.24633e-08	6.915e-07	rs138507724	rs734073	0.942456	0.868813	IBD	SCAMP3
Ensembl_87	IBD	IFNg_SL1344	ENST00000302631	rs61012301	422	0.00917927	0.00177782	0.466569	0.0899316	0.432542	4.89321e-06	6.915e-07	rs7417746	rs734073	0.522474	0.827873	IBD	SCAMP3
Ensembl_87	IBD	IFNg_SL1344	ENST00000612778	rs12743084	460	5.61009e-06	0.00180283	0.000282554	0.089892	0.908017	2.21844e-13	6.915e-07	rs4072037	rs734073	0.997909	0.90992	IBD	MUC1
Ensembl_87	IBD	IFNg_SL1344	ENST00000611577	rs4072037	463	3.41643e-09	0.00117244	1.72352e-07	0.0582067	0.940621	5.60934e-21	6.915e-07	rs4072037	rs734073	0.998827	0.941725	IBD	MUC1
Ensembl_87	IBD	IFNg_SL1344	ENST00000302631	rs2242577	421	0.00920082	0.00175833	0.467084	0.0888293	0.433128	4.89321e-06	6.915e-07	rs7417746	rs734073	0.521957	0.829815	IBD	SCAMP3
Ensembl_87	IBD	IFNg_SL1344	ENST00000302631	rs34927848	413	0.00939233	0.0018431	0.457443	0.0893243	0.441997	4.89321e-06	6.915e-07	rs7417746	rs734073	0.531321	0.831883	IBD	SCAMP3
Ensembl_87	IBD	IFNg_SL1344	ENST00000355379	rs7417746	425	0.00681272	0.0017005	0.345687	0.0857255	0.560075	1.38228e-06	6.915e-07	rs7417746	rs734073	0.6458	0.867257	IBD	SCAMP3
Ensembl_87	IBD	naive	ENST00000568930	rs9924714	691	1.34566e-05	6.0842e-06	0.164255	0.0735029	0.762223	4.91373e-07	1.715e-09	rs9924714	rs9934775	0.835726	0.912049	IBD	ADCY7
Ensembl_87	IBD	naive	ENST00000568930	rs56070459	627	1.3474e-05	5.98643e-06	0.164467	0.072309	0.763204	4.91373e-07	1.715e-09	rs9924714	rs9934775	0.835513	0.913456	IBD	ADCY7
Ensembl_87	IBD	IFNg	ENST00000568930	rs9924714	691	3.16677e-05	1.12755e-05	0.386542	0.137155	0.47626	3.12416e-07	1.715e-09	rs56070459	rs9934775	0.613415	0.776408	IBD	ADCY7
Ensembl_87	IBD	IFNg	ENST00000568930	rs56070459	627	3.17376e-05	1.1119e-05	0.387399	0.135245	0.477313	3.12416e-07	1.715e-09	rs56070459	rs9934775	0.612558	0.779213	IBD	ADCY7
Ensembl_87	IBD	SL1344	ENST00000568930	rs9924714	691	6.93372e-05	5.35429e-06	0.846345	0.0652672	0.0883132	0.00169715	1.715e-09	rs9924714	rs9934775	0.15358	0.575029	IBD	ADCY7
Ensembl_87	IBD	SL1344	ENST00000568930	rs56070459	627	6.96338e-05	5.02624e-06	0.849971	0.0612632	0.0886914	0.00169715	1.715e-09	rs9924714	rs9934775	0.149955	0.591455	IBD	ADCY7
Ensembl_87	IBD	IFNg_SL1344	ENST00000568930	rs9924714	691	6.87372e-05	4.98302e-06	0.83902	0.0607236	0.100183	0.000599978	1.715e-09	rs8061695	rs9934775	0.160906	0.622615	IBD	ADCY7
Ensembl_87	IBD	IFNg_SL1344	ENST00000568930	rs56070459	627	6.90895e-05	4.588e-06	0.843328	0.0559018	0.100697	0.000599978	1.715e-09	rs8061695	rs9934775	0.156598	0.643024	IBD	ADCY7
Ensembl_87	UC	naive	ENST00000450947	rs11591780	681	2.00885e-05	0.00418842	0.000365033	0.0751886	0.920238	7.86568e-12	9.996e-07	rs12771867	rs11591780	0.995426	0.924466	IBD	MFSD13A
Ensembl_87	UC	naive	ENST00000487599	rs11598884	688	0.0388339	0.0079286	0.705765	0.14399	0.103483	1.05456e-06	9.996e-07	rs7075281	rs11591780	0.247473	0.418157	IBD	ACTR1A
Ensembl_87	UC	IFNg	ENST00000450947	rs11591780	681	0.000236218	0.0058527	0.00429237	0.105467	0.884152	2.29833e-10	9.996e-07	rs11591780	rs11591780	0.989619	0.893427	IBD	MFSD13A
Ensembl_87	UC	IFNg	ENST00000487599	rs11598884	688	0.0323386	0.00599555	0.58772	0.108697	0.265249	9.2242e-06	9.996e-07	rs72845807	rs11591780	0.373946	0.709323	IBD	ACTR1A
Ensembl_87	UC	SL1344	ENST00000450947	rs11591780	681	0.0296325	0.00450028	0.538459	0.0814296	0.345978	0.000470352	9.996e-07	rs11593710	rs11591780	0.427408	0.80948	IBD	MFSD13A
Ensembl_87	UC	SL1344	ENST00000487599	rs11598884	688	0.000244758	0.00388818	0.00444821	0.0697419	0.921677	1.56174e-10	9.996e-07	rs11598884	rs11591780	0.991419	0.929654	IBD	ACTR1A
Ensembl_87	UC	IFNg_SL1344	ENST00000450947	rs11591780	681	0.0430678	0.00324883	0.782596	0.0589232	0.112164	0.00482394	9.996e-07	rs11191355	rs11591780	0.171088	0.655596	IBD	MFSD13A
Ensembl_87	UC	IFNg_SL1344	ENST00000487599	rs11598884	688	0.0257008	0.00385799	0.467085	0.0696811	0.433675	9.32901e-05	9.996e-07	rs2296580	rs11591780	0.503356	0.861567	IBD	ACTR1A
Ensembl_87	UC	naive	ENST00000409119	rs2227312	674	8.68127e-08	1.28972e-06	0.00373959	0.054615	0.941644	5.77546e-10	2.254e-10	rs2227312	rs1886731	0.996259	0.94518	IBD	TNFRSF14
Ensembl_87	UC	naive	ENST00000409119	rs1886730	672	8.68129e-08	1.28967e-06	0.0037396	0.0546128	0.941646	5.77546e-10	2.254e-10	rs2227312	rs1886731	0.996259	0.945182	IBD	TNFRSF14
Ensembl_87	UC	IFNg	ENST00000409119	rs2227312	674	9.25617e-07	2.76313e-06	0.0398723	0.118184	0.84194	9.84228e-08	2.254e-10	rs1886730	rs1886731	0.960124	0.876908	IBD	TNFRSF14
Ensembl_87	UC	IFNg	ENST00000409119	rs1886730	672	9.2563e-07	2.76285e-06	0.0398729	0.118172	0.841952	9.84228e-08	2.254e-10	rs1886730	rs1886731	0.960123	0.87692	IBD	TNFRSF14
Ensembl_87	UC	SL1344	ENST00000409119	rs2227312	674	1.57766e-05	1.46578e-06	0.679603	0.0628832	0.257497	0.00394968	2.254e-10	rs2227312	rs1886731	0.32038	0.803723	IBD	TNFRSF14
Ensembl_87	UC	SL1344	ENST00000409119	rs1886730	672	1.57783e-05	1.46345e-06	0.679675	0.0627829	0.257524	0.00394968	2.254e-10	rs2227312	rs1886731	0.320307	0.803992	IBD	TNFRSF14
Ensembl_87	UC	IFNg_SL1344	ENST00000409119	rs2227312	674	9.31169e-06	2.59912e-06	0.401115	0.111474	0.4874	0.000230422	2.254e-10	rs2182176	rs1886731	0.598873	0.813861	IBD	TNFRSF14
Ensembl_87	UC	IFNg_SL1344	ENST00000409119	rs1886730	672	9.31239e-06	2.59757e-06	0.401145	0.111407	0.487436	0.000230422	2.254e-10	rs2182176	rs1886731	0.598843	0.813964	IBD	TNFRSF14
Ensembl_87	UC	naive	ENST00000313050	rs1051957	764	7.66394e-09	2.96423e-09	0.18642	0.0713604	0.74222	1.58163e-07	2.894e-13	rs1051957	rs3829111	0.81358	0.912288	IBD	SEC16A
Ensembl_87	UC	IFNg	ENST00000313050	rs1051957	764	2.3422e-08	3.18479e-09	0.569723	0.0771145	0.353163	0.000204897	2.894e-13	rs11387728	rs3829111	0.430277	0.820779	IBD	SEC16A
Ensembl_87	UC	SL1344	ENST00000313050	rs1051957	764	2.92381e-08	2.69735e-09	0.711195	0.0653877	0.223417	0.00129925	2.894e-13	rs13300907	rs3829111	0.288805	0.773592	IBD	SEC16A
Ensembl_87	UC	IFNg_SL1344	ENST00000313050	rs1051957	764	3.59991e-08	2.45906e-09	0.875652	0.0597503	0.0645978	0.036112	2.894e-13	rs9632944	rs3829111	0.124348	0.519491	IBD	SEC16A
Ensembl_87	UC	naive	ENST00000505837	rs12651329	986	0.0591293	0.00534988	0.802053	0.072507	0.0609605	0.000564652	7.407e-07	rs13122997	rs7688524	0.133467	0.456744	IBD	ARAP2
Ensembl_87	UC	IFNg	ENST00000505837	rs12651329	986	0.00944162	0.00308974	0.12807	0.0410922	0.818306	5.84914e-06	7.407e-07	rs12651329	rs7688524	0.859399	0.952185	IBD	ARAP2
Ensembl_87	UC	SL1344	ENST00000505837	rs12651329	986	0.0586469	0.00559146	0.795511	0.0757803	0.0644706	0.0127712	7.407e-07	rs28408136	rs7688524	0.140251	0.459681	IBD	ARAP2
Ensembl_87	UC	IFNg_SL1344	ENST00000505837	rs12651329	986	0.0555516	0.00845666	0.753524	0.114642	0.0678255	0.0022371	7.407e-07	rs28475773	rs7688524	0.182467	0.371713	IBD	ARAP2
Ensembl_87	RA	naive	ENST00000510546	rs267962	988	8.79807e-05	0.00504052	0.0018598	0.105663	0.887349	6.31888e-13	9.3e-07	rs267962	rs267949	0.993012	0.893594	RA	DAP
Ensembl_87	RA	naive	ENST00000510546	5_10756068	1043	8.79793e-05	0.00504089	0.00185986	0.105676	0.887335	6.31888e-13	9.3e-07	rs267962	rs267949	0.993011	0.89358	RA	DAP
Ensembl_87	RA	naive	ENST00000510546	rs56954614	993	8.79806e-05	0.00504056	0.00185981	0.105664	0.887348	6.31888e-13	9.3e-07	rs267962	rs267949	0.993012	0.893592	RA	DAP
Ensembl_87	RA	IFNg	ENST00000510546	rs267962	988	0.00298495	0.00385545	0.0630979	0.0806497	0.849412	4.63313e-08	9.3e-07	5_10756068	rs267949	0.930062	0.913286	RA	DAP
Ensembl_87	RA	IFNg	ENST00000510546	5_10756068	1043	0.00298383	0.00387053	0.0630776	0.0809731	0.849095	4.63313e-08	9.3e-07	5_10756068	rs267949	0.930068	0.912939	RA	DAP
Ensembl_87	RA	IFNg	ENST00000510546	rs56954614	993	0.00298486	0.00385663	0.0630964	0.0806753	0.849387	4.63313e-08	9.3e-07	5_10756068	rs267949	0.930062	0.913258	RA	DAP
Ensembl_87	RA	SL1344	ENST00000510546	rs267962	988	0.000553191	0.00546906	0.0116937	0.114741	0.867543	4.00313e-10	9.3e-07	rs267962	rs267949	0.982284	0.883189	RA	DAP
Ensembl_87	RA	SL1344	ENST00000510546	5_10756068	1043	0.000553146	0.00547198	0.0116934	0.114809	0.867472	4.00313e-10	9.3e-07	rs267962	rs267949	0.982281	0.88312	RA	DAP
Ensembl_87	RA	SL1344	ENST00000510546	rs56954614	993	0.000553186	0.00546934	0.0116937	0.114748	0.867536	4.00313e-10	9.3e-07	rs267962	rs267949	0.982284	0.883183	RA	DAP
Ensembl_87	RA	IFNg_SL1344	ENST00000510546	rs267962	988	0.00107498	0.00288882	0.0227238	0.0601528	0.91316	2.37984e-09	9.3e-07	rs56954614	rs267949	0.973312	0.938198	RA	DAP
Ensembl_87	RA	IFNg_SL1344	ENST00000510546	5_10756068	1043	0.00107482	0.00289526	0.0227214	0.060292	0.913017	2.37984e-09	9.3e-07	rs56954614	rs267949	0.973309	0.938055	RA	DAP
Ensembl_87	RA	IFNg_SL1344	ENST00000510546	rs56954614	993	0.00107496	0.00288969	0.0227234	0.0601715	0.91314	2.37984e-09	9.3e-07	rs56954614	rs267949	0.973312	0.938179	RA	DAP
Ensembl_87	RA	naive	ENST00000470364	rs11264103	715	1.58396e-08	0.000114421	6.89885e-06	0.0488846	0.950994	8.37377e-17	5.2e-09	rs12116786	rs28411352	0.999879	0.951109	RA	INPP5B
Ensembl_87	RA	naive	ENST00000373027	rs28701975	713	2.55493e-07	0.000109422	0.000111279	0.0467052	0.953074	3.68176e-14	5.2e-09	rs28593140	rs28411352	0.999779	0.953284	RA	INPP5B
Ensembl_87	RA	IFNg	ENST00000470364	rs11264103	715	1.76623e-08	0.000108935	7.69271e-06	0.0464927	0.953391	3.23052e-16	5.2e-09	rs12116786	rs28411352	0.999883	0.953502	RA	INPP5B
Ensembl_87	RA	IFNg	ENST00000373027	rs28701975	713	2.26536e-06	0.000253677	0.000986668	0.109599	0.889158	1.15356e-12	5.2e-09	rs4308943	rs28411352	0.998757	0.890265	RA	INPP5B
Ensembl_87	RA	SL1344	ENST00000470364	rs11264103	715	1.92115e-05	7.84537e-05	0.00836746	0.0332117	0.958323	4.22974e-09	5.2e-09	rs12116786	rs28411352	0.991535	0.966505	RA	INPP5B
Ensembl_87	RA	SL1344	ENST00000373027	rs28701975	713	0.000721726	0.000132194	0.314345	0.0569487	0.627852	3.93112e-05	5.2e-09	rs12116786	rs28411352	0.684801	0.916839	RA	INPP5B
Ensembl_87	RA	IFNg_SL1344	ENST00000470364	rs11264103	715	0.00056509	0.000258018	0.246122	0.111737	0.641318	2.56049e-06	5.2e-09	rs557538	rs28411352	0.753055	0.851622	RA	INPP5B
Ensembl_87	RA	IFNg_SL1344	ENST00000373027	rs28701975	713	0.000945203	0.000637813	0.41168	0.277488	0.30925	2.2553e-06	5.2e-09	rs589702	rs28411352	0.586737	0.527066	RA	INPP5B
Ensembl_87	RA	naive	ENST00000466205	rs1883832	549	1.10376e-08	9.4649e-10	0.59701	0.0508424	0.352147	0.00016737	4.2e-14	rs13045771	rs4239702	0.40299	0.873837	RA	CD40
Ensembl_87	RA	IFNg	ENST00000466205	rs1883832	549	2.04114e-09	3.54384e-10	0.110403	0.0182969	0.8713	4.03058e-06	4.2e-14	rs6032660	rs4239702	0.889597	0.979432	RA	CD40
Ensembl_87	RA	SL1344	ENST00000466205	rs1883832	549	8.33735e-09	7.33885e-10	0.450958	0.0391852	0.509857	2.65299e-05	4.2e-14	rs6124765	rs4239702	0.549042	0.92863	RA	CD40
Ensembl_87	RA	IFNg_SL1344	ENST00000466205	rs1883832	549	1.57352e-08	8.21056e-10	0.8511	0.0443054	0.104594	0.0134089	4.2e-14	rs5841619	rs4239702	0.1489	0.702448	RA	CD40
Ensembl_87	RA	naive	ENST00000471026	rs10494360	670	5.18686e-06	0.000379432	0.000811647	0.0584337	0.94037	2.02884e-15	9.8e-08	rs12722986	rs4657041	0.998804	0.941496	RA	FCGR2A
Ensembl_87	RA	naive	ENST00000471026	rs10494359	663	5.18687e-06	0.000379423	0.000811639	0.0584316	0.940372	2.02884e-15	9.8e-08	rs12722986	rs4657041	0.998804	0.941498	RA	FCGR2A
Ensembl_87	RA	IFNg	ENST00000471026	rs10494360	670	1.94837e-06	0.000350051	0.000304883	0.0538309	0.945512	9.77384e-17	9.8e-08	rs12722986	rs4657041	0.999343	0.946134	RA	FCGR2A
Ensembl_87	RA	IFNg	ENST00000471026	rs10494359	663	1.94837e-06	0.000350047	0.00030488	0.0538296	0.945513	9.77384e-17	9.8e-08	rs12722986	rs4657041	0.999343	0.946135	RA	FCGR2A
Ensembl_87	RA	SL1344	ENST00000471026	rs10494360	670	8.34097e-07	0.000343212	0.000130521	0.0527595	0.946766	7.40156e-18	9.8e-08	rs12722986	rs4657041	0.999525	0.947215	RA	FCGR2A
Ensembl_87	RA	SL1344	ENST00000471026	rs10494359	663	8.34098e-07	0.000343209	0.000130519	0.0527583	0.946767	7.40156e-18	9.8e-08	rs12722986	rs4657041	0.999525	0.947217	RA	FCGR2A
Ensembl_87	RA	IFNg_SL1344	ENST00000471026	rs10494360	670	1.04565e-06	0.000340352	0.000163626	0.0523116	0.947183	4.00216e-18	9.8e-08	rs10494359	rs4657041	0.999495	0.947662	RA	FCGR2A
Ensembl_87	RA	IFNg_SL1344	ENST00000471026	rs10494359	663	1.04566e-06	0.000340349	0.000163624	0.0523105	0.947184	4.00216e-18	9.8e-08	rs10494359	rs4657041	0.999495	0.947663	RA	FCGR2A
Ensembl_87	RA	naive	ENST00000356464	rs1131017	266	1.19699e-07	0.000420213	8.17451e-06	0.0277255	0.971846	1.55377e-16	8.5e-08	rs1131017	rs773125	0.999571	0.972263	RA	RPS26
Ensembl_87	RA	naive	ENST00000552361	rs1131017	266	1.70045e-07	0.000381148	1.16128e-05	0.025055	0.974552	1.01726e-15	8.5e-08	rs11171739	rs773125	0.999607	0.974935	RA	RPS26
Ensembl_87	RA	naive	ENST00000552361	rs773125	256	1.70051e-07	0.000381161	1.15982e-05	0.0250223	0.974585	1.01726e-15	8.5e-08	rs11171739	rs773125	0.999607	0.974968	RA	RPS26
Ensembl_87	RA	IFNg	ENST00000356464	rs1131017	266	0.000596075	0.000299484	0.0407074	0.0195136	0.938883	1.19805e-07	8.5e-08	rs773125	rs773125	0.958397	0.979639	RA	RPS26
Ensembl_87	RA	IFNg	ENST00000552361	rs1131017	266	7.90442e-05	0.000283036	0.00539812	0.0183533	0.975886	1.13426e-09	8.5e-08	rs1131017	rs773125	0.99424	0.98154	RA	RPS26
Ensembl_87	RA	IFNg	ENST00000552361	rs773125	256	7.90491e-05	0.000282754	0.00539151	0.0183092	0.975937	1.13426e-09	8.5e-08	rs1131017	rs773125	0.994247	0.981585	RA	RPS26
Ensembl_87	RA	SL1344	ENST00000356464	rs1131017	266	6.76156e-09	0.000513451	4.61763e-07	0.0340994	0.965387	1.20906e-19	8.5e-08	rs1131017	rs773125	0.999486	0.965883	RA	RPS26
Ensembl_87	RA	SL1344	ENST00000552361	rs1131017	266	1.27884e-10	0.000282086	8.73354e-09	0.0182829	0.981435	1.4621e-22	8.5e-08	rs1131017	rs773125	0.999718	0.981712	RA	RPS26
Ensembl_87	RA	SL1344	ENST00000552361	rs773125	256	1.27888e-10	0.000282093	8.72253e-09	0.0182586	0.981459	1.4621e-22	8.5e-08	rs1131017	rs773125	0.999718	0.981736	RA	RPS26
Ensembl_87	RA	IFNg_SL1344	ENST00000356464	rs1131017	266	4.96953e-05	0.000296915	0.00339381	0.0193001	0.97696	8.31784e-10	8.5e-08	rs1131017	rs773125	0.99626	0.980627	RA	RPS26
Ensembl_87	RA	IFNg_SL1344	ENST00000552361	rs1131017	266	1.18739e-06	0.000205292	8.10897e-05	0.0130332	0.986679	9.99448e-14	8.5e-08	rs773125	rs773125	0.999712	0.986963	RA	RPS26
Ensembl_87	RA	IFNg_SL1344	ENST00000552361	rs773125	256	1.18741e-06	0.000205292	8.09869e-05	0.0130152	0.986697	9.99448e-14	8.5e-08	rs773125	rs773125	0.999713	0.986981	RA	RPS26
Ensembl_87	SCZ	naive	ENST00000458117	rs2274268	820	5.32575e-10	2.07028e-08	0.018816	0.731184	0.25	2.33283e-11	1.172e-13	rs28513222	rs12887734	0.981184	0.254794	SCZ	APOPT1
Ensembl_87	SCZ	naive	ENST00000440963	rs10431750	813	6.33914e-11	1.6575e-09	0.00225534	0.0580307	0.939714	4.31412e-10	1.172e-13	rs10431750	rs12887734	0.997745	0.941838	SCZ	APOPT1
Ensembl_87	SCZ	naive	ENST00000440963	rs879552	839	6.36709e-11	1.64869e-09	0.00217243	0.0553104	0.942517	4.31412e-10	1.172e-13	rs10431750	rs12887734	0.997828	0.944569	SCZ	APOPT1
Ensembl_87	SCZ	IFNg	ENST00000458117	rs2274268	820	1.15295e-09	2.61927e-09	0.0407339	0.0916719	0.867594	3.88722e-07	1.172e-13	rs10431750	rs12887734	0.959266	0.904435	SCZ	APOPT1
Ensembl_87	SCZ	IFNg	ENST00000440963	rs10431750	813	2.20808e-10	2.33635e-09	0.00785589	0.0822127	0.909931	8.9004e-09	1.172e-13	rs10431750	rs12887734	0.992144	0.917136	SCZ	APOPT1
Ensembl_87	SCZ	IFNg	ENST00000440963	rs879552	839	2.239e-10	2.28119e-09	0.00763941	0.0769182	0.915442	8.9004e-09	1.172e-13	rs10431750	rs12887734	0.992361	0.92249	SCZ	APOPT1
Ensembl_87	SCZ	SL1344	ENST00000458117	rs2274268	820	3.55423e-09	2.47031e-09	0.125572	0.0864886	0.787939	7.66157e-06	1.172e-13	rs10431750	rs12887734	0.874428	0.901091	SCZ	APOPT1
Ensembl_87	SCZ	SL1344	ENST00000440963	rs10431750	813	1.09512e-09	4.20961e-09	0.0389622	0.148957	0.812081	1.25267e-07	1.172e-13	rs111278592	rs12887734	0.961038	0.845004	SCZ	APOPT1
Ensembl_87	SCZ	SL1344	ENST00000440963	rs879552	839	1.11862e-09	4.01025e-09	0.0381671	0.136003	0.82583	1.25267e-07	1.172e-13	rs111278592	rs12887734	0.961833	0.8586	SCZ	APOPT1
Ensembl_87	SCZ	IFNg_SL1344	ENST00000458117	rs2274268	820	1.33579e-08	3.26653e-09	0.471936	0.114994	0.413069	0.000128998	1.172e-13	rs12884809	rs12887734	0.528064	0.782234	SCZ	APOPT1
Ensembl_87	SCZ	IFNg_SL1344	ENST00000440963	rs10431750	813	4.99316e-09	3.47827e-09	0.177647	0.12305	0.699303	2.80173e-06	1.172e-13	rs879552	rs12887734	0.822353	0.850368	SCZ	APOPT1
Ensembl_87	SCZ	IFNg_SL1344	ENST00000440963	rs879552	839	5.07548e-09	3.48477e-09	0.173174	0.118191	0.708635	2.80173e-06	1.172e-13	rs879552	rs12887734	0.826826	0.857055	SCZ	APOPT1
Ensembl_87	SCZ	naive	ENST00000462681	rs66782572	498	1.1858e-05	6.06945e-06	0.158952	0.0805984	0.760432	4.89816e-08	1.179e-10	rs66782572	rs139364760	0.84103	0.904167	SCZ	STAB1
Ensembl_87	SCZ	IFNg	ENST00000462681	rs66782572	498	6.63458e-05	3.09031e-06	0.889342	0.0413552	0.0692338	0.0213197	1.179e-10	rs11928763	rs139364760	0.110589	0.626046	SCZ	STAB1
Ensembl_87	SCZ	SL1344	ENST00000462681	rs66782572	498	6.52263e-05	4.18412e-06	0.874335	0.0560171	0.0695785	0.0059887	1.179e-10	rs4687617	rs139364760	0.125596	0.553989	SCZ	STAB1
Ensembl_87	SCZ	IFNg_SL1344	ENST00000462681	rs66782572	498	6.3576e-05	3.00342e-06	0.852214	0.0401522	0.107567	0.00786049	1.179e-10	rs13065744	rs139364760	0.14772	0.728186	SCZ	STAB1
Ensembl_87	SCZ	naive	ENST00000420148	rs2302417	682	1.03533e-06	6.18882e-07	0.113654	0.0671189	0.819226	2.72517e-06	3.956e-11	rs2302417	rs2535627	0.886344	0.924274	SCZ	PBRM1
Ensembl_87	SCZ	naive	ENST00000420148	rs10933	624	1.14931e-06	7.06783e-07	0.0805505	0.0486648	0.870783	2.72517e-06	3.956e-11	rs2302417	rs2535627	0.919448	0.947072	SCZ	PBRM1
Ensembl_87	SCZ	IFNg	ENST00000420148	rs2302417	682	7.26227e-06	6.40741e-07	0.797219	0.0702051	0.132568	0.00579505	3.956e-11	rs10933	rs2535627	0.202773	0.653774	SCZ	PBRM1
Ensembl_87	SCZ	IFNg	ENST00000420148	rs10933	624	1.11368e-05	9.81557e-07	0.780531	0.0686425	0.150814	0.00579505	3.956e-11	rs10933	rs2535627	0.219457	0.687216	SCZ	PBRM1
Ensembl_87	SCZ	SL1344	ENST00000420148	rs2302417	682	3.30086e-06	1.69421e-06	0.362353	0.185531	0.452111	2.79362e-06	3.956e-11	rs10933	rs2535627	0.637642	0.709036	SCZ	PBRM1
Ensembl_87	SCZ	SL1344	ENST00000420148	rs10933	624	4.2847e-06	2.31217e-06	0.300297	0.161512	0.538184	2.79362e-06	3.956e-11	rs10933	rs2535627	0.699696	0.769168	SCZ	PBRM1
Ensembl_87	SCZ	IFNg_SL1344	ENST00000420148	rs2302417	682	2.81266e-06	1.25421e-06	0.308761	0.137127	0.554108	9.80761e-05	3.956e-11	rs2577831	rs2535627	0.691235	0.80162	SCZ	PBRM1
Ensembl_87	SCZ	IFNg_SL1344	ENST00000420148	rs10933	624	4.40163e-06	1.70459e-06	0.308492	0.118895	0.572606	9.80761e-05	3.956e-11	rs2577831	rs2535627	0.691502	0.828062	SCZ	PBRM1
Ensembl_87	SCZ	naive	ENST00000289577	rs3735477	655	0.00681522	0.0125075	0.0511484	0.0930325	0.836496	1.30554e-08	7.072e-07	rs113959102	rs540425	0.929529	0.899914	SCZ	TMED4
Ensembl_87	SCZ	naive	ENST00000289577	rs217372	598	0.00680964	0.012475	0.0514496	0.0934178	0.835848	1.30554e-08	7.072e-07	rs113959102	rs540425	0.929266	0.899471	SCZ	TMED4
Ensembl_87	SCZ	naive	ENST00000289577	rs4407779	598	0.00681158	0.0124754	0.0513765	0.09326	0.836077	1.30554e-08	7.072e-07	rs113959102	rs540425	0.929337	0.899649	SCZ	TMED4
Ensembl_87	SCZ	naive	ENST00000289577	rs151027659;rs35408903	627	0.00680828	0.0124803	0.0514851	0.0935422	0.835684	1.30554e-08	7.072e-07	rs113959102	rs540425	0.929226	0.899333	SCZ	TMED4
Ensembl_87	SCZ	IFNg	ENST00000289577	rs3735477	655	0.000117112	0.0166619	0.000878929	0.124189	0.858153	4.92002e-12	7.072e-07	rs217393	rs540425	0.982342	0.873578	SCZ	TMED4
Ensembl_87	SCZ	IFNg	ENST00000289577	rs217372	598	0.000117013	0.0166475	0.000884085	0.124921	0.85743	4.92002e-12	7.072e-07	rs217393	rs540425	0.982351	0.872835	SCZ	TMED4
Ensembl_87	SCZ	IFNg	ENST00000289577	rs4407779	598	0.000117039	0.016651	0.000882768	0.124733	0.857616	4.92002e-12	7.072e-07	rs217393	rs540425	0.982349	0.873026	SCZ	TMED4
Ensembl_87	SCZ	IFNg	ENST00000289577	rs151027659;rs35408903	627	0.000117	0.0166458	0.00088477	0.12502	0.857332	4.92002e-12	7.072e-07	rs217393	rs540425	0.982352	0.872734	SCZ	TMED4
Ensembl_87	SCZ	SL1344	ENST00000289577	rs3735477	655	0.00194859	0.0153087	0.0146242	0.114038	0.85408	5.83613e-09	7.072e-07	rs4407779	rs540425	0.968118	0.882206	SCZ	TMED4
Ensembl_87	SCZ	SL1344	ENST00000289577	rs217372	598	0.00194708	0.0152854	0.014711	0.114634	0.853422	5.83613e-09	7.072e-07	rs4407779	rs540425	0.968057	0.881583	SCZ	TMED4
Ensembl_87	SCZ	SL1344	ENST00000289577	rs4407779	598	0.00194751	0.015289	0.0146891	0.114464	0.85361	5.83613e-09	7.072e-07	rs4407779	rs540425	0.968074	0.881761	SCZ	TMED4
Ensembl_87	SCZ	SL1344	ENST00000289577	rs151027659;rs35408903	627	0.00194675	0.0152885	0.0147216	0.114761	0.853282	5.83613e-09	7.072e-07	rs4407779	rs540425	0.968043	0.881451	SCZ	TMED4
Ensembl_87	SCZ	IFNg_SL1344	ENST00000289577	rs3735477	655	0.00261861	0.0081989	0.0196527	0.060624	0.908906	5.3455e-08	7.072e-07	rs151027659;rs35408903	rs540425	0.96953	0.937471	SCZ	TMED4
Ensembl_87	SCZ	IFNg_SL1344	ENST00000289577	rs217372	598	0.00261756	0.00817806	0.0197767	0.06088	0.908548	5.3455e-08	7.072e-07	rs151027659;rs35408903	rs540425	0.969428	0.9372	SCZ	TMED4
Ensembl_87	SCZ	IFNg_SL1344	ENST00000289577	rs4407779	598	0.00261793	0.00817923	0.0197458	0.0607833	0.908674	5.3455e-08	7.072e-07	rs151027659;rs35408903	rs540425	0.969457	0.937302	SCZ	TMED4
Ensembl_87	SCZ	IFNg_SL1344	ENST00000289577	rs151027659;rs35408903	627	0.00261715	0.00818573	0.0197913	0.0609932	0.908413	5.3455e-08	7.072e-07	rs151027659;rs35408903	rs540425	0.969406	0.937082	SCZ	TMED4
Ensembl_87	SCZ	naive	ENST00000420189	rs3731901	630	0.0138975	0.0110943	0.0695148	0.0546422	0.850851	8.43267e-07	9.505e-07	rs3731901	rs6707588	0.905493	0.939655	SCZ	FAM134A
Ensembl_87	SCZ	naive	ENST00000420189	rs79192847	632	0.0138973	0.0110968	0.0695138	0.0546551	0.850837	8.43267e-07	9.505e-07	rs3731901	rs6707588	0.905492	0.93964	SCZ	FAM134A
Ensembl_87	SCZ	IFNg	ENST00000420189	rs3731901	630	0.0397101	0.0225142	0.198628	0.111988	0.627159	3.76799e-06	9.505e-07	rs79192847	rs6707588	0.739147	0.84849	SCZ	FAM134A
Ensembl_87	SCZ	IFNg	ENST00000420189	rs79192847	632	0.039708	0.0225217	0.198618	0.112026	0.627126	3.76799e-06	9.505e-07	rs79192847	rs6707588	0.739152	0.84844	SCZ	FAM134A
Ensembl_87	SCZ	SL1344	ENST00000420189	rs3731901	630	0.136392	0.00827272	0.682226	0.0412479	0.131862	0.018209	9.505e-07	rs71352184	rs6707588	0.17311	0.761724	SCZ	FAM134A
Ensembl_87	SCZ	SL1344	ENST00000420189	rs79192847	632	0.136375	0.0082922	0.682142	0.0413455	0.131846	0.018209	9.505e-07	rs71352184	rs6707588	0.173191	0.761272	SCZ	FAM134A
Ensembl_87	SCZ	IFNg_SL1344	ENST00000420189	rs3731901	630	0.131993	0.00957615	0.660222	0.047749	0.15046	0.00510605	9.505e-07	rs3731900	rs6707588	0.198209	0.759098	SCZ	FAM134A
Ensembl_87	SCZ	IFNg_SL1344	ENST00000420189	rs79192847	632	0.131977	0.00959485	0.660144	0.0478428	0.150442	0.00510605	9.505e-07	rs3731900	rs6707588	0.198285	0.758717	SCZ	FAM134A
Ensembl_87	SLE	naive	ENST00000423376	rs1978273	714	9.41478e-15	8.79755e-15	0.0199722	0.0177005	0.962327	8.80821e-08	3.60855e-19	rs1978273	rs2293765	0.980028	0.981939	SLE	NAB1
Ensembl_87	SLE	IFNg	ENST00000423376	rs1978273	714	1.94283e-13	2.38593e-14	0.412146	0.0500765	0.537777	0.000415794	3.60855e-19	rs2293765	rs2293765	0.587854	0.914815	SLE	NAB1
Ensembl_87	SLE	SL1344	ENST00000423376	rs1978273	714	2.7993e-13	2.86795e-14	0.593835	0.0604942	0.345671	0.00205034	3.60855e-19	rs2293765	rs2293765	0.406165	0.85106	SLE	NAB1
Ensembl_87	SLE	IFNg_SL1344	ENST00000423376	rs1978273	714	4.05489e-13	2.70401e-14	0.860191	0.0572796	0.0825291	0.0063122	3.60855e-19	rs201660262	rs2293765	0.139809	0.5903	SLE	NAB1
Ensembl_87	CAD	naive	ENST00000456827	rs146480536	911	2.77785e-08	2.21452e-08	0.0217645	0.0163889	0.961847	3.92112e-09	5.15e-12	rs146480536	rs1412444	0.978235	0.983246	CAD	LIPA
Ensembl_87	CAD	naive	ENST00000456827	rs1332329	916	2.77782e-08	2.21577e-08	0.0217642	0.0163987	0.961837	3.92112e-09	5.15e-12	rs146480536	rs1412444	0.978236	0.983236	CAD	LIPA
Ensembl_87	CAD	naive	ENST00000456827	rs2246833	914	2.77783e-08	2.21527e-08	0.0217643	0.0163949	0.961841	3.92112e-09	5.15e-12	rs146480536	rs1412444	0.978236	0.98324	CAD	LIPA
Ensembl_87	CAD	IFNg	ENST00000456827	rs146480536	911	7.93677e-09	1.64406e-08	0.00621847	0.0118993	0.981882	1.94375e-09	5.15e-12	rs1332329	rs1412444	0.993782	0.988026	CAD	LIPA
Ensembl_87	CAD	IFNg	ENST00000456827	rs1332329	916	7.93676e-09	1.64422e-08	0.00621846	0.0119006	0.981881	1.94375e-09	5.15e-12	rs1332329	rs1412444	0.993782	0.988025	CAD	LIPA
Ensembl_87	CAD	IFNg	ENST00000456827	rs2246833	914	7.93677e-09	1.64414e-08	0.00621846	0.0119	0.981882	1.94375e-09	5.15e-12	rs1332329	rs1412444	0.993782	0.988026	CAD	LIPA
Ensembl_87	CAD	SL1344	ENST00000456827	rs146480536	911	7.60407e-11	1.76766e-08	5.9578e-05	0.0128625	0.987078	2.87351e-14	5.15e-12	rs2246833	rs1412444	0.99994	0.987137	CAD	LIPA
Ensembl_87	CAD	SL1344	ENST00000456827	rs1332329	916	7.60407e-11	1.76766e-08	5.9578e-05	0.0128625	0.987078	2.87351e-14	5.15e-12	rs2246833	rs1412444	0.99994	0.987137	CAD	LIPA
Ensembl_87	CAD	SL1344	ENST00000456827	rs2246833	914	7.60407e-11	1.76766e-08	5.9578e-05	0.0128625	0.987078	2.87351e-14	5.15e-12	rs2246833	rs1412444	0.99994	0.987137	CAD	LIPA
Ensembl_87	CAD	IFNg_SL1344	ENST00000456827	rs146480536	911	5.22404e-10	1.83462e-08	0.000409304	0.0133881	0.986203	2.1795e-12	5.15e-12	rs146480536	rs1412444	0.999591	0.986606	CAD	LIPA
Ensembl_87	CAD	IFNg_SL1344	ENST00000456827	rs1332329	916	5.22404e-10	1.83468e-08	0.000409304	0.0133885	0.986202	2.1795e-12	5.15e-12	rs146480536	rs1412444	0.999591	0.986606	CAD	LIPA
Ensembl_87	CAD	IFNg_SL1344	ENST00000456827	rs2246833	914	5.22404e-10	1.83467e-08	0.000409304	0.0133885	0.986202	2.1795e-12	5.15e-12	rs146480536	rs1412444	0.999591	0.986606	CAD	LIPA
Ensembl_87	CAD	naive	ENST00000309042	rs3796529	1379	0.000354973	0.000295789	0.0637546	0.0522414	0.883353	5.3472e-08	4.59e-08	rs3796529	rs17087335	0.935595	0.944162	CAD	REST
Ensembl_87	CAD	IFNg	ENST00000309042	rs3796529	1379	0.0042872	0.000591671	0.769999	0.106147	0.118975	0.00872868	4.59e-08	rs11728518	rs17087335	0.225123	0.528491	CAD	REST
Ensembl_87	CAD	SL1344	ENST00000309042	rs3796529	1379	0.00432397	0.000567736	0.776602	0.101851	0.116655	0.0027538	4.59e-08	rs66574323	rs17087335	0.218506	0.533876	CAD	REST
Ensembl_87	CAD	IFNg_SL1344	ENST00000309042	rs3796529	1379	0.00379194	0.000916757	0.681046	0.164503	0.149742	3.49582e-05	4.59e-08	rs62308101	rs17087335	0.314245	0.476512	CAD	REST
Ensembl_87	CAD	naive	ENST00000452243	rs1894400	1031	2.60993e-10	0.000162749	3.10662e-08	0.0183906	0.981447	8.70687e-22	5.01e-08	rs1894400	rs2521501	0.999837	0.981606	CAD	FES
Ensembl_87	CAD	IFNg	ENST00000452243	rs1894400	1031	2.91545e-08	0.000183965	3.47028e-06	0.0209186	0.978894	3.20523e-17	5.01e-08	rs1894400	rs2521501	0.999813	0.979077	CAD	FES
Ensembl_87	CAD	SL1344	ENST00000452243	rs1894400	1031	0.00348612	0.000506613	0.414955	0.0597812	0.521271	8.56669e-05	5.01e-08	rs1894400	rs2521501	0.581052	0.897115	CAD	FES
Ensembl_87	CAD	IFNg_SL1344	ENST00000452243	rs1894400	1031	0.00671158	0.000651921	0.798885	0.0774824	0.116269	0.00388713	5.01e-08	rs113025169	rs2521501	0.193752	0.600094	CAD	FES
Ensembl_87	CAD	naive	ENST00000344086	rs11265613	903	8.36757e-08	0.000113856	0.00017313	0.234809	0.764904	9.76857e-15	2.6e-09	rs11265613	rs6689306	0.999713	0.765124	CAD	IL6R
Ensembl_87	CAD	naive	ENST00000344086	rs6686750	899	8.36757e-08	0.000113856	0.00017313	0.234809	0.764904	9.76857e-15	2.6e-09	rs11265613	rs6689306	0.999713	0.765124	CAD	IL6R
Ensembl_87	CAD	IFNg	ENST00000344086	rs11265613	903	2.80454e-08	0.000147812	5.80275e-05	0.305137	0.694657	3.69239e-16	2.6e-09	rs11265613	rs6689306	0.999794	0.6948	CAD	IL6R
Ensembl_87	CAD	IFNg	ENST00000344086	rs6686750	899	2.80454e-08	0.000147812	5.80275e-05	0.305137	0.694657	3.69239e-16	2.6e-09	rs11265613	rs6689306	0.999794	0.6948	CAD	IL6R
Ensembl_87	CAD	SL1344	ENST00000344086	rs11265613	903	0.000160671	4.79242e-05	0.332437	0.0985892	0.568765	2.44841e-05	2.6e-09	rs12126142	rs6689306	0.667355	0.852269	CAD	IL6R
Ensembl_87	CAD	SL1344	ENST00000344086	rs6686750	899	0.000160688	4.78767e-05	0.332473	0.0984907	0.568828	2.44841e-05	2.6e-09	rs12126142	rs6689306	0.667318	0.852408	CAD	IL6R
Ensembl_87	CAD	IFNg_SL1344	ENST00000344086	rs11265613	903	1.27333e-06	2.0833e-05	0.00263459	0.0421496	0.955194	3.24745e-10	2.6e-09	rs6686750	rs6689306	0.997343	0.957738	CAD	IL6R
Ensembl_87	CAD	IFNg_SL1344	ENST00000344086	rs6686750	899	1.27333e-06	2.08327e-05	0.00263459	0.0421489	0.955194	3.24745e-10	2.6e-09	rs6686750	rs6689306	0.997343	0.957739	CAD	IL6R
Ensembl_87	MI	naive	ENST00000452243	rs1894400	1031	5.93164e-10	0.000369882	6.00719e-08	0.0364961	0.963134	8.70687e-22	7.38837e-08	rs1894400	rs11372849	0.99963	0.96349	MI	FES
Ensembl_87	MI	IFNg	ENST00000452243	rs1894400	1031	6.44956e-08	0.000406968	6.53171e-06	0.0402558	0.959331	3.20523e-17	7.38837e-08	rs1894400	rs11372849	0.999586	0.959728	MI	FES
Ensembl_87	MI	SL1344	ENST00000452243	rs1894400	1031	0.00540049	0.000784815	0.546927	0.0791132	0.367774	8.56669e-05	7.38837e-08	rs1894400	rs11372849	0.446888	0.822968	MI	FES
Ensembl_87	MI	IFNg_SL1344	ENST00000452243	rs1894400	1031	0.00793078	0.000770346	0.803179	0.0779055	0.110215	0.00388713	7.38837e-08	rs113025169	rs11372849	0.18812	0.585874	MI	FES
Ensembl_87	MI	naive	ENST00000344086	rs11265613	903	4.00197e-06	0.00544538	0.000324777	0.441364	0.552862	9.76857e-15	1.17903e-07	rs11265613	rs12118721	0.994226	0.556073	MI	IL6R
Ensembl_87	MI	naive	ENST00000344086	rs6686750	899	4.00197e-06	0.00544538	0.000324777	0.441363	0.552862	9.76857e-15	1.17903e-07	rs11265613	rs12118721	0.994226	0.556073	MI	IL6R
Ensembl_87	MI	IFNg	ENST00000344086	rs11265613	903	1.58984e-06	0.00837918	0.000129022	0.679695	0.311795	3.69239e-16	1.17903e-07	rs11265613	rs12118721	0.99149	0.314471	MI	IL6R
Ensembl_87	MI	IFNg	ENST00000344086	rs6686750	899	1.58984e-06	0.00837918	0.000129022	0.679695	0.311795	3.69239e-16	1.17903e-07	rs11265613	rs12118721	0.99149	0.314471	MI	IL6R
Ensembl_87	MI	SL1344	ENST00000344086	rs11265613	903	0.00439074	0.00130965	0.356328	0.105752	0.53222	2.44841e-05	1.17903e-07	rs12126142	rs12118721	0.637972	0.834237	MI	IL6R
Ensembl_87	MI	SL1344	ENST00000344086	rs6686750	899	0.00439126	0.00130837	0.35637	0.105647	0.532283	2.44841e-05	1.17903e-07	rs12126142	rs12118721	0.637931	0.834391	MI	IL6R
Ensembl_87	MI	IFNg_SL1344	ENST00000344086	rs11265613	903	2.62663e-05	0.000429745	0.00213163	0.0339122	0.9635	3.24745e-10	1.17903e-07	rs6686750	rs12118721	0.997412	0.966	MI	IL6R
Ensembl_87	MI	IFNg_SL1344	ENST00000344086	rs6686750	899	2.62663e-05	0.000429739	0.00213163	0.0339117	0.963501	3.24745e-10	1.17903e-07	rs6686750	rs12118721	0.997412	0.966	MI	IL6R
Ensembl_87	MI	naive	ENST00000456827	rs146480536	911	1.74691e-09	1.39265e-09	0.0190554	0.0142244	0.96672	3.92112e-09	2.6849e-13	rs146480536	rs1332329	0.980945	0.985499	MI	LIPA
Ensembl_87	MI	naive	ENST00000456827	rs1332329	916	1.74689e-09	1.39343e-09	0.0190552	0.0142329	0.966712	3.92112e-09	2.6849e-13	rs146480536	rs1332329	0.980945	0.985491	MI	LIPA
Ensembl_87	MI	naive	ENST00000456827	rs2246833	914	1.7469e-09	1.39312e-09	0.0190553	0.0142295	0.966715	3.92112e-09	2.6849e-13	rs146480536	rs1332329	0.980945	0.985494	MI	LIPA
Ensembl_87	MI	IFNg	ENST00000456827	rs146480536	911	4.70237e-10	9.7407e-10	0.00512937	0.00963998	0.985231	1.94375e-09	2.6849e-13	rs1332329	rs1332329	0.994871	0.99031	MI	LIPA
Ensembl_87	MI	IFNg	ENST00000456827	rs1332329	916	4.70237e-10	9.74169e-10	0.00512937	0.00964106	0.98523	1.94375e-09	2.6849e-13	rs1332329	rs1332329	0.994871	0.990309	MI	LIPA
Ensembl_87	MI	IFNg	ENST00000456827	rs2246833	914	4.70237e-10	9.74121e-10	0.00512937	0.00964053	0.98523	1.94375e-09	2.6849e-13	rs1332329	rs1332329	0.994871	0.99031	MI	LIPA
Ensembl_87	MI	SL1344	ENST00000456827	rs146480536	911	4.75227e-12	1.10472e-09	5.1838e-05	0.0110615	0.988887	2.87351e-14	2.6849e-13	rs2246833	rs1332329	0.999948	0.988938	MI	LIPA
Ensembl_87	MI	SL1344	ENST00000456827	rs1332329	916	4.75227e-12	1.10472e-09	5.1838e-05	0.0110615	0.988887	2.87351e-14	2.6849e-13	rs2246833	rs1332329	0.999948	0.988938	MI	LIPA
Ensembl_87	MI	SL1344	ENST00000456827	rs2246833	914	4.75227e-12	1.10472e-09	5.1838e-05	0.0110615	0.988887	2.87351e-14	2.6849e-13	rs2246833	rs1332329	0.999948	0.988938	MI	LIPA
Ensembl_87	MI	IFNg_SL1344	ENST00000456827	rs146480536	911	3.09046e-11	1.08533e-09	0.000337109	0.0108501	0.988813	2.1795e-12	2.6849e-13	rs146480536	rs1332329	0.999663	0.989146	MI	LIPA
Ensembl_87	MI	IFNg_SL1344	ENST00000456827	rs1332329	916	3.09046e-11	1.08537e-09	0.000337109	0.0108505	0.988812	2.1795e-12	2.6849e-13	rs146480536	rs1332329	0.999663	0.989146	MI	LIPA
Ensembl_87	MI	IFNg_SL1344	ENST00000456827	rs2246833	914	3.09046e-11	1.08536e-09	0.000337109	0.0108504	0.988812	2.1795e-12	2.6849e-13	rs146480536	rs1332329	0.999663	0.989146	MI	LIPA
Ensembl_87	MI	naive	ENST00000491598	rs12703513	742	0.00160633	0.00121045	0.0315325	0.0228185	0.942832	1.89815e-10	3.9163e-07	rs12703513	rs3735352	0.965651	0.97637	MI	PARP12
Ensembl_87	MI	naive	ENST00000491598	rs2269996	744	0.00160635	0.00120999	0.0315328	0.0228094	0.942841	1.89815e-10	3.9163e-07	rs12703513	rs3735352	0.965651	0.976379	MI	PARP12
Ensembl_87	MI	naive	ENST00000491598	rs142432643	740	0.00160633	0.00121016	0.0315346	0.0228144	0.942834	1.89815e-10	3.9163e-07	rs12703513	rs3735352	0.965649	0.976374	MI	PARP12
Ensembl_87	MI	IFNg	ENST00000491598	rs12703513	742	5.58846e-05	0.00103662	0.00109702	0.0193707	0.97844	5.15748e-14	3.9163e-07	rs757835	rs3735352	0.99781	0.980587	MI	PARP12
Ensembl_87	MI	IFNg	ENST00000491598	rs2269996	744	5.58846e-05	0.00103665	0.00109702	0.0193711	0.978439	5.15748e-14	3.9163e-07	rs757835	rs3735352	0.99781	0.980586	MI	PARP12
Ensembl_87	MI	IFNg	ENST00000491598	rs142432643	740	5.58845e-05	0.00103666	0.00109709	0.0193727	0.978438	5.15748e-14	3.9163e-07	rs757835	rs3735352	0.99781	0.980585	MI	PARP12
Ensembl_87	MI	SL1344	ENST00000491598	rs12703513	742	0.000150233	0.00121991	0.00294909	0.0229743	0.972706	7.88082e-13	3.9163e-07	rs142432643	rs3735352	0.995681	0.976926	MI	PARP12
Ensembl_87	MI	SL1344	ENST00000491598	rs2269996	744	0.000150233	0.00121992	0.00294909	0.0229745	0.972706	7.88082e-13	3.9163e-07	rs142432643	rs3735352	0.995681	0.976926	MI	PARP12
Ensembl_87	MI	SL1344	ENST00000491598	rs142432643	740	0.000150232	0.00121989	0.00294928	0.0229754	0.972705	7.88082e-13	3.9163e-07	rs142432643	rs3735352	0.995681	0.976925	MI	PARP12
Ensembl_87	MI	IFNg_SL1344	ENST00000491598	rs12703513	742	2.99198e-05	0.00114675	0.000587331	0.0215343	0.976702	5.51826e-15	3.9163e-07	rs757835	rs3735352	0.998236	0.978428	MI	PARP12
Ensembl_87	MI	IFNg_SL1344	ENST00000491598	rs2269996	744	2.99198e-05	0.00114676	0.00058733	0.0215343	0.976702	5.51826e-15	3.9163e-07	rs757835	rs3735352	0.998236	0.978428	MI	PARP12
Ensembl_87	MI	IFNg_SL1344	ENST00000491598	rs142432643	740	2.99197e-05	0.00114678	0.000587367	0.0215362	0.9767	5.51826e-15	3.9163e-07	rs757835	rs3735352	0.998236	0.978426	MI	PARP12
Ensembl_87	MI	naive	ENST00000589759	rs2301647	639	0.00280042	0.00531308	0.0272259	0.0507403	0.91392	1.82291e-07	3.4012e-07	rs62075803	rs4796663	0.964661	0.947401	MI	ATP6V0A1
Ensembl_87	MI	naive	ENST00000589759	rs12453490	583	0.0027419	0.0057506	0.0276952	0.0571786	0.906634	1.82291e-07	3.4012e-07	rs62075803	rs4796663	0.963812	0.940675	MI	ATP6V0A1
Ensembl_87	MI	IFNg	ENST00000589759	rs2301647	639	0.009885	0.00785979	0.0961027	0.0756029	0.81055	4.04841e-06	3.4012e-07	rs12453490	rs4796663	0.886152	0.914684	MI	ATP6V0A1
Ensembl_87	MI	IFNg	ENST00000589759	rs12453490	583	0.00947441	0.00842409	0.0956984	0.0842873	0.802116	4.04841e-06	3.4012e-07	rs12453490	rs4796663	0.886403	0.904911	MI	ATP6V0A1
Ensembl_87	MI	SL1344	ENST00000589759	rs2301647	639	0.0579413	0.00662541	0.563309	0.0641047	0.308019	0.00021366	3.4012e-07	rs117131990	rs4796663	0.372124	0.827733	MI	ATP6V0A1
Ensembl_87	MI	SL1344	ENST00000589759	rs12453490	583	0.0559569	0.00654295	0.565205	0.0657821	0.306513	0.00021366	3.4012e-07	rs117131990	rs4796663	0.372295	0.823306	MI	ATP6V0A1
Ensembl_87	MI	IFNg_SL1344	ENST00000589759	rs2301647	639	0.0628442	0.00559879	0.610976	0.0541654	0.266416	0.00119319	3.4012e-07	rs2170711	rs4796663	0.320581	0.83104	MI	ATP6V0A1
Ensembl_87	MI	IFNg_SL1344	ENST00000589759	rs12453490	583	0.0607886	0.00542366	0.614009	0.0545177	0.265261	0.00119319	3.4012e-07	rs2170711	rs4796663	0.319779	0.829514	MI	ATP6V0A1
Ensembl_87	CRE	naive	ENST00000503513	rs10062079	966	6.35342e-07	0.00337561	4.29506e-06	0.0218452	0.974774	3.04187e-16	4.54e-07	rs10062079	rs13179493	0.996619	0.978081	CRE	DAB2
Ensembl_87	CRE	naive	ENST00000503513	rs10512696	1010	6.35161e-07	0.00337466	4.34726e-06	0.0221228	0.974498	3.04187e-16	4.54e-07	rs10062079	rs13179493	0.99662	0.977802	CRE	DAB2
Ensembl_87	CRE	IFNg	ENST00000503513	rs10062079	966	0.000996283	0.0072507	0.00673511	0.0480796	0.936938	3.31278e-10	4.54e-07	rs10512696	rs13179493	0.985018	0.951189	CRE	DAB2
Ensembl_87	CRE	IFNg	ENST00000503513	rs10512696	1010	0.000995552	0.00724948	0.00681389	0.0486816	0.936259	3.31278e-10	4.54e-07	rs10512696	rs13179493	0.984941	0.950574	CRE	DAB2
Ensembl_87	CRE	SL1344	ENST00000503513	rs10062079	966	0.0632926	0.0160626	0.427873	0.108203	0.384569	2.58761e-05	4.54e-07	rs4957474	rs13179493	0.492772	0.78042	CRE	DAB2
Ensembl_87	CRE	SL1344	ENST00000503513	rs10512696	1010	0.0627277	0.0161505	0.429329	0.110158	0.381634	2.58761e-05	4.54e-07	rs4957474	rs13179493	0.491792	0.776007	CRE	DAB2
Ensembl_87	CRE	IFNg_SL1344	ENST00000503513	rs10062079	966	0.0439707	0.00834438	0.297252	0.0558154	0.594617	1.80826e-05	4.54e-07	rs10512696	rs13179493	0.650433	0.914187	CRE	DAB2
Ensembl_87	CRE	IFNg_SL1344	ENST00000503513	rs10512696	1010	0.0436663	0.00855895	0.298867	0.0579894	0.590919	1.80826e-05	4.54e-07	rs10512696	rs13179493	0.648908	0.910635	CRE	DAB2
Ensembl_87	CRP	naive	ENST00000344086	rs11265613	946	8.55293e-18	1.21329e-14	2.9918e-05	0.0414823	0.958488	9.76857e-15	1.99e-18	rs11265613	rs4393147	0.99997	0.958516	CRP	IL6R
Ensembl_87	CRP	naive	ENST00000344086	rs6686750	942	8.55293e-18	1.21329e-14	2.9918e-05	0.0414823	0.958488	9.76857e-15	1.99e-18	rs11265613	rs4393147	0.99997	0.958516	CRP	IL6R
Ensembl_87	CRP	IFNg	ENST00000344086	rs11265613	946	5.5105e-18	2.93378e-14	1.92756e-05	0.101725	0.898256	3.69239e-16	1.99e-18	rs11265613	rs4393147	0.999981	0.898273	CRP	IL6R
Ensembl_87	CRP	IFNg	ENST00000344086	rs6686750	942	5.5105e-18	2.93378e-14	1.92756e-05	0.101725	0.898256	3.69239e-16	1.99e-18	rs11265613	rs4393147	0.999981	0.898273	CRP	IL6R
Ensembl_87	CRP	SL1344	ENST00000344086	rs11265613	946	4.98057e-14	1.58952e-14	0.17422	0.0548302	0.77095	2.44841e-05	1.99e-18	rs12126142	rs4393147	0.82578	0.933602	CRP	IL6R
Ensembl_87	CRP	SL1344	ENST00000344086	rs6686750	942	4.98086e-14	1.58797e-14	0.17423	0.0547761	0.770994	2.44841e-05	1.99e-18	rs12126142	rs4393147	0.82577	0.933667	CRP	IL6R
Ensembl_87	CRP	IFNg_SL1344	ENST00000344086	rs11265613	946	4.04042e-15	6.7749e-14	0.0141333	0.236235	0.749631	3.24745e-10	1.99e-18	rs6686750	rs4393147	0.985867	0.760378	CRP	IL6R
Ensembl_87	CRP	IFNg_SL1344	ENST00000344086	rs6686750	942	4.04044e-15	6.77482e-14	0.0141334	0.236232	0.749634	3.24745e-10	1.99e-18	rs6686750	rs4393147	0.985867	0.760381	CRP	IL6R
Ensembl_87	CRP	naive	ENST00000611786	rs200887234	427	0.0102324	0.00240147	0.415408	0.097018	0.474941	1.43296e-05	1.45e-07	rs62130707	rs7586601	0.571958	0.830376	CRP	ATRAID
Ensembl_87	CRP	IFNg	ENST00000611786	rs200887234	427	0.0013773	0.00214954	0.0559146	0.086411	0.854148	1.83933e-07	1.45e-07	rs200887234	rs7586601	0.940559	0.908128	CRP	ATRAID
Ensembl_87	CRP	SL1344	ENST00000611786	rs200887234	427	0.019115	0.00111975	0.776015	0.0453001	0.158451	0.00970853	1.45e-07	rs1275539	rs7586601	0.203751	0.777669	CRP	ATRAID
Ensembl_87	CRP	IFNg_SL1344	ENST00000611786	rs200887234	427	0.0100838	0.00160897	0.409373	0.0648055	0.514129	3.60224e-05	1.45e-07	rs4665961	rs7586601	0.578934	0.888061	CRP	ATRAID
Ensembl_87	CRP	naive	ENST00000445832	rs2264778	1389	3.35457e-44	4.56731e-45	0.80697	0.109787	0.0832429	0.00342456	8.9e-50	rs146012491	rs7979478	0.19303	0.431243	CRP	C12orf43
Ensembl_87	CRP	IFNg	ENST00000445832	rs2264778	1389	3.05293e-44	4.97473e-45	0.734408	0.119525	0.146067	0.000204225	8.9e-50	rs2071190	rs7979478	0.265592	0.549966	CRP	C12orf43
Ensembl_87	CRP	SL1344	ENST00000445832	rs2264778	1389	5.33199e-45	3.09327e-45	0.128265	0.0736129	0.798122	1.45808e-06	8.9e-50	rs2264778	rs7979478	0.871735	0.915556	CRP	C12orf43
Ensembl_87	CRP	IFNg_SL1344	ENST00000445832	rs2264778	1389	3.24532e-44	4.83342e-45	0.780689	0.116169	0.103142	0.000709641	8.9e-50	rs45555142	rs7979478	0.219311	0.470301	CRP	C12orf43
Ensembl_87	HDL	naive	ENST00000586510	rs55938653	1398	1.72531e-08	2.2212e-05	8.47565e-05	0.108226	0.891667	2.09259e-14	3.68e-10	rs55938653	rs75371359	0.999893	0.891763	HDL	PGS1
Ensembl_87	HDL	naive	ENST00000586510	rs17561950	1389	1.72531e-08	2.2212e-05	8.47565e-05	0.108226	0.891667	2.09259e-14	3.68e-10	rs55938653	rs75371359	0.999893	0.891763	HDL	PGS1
Ensembl_87	HDL	IFNg	ENST00000586510	rs55938653	1398	1.65801e-05	2.00647e-05	0.0814504	0.0977478	0.820765	3.97259e-07	3.68e-10	rs17561950	rs75371359	0.918513	0.89358	HDL	PGS1
Ensembl_87	HDL	IFNg	ENST00000586510	rs17561950	1389	1.6581e-05	2.00548e-05	0.0814548	0.0976993	0.820809	3.97259e-07	3.68e-10	rs17561950	rs75371359	0.918509	0.893633	HDL	PGS1
Ensembl_87	HDL	SL1344	ENST00000586510	rs55938653	1398	5.93179e-06	1.77064e-05	0.0291402	0.0860989	0.884737	2.51559e-08	3.68e-10	rs17561950	rs75371359	0.970836	0.911315	HDL	PGS1
Ensembl_87	HDL	SL1344	ENST00000586510	rs17561950	1389	5.93191e-06	1.77028e-05	0.0291407	0.086081	0.884755	2.51559e-08	3.68e-10	rs17561950	rs75371359	0.970836	0.911333	HDL	PGS1
Ensembl_87	HDL	IFNg_SL1344	ENST00000586510	rs55938653	1398	0.0001141	2.15005e-05	0.560519	0.105288	0.334057	0.00172039	3.68e-10	rs7207782	rs75371359	0.439345	0.760353	HDL	PGS1
Ensembl_87	HDL	IFNg_SL1344	ENST00000586510	rs17561950	1389	0.000114192	2.13528e-05	0.560974	0.104562	0.334328	0.00172039	3.68e-10	rs7207782	rs75371359	0.43889	0.761758	HDL	PGS1
Ensembl_87	HGB	naive	ENST00000507468	rs200269341	855	0.0151707	0.00116195	0.852475	0.0652267	0.0659661	0.0141185	1.45e-07	rs13131194	rs3841987	0.131193	0.502818	HGB	AFF1
Ensembl_87	HGB	IFNg	ENST00000507468	rs200269341	855	0.0150932	0.00111643	0.848121	0.0626617	0.0730079	0.0142882	1.45e-07	rs3775229	rs3841987	0.13567	0.53813	HGB	AFF1
Ensembl_87	HGB	SL1344	ENST00000507468	rs200269341	855	0.00230769	0.00134549	0.129674	0.0748141	0.791859	7.06027e-06	1.45e-07	rs200269341	rs3841987	0.866673	0.913677	HGB	AFF1
Ensembl_87	HGB	IFNg_SL1344	ENST00000507468	rs200269341	855	0.0152318	0.00109619	0.855906	0.0615309	0.0662353	0.0481613	1.45e-07	rs201889856	rs3841987	0.127766	0.51841	HGB	AFF1
Ensembl_87	IL6	naive	ENST00000344086	rs11265613	946	5.44478e-25	7.7238e-22	1.40541e-05	0.0189557	0.98103	9.76857e-15	1.47e-25	rs11265613	rs12126142	0.999986	0.981044	IL6	IL6R
Ensembl_87	IL6	naive	ENST00000344086	rs6686750	942	5.44478e-25	7.7238e-22	1.40541e-05	0.0189557	0.98103	9.76857e-15	1.47e-25	rs11265613	rs12126142	0.999986	0.981044	IL6	IL6R
Ensembl_87	IL6	IFNg	ENST00000344086	rs11265613	946	1.16809e-25	6.21889e-22	3.01508e-06	0.0150673	0.98493	3.69239e-16	1.47e-25	rs11265613	rs12126142	0.999997	0.984933	IL6	IL6R
Ensembl_87	IL6	IFNg	ENST00000344086	rs6686750	942	1.16809e-25	6.21888e-22	3.01508e-06	0.0150673	0.98493	3.69239e-16	1.47e-25	rs11265613	rs12126142	0.999997	0.984933	IL6	IL6R
Ensembl_87	IL6	SL1344	ENST00000344086	rs11265613	946	6.79909e-21	2.16989e-21	0.175498	0.0552399	0.769262	2.44841e-05	1.47e-25	rs12126142	rs12126142	0.824502	0.933002	IL6	IL6R
Ensembl_87	IL6	SL1344	ENST00000344086	rs6686750	942	6.79948e-21	2.16778e-21	0.175508	0.0551855	0.769306	2.44841e-05	1.47e-25	rs12126142	rs12126142	0.824492	0.933067	IL6	IL6R
Ensembl_87	IL6	IFNg_SL1344	ENST00000344086	rs11265613	946	2.83216e-22	4.7489e-21	0.00731037	0.121708	0.870982	3.24745e-10	1.47e-25	rs6686750	rs12126142	0.99269	0.877396	IL6	IL6R
Ensembl_87	IL6	IFNg_SL1344	ENST00000344086	rs6686750	942	2.83216e-22	4.74884e-21	0.00731038	0.121706	0.870983	3.24745e-10	1.47e-25	rs6686750	rs12126142	0.99269	0.877398	IL6	IL6R
Ensembl_87	MCH	naive	ENST00000395693	rs131805	1184	0.0188487	0.00252893	0.777393	0.104206	0.0970234	0.000202059	5.76e-08	rs115812126	rs140522	0.201229	0.482154	MCH	SCO2
Ensembl_87	MCH	naive	ENST00000252785	rs140522	1172	0.0180148	0.00268352	0.742999	0.110553	0.12575	4.80129e-05	5.76e-08	rs5770893	rs140522	0.236303	0.532157	MCH	SCO2
Ensembl_87	MCH	IFNg	ENST00000395693	rs131805	1184	4.12699e-05	0.00806672	0.00170213	0.332045	0.658145	1.24097e-17	5.76e-08	rs131813	rs140522	0.99019	0.664666	MCH	SCO2
Ensembl_87	MCH	IFNg	ENST00000252785	rs140522	1172	8.8058e-05	0.000274178	0.00363185	0.0103224	0.985683	4.67664e-10	5.76e-08	rs140522	rs140522	0.996006	0.989636	MCH	SCO2
Ensembl_87	MCH	SL1344	ENST00000395693	rs131805	1184	0.00116355	0.00194369	0.0479892	0.0792955	0.869608	3.04283e-09	5.76e-08	rs131813	rs140522	0.948904	0.916435	MCH	SCO2
Ensembl_87	MCH	SL1344	ENST00000252785	rs140522	1172	0.000822963	0.000677741	0.0339421	0.0270151	0.937542	1.15632e-07	5.76e-08	rs140522	rs140522	0.964557	0.971992	MCH	SCO2
Ensembl_87	MCH	IFNg_SL1344	ENST00000395693	rs131805	1184	0.00055775	0.0012353	0.0230038	0.0500233	0.92518	9.19788e-10	5.76e-08	rs131816	rs140522	0.975203	0.948705	MCH	SCO2
Ensembl_87	MCH	IFNg_SL1344	ENST00000252785	rs140522	1172	5.16554e-05	0.000342895	0.00213046	0.013158	0.984317	8.44555e-11	5.76e-08	rs140522	rs140522	0.997475	0.986809	MCH	SCO2
Ensembl_87	MCH	naive	ENST00000259727	rs4716056	882	0.000600145	4.99799e-05	0.863113	0.0718153	0.0644218	0.00221237	1.83e-09	rs6909231	rs6914805	0.136237	0.472865	MCH	GMPR
Ensembl_87	MCH	IFNg	ENST00000259727	rs4716056	882	0.000563249	5.82507e-05	0.81005	0.083669	0.105659	0.00558199	1.83e-09	rs4716060	rs6914805	0.189328	0.558074	MCH	GMPR
Ensembl_87	MCH	SL1344	ENST00000259727	rs4716056	882	5.76073e-05	3.79295e-05	0.0828494	0.0536858	0.863369	1.82313e-07	1.83e-09	rs4716056	rs6914805	0.917055	0.941458	MCH	GMPR
Ensembl_87	MCH	IFNg_SL1344	ENST00000259727	rs4716056	882	2.71988e-05	2.63008e-05	0.0391165	0.0369012	0.923929	1.18901e-07	1.83e-09	rs4716056	rs6914805	0.96083	0.961594	MCH	GMPR
Ensembl_87	MCV	naive	ENST00000395693	rs131805	1184	0.000574197	7.70401e-05	0.798914	0.107097	0.0933374	0.000202059	2.31e-09	rs115812126	rs131787	0.200434	0.465675	MCV	SCO2
Ensembl_87	MCV	naive	ENST00000252785	rs140522	1172	0.000555948	8.2815e-05	0.773523	0.115115	0.110724	4.80129e-05	2.31e-09	rs5770893	rs131787	0.225838	0.490279	MCV	SCO2
Ensembl_87	MCV	IFNg	ENST00000395693	rs131805	1184	1.1807e-06	0.000230782	0.00164277	0.320422	0.677703	1.24097e-17	2.31e-09	rs131813	rs131787	0.998125	0.678976	MCV	SCO2
Ensembl_87	MCV	IFNg	ENST00000252785	rs140522	1172	3.64123e-06	1.13374e-05	0.00506626	0.0147942	0.980125	4.67664e-10	2.31e-09	rs140522	rs131787	0.994919	0.98513	MCV	SCO2
Ensembl_87	MCV	SL1344	ENST00000395693	rs131805	1184	4.86869e-05	8.13306e-05	0.0677409	0.11234	0.819789	3.04283e-09	2.31e-09	rs131813	rs131787	0.932129	0.87948	MCV	SCO2
Ensembl_87	MCV	SL1344	ENST00000252785	rs140522	1172	3.18936e-05	2.62656e-05	0.0443754	0.0356249	0.919942	1.15632e-07	2.31e-09	rs140522	rs131787	0.955566	0.962719	MCV	SCO2
Ensembl_87	MCV	IFNg_SL1344	ENST00000395693	rs131805	1184	2.20017e-05	4.87291e-05	0.0306123	0.0668972	0.90242	9.19788e-10	2.31e-09	rs131816	rs131787	0.969317	0.930985	MCV	SCO2
Ensembl_87	MCV	IFNg_SL1344	ENST00000252785	rs140522	1172	2.24144e-06	1.48789e-05	0.00311864	0.0197248	0.977139	8.44555e-11	2.31e-09	rs140522	rs131787	0.996864	0.980213	MCV	SCO2
Ensembl_87	PLT	naive	ENST00000526104	rs60884509	964	2.25516e-17	6.09393e-18	0.294668	0.0789991	0.626333	1.72341e-06	1e-21	rs60884509	rs11606108	0.705332	0.887997	PLT	RIC8A
Ensembl_87	PLT	naive	ENST00000526104	rs11606393	826	2.26306e-17	5.84723e-18	0.2957	0.0757735	0.628526	1.72341e-06	1e-21	rs60884509	rs11606108	0.7043	0.892413	PLT	RIC8A
Ensembl_87	PLT	IFNg	ENST00000526104	rs60884509	964	7.72757e-18	3.03126e-18	0.100971	0.0387473	0.860282	6.20824e-07	1e-21	rs11604127	rs11606108	0.899029	0.956901	PLT	RIC8A
Ensembl_87	PLT	IFNg	ENST00000526104	rs11606393	826	7.73749e-18	2.93688e-18	0.101101	0.0375129	0.861386	6.20824e-07	1e-21	rs11604127	rs11606108	0.898899	0.958268	PLT	RIC8A
Ensembl_87	PLT	SL1344	ENST00000526104	rs60884509	964	5.83073e-17	6.13247e-18	0.761865	0.0799709	0.158164	0.000626137	1e-21	rs1879845	rs11606108	0.238135	0.664179	PLT	RIC8A
Ensembl_87	PLT	SL1344	ENST00000526104	rs11606393	826	5.88329e-17	5.49792e-18	0.768732	0.0716782	0.15959	0.000626137	1e-21	rs1879845	rs11606108	0.231268	0.690065	PLT	RIC8A
Ensembl_87	PLT	IFNg_SL1344	ENST00000526104	rs60884509	964	5.37771e-17	5.61771e-18	0.702671	0.0731788	0.224151	0.00137399	1e-21	rs61997072	rs11606108	0.297329	0.75388	PLT	RIC8A
Ensembl_87	PLT	IFNg_SL1344	ENST00000526104	rs11606393	826	5.42209e-17	5.03249e-18	0.708469	0.0655303	0.226	0.00137399	1e-21	rs61997072	rs11606108	0.291531	0.77522	PLT	RIC8A
Ensembl_87	PLT	naive	ENST00000360743	rs12728001	693	1.10608e-05	0.00345596	0.000203787	0.0627401	0.933589	2.90104e-13	7.95e-07	rs351372	rs902289	0.996329	0.937029	PLT	ST7L
Ensembl_87	PLT	naive	ENST00000361846	rs12728001	693	3.2772e-05	0.00284173	0.000603801	0.0514117	0.94511	3.78774e-11	7.95e-07	rs351372	rs902289	0.996522	0.948409	PLT	ST7L
Ensembl_87	PLT	naive	ENST00000360743	rs2999158	760	1.10607e-05	0.00345581	0.000203821	0.0627488	0.933581	2.90104e-13	7.95e-07	rs351372	rs902289	0.996329	0.93702	PLT	ST7L
Ensembl_87	PLT	naive	ENST00000361846	rs7544663	716	3.27719e-05	0.0028418	0.000603803	0.0514133	0.945108	3.78774e-11	7.95e-07	rs351372	rs902289	0.996522	0.948407	PLT	ST7L
Ensembl_87	PLT	IFNg	ENST00000360743	rs12728001	693	2.54501e-05	0.00282748	0.000468901	0.0511487	0.945529	4.61698e-12	7.95e-07	rs351372	rs902289	0.996678	0.948681	PLT	ST7L
Ensembl_87	PLT	IFNg	ENST00000361846	rs12728001	693	1.5337e-05	0.00318899	0.000282574	0.0578161	0.938697	6.03839e-13	7.95e-07	rs351372	rs902289	0.996513	0.941982	PLT	ST7L
Ensembl_87	PLT	IFNg	ENST00000360743	rs2999158	760	2.54516e-05	0.00282423	0.000469012	0.0510982	0.945583	4.61698e-12	7.95e-07	rs351372	rs902289	0.996681	0.948732	PLT	ST7L
Ensembl_87	PLT	IFNg	ENST00000361846	rs7544663	716	1.5337e-05	0.00318904	0.000282575	0.0578174	0.938696	6.03839e-13	7.95e-07	rs351372	rs902289	0.996513	0.94198	PLT	ST7L
Ensembl_87	PLT	SL1344	ENST00000360743	rs12728001	693	0.0123451	0.00526113	0.227449	0.0962739	0.658671	4.2311e-07	7.95e-07	rs2999158	rs902289	0.754945	0.872476	PLT	ST7L
Ensembl_87	PLT	SL1344	ENST00000361846	rs12728001	693	0.0170557	0.00457238	0.31424	0.0836623	0.58047	3.45711e-05	7.95e-07	rs3013431	rs902289	0.664132	0.874028	PLT	ST7L
Ensembl_87	PLT	SL1344	ENST00000360743	rs2999158	760	0.0124663	0.00480418	0.229724	0.0878643	0.665141	4.2311e-07	7.95e-07	rs2999158	rs902289	0.753005	0.883315	PLT	ST7L
Ensembl_87	PLT	SL1344	ENST00000361846	rs7544663	716	0.0170451	0.00460159	0.314045	0.0842014	0.580107	3.45711e-05	7.95e-07	rs3013431	rs902289	0.664309	0.87325	PLT	ST7L
Ensembl_87	PLT	IFNg_SL1344	ENST00000360743	rs12728001	693	0.044545	0.00273906	0.820711	0.0503836	0.0816215	0.0163564	7.95e-07	rs11102484	rs902289	0.132005	0.618321	PLT	ST7L
Ensembl_87	PLT	IFNg_SL1344	ENST00000361846	rs12728001	693	0.00297722	0.00316233	0.0548532	0.0573821	0.881625	1.29678e-06	7.95e-07	rs7544663	rs902289	0.939007	0.938891	PLT	ST7L
Ensembl_87	PLT	IFNg_SL1344	ENST00000360743	rs2999158	760	0.0442716	0.00302946	0.81582	0.0557446	0.0811343	0.0130927	7.95e-07	rs115760253	rs902289	0.136879	0.592745	PLT	ST7L
Ensembl_87	PLT	IFNg_SL1344	ENST00000361846	rs7544663	716	0.00297688	0.00316787	0.0548472	0.0574847	0.881523	1.29678e-06	7.95e-07	rs7544663	rs902289	0.939008	0.938782	PLT	ST7L
Ensembl_87	TC	naive	ENST00000445832	rs2264778	1389	0.0691826	0.00941931	0.757213	0.103035	0.0611504	0.00342456	7.67e-07	rs146012491	rs1169314	0.164185	0.372448	TC	C12orf43
Ensembl_87	TC	IFNg	ENST00000445832	rs2264778	1389	0.0635248	0.0103513	0.695288	0.113179	0.117657	0.000204225	7.67e-07	rs2071190	rs1169314	0.230836	0.509701	TC	C12orf43
Ensembl_87	TC	SL1344	ENST00000445832	rs2264778	1389	0.0112788	0.00654324	0.123448	0.0708288	0.787901	1.45808e-06	7.67e-07	rs2264778	rs1169314	0.858729	0.917519	TC	C12orf43
Ensembl_87	TC	IFNg_SL1344	ENST00000445832	rs2264778	1389	0.0680396	0.0101335	0.744703	0.110846	0.0662782	0.000709641	7.67e-07	rs45555142	rs1169314	0.177124	0.37419	TC	C12orf43
Ensembl_87	TC	naive	ENST00000343975	rs3846662	788	2.26572e-15	3.82432e-14	0.00225396	0.037084	0.960662	3.32708e-11	3.83e-18	rs3846662	rs12916	0.997746	0.962832	TC	HMGCR
Ensembl_87	TC	naive	ENST00000343975	rs35760935	726	2.25695e-15	4.19623e-14	0.0022453	0.0407886	0.956966	3.32708e-11	3.83e-18	rs3846662	rs12916	0.997755	0.95912	TC	HMGCR
Ensembl_87	TC	naive	ENST00000287936	rs12916	784	5.30036e-13	8.49595e-14	0.527284	0.0841298	0.388586	0.000228384	3.83e-18	rs10942734	rs12916	0.472716	0.822029	TC	HMGCR
Ensembl_87	TC	IFNg	ENST00000343975	rs3846662	788	1.16969e-13	7.88423e-14	0.116362	0.0776269	0.806011	9.2223e-08	3.83e-18	rs35760935	rs12916	0.883638	0.912151	TC	HMGCR
Ensembl_87	TC	IFNg	ENST00000343975	rs35760935	726	1.16563e-13	8.20307e-14	0.115961	0.0808038	0.803235	9.2223e-08	3.83e-18	rs35760935	rs12916	0.884039	0.908597	TC	HMGCR
Ensembl_87	TC	IFNg	ENST00000287936	rs12916	784	6.92907e-13	7.72271e-14	0.68931	0.076592	0.234098	5.78811e-05	3.83e-18	rs185945954	rs12916	0.31069	0.753478	TC	HMGCR
Ensembl_87	TC	SL1344	ENST00000343975	rs3846662	788	7.45314e-13	7.05948e-14	0.741444	0.0700398	0.188516	0.00315979	3.83e-18	rs1115091	rs12916	0.258556	0.729111	TC	HMGCR
Ensembl_87	TC	SL1344	ENST00000343975	rs35760935	726	7.46404e-13	6.91996e-14	0.742549	0.0686534	0.188798	0.00315979	3.83e-18	rs1115091	rs12916	0.257451	0.733334	TC	HMGCR
Ensembl_87	TC	SL1344	ENST00000287936	rs12916	784	6.0317e-13	9.73185e-14	0.600039	0.0965098	0.303451	0.000191885	3.83e-18	rs72302103	rs12916	0.399961	0.758702	TC	HMGCR
Ensembl_87	TC	IFNg_SL1344	ENST00000343975	rs3846662	788	3.11254e-13	7.01016e-14	0.309638	0.0691164	0.621246	5.1354e-05	3.83e-18	rs12916	rs12916	0.690362	0.899884	TC	HMGCR
Ensembl_87	TC	IFNg_SL1344	ENST00000343975	rs35760935	726	3.09938e-13	7.40349e-14	0.308337	0.0730339	0.618629	5.1354e-05	3.83e-18	rs12916	rs12916	0.691663	0.894408	TC	HMGCR
Ensembl_87	TC	IFNg_SL1344	ENST00000287936	rs12916	784	7.27454e-14	3.4167e-14	0.0723677	0.033095	0.894537	5.92426e-07	3.83e-18	rs12916	rs12916	0.927632	0.964323	TC	HMGCR
Ensembl_87	TG	naive	ENST00000434152	rs157580	849	2.77941e-25	3.58418e-26	0.520966	0.0667687	0.412266	2.01762e-06	7.71e-31	rs157580	rs439401	0.479034	0.860618	TG	APOE
Ensembl_87	TG	naive	ENST00000434152	rs440446	888	2.77497e-25	3.66371e-26	0.520133	0.06826	0.411607	2.01762e-06	7.71e-31	rs157580	rs439401	0.479867	0.857752	TG	APOE
Ensembl_87	TG	IFNg	ENST00000434152	rs157580	849	8.74765e-28	1.31818e-26	0.00163964	0.023733	0.974627	1.90887e-12	7.71e-31	rs440446	rs439401	0.99836	0.976228	TG	APOE
Ensembl_87	TG	IFNg	ENST00000434152	rs440446	888	8.7476e-28	1.31847e-26	0.00163963	0.0237384	0.974622	1.90887e-12	7.71e-31	rs440446	rs439401	0.99836	0.976223	TG	APOE
Ensembl_87	TG	SL1344	ENST00000434152	rs157580	849	1.93655e-25	1.70146e-25	0.362982	0.318599	0.318419	1.09186e-09	7.71e-31	rs440446	rs439401	0.637018	0.499858	TG	APOE
Ensembl_87	TG	SL1344	ENST00000434152	rs440446	888	1.93372e-25	1.70677e-25	0.362452	0.319595	0.317953	1.09186e-09	7.71e-31	rs440446	rs439401	0.637548	0.498712	TG	APOE
Ensembl_87	TG	IFNg_SL1344	ENST00000434152	rs157580	849	3.19281e-25	7.1192e-26	0.598452	0.133172	0.268376	3.59673e-07	7.71e-31	rs440446	rs439401	0.401548	0.668354	TG	APOE
Ensembl_87	TG	IFNg_SL1344	ENST00000434152	rs440446	888	3.17702e-25	7.34779e-26	0.595493	0.137458	0.267049	3.59673e-07	7.71e-31	rs440446	rs439401	0.404507	0.660184	TG	APOE
Ensembl_87	WBC	naive	ENST00000339082	rs4760	1130	0.0164032	0.00322024	0.0509463	0.00908135	0.920349	9.71313e-10	4.47e-07	rs4760	rs4760	0.92943	0.990229	WBC	PLAUR
Ensembl_87	WBC	IFNg	ENST00000339082	rs4760	1130	0.103648	0.0145026	0.32192	0.0445281	0.5154	5.776e-06	4.47e-07	rs4760	rs4760	0.559929	0.920475	WBC	PLAUR
Ensembl_87	WBC	SL1344	ENST00000339082	rs4760	1130	0.183903	0.0253747	0.571184	0.0786701	0.140868	0.00254317	4.47e-07	rs349039	rs4760	0.219538	0.641656	WBC	PLAUR
Ensembl_87	WBC	IFNg_SL1344	ENST00000339082	rs4760	1130	0.16961	0.0194951	0.526789	0.0603259	0.22378	0.000763432	4.47e-07	rs4760	rs4760	0.284106	0.787664	WBC	PLAUR
Ensembl_87	LDL	naive	ENST00000343975	rs3846662	788	7.08897e-15	1.19655e-13	0.00116852	0.0187435	0.980088	3.32708e-11	9.47e-18	rs3846662	rs12916	0.998831	0.981235	LDL	HMGCR
Ensembl_87	LDL	naive	ENST00000343975	rs35760935	726	7.07452e-15	1.31533e-13	0.00116624	0.0207052	0.978129	3.32708e-11	9.47e-18	rs3846662	rs12916	0.998834	0.979271	LDL	HMGCR
Ensembl_87	LDL	naive	ENST00000287936	rs12916	784	3.03832e-12	4.87012e-13	0.500827	0.0798582	0.419315	0.000228384	9.47e-18	rs10942734	rs12916	0.499173	0.840019	LDL	HMGCR
Ensembl_87	LDL	IFNg	ENST00000343975	rs3846662	788	5.68365e-13	3.83102e-13	0.0936875	0.0623053	0.844007	9.2223e-08	9.47e-18	rs35760935	rs12916	0.906312	0.931254	LDL	HMGCR
Ensembl_87	LDL	IFNg	ENST00000343975	rs35760935	726	5.66748e-13	3.98845e-13	0.0934292	0.0649085	0.841662	9.2223e-08	9.47e-18	rs35760935	rs12916	0.906571	0.928402	LDL	HMGCR
Ensembl_87	LDL	IFNg	ENST00000287936	rs12916	784	4.18166e-12	4.66061e-13	0.689291	0.07659	0.234119	5.78811e-05	9.47e-18	rs185945954	rs12916	0.310709	0.753499	LDL	HMGCR
Ensembl_87	LDL	SL1344	ENST00000343975	rs3846662	788	4.3312e-12	4.10244e-13	0.713942	0.0674046	0.218654	0.00315979	9.47e-18	rs1115091	rs12916	0.286058	0.764368	LDL	HMGCR
Ensembl_87	LDL	SL1344	ENST00000343975	rs35760935	726	4.33704e-12	4.02089e-13	0.714967	0.066066	0.218967	0.00315979	9.47e-18	rs1115091	rs12916	0.285033	0.768217	LDL	HMGCR
Ensembl_87	LDL	SL1344	ENST00000287936	rs12916	784	3.45347e-12	5.572e-13	0.569259	0.0915079	0.339233	0.000191885	9.47e-18	rs72302103	rs12916	0.430741	0.787557	LDL	HMGCR
Ensembl_87	LDL	IFNg_SL1344	ENST00000343975	rs3846662	788	1.52502e-12	3.4347e-13	0.251379	0.0559238	0.692697	5.1354e-05	9.47e-18	rs12916	rs12916	0.748621	0.925298	LDL	HMGCR
Ensembl_87	LDL	IFNg_SL1344	ENST00000343975	rs35760935	726	1.51973e-12	3.63017e-13	0.250529	0.0591536	0.690317	5.1354e-05	9.47e-18	rs12916	rs12916	0.749471	0.921073	LDL	HMGCR
Ensembl_87	LDL	IFNg_SL1344	ENST00000287936	rs12916	784	2.928e-13	1.37522e-13	0.0482641	0.0217386	0.929997	5.92426e-07	9.47e-18	rs12916	rs12916	0.951736	0.977159	LDL	HMGCR
Ensembl_87	CAD_2017	naive	ENST00000452243	rs1894400	993	4.23262e-15	2.63935e-09	1.79824e-08	0.0102236	0.989776	8.70687e-22	6.279e-13	rs1894400	rs11330240	1	0.989776	CAD	FES
Ensembl_87	CAD_2017	IFNg	ENST00000452243	rs1894400	993	5.28131e-13	3.33251e-09	2.24378e-06	0.0131714	0.986826	3.20523e-17	6.279e-13	rs1894400	rs11330240	0.999998	0.986829	CAD	FES
Ensembl_87	CAD_2017	SL1344	ENST00000452243	rs1894400	993	7.93696e-08	1.1214e-08	0.337204	0.047027	0.615769	8.56669e-05	6.279e-13	rs1894400	rs11330240	0.662796	0.929048	CAD	FES
Ensembl_87	CAD_2017	IFNg_SL1344	ENST00000452243	rs1894400	993	1.89936e-07	1.77703e-08	0.806948	0.07538	0.117672	0.00388713	6.279e-13	rs113025169	rs11330240	0.193052	0.609535	CAD	FES
Ensembl_87	CAD_2017	naive	ENST00000309042	rs3796529	1334	0.000443632	0.000358366	0.0638518	0.0506949	0.884651	5.3472e-08	6.961e-08	rs3796529	rs17087335	0.935346	0.945801	CAD	REST
Ensembl_87	CAD_2017	IFNg	ENST00000309042	rs3796529	1334	0.00535622	0.000715241	0.77092	0.102824	0.120184	0.00872868	6.961e-08	rs11728518	rs17087335	0.223009	0.538923	CAD	REST
Ensembl_87	CAD_2017	SL1344	ENST00000309042	rs3796529	1334	0.0054072	0.000686566	0.778258	0.0987003	0.116948	0.0027538	6.961e-08	rs66574323	rs17087335	0.215648	0.542309	CAD	REST
Ensembl_87	CAD_2017	IFNg_SL1344	ENST00000309042	rs3796529	1334	0.00475633	0.00109123	0.684577	0.156908	0.152668	3.49582e-05	6.961e-08	rs62308101	rs17087335	0.309576	0.493151	CAD	REST
Ensembl_87	CAD_2017	naive	ENST00000618091	rs2070737	886	8.38653e-10	0.00364435	1.11141e-08	0.047347	0.949009	7.84614e-22	2.698e-07	rs35302007	rs1964272	0.996356	0.95248	CAD	DMPK
Ensembl_87	CAD_2017	naive	ENST00000618091	rs10688606;rs35902819;rs375227098	924	8.38651e-10	0.00364434	1.11147e-08	0.0473495	0.949006	7.84614e-22	2.698e-07	rs35302007	rs1964272	0.996356	0.952477	CAD	DMPK
Ensembl_87	CAD_2017	naive	ENST00000618091	rs7252126	924	8.38651e-10	0.00364434	1.11147e-08	0.0473495	0.949006	7.84614e-22	2.698e-07	rs35302007	rs1964272	0.996356	0.952477	CAD	DMPK
Ensembl_87	CAD_2017	IFNg	ENST00000618091	rs2070737	886	1.64699e-06	0.00396984	2.18264e-05	0.0516652	0.944341	1.27796e-14	2.698e-07	rs10688606;rs35902819;rs375227098	rs1964272	0.996007	0.948128	CAD	DMPK
Ensembl_87	CAD_2017	IFNg	ENST00000618091	rs10688606;rs35902819;rs375227098	924	1.64698e-06	0.00396983	2.18275e-05	0.0516678	0.944339	1.27796e-14	2.698e-07	rs10688606;rs35902819;rs375227098	rs1964272	0.996007	0.948125	CAD	DMPK
Ensembl_87	CAD_2017	IFNg	ENST00000618091	rs7252126	924	1.64698e-06	0.00396983	2.18275e-05	0.0516678	0.944339	1.27796e-14	2.698e-07	rs10688606;rs35902819;rs375227098	rs1964272	0.996007	0.948125	CAD	DMPK
Ensembl_87	CAD_2017	SL1344	ENST00000618091	rs2070737	886	1.32026e-06	0.00417272	1.74965e-05	0.0543567	0.941452	5.60971e-15	2.698e-07	rs7252126	rs1964272	0.995808	0.945415	CAD	DMPK
Ensembl_87	CAD_2017	SL1344	ENST00000618091	rs10688606;rs35902819;rs375227098	924	1.32025e-06	0.0041727	1.74974e-05	0.0543595	0.941449	5.60971e-15	2.698e-07	rs7252126	rs1964272	0.995808	0.945412	CAD	DMPK
Ensembl_87	CAD_2017	SL1344	ENST00000618091	rs7252126	924	1.32025e-06	0.0041727	1.74974e-05	0.0543595	0.941449	5.60971e-15	2.698e-07	rs7252126	rs1964272	0.995808	0.945412	CAD	DMPK
Ensembl_87	CAD_2017	IFNg_SL1344	ENST00000618091	rs2070737	886	3.93389e-05	0.00513775	0.000521331	0.0671599	0.927142	1.54073e-11	2.698e-07	rs7252126	rs1964272	0.994302	0.932455	CAD	DMPK
Ensembl_87	CAD_2017	IFNg_SL1344	ENST00000618091	rs10688606;rs35902819;rs375227098	924	3.93387e-05	0.00513775	0.000521357	0.0671635	0.927138	1.54073e-11	2.698e-07	rs7252126	rs1964272	0.994302	0.932452	CAD	DMPK
Ensembl_87	CAD_2017	IFNg_SL1344	ENST00000618091	rs7252126	924	3.93387e-05	0.00513775	0.000521357	0.0671635	0.927138	1.54073e-11	2.698e-07	rs7252126	rs1964272	0.994302	0.932452	CAD	DMPK
Ensembl_87	CAD_2017	naive	ENST00000257570	rs138493328;rs34867915	1226	0.00491705	0.00055132	0.811576	0.0909052	0.0920503	0.00889445	6.462e-09	rs201214067	rs2244608	0.182956	0.50313	CAD	OASL
Ensembl_87	CAD_2017	IFNg	ENST00000257570	rs138493328;rs34867915	1226	0.00494637	0.000708112	0.816416	0.116815	0.0611148	0.00228948	6.462e-09	rs10774574	rs2244608	0.17793	0.343477	CAD	OASL
Ensembl_87	CAD_2017	SL1344	ENST00000257570	rs138493328;rs34867915	1226	0.000193655	0.000412313	0.0319634	0.0671534	0.900277	3.01108e-09	6.462e-09	rs138493328;rs34867915	rs2244608	0.967431	0.930586	CAD	OASL
Ensembl_87	CAD_2017	IFNg_SL1344	ENST00000257570	rs138493328;rs34867915	1226	0.000788367	0.000523161	0.130123	0.0855664	0.782999	1.40521e-07	6.462e-09	rs138493328;rs34867915	rs2244608	0.868566	0.901485	CAD	OASL
Ensembl_87	CAD_2017	naive	ENST00000456827	rs146480536	874	5.25921e-14	3.22077e-14	0.016688	0.00924574	0.974066	3.92112e-09	5.09e-16	rs146480536	rs2246942	0.983312	0.990597	CAD	LIPA
Ensembl_87	CAD_2017	naive	ENST00000456827	rs1332329	878	5.25917e-14	3.22266e-14	0.0166879	0.00925176	0.97406	3.92112e-09	5.09e-16	rs146480536	rs2246942	0.983312	0.990591	CAD	LIPA
Ensembl_87	CAD_2017	naive	ENST00000456827	rs2246833	877	5.25918e-14	3.22221e-14	0.0166879	0.00925031	0.974062	3.92112e-09	5.09e-16	rs146480536	rs2246942	0.983312	0.990593	CAD	LIPA
Ensembl_87	CAD_2017	IFNg	ENST00000456827	rs146480536	874	1.15786e-14	2.28607e-14	0.00367402	0.00626385	0.990062	1.94375e-09	5.09e-16	rs1332329	rs2246942	0.996326	0.993713	CAD	LIPA
Ensembl_87	CAD_2017	IFNg	ENST00000456827	rs1332329	878	1.15786e-14	2.28621e-14	0.00367401	0.0062643	0.990062	1.94375e-09	5.09e-16	rs1332329	rs2246942	0.996326	0.993713	CAD	LIPA
Ensembl_87	CAD_2017	IFNg	ENST00000456827	rs2246833	877	1.15786e-14	2.28619e-14	0.00367401	0.00626424	0.990062	1.94375e-09	5.09e-16	rs1332329	rs2246942	0.996326	0.993713	CAD	LIPA
Ensembl_87	CAD_2017	SL1344	ENST00000456827	rs146480536	874	1.27529e-16	2.85539e-14	4.04662e-05	0.00806854	0.991891	2.87351e-14	5.09e-16	rs2246833	rs2246942	0.99996	0.991931	CAD	LIPA
Ensembl_87	CAD_2017	SL1344	ENST00000456827	rs1332329	878	1.27529e-16	2.85539e-14	4.04662e-05	0.00806854	0.991891	2.87351e-14	5.09e-16	rs2246833	rs2246942	0.99996	0.991931	CAD	LIPA
Ensembl_87	CAD_2017	SL1344	ENST00000456827	rs2246833	877	1.27529e-16	2.85539e-14	4.04662e-05	0.00806854	0.991891	2.87351e-14	5.09e-16	rs2246833	rs2246942	0.99996	0.991931	CAD	LIPA
Ensembl_87	CAD_2017	IFNg_SL1344	ENST00000456827	rs146480536	874	7.81339e-16	2.36451e-14	0.000247926	0.00650959	0.993242	2.1795e-12	5.09e-16	rs146480536	rs2246942	0.999752	0.993489	CAD	LIPA
Ensembl_87	CAD_2017	IFNg_SL1344	ENST00000456827	rs1332329	878	7.81338e-16	2.3646e-14	0.000247926	0.00650985	0.993242	2.1795e-12	5.09e-16	rs146480536	rs2246942	0.999752	0.993489	CAD	LIPA
Ensembl_87	CAD_2017	IFNg_SL1344	ENST00000456827	rs2246833	877	7.81338e-16	2.36459e-14	0.000247926	0.00650984	0.993242	2.1795e-12	5.09e-16	rs146480536	rs2246942	0.999752	0.993489	CAD	LIPA
Ensembl_87	CAD_2017	naive	ENST00000491598	rs12703513	704	0.00277119	0.00199769	0.0307437	0.0212191	0.943268	1.89815e-10	4.881e-07	rs12703513	rs2286198	0.964487	0.978	CAD	PARP12
Ensembl_87	CAD_2017	naive	ENST00000491598	rs2269996	708	0.0027712	0.00199746	0.0307446	0.0212173	0.943269	1.89815e-10	4.881e-07	rs12703513	rs2286198	0.964487	0.978001	CAD	PARP12
Ensembl_87	CAD_2017	naive	ENST00000491598	rs142432643	699	0.00277124	0.00199654	0.0307426	0.0212052	0.943284	1.89815e-10	4.881e-07	rs12703513	rs2286198	0.96449	0.978014	CAD	PARP12
Ensembl_87	CAD_2017	IFNg	ENST00000491598	rs12703513	704	9.64663e-05	0.00172387	0.0010702	0.0181457	0.978964	5.15748e-14	4.881e-07	rs757835	rs2286198	0.997109	0.981802	CAD	PARP12
Ensembl_87	CAD_2017	IFNg	ENST00000491598	rs2269996	708	9.64662e-05	0.00172392	0.00107023	0.0181468	0.978963	5.15748e-14	4.881e-07	rs757835	rs2286198	0.997109	0.981801	CAD	PARP12
Ensembl_87	CAD_2017	IFNg	ENST00000491598	rs142432643	699	9.64663e-05	0.00172391	0.00107014	0.0181452	0.978964	5.15748e-14	4.881e-07	rs757835	rs2286198	0.997109	0.981802	CAD	PARP12
Ensembl_87	CAD_2017	SL1344	ENST00000491598	rs12703513	704	0.000271478	0.00204462	0.00301178	0.0217101	0.972962	7.88082e-13	4.881e-07	rs142432643	rs2286198	0.994672	0.978174	CAD	PARP12
Ensembl_87	CAD_2017	SL1344	ENST00000491598	rs2269996	708	0.000271477	0.00204468	0.00301186	0.0217114	0.972961	7.88082e-13	4.881e-07	rs142432643	rs2286198	0.994672	0.978172	CAD	PARP12
Ensembl_87	CAD_2017	SL1344	ENST00000491598	rs142432643	699	0.000271478	0.00204449	0.00301163	0.0217075	0.972965	7.88082e-13	4.881e-07	rs142432643	rs2286198	0.994672	0.978176	CAD	PARP12
Ensembl_87	CAD_2017	IFNg_SL1344	ENST00000491598	rs12703513	704	5.14861e-05	0.00192386	0.000571188	0.0203663	0.977087	5.51826e-15	4.881e-07	rs757835	rs2286198	0.997453	0.979582	CAD	PARP12
Ensembl_87	CAD_2017	IFNg_SL1344	ENST00000491598	rs2269996	708	5.14861e-05	0.00192387	0.000571204	0.020367	0.977086	5.51826e-15	4.881e-07	rs757835	rs2286198	0.997453	0.979581	CAD	PARP12
Ensembl_87	CAD_2017	IFNg_SL1344	ENST00000491598	rs142432643	699	5.14861e-05	0.00192389	0.000571159	0.0203655	0.977088	5.51826e-15	4.881e-07	rs757835	rs2286198	0.997453	0.979582	CAD	PARP12
Ensembl_87	CAD_2017	naive	ENST00000344086	rs11265613	853	2.83161e-08	3.85026e-05	0.000393153	0.534121	0.465447	9.76857e-15	2.992e-10	rs11265613	rs6689306	0.999568	0.465648	CAD	IL6R
Ensembl_87	CAD_2017	naive	ENST00000344086	rs6686750	849	2.83161e-08	3.85026e-05	0.000393153	0.534121	0.465447	9.76857e-15	2.992e-10	rs11265613	rs6689306	0.999568	0.465648	CAD	IL6R
Ensembl_87	CAD_2017	IFNg	ENST00000344086	rs11265613	853	1.10505e-08	5.80808e-05	0.000153429	0.806225	0.193564	3.69239e-16	2.992e-10	rs11265613	rs6689306	0.999788	0.193604	CAD	IL6R
Ensembl_87	CAD_2017	IFNg	ENST00000344086	rs6686750	849	1.10505e-08	5.80808e-05	0.000153429	0.806225	0.193564	3.69239e-16	2.992e-10	rs11265613	rs6689306	0.999788	0.193605	CAD	IL6R
Ensembl_87	CAD_2017	SL1344	ENST00000344086	rs11265613	853	2.58309e-05	7.48763e-06	0.358647	0.103424	0.537896	2.44841e-05	2.992e-10	rs12126142	rs6689306	0.641319	0.838733	CAD	IL6R
Ensembl_87	CAD_2017	SL1344	ENST00000344086	rs6686750	849	2.58339e-05	7.48003e-06	0.35869	0.103318	0.537959	2.44841e-05	2.992e-10	rs12126142	rs6689306	0.641277	0.838887	CAD	IL6R
Ensembl_87	CAD_2017	IFNg_SL1344	ENST00000344086	rs11265613	853	1.90404e-07	3.10637e-06	0.00264366	0.042175	0.955178	3.24745e-10	2.992e-10	rs6686750	rs6689306	0.997353	0.957713	CAD	IL6R
Ensembl_87	CAD_2017	IFNg_SL1344	ENST00000344086	rs6686750	849	1.90404e-07	3.10632e-06	0.00264366	0.0421744	0.955179	3.24745e-10	2.992e-10	rs6686750	rs6689306	0.997353	0.957714	CAD	IL6R
txrevise_contained	AD	naive	ENSG00000105383.grp_1.contained.ENST00000436584	rs12459419	802	1.17778e-10	5.41587e-05	5.57758e-09	0.0015664	0.998379	1.00373e-23	5.12e-08	rs3865444	rs3865444	0.999946	0.998434	AD	CD33
txrevise_contained	AD	naive	ENSG00000105383.grp_1.contained.ENST00000391796	rs34912427	806	1.64579e-10	5.41334e-05	7.79364e-09	0.00156511	0.998381	2.22974e-23	5.12e-08	rs3865444	rs3865444	0.999946	0.998435	AD	CD33
txrevise_contained	AD	naive	ENSG00000105383.grp_1.contained.ENST00000391796	rs12459419	802	1.64579e-10	5.41334e-05	7.7939e-09	0.0015652	0.998381	2.22974e-23	5.12e-08	rs3865444	rs3865444	0.999946	0.998435	AD	CD33
txrevise_contained	AD	IFNg	ENSG00000105383.grp_1.contained.ENST00000436584	rs12459419	802	1.72209e-08	6.05992e-05	8.15524e-07	0.00187171	0.998067	1.17945e-18	5.12e-08	rs3865444	rs3865444	0.999939	0.998128	AD	CD33
txrevise_contained	AD	IFNg	ENSG00000105383.grp_1.contained.ENST00000391796	rs34912427	806	4.2608e-08	7.00536e-05	2.0177e-06	0.00231979	0.997608	9.96974e-18	5.12e-08	rs3865444	rs3865444	0.999928	0.99768	AD	CD33
txrevise_contained	AD	IFNg	ENSG00000105383.grp_1.contained.ENST00000391796	rs12459419	802	4.2608e-08	7.00536e-05	2.01777e-06	0.0023199	0.997608	9.96974e-18	5.12e-08	rs3865444	rs3865444	0.999928	0.99768	AD	CD33
txrevise_contained	AD	SL1344	ENSG00000105383.grp_1.contained.ENST00000436584	rs12459419	802	1.12046e-06	7.70075e-05	5.30614e-05	0.0026496	0.997219	5.23847e-15	5.12e-08	rs34912427	rs3865444	0.999869	0.99735	AD	CD33
txrevise_contained	AD	SL1344	ENSG00000105383.grp_1.contained.ENST00000391796	rs34912427	806	1.04236e-08	7.41751e-05	4.93612e-07	0.00251516	0.99741	3.15003e-19	5.12e-08	rs34912427	rs3865444	0.999925	0.997485	AD	CD33
txrevise_contained	AD	SL1344	ENSG00000105383.grp_1.contained.ENST00000391796	rs12459419	802	1.04236e-08	7.41751e-05	4.93628e-07	0.00251528	0.99741	3.15003e-19	5.12e-08	rs34912427	rs3865444	0.999925	0.997485	AD	CD33
txrevise_contained	AD	IFNg_SL1344	ENSG00000105383.grp_1.contained.ENST00000436584	rs12459419	802	3.31591e-08	6.47179e-05	1.57031e-06	0.00206696	0.997867	6.77818e-18	5.12e-08	rs3865444	rs3865444	0.999934	0.997933	AD	CD33
txrevise_contained	AD	IFNg_SL1344	ENSG00000105383.grp_1.contained.ENST00000391796	rs34912427	806	5.41128e-09	5.49876e-05	2.56251e-07	0.00160561	0.998339	8.20774e-20	5.12e-08	rs3865444	rs3865444	0.999945	0.998394	AD	CD33
txrevise_contained	AD	IFNg_SL1344	ENSG00000105383.grp_1.contained.ENST00000391796	rs12459419	802	5.41127e-09	5.49876e-05	2.5626e-07	0.00160569	0.998339	8.20774e-20	5.12e-08	rs3865444	rs3865444	0.999945	0.998394	AD	CD33
txrevise_contained	CD	naive	ENSG00000187796.grp_2.contained.ENST00000485975	rs4073153	817	9.74068e-15	8.08685e-16	0.819404	0.0679155	0.11268	0.00382738	4.37e-20	rs10870201	rs4077515	0.180596	0.623936	IBD	CARD9
txrevise_contained	CD	IFNg	ENSG00000187796.grp_2.contained.ENST00000485975	rs4073153	817	6.38231e-15	7.82486e-16	0.536892	0.0654265	0.397681	0.000869838	4.37e-20	rs3812565	rs4077515	0.463108	0.858723	IBD	CARD9
txrevise_contained	CD	SL1344	ENSG00000187796.grp_2.contained.ENST00000485975	rs4073153	817	2.01913e-15	6.44991e-16	0.169853	0.0534812	0.776666	1.80137e-06	4.37e-20	rs4073153	rs4077515	0.830147	0.935576	IBD	CARD9
txrevise_contained	CD	IFNg_SL1344	ENSG00000187796.grp_2.contained.ENST00000485975	rs4073153	817	7.0953e-15	8.23239e-16	0.59687	0.0689182	0.334212	0.000284677	4.37e-20	rs58783556	rs4077515	0.40313	0.829042	IBD	CARD9
txrevise_contained	CD	naive	ENSG00000079263.grp_1.contained.ENST00000343805	rs35540610	1459	0.000371064	5.9891e-05	0.781858	0.126103	0.0916082	0.00723976	1.116e-08	rs79247163	rs7423615	0.217711	0.420778	IBD	SP140
txrevise_contained	CD	IFNg	ENSG00000079263.grp_1.contained.ENST00000343805	rs35540610	1459	3.46846e-05	2.2242e-05	0.073083	0.0459847	0.880875	1.30616e-08	1.116e-08	rs35540610	rs7423615	0.92686	0.950387	IBD	SP140
txrevise_contained	CD	SL1344	ENSG00000079263.grp_1.contained.ENST00000343805	rs35540610	1459	0.00034392	5.15129e-05	0.724665	0.108375	0.166565	0.000367733	1.116e-08	rs35634793	rs7423615	0.27494	0.605823	IBD	SP140
txrevise_contained	CD	IFNg_SL1344	ENSG00000079263.grp_1.contained.ENST00000343805	rs35540610	1459	0.000117475	2.91295e-05	0.247528	0.0606863	0.69164	1.41934e-05	1.116e-08	rs13397985	rs7423615	0.752326	0.919335	IBD	SP140
txrevise_contained	CD	naive	ENSG00000004534.grp_1.contained.ENST00000442092	rs5848905	482	1.33914e-05	0.00700661	0.000330922	0.172324	0.820325	7.09091e-13	1.756e-07	rs34433151	rs7428430	0.992649	0.8264	IBD	RBM6
txrevise_contained	CD	IFNg	ENSG00000004534.grp_1.contained.ENST00000442092	rs5848905	482	0.000269071	0.00651375	0.00664919	0.160139	0.826429	8.37641e-10	1.756e-07	rs11130227	rs7428430	0.986568	0.837681	IBD	RBM6
txrevise_contained	CD	SL1344	ENSG00000004534.grp_1.contained.ENST00000442092	rs5848905	482	0.00625267	0.00440319	0.154514	0.108083	0.726747	2.17119e-06	1.756e-07	rs11130227	rs7428430	0.83483	0.870533	IBD	RBM6
txrevise_contained	CD	IFNg_SL1344	ENSG00000004534.grp_1.contained.ENST00000442092	rs5848905	482	0.00171722	0.00331814	0.0424353	0.0811253	0.871404	5.9916e-08	1.756e-07	rs5848905	rs7428430	0.952529	0.914832	IBD	RBM6
txrevise_contained	CD	naive	ENSG00000160752.grp_1.contained.ENST00000468479	rs7524950	376	5.65887e-09	4.11061e-05	1.11344e-05	0.0799601	0.919988	7.37113e-18	6.098e-09	rs4620533	rs7543234	0.999948	0.920036	IBD	FDPS
txrevise_contained	CD	naive	ENSG00000160752.grp_2.contained.ENST00000492887	rs7524950	376	1.77065e-08	6.02189e-05	3.48393e-05	0.117604	0.882301	3.90477e-17	6.098e-09	rs6692183	rs7543234	0.999905	0.882385	IBD	FDPS
txrevise_contained	CD	naive	ENSG00000160752.grp_2.contained.ENST00000492887	rs7534795	374	1.7684e-08	6.04257e-05	3.48313e-05	0.118136	0.881769	3.90477e-17	6.098e-09	rs6692183	rs7543234	0.999905	0.881853	IBD	FDPS
txrevise_contained	CD	naive	ENSG00000160752.grp_2.contained.ENST00000492887	rs2297480	369	1.76485e-08	6.09277e-05	3.48126e-05	0.119302	0.880602	3.90477e-17	6.098e-09	rs6692183	rs7543234	0.999904	0.880686	IBD	FDPS
txrevise_contained	CD	IFNg	ENSG00000160752.grp_1.contained.ENST00000468479	rs7524950	376	6.51544e-09	4.25333e-05	1.28197e-05	0.082771	0.917174	4.87766e-18	6.098e-09	rs4620533	rs7543234	0.999945	0.917224	IBD	FDPS
txrevise_contained	CD	IFNg	ENSG00000160752.grp_2.contained.ENST00000492887	rs7524950	376	2.5631e-09	4.65448e-05	5.04313e-06	0.0906721	0.909276	6.18157e-19	6.098e-09	rs4620533	rs7543234	0.999948	0.909323	IBD	FDPS
txrevise_contained	CD	IFNg	ENSG00000160752.grp_2.contained.ENST00000492887	rs7534795	374	2.56232e-09	4.65822e-05	5.04686e-06	0.0908413	0.909107	6.18157e-19	6.098e-09	rs4620533	rs7543234	0.999948	0.909154	IBD	FDPS
txrevise_contained	CD	IFNg	ENSG00000160752.grp_2.contained.ENST00000492887	rs2297480	369	2.56054e-09	4.67384e-05	5.05079e-06	0.0912851	0.908663	6.18157e-19	6.098e-09	rs4620533	rs7543234	0.999948	0.90871	IBD	FDPS
txrevise_contained	CD	SL1344	ENSG00000160752.grp_1.contained.ENST00000468479	rs7524950	376	7.48987e-06	5.31187e-05	0.014737	0.103635	0.881568	1.2772e-09	6.098e-09	rs4492610	rs7543234	0.985202	0.894809	IBD	FDPS
txrevise_contained	CD	SL1344	ENSG00000160752.grp_2.contained.ENST00000492887	rs7524950	376	6.64576e-09	4.33643e-05	1.30762e-05	0.0844077	0.915536	4.96004e-18	6.098e-09	rs7534795	rs7543234	0.999944	0.915588	IBD	FDPS
txrevise_contained	CD	SL1344	ENSG00000160752.grp_2.contained.ENST00000492887	rs7534795	374	6.64504e-09	4.33653e-05	1.30884e-05	0.0844988	0.915445	4.96004e-18	6.098e-09	rs7534795	rs7543234	0.999944	0.915496	IBD	FDPS
txrevise_contained	CD	SL1344	ENSG00000160752.grp_2.contained.ENST00000492887	rs2297480	369	6.64395e-09	4.33708e-05	1.31055e-05	0.0846358	0.915308	4.96004e-18	6.098e-09	rs7534795	rs7543234	0.999944	0.915359	IBD	FDPS
txrevise_contained	CD	IFNg_SL1344	ENSG00000160752.grp_1.contained.ENST00000468479	rs7524950	376	0.000222362	3.85745e-05	0.437519	0.0754122	0.486808	2.00345e-05	6.098e-09	rs12021631	rs7543234	0.56222	0.865867	IBD	FDPS
txrevise_contained	CD	IFNg_SL1344	ENSG00000160752.grp_2.contained.ENST00000492887	rs7524950	376	2.7732e-07	4.78428e-05	0.000545652	0.093229	0.906177	1.31522e-13	6.098e-09	rs2297480	rs7543234	0.999406	0.906716	IBD	FDPS
txrevise_contained	CD	IFNg_SL1344	ENSG00000160752.grp_2.contained.ENST00000492887	rs7534795	374	2.77274e-07	4.7857e-05	0.000546132	0.0933554	0.90605	1.31522e-13	6.098e-09	rs2297480	rs7543234	0.999406	0.906589	IBD	FDPS
txrevise_contained	CD	IFNg_SL1344	ENSG00000160752.grp_2.contained.ENST00000492887	rs2297480	369	2.77211e-07	4.78761e-05	0.000546812	0.0935322	0.905873	1.31522e-13	6.098e-09	rs2297480	rs7543234	0.999405	0.906412	IBD	FDPS
txrevise_contained	CD	naive	ENSG00000132676.grp_2.contained.ENST00000343043	1_155664768	302	0.000979648	0.000333349	0.259478	0.0876421	0.651567	8.38965e-06	6.81e-08	1_155664768	rs821551	0.739209	0.881438	IBD	DAP3
txrevise_contained	CD	naive	ENSG00000132676.grp_2.contained.ENST00000343043	rs12740629	304	0.00100284	0.000338801	0.260178	0.0872472	0.651234	8.38965e-06	6.81e-08	1_155664768	rs821551	0.738481	0.881856	IBD	DAP3
txrevise_contained	CD	IFNg	ENSG00000132676.grp_2.contained.ENST00000343043	1_155664768	302	0.000241238	0.000282649	0.0638963	0.0740034	0.861576	2.60119e-07	6.81e-08	rs201013882	rs821551	0.93558	0.920901	IBD	DAP3
txrevise_contained	CD	IFNg	ENSG00000132676.grp_2.contained.ENST00000343043	rs12740629	304	0.000243301	0.000284617	0.0631219	0.0729775	0.863373	2.60119e-07	6.81e-08	rs201013882	rs821551	0.93635	0.922062	IBD	DAP3
txrevise_contained	CD	SL1344	ENSG00000132676.grp_2.contained.ENST00000343043	1_155664768	302	0.000128532	0.000523488	0.0340442	0.137828	0.827476	6.78998e-09	6.81e-08	rs12740629	rs821551	0.965304	0.857218	IBD	DAP3
txrevise_contained	CD	SL1344	ENSG00000132676.grp_2.contained.ENST00000343043	rs12740629	304	0.000136007	0.000541459	0.0352856	0.139652	0.824385	6.78998e-09	6.81e-08	rs12740629	rs821551	0.964037	0.855139	IBD	DAP3
txrevise_contained	CD	IFNg_SL1344	ENSG00000132676.grp_2.contained.ENST00000343043	1_155664768	302	0.00131093	0.000273763	0.347226	0.071932	0.579258	1.69312e-06	6.81e-08	rs11264409	rs821551	0.65119	0.889538	IBD	DAP3
txrevise_contained	CD	IFNg_SL1344	ENSG00000132676.grp_2.contained.ENST00000343043	rs12740629	304	0.00132287	0.000279761	0.343205	0.0719978	0.583194	1.69312e-06	6.81e-08	rs11264409	rs821551	0.655192	0.890112	IBD	DAP3
txrevise_contained	IBD	naive	ENSG00000184110.grp_2.contained.ENST00000565099	rs4149394	337	2.75181e-08	3.17203e-06	0.00172754	0.198335	0.799934	1.43012e-11	2.783e-10	rs4149394	rs12446550	0.998269	0.801321	IBD	EIF3C
txrevise_contained	IBD	naive	ENSG00000184110.grp_2.contained.ENST00000565099	rs743590	336	2.75181e-08	3.17202e-06	0.00172755	0.198335	0.799934	1.43012e-11	2.783e-10	rs4149394	rs12446550	0.998269	0.801321	IBD	EIF3C
txrevise_contained	IBD	naive	ENSG00000184110.grp_2.contained.ENST00000565099	rs11339073	350	2.72239e-08	3.15237e-06	0.00176872	0.204013	0.794215	1.43012e-11	2.783e-10	rs4149394	rs12446550	0.998228	0.795625	IBD	EIF3C
txrevise_contained	IBD	IFNg	ENSG00000184110.grp_2.contained.ENST00000565099	rs4149394	337	5.01146e-08	2.43103e-06	0.00314612	0.151772	0.84508	7.74523e-10	2.783e-10	16_28518907	rs12446550	0.996851	0.847749	IBD	EIF3C
txrevise_contained	IBD	IFNg	ENSG00000184110.grp_2.contained.ENST00000565099	rs743590	336	5.01146e-08	2.43103e-06	0.00314612	0.151771	0.84508	7.74523e-10	2.783e-10	16_28518907	rs12446550	0.996851	0.847749	IBD	EIF3C
txrevise_contained	IBD	IFNg	ENSG00000184110.grp_2.contained.ENST00000565099	rs11339073	350	4.84441e-08	2.45642e-06	0.00314737	0.158753	0.838097	7.74523e-10	2.783e-10	16_28518907	rs12446550	0.99685	0.840745	IBD	EIF3C
txrevise_contained	IBD	SL1344	ENSG00000184110.grp_2.contained.ENST00000565099	rs4149394	337	1.54321e-09	1.60314e-06	9.68803e-05	0.0997427	0.900159	7.47511e-13	2.783e-10	rs11339073	rs12446550	0.999902	0.900248	IBD	EIF3C
txrevise_contained	IBD	SL1344	ENSG00000184110.grp_2.contained.ENST00000565099	rs743590	336	1.54321e-09	1.60314e-06	9.68803e-05	0.0997427	0.900159	7.47511e-13	2.783e-10	rs11339073	rs12446550	0.999902	0.900248	IBD	EIF3C
txrevise_contained	IBD	SL1344	ENSG00000184110.grp_2.contained.ENST00000565099	rs11339073	350	1.50338e-09	1.64659e-06	9.76734e-05	0.106084	0.893817	7.47511e-13	2.783e-10	rs11339073	rs12446550	0.999901	0.893905	IBD	EIF3C
txrevise_contained	IBD	IFNg_SL1344	ENSG00000184110.grp_2.contained.ENST00000565099	rs4149394	337	3.47523e-08	1.17618e-06	0.0021817	0.0729138	0.924903	8.44736e-10	2.783e-10	rs34835	rs12446550	0.997817	0.926927	IBD	EIF3C
txrevise_contained	IBD	IFNg_SL1344	ENSG00000184110.grp_2.contained.ENST00000565099	rs743590	336	3.47523e-08	1.17618e-06	0.0021817	0.0729136	0.924903	8.44736e-10	2.783e-10	rs34835	rs12446550	0.997817	0.926927	IBD	EIF3C
txrevise_contained	IBD	IFNg_SL1344	ENSG00000184110.grp_2.contained.ENST00000565099	rs11339073	350	3.43385e-08	1.19736e-06	0.00223095	0.0768707	0.920897	8.44736e-10	2.783e-10	rs34835	rs12446550	0.997768	0.922957	IBD	EIF3C
txrevise_contained	IBD	naive	ENSG00000138111.grp_1.contained.ENST00000450947	rs715440	686	1.27355e-05	0.0121189	0.000346035	0.328621	0.658901	2.14439e-14	9.37e-07	rs11191300	rs12572775	0.987522	0.667226	IBD	MFSD13A
txrevise_contained	IBD	IFNg	ENSG00000138111.grp_1.contained.ENST00000450947	rs715440	686	9.85183e-06	0.00338177	0.000267682	0.0909802	0.90536	3.24224e-12	9.37e-07	rs715440	rs12572775	0.996341	0.908686	IBD	MFSD13A
txrevise_contained	IBD	SL1344	ENSG00000138111.grp_1.contained.ENST00000450947	rs715440	686	0.0102668	0.00433002	0.278958	0.117061	0.589384	3.53137e-05	9.37e-07	rs11191299	rs12572775	0.706445	0.834296	IBD	MFSD13A
txrevise_contained	IBD	IFNg_SL1344	ENSG00000138111.grp_1.contained.ENST00000450947	rs715440	686	0.029384	0.0027001	0.798387	0.0732678	0.0962614	0.00204022	9.37e-07	rs11191293	rs12572775	0.169529	0.567816	IBD	MFSD13A
txrevise_contained	IBD	naive	ENSG00000175643.grp_2.contained.ENST00000572173	rs243314	1668	0.0178301	0.0026608	0.789206	0.117701	0.0726021	0.00215013	2.669e-07	rs880341	rs12598132	0.190303	0.381507	IBD	RMI2
txrevise_contained	IBD	naive	ENSG00000175643.grp_2.contained.ENST00000572173	rs7189239	1711	0.0177287	0.00276889	0.784804	0.1225	0.0721982	0.00215013	2.669e-07	rs880341	rs12598132	0.194698	0.370821	IBD	RMI2
txrevise_contained	IBD	IFNg	ENSG00000175643.grp_2.contained.ENST00000572173	rs243314	1668	0.000325496	0.00183213	0.0144073	0.0801916	0.903244	1.03007e-09	2.669e-07	rs243314	rs12598132	0.983435	0.918458	IBD	RMI2
txrevise_contained	IBD	IFNg	ENSG00000175643.grp_2.contained.ENST00000572173	rs7189239	1711	0.000325421	0.00183658	0.0144056	0.0803977	0.903035	1.03007e-09	2.669e-07	rs243314	rs12598132	0.983432	0.918248	IBD	RMI2
txrevise_contained	IBD	SL1344	ENSG00000175643.grp_2.contained.ENST00000572173	rs243314	1668	0.00474387	0.00215078	0.209976	0.0945102	0.688619	4.22169e-06	2.669e-07	rs7189239	rs12598132	0.78313	0.879317	IBD	RMI2
txrevise_contained	IBD	SL1344	ENSG00000175643.grp_2.contained.ENST00000572173	rs7189239	1711	0.00474019	0.00216542	0.209836	0.0951698	0.688088	4.22169e-06	2.669e-07	rs7189239	rs12598132	0.783258	0.878495	IBD	RMI2
txrevise_contained	IBD	IFNg_SL1344	ENSG00000175643.grp_2.contained.ENST00000572173	rs243314	1668	0.0167133	0.00321181	0.739772	0.142065	0.0982385	0.00066873	2.669e-07	rs4277361	rs12598132	0.240303	0.408811	IBD	RMI2
txrevise_contained	IBD	IFNg_SL1344	ENSG00000175643.grp_2.contained.ENST00000572173	rs7189239	1711	0.0166637	0.00326547	0.737659	0.144456	0.0979554	0.00066873	2.669e-07	rs4277361	rs12598132	0.242412	0.404087	IBD	RMI2
txrevise_contained	IBD	naive	ENSG00000187796.grp_2.contained.ENST00000485975	rs4073153	817	4.03917e-20	3.35338e-21	0.816384	0.0676615	0.115954	0.00382738	1.5e-25	rs10870201	rs4077515	0.183616	0.631505	IBD	CARD9
txrevise_contained	IBD	IFNg	ENSG00000187796.grp_2.contained.ENST00000485975	rs4073153	817	2.56683e-20	3.14699e-21	0.518799	0.0631879	0.418014	0.000869838	1.5e-25	rs3812565	rs4077515	0.481201	0.868687	IBD	CARD9
txrevise_contained	IBD	SL1344	ENSG00000187796.grp_2.contained.ENST00000485975	rs4073153	817	8.19912e-21	2.61913e-21	0.165718	0.0521547	0.782127	1.80137e-06	1.5e-25	rs4073153	rs4077515	0.834282	0.937485	IBD	CARD9
txrevise_contained	IBD	IFNg_SL1344	ENSG00000187796.grp_2.contained.ENST00000485975	rs4073153	817	2.92736e-20	3.39649e-21	0.591668	0.0683088	0.340023	0.000284677	1.5e-25	rs58783556	rs4077515	0.408332	0.832713	IBD	CARD9
txrevise_contained	IBD	naive	ENSG00000135926.grp_2.contained.ENST00000258412	rs2292550	555	2.64996e-05	7.93936e-05	0.0301057	0.0893172	0.880471	2.18966e-07	7.808e-09	rs60354137	rs4674277	0.969788	0.9079	IBD	TMBIM1
txrevise_contained	IBD	naive	ENSG00000135926.grp_2.contained.ENST00000258412	rs1877715	639	2.64654e-05	8.04239e-05	0.0300672	0.0904895	0.879336	2.18966e-07	7.808e-09	rs60354137	rs4674277	0.969826	0.906695	IBD	TMBIM1
txrevise_contained	IBD	IFNg	ENSG00000135926.grp_2.contained.ENST00000258412	rs2292550	555	5.31234e-05	0.000141369	0.0603525	0.159828	0.779625	1.70055e-07	7.808e-09	rs1877715	rs4674277	0.939453	0.829872	IBD	TMBIM1
txrevise_contained	IBD	IFNg	ENSG00000135926.grp_2.contained.ENST00000258412	rs1877715	639	5.2969e-05	0.000143513	0.0601776	0.162267	0.777359	1.70055e-07	7.808e-09	rs1877715	rs4674277	0.939626	0.827307	IBD	TMBIM1
txrevise_contained	IBD	SL1344	ENSG00000135926.grp_2.contained.ENST00000258412	rs2292550	555	0.000728016	5.11211e-05	0.827086	0.0579636	0.114171	0.0079057	7.808e-09	rs12468509	rs4674277	0.172134	0.663266	IBD	TMBIM1
txrevise_contained	IBD	SL1344	ENSG00000135926.grp_2.contained.ENST00000258412	rs1877715	639	0.000723857	5.58462e-05	0.822368	0.0633329	0.113519	0.0079057	7.808e-09	rs12468509	rs4674277	0.176852	0.641888	IBD	TMBIM1
txrevise_contained	IBD	IFNg_SL1344	ENSG00000135926.grp_2.contained.ENST00000258412	rs2292550	555	0.000777097	3.65256e-05	0.882846	0.0414211	0.0749193	0.06565	7.808e-09	rs6743642	rs4674277	0.11634	0.643966	IBD	TMBIM1
txrevise_contained	IBD	IFNg_SL1344	ENSG00000135926.grp_2.contained.ENST00000258412	rs1877715	639	0.000771705	4.23664e-05	0.876728	0.0480577	0.0744002	0.0434327	7.808e-09	rs7606069	rs4674277	0.122458	0.607557	IBD	TMBIM1
txrevise_contained	IBD	naive	ENSG00000105879.grp_1.contained.ENST00000487517	rs990107	781	2.58354e-09	6.01038e-10	0.119201	0.0268771	0.853922	2.40447e-06	4.502e-14	rs990107	rs4730272	0.880799	0.969486	IBD	CBLL1
txrevise_contained	IBD	IFNg	ENSG00000105879.grp_1.contained.ENST00000487517	rs990107	781	1.89151e-08	1.36561e-09	0.872714	0.0629428	0.0643431	0.00742144	4.502e-14	rs35868979	rs4730272	0.127286	0.505501	IBD	CBLL1
txrevise_contained	IBD	SL1344	ENSG00000105879.grp_1.contained.ENST00000487517	rs990107	781	1.89055e-08	1.3336e-09	0.872274	0.0614639	0.0662623	0.00223281	4.502e-14	rs3216280	rs4730272	0.127726	0.518784	IBD	CBLL1
txrevise_contained	IBD	IFNg_SL1344	ENSG00000105879.grp_1.contained.ENST00000487517	rs990107	781	1.87361e-08	1.37198e-09	0.864457	0.0632291	0.0723139	0.012804	4.502e-14	rs7785539	rs4730272	0.135543	0.533513	IBD	CBLL1
txrevise_contained	IBD	naive	ENSG00000258366.grp_1.contained.ENST00000425905	rs201926957	1320	1.44076e-15	7.81182e-15	0.0162679	0.0873085	0.896424	7.86842e-10	5.479e-20	rs201926957	rs6062496	0.983732	0.911248	IBD	RTEL1
txrevise_contained	IBD	naive	ENSG00000258366.grp_1.contained.ENST00000425905	rs4809342	1273	1.44181e-15	7.75309e-15	0.0162797	0.0866447	0.897076	7.86842e-10	5.479e-20	rs201926957	rs6062496	0.98372	0.911921	IBD	RTEL1
txrevise_contained	IBD	IFNg	ENSG00000258366.grp_1.contained.ENST00000425905	rs201926957	1320	1.79098e-14	1.86078e-14	0.202223	0.209516	0.588261	1.02876e-07	5.479e-20	rs4809342	rs6062496	0.797777	0.737375	IBD	RTEL1
txrevise_contained	IBD	IFNg	ENSG00000258366.grp_1.contained.ENST00000425905	rs4809342	1273	1.80879e-14	1.7912e-14	0.204234	0.201654	0.594112	1.02876e-07	5.479e-20	rs4809342	rs6062496	0.795766	0.746591	IBD	RTEL1
txrevise_contained	IBD	SL1344	ENSG00000258366.grp_1.contained.ENST00000425905	rs201926957	1320	4.35448e-14	2.29979e-14	0.491673	0.259425	0.248902	8.03354e-06	5.479e-20	rs6010992	rs6062496	0.508327	0.489649	IBD	RTEL1
txrevise_contained	IBD	SL1344	ENSG00000258366.grp_1.contained.ENST00000425905	rs4809342	1273	4.4075e-14	2.21996e-14	0.497659	0.250408	0.251932	8.03354e-06	5.479e-20	rs6010992	rs6062496	0.502341	0.501517	IBD	RTEL1
txrevise_contained	IBD	IFNg_SL1344	ENSG00000258366.grp_1.contained.ENST00000425905	rs201926957	1320	7.22938e-14	8.9096e-15	0.816284	0.100517	0.0831991	0.00731438	5.479e-20	rs34980032	rs6062496	0.183716	0.452868	IBD	RTEL1
txrevise_contained	IBD	IFNg_SL1344	ENSG00000258366.grp_1.contained.ENST00000425905	rs4809342	1273	7.26066e-14	8.56495e-15	0.819816	0.0966251	0.0835591	0.007566	5.479e-20	rs3827026	rs6062496	0.180184	0.463743	IBD	RTEL1
txrevise_contained	IBD	naive	ENSG00000185499.grp_1.contained.ENST00000611571	rs12743084	460	0.00352356	0.00527306	0.177465	0.265031	0.548707	2.01185e-07	6.915e-07	rs12743084	rs734073	0.813738	0.674304	IBD	MUC1
txrevise_contained	IBD	naive	ENSG00000185499.grp_1.contained.ENST00000620770	rs4072037	463	0.00821455	0.00205278	0.414408	0.103086	0.472239	8.18001e-06	6.915e-07	rs4072037	rs734073	0.575325	0.820821	IBD	MUC1
txrevise_contained	IBD	naive	ENSG00000116521.grp_2.contained.ENST00000302631	rs2242577	421	0.00148618	0.00213306	0.0754467	0.107472	0.813462	2.76083e-09	6.915e-07	rs11389873;rs143421472	rs734073	0.920934	0.883301	IBD	SCAMP3
txrevise_contained	IBD	naive	ENSG00000116521.grp_2.contained.ENST00000355379	rs28373017	432	0.000924482	0.00208903	0.0468777	0.105083	0.845025	2.78294e-10	6.915e-07	rs11389873;rs143421472	rs734073	0.950109	0.889399	IBD	SCAMP3
txrevise_contained	IBD	naive	ENSG00000185499.grp_1.contained.ENST00000611571	rs4072037	463	0.00352067	0.00527003	0.177611	0.265314	0.548284	2.01185e-07	6.915e-07	rs12743084	rs734073	0.813598	0.6739	IBD	MUC1
txrevise_contained	IBD	naive	ENSG00000116521.grp_2.contained.ENST00000302631	rs112270735	437	0.00149065	0.00209557	0.0755313	0.105367	0.815515	2.76083e-09	6.915e-07	rs11389873;rs143421472	rs734073	0.920882	0.88558	IBD	SCAMP3
txrevise_contained	IBD	IFNg	ENSG00000185499.grp_1.contained.ENST00000611571	rs12743084	460	1.00809e-13	0.00109236	5.07727e-12	0.0540721	0.944836	1.20342e-30	6.915e-07	rs4072037	rs734073	0.998908	0.945869	IBD	MUC1
txrevise_contained	IBD	IFNg	ENSG00000185499.grp_1.contained.ENST00000620770	rs4072037	463	7.68774e-14	0.00106441	3.87831e-12	0.052751	0.946185	5.93426e-31	6.915e-07	rs4072037	rs734073	0.998936	0.947193	IBD	MUC1
txrevise_contained	IBD	IFNg	ENSG00000116521.grp_2.contained.ENST00000302631	rs2242577	421	0.000225298	0.00158376	0.0114374	0.0794931	0.90726	2.06541e-10	6.915e-07	rs2072647	rs734073	0.986754	0.91944	IBD	SCAMP3
txrevise_contained	IBD	IFNg	ENSG00000116521.grp_2.contained.ENST00000355379	rs28373017	432	0.000993607	0.00182511	0.0503828	0.0916906	0.855108	1.35371e-08	6.915e-07	rs2072647	rs734073	0.946798	0.903157	IBD	SCAMP3
txrevise_contained	IBD	IFNg	ENSG00000185499.grp_1.contained.ENST00000611571	rs4072037	463	1.008e-13	0.00109226	5.08515e-12	0.0541575	0.94475	1.20342e-30	6.915e-07	rs4072037	rs734073	0.998908	0.945783	IBD	MUC1
txrevise_contained	IBD	IFNg	ENSG00000116521.grp_2.contained.ENST00000302631	rs112270735	437	0.000226717	0.00149861	0.0114878	0.075023	0.911764	2.06541e-10	6.915e-07	rs2072647	rs734073	0.986787	0.923972	IBD	SCAMP3
txrevise_contained	IBD	SL1344	ENSG00000185499.grp_1.contained.ENST00000611571	rs12743084	460	6.46961e-08	0.00115693	3.25844e-06	0.0573279	0.941512	2.4787e-18	6.915e-07	rs4072037	rs734073	0.99884	0.942606	IBD	MUC1
txrevise_contained	IBD	SL1344	ENSG00000185499.grp_1.contained.ENST00000620770	rs4072037	463	1.81864e-09	0.00106424	9.1747e-08	0.0527424	0.946193	8.81995e-22	6.915e-07	rs4072037	rs734073	0.998936	0.947201	IBD	MUC1
txrevise_contained	IBD	SL1344	ENSG00000116521.grp_2.contained.ENST00000302631	rs2242577	421	0.00258817	0.00209752	0.131389	0.105723	0.758202	3.72546e-07	6.915e-07	rs116352080	rs734073	0.863925	0.877625	IBD	SCAMP3
txrevise_contained	IBD	SL1344	ENSG00000116521.grp_2.contained.ENST00000355379	rs28373017	432	0.00300993	0.00238496	0.152625	0.120212	0.721768	1.05884e-07	6.915e-07	rs28373017	rs734073	0.841981	0.857227	IBD	SCAMP3
txrevise_contained	IBD	SL1344	ENSG00000185499.grp_1.contained.ENST00000611571	rs4072037	463	6.46899e-08	0.00115682	3.26348e-06	0.057418	0.941422	2.4787e-18	6.915e-07	rs4072037	rs734073	0.99884	0.942515	IBD	MUC1
txrevise_contained	IBD	SL1344	ENSG00000116521.grp_2.contained.ENST00000302631	rs112270735	437	0.00259577	0.00206346	0.131528	0.103796	0.760017	3.72546e-07	6.915e-07	rs116352080	rs734073	0.863813	0.87984	IBD	SCAMP3
txrevise_contained	IBD	IFNg_SL1344	ENSG00000185499.grp_1.contained.ENST00000611571	rs12743084	460	1.37568e-14	0.00106379	6.92865e-13	0.0526321	0.946304	1.6096e-32	6.915e-07	rs4072037	rs734073	0.998936	0.947312	IBD	MUC1
txrevise_contained	IBD	IFNg_SL1344	ENSG00000185499.grp_1.contained.ENST00000620770	rs4072037	463	6.98237e-14	0.00106979	3.52247e-12	0.0530228	0.945907	4.96828e-31	6.915e-07	rs4072037	rs734073	0.99893	0.94692	IBD	MUC1
txrevise_contained	IBD	IFNg_SL1344	ENSG00000116521.grp_2.contained.ENST00000302631	rs2242577	421	0.00646128	0.00128088	0.32801	0.0644247	0.599823	3.66149e-06	6.915e-07	rs112270735	rs734073	0.664248	0.903011	IBD	SCAMP3
txrevise_contained	IBD	IFNg_SL1344	ENSG00000116521.grp_2.contained.ENST00000355379	rs28373017	432	0.00727827	0.00133209	0.36906	0.0669912	0.555339	7.74901e-06	6.915e-07	rs201515571	rs734073	0.62233	0.892354	IBD	SCAMP3
txrevise_contained	IBD	IFNg_SL1344	ENSG00000185499.grp_1.contained.ENST00000611571	rs4072037	463	1.37556e-14	0.0010637	6.93941e-13	0.0527153	0.946221	1.6096e-32	6.915e-07	rs4072037	rs734073	0.998936	0.947229	IBD	MUC1
txrevise_contained	IBD	IFNg_SL1344	ENSG00000116521.grp_2.contained.ENST00000302631	rs112270735	437	0.00647631	0.00125891	0.328155	0.063188	0.600922	3.66149e-06	6.915e-07	rs112270735	rs734073	0.664109	0.904853	IBD	SCAMP3
txrevise_contained	IBD	naive	ENSG00000283189.grp_1.contained.ENST00000638115	rs11711536	493	1.10605e-15	1.92113e-16	0.739555	0.128324	0.132121	0.000224715	1.224e-20	rs4536858	rs7633271	0.260445	0.507291	IBD	RP11-949J7.8
txrevise_contained	IBD	IFNg	ENSG00000283189.grp_1.contained.ENST00000638115	rs11711536	493	1.11702e-15	1.0069e-16	0.746891	0.0671402	0.185969	0.00501635	1.224e-20	rs13088309	rs7633271	0.253109	0.734738	IBD	RP11-949J7.8
txrevise_contained	IBD	SL1344	ENSG00000283189.grp_1.contained.ENST00000638115	rs11711536	493	1.70169e-16	1.09508e-16	0.113783	0.0724084	0.813809	1.15081e-06	1.224e-20	rs11711536	rs7633271	0.886217	0.918295	IBD	RP11-949J7.8
txrevise_contained	IBD	IFNg_SL1344	ENSG00000283189.grp_1.contained.ENST00000638115	rs11711536	493	1.09438e-15	1.07374e-16	0.731754	0.0715983	0.196648	0.000542058	1.224e-20	rs13075426	rs7633271	0.268246	0.733088	IBD	RP11-949J7.8
txrevise_contained	IBD	naive	ENSG00000121281.grp_2.contained.ENST00000568930	rs9924714	691	1.37121e-05	5.83846e-06	0.167373	0.0705033	0.762104	8.89987e-07	1.715e-09	rs9924714	rs9934775	0.832607	0.915322	IBD	ADCY7
txrevise_contained	IBD	IFNg	ENSG00000121281.grp_2.contained.ENST00000568930	rs9924714	691	2.43495e-05	1.18415e-05	0.297215	0.143981	0.558767	1.0396e-07	1.715e-09	rs9924714	rs9934775	0.702749	0.795117	IBD	ADCY7
txrevise_contained	IBD	SL1344	ENSG00000121281.grp_2.contained.ENST00000568930	rs9924714	691	6.86908e-05	5.6581e-06	0.838454	0.0689714	0.0925001	0.000296276	1.715e-09	rs11644926	rs9934775	0.161471	0.572857	IBD	ADCY7
txrevise_contained	IBD	IFNg_SL1344	ENSG00000121281.grp_2.contained.ENST00000568930	rs9924714	691	6.38732e-05	5.06572e-06	0.77965	0.0616746	0.158607	0.000984066	1.715e-09	rs56070459	rs9934775	0.220281	0.720019	IBD	ADCY7
txrevise_contained	UC	naive	ENSG00000283189.grp_1.contained.ENST00000638115	rs11711536	493	2.37879e-08	4.1318e-09	0.739305	0.12828	0.132415	0.000224715	5.377e-13	rs4536858	rs111903592	0.260695	0.507931	IBD	RP11-949J7.8
txrevise_contained	UC	IFNg	ENSG00000283189.grp_1.contained.ENST00000638115	rs11711536	493	2.40162e-08	2.16487e-09	0.7464	0.0670955	0.186504	0.00501635	5.377e-13	rs13088309	rs111903592	0.2536	0.735428	IBD	RP11-949J7.8
txrevise_contained	UC	SL1344	ENSG00000283189.grp_1.contained.ENST00000638115	rs11711536	493	3.61112e-09	2.32385e-09	0.11223	0.0714064	0.816364	1.15081e-06	5.377e-13	rs11711536	rs111903592	0.88777	0.919567	IBD	RP11-949J7.8
txrevise_contained	UC	IFNg_SL1344	ENSG00000283189.grp_1.contained.ENST00000638115	rs11711536	493	2.35167e-08	2.30731e-09	0.730877	0.0715113	0.197612	0.000542058	5.377e-13	rs13075426	rs111903592	0.269123	0.73428	IBD	RP11-949J7.8
txrevise_contained	UC	naive	ENSG00000138107.grp_2.contained.ENST00000636707	rs139901931	694	0.00272805	0.013328	0.0495504	0.241388	0.693006	2.38437e-11	9.996e-07	rs139901931	rs11591780	0.934394	0.741664	IBD	ACTR1A
txrevise_contained	UC	naive	ENSG00000138111.grp_1.contained.ENST00000450947	rs715440	686	1.74092e-05	0.0165663	0.000316167	0.300175	0.682925	2.14439e-14	9.996e-07	rs11191300	rs11591780	0.9831	0.694665	IBD	MFSD13A
txrevise_contained	UC	naive	ENSG00000138107.grp_2.contained.ENST00000636707	rs11598884	688	0.00272827	0.0133158	0.0495834	0.241307	0.693065	2.38437e-11	9.996e-07	rs139901931	rs11591780	0.934372	0.741744	IBD	ACTR1A
txrevise_contained	UC	IFNg	ENSG00000138107.grp_2.contained.ENST00000636707	rs139901931	694	0.00726584	0.0227356	0.131972	0.412529	0.425497	1.04156e-10	9.996e-07	rs11598884	rs11591780	0.838027	0.507737	IBD	ACTR1A
txrevise_contained	UC	IFNg	ENSG00000138111.grp_1.contained.ENST00000450947	rs715440	686	1.16757e-05	0.00400783	0.00021204	0.0718617	0.923907	3.24224e-12	9.996e-07	rs715440	rs11591780	0.995768	0.927833	IBD	MFSD13A
txrevise_contained	UC	IFNg	ENSG00000138107.grp_2.contained.ENST00000636707	rs11598884	688	0.00726511	0.0227216	0.132036	0.412515	0.425462	1.04156e-10	9.996e-07	rs11598884	rs11591780	0.837978	0.507725	IBD	ACTR1A
txrevise_contained	UC	SL1344	ENSG00000138107.grp_2.contained.ENST00000636707	rs139901931	694	0.0022253	0.00463879	0.0404188	0.0833867	0.86933	5.34831e-08	9.996e-07	rs139901931	rs11591780	0.952717	0.912475	IBD	ACTR1A
txrevise_contained	UC	SL1344	ENSG00000138111.grp_1.contained.ENST00000450947	rs715440	686	0.014926	0.00629503	0.27107	0.113729	0.59398	3.53137e-05	9.996e-07	rs11191299	rs11591780	0.707709	0.8393	IBD	MFSD13A
txrevise_contained	UC	SL1344	ENSG00000138107.grp_2.contained.ENST00000636707	rs11598884	688	0.00222558	0.00462887	0.0404475	0.0832554	0.869443	5.34831e-08	9.996e-07	rs139901931	rs11591780	0.952698	0.912611	IBD	ACTR1A
txrevise_contained	UC	IFNg_SL1344	ENSG00000138107.grp_2.contained.ENST00000636707	rs139901931	694	0.0329494	0.00575462	0.598472	0.104265	0.25856	0.000126532	9.996e-07	rs72845807	rs11591780	0.362824	0.712631	IBD	ACTR1A
txrevise_contained	UC	IFNg_SL1344	ENSG00000138111.grp_1.contained.ENST00000450947	rs715440	686	0.043038	0.00395478	0.781607	0.0717225	0.0996775	0.00204022	9.996e-07	rs11191293	rs11591780	0.1714	0.581549	IBD	MFSD13A
txrevise_contained	UC	IFNg_SL1344	ENSG00000138107.grp_2.contained.ENST00000636707	rs11598884	688	0.0329354	0.0057515	0.598565	0.104269	0.258479	0.000126532	9.996e-07	rs72845807	rs11591780	0.362748	0.712559	IBD	ACTR1A
txrevise_contained	UC	naive	ENSG00000187796.grp_2.contained.ENST00000485975	rs4073153	817	3.3527e-08	2.78346e-09	0.815519	0.0675887	0.116892	0.00382738	2.894e-13	rs10870201	rs3829111	0.184481	0.633627	IBD	CARD9
txrevise_contained	UC	IFNg	ENSG00000187796.grp_2.contained.ENST00000485975	rs4073153	817	2.10184e-08	2.57691e-09	0.511257	0.0622548	0.426488	0.000869838	2.894e-13	rs3812565	rs3829111	0.488743	0.872622	IBD	CARD9
txrevise_contained	UC	SL1344	ENSG00000187796.grp_2.contained.ENST00000485975	rs4073153	817	6.79477e-09	2.17052e-09	0.165278	0.0520136	0.782709	1.80137e-06	2.894e-13	rs4073153	rs3829111	0.834722	0.937688	IBD	CARD9
txrevise_contained	UC	IFNg_SL1344	ENSG00000187796.grp_2.contained.ENST00000485975	rs4073153	817	2.45472e-08	2.84811e-09	0.597092	0.0689441	0.333964	0.000284677	2.894e-13	rs58783556	rs3829111	0.402908	0.828884	IBD	CARD9
txrevise_contained	UC	naive	ENSG00000135926.grp_2.contained.ENST00000258412	rs2292550	555	2.68291e-05	8.03808e-05	0.0244274	0.072282	0.903183	2.18966e-07	5.284e-09	rs60354137	rs4674277	0.975465	0.9259	IBD	TMBIM1
txrevise_contained	UC	naive	ENSG00000135926.grp_2.contained.ENST00000258412	rs1877715	639	2.68009e-05	8.14434e-05	0.0244025	0.0732528	0.902236	2.18966e-07	5.284e-09	rs60354137	rs4674277	0.975489	0.924907	IBD	TMBIM1
txrevise_contained	UC	IFNg	ENSG00000135926.grp_2.contained.ENST00000258412	rs2292550	555	6.22576e-05	0.000165677	0.0566844	0.150053	0.793035	1.70055e-07	5.284e-09	rs1877715	rs4674277	0.943088	0.840892	IBD	TMBIM1
txrevise_contained	UC	IFNg	ENSG00000135926.grp_2.contained.ENST00000258412	rs1877715	639	6.20873e-05	0.000168218	0.056531	0.152373	0.790865	1.70055e-07	5.284e-09	rs1877715	rs4674277	0.943239	0.838457	IBD	TMBIM1
txrevise_contained	UC	SL1344	ENSG00000135926.grp_2.contained.ENST00000258412	rs2292550	555	0.000908279	6.37791e-05	0.826971	0.0579556	0.114101	0.0079057	5.284e-09	rs12468509	rs4674277	0.172057	0.663161	IBD	TMBIM1
txrevise_contained	UC	SL1344	ENSG00000135926.grp_2.contained.ENST00000258412	rs1877715	639	0.00090307	6.96727e-05	0.822254	0.0633242	0.113449	0.0079057	5.284e-09	rs12468509	rs4674277	0.176773	0.641777	IBD	TMBIM1
txrevise_contained	UC	IFNg_SL1344	ENSG00000135926.grp_2.contained.ENST00000258412	rs2292550	555	0.000968807	4.55365e-05	0.882081	0.0413846	0.0755205	0.06565	5.284e-09	rs6743642	rs4674277	0.116905	0.645998	IBD	TMBIM1
txrevise_contained	UC	IFNg_SL1344	ENSG00000135926.grp_2.contained.ENST00000258412	rs1877715	639	0.000962068	5.28173e-05	0.875972	0.0480156	0.0749976	0.0434327	5.284e-09	rs7606069	rs4674277	0.123013	0.609671	IBD	TMBIM1
txrevise_contained	UC	naive	ENSG00000258366.grp_1.contained.ENST00000425905	rs201926957	1320	2.66055e-08	1.44256e-07	0.0166205	0.0892227	0.894157	7.86842e-10	1.468e-12	rs201926957	rs6062496	0.983379	0.909269	IBD	RTEL1
txrevise_contained	UC	naive	ENSG00000258366.grp_1.contained.ENST00000425905	rs4809342	1273	2.66253e-08	1.43173e-07	0.0166329	0.0885459	0.894821	7.86842e-10	1.468e-12	rs201926957	rs6062496	0.983367	0.909956	IBD	RTEL1
txrevise_contained	UC	IFNg	ENSG00000258366.grp_1.contained.ENST00000425905	rs201926957	1320	3.27282e-07	3.40038e-07	0.204454	0.211839	0.583707	1.02876e-07	1.468e-12	rs4809342	rs6062496	0.795545	0.733719	IBD	RTEL1
txrevise_contained	UC	IFNg	ENSG00000258366.grp_1.contained.ENST00000425905	rs4809342	1273	3.30573e-07	3.27358e-07	0.20651	0.203912	0.589577	1.02876e-07	1.468e-12	rs4809342	rs6062496	0.793489	0.743018	IBD	RTEL1
txrevise_contained	UC	SL1344	ENSG00000258366.grp_1.contained.ENST00000425905	rs201926957	1320	7.88752e-07	4.16575e-07	0.492736	0.259988	0.247275	8.03354e-06	1.468e-12	rs6010992	rs6062496	0.507263	0.487469	IBD	RTEL1
txrevise_contained	UC	SL1344	ENSG00000258366.grp_1.contained.ENST00000425905	rs4809342	1273	7.98377e-07	4.02125e-07	0.498748	0.250959	0.250292	8.03354e-06	1.468e-12	rs6010992	rs6062496	0.501251	0.499335	IBD	RTEL1
txrevise_contained	UC	IFNg_SL1344	ENSG00000258366.grp_1.contained.ENST00000425905	rs201926957	1320	1.30721e-06	1.61102e-07	0.816617	0.100558	0.0828235	0.00731438	1.468e-12	rs34980032	rs6062496	0.183382	0.451645	IBD	RTEL1
txrevise_contained	UC	IFNg_SL1344	ENSG00000258366.grp_1.contained.ENST00000425905	rs4809342	1273	1.31287e-06	1.54871e-07	0.820151	0.096665	0.083182	0.007566	1.468e-12	rs3827026	rs6062496	0.179847	0.462515	IBD	RTEL1
txrevise_contained	RA	naive	ENSG00000123297.grp_1.contained.ENST00000497617	rs701008	473	0.0103076	0.0010194	0.766126	0.0756212	0.146926	0.000275761	9.1e-08	rs67840872	rs1633360	0.222547	0.660201	RA	TSFM
txrevise_contained	RA	IFNg	ENSG00000123297.grp_1.contained.ENST00000497617	rs701008	473	0.00388947	0.00350348	0.28909	0.259957	0.44356	2.72312e-07	9.1e-08	rs701008	rs1633360	0.703517	0.630489	RA	TSFM
txrevise_contained	RA	SL1344	ENSG00000123297.grp_1.contained.ENST00000497617	rs701008	473	0.000973883	0.000656782	0.0723851	0.0479381	0.878046	4.00627e-07	9.1e-08	rs701006	rs1633360	0.925984	0.94823	RA	TSFM
txrevise_contained	RA	IFNg_SL1344	ENSG00000123297.grp_1.contained.ENST00000497617	rs701008	473	0.0100846	0.000890891	0.749551	0.0660432	0.17343	0.000732263	9.1e-08	rs67840872	rs1633360	0.239474	0.724215	RA	TSFM
txrevise_contained	RA	naive	ENSG00000112977.grp_1.contained.ENST00000510546	rs267962	988	7.27124e-05	0.00567978	0.00153704	0.119189	0.873521	2.70577e-13	9.3e-07	rs267962	rs267949	0.99271	0.879935	RA	DAP
txrevise_contained	RA	naive	ENSG00000112977.grp_2.contained.ENST00000510546	5_10756068	1043	0.000111299	0.00569382	0.00235283	0.119494	0.872348	8.66035e-13	9.3e-07	rs267962	rs267949	0.991842	0.879523	RA	DAP
txrevise_contained	RA	naive	ENSG00000112977.grp_2.contained.ENST00000510546	rs2930055	983	0.000111301	0.00569332	0.00235275	0.119477	0.872366	8.66035e-13	9.3e-07	rs267962	rs267949	0.991843	0.879541	RA	DAP
txrevise_contained	RA	IFNg	ENSG00000112977.grp_1.contained.ENST00000510546	rs267962	988	0.00723307	0.00394175	0.152898	0.08257	0.753358	5.4749e-07	9.3e-07	5_10756068	rs267949	0.835928	0.901224	RA	DAP
txrevise_contained	RA	IFNg	ENSG00000112977.grp_2.contained.ENST00000510546	5_10756068	1043	0.00665643	0.00414074	0.140715	0.0867725	0.761715	2.69699e-07	9.3e-07	5_10756068	rs267949	0.848487	0.897733	RA	DAP
txrevise_contained	RA	IFNg	ENSG00000112977.grp_2.contained.ENST00000510546	rs2930055	983	0.00666092	0.00411363	0.140803	0.0861943	0.762228	2.69699e-07	9.3e-07	5_10756068	rs267949	0.848423	0.898406	RA	DAP
txrevise_contained	RA	SL1344	ENSG00000112977.grp_1.contained.ENST00000510546	rs267962	988	0.00109985	0.00551781	0.0232493	0.115785	0.854348	1.6735e-09	9.3e-07	rs267962	rs267949	0.970133	0.88065	RA	DAP
txrevise_contained	RA	SL1344	ENSG00000112977.grp_2.contained.ENST00000510546	5_10756068	1043	0.00129133	0.00592955	0.0272984	0.124508	0.840972	3.19701e-09	9.3e-07	rs267962	rs267949	0.965481	0.87104	RA	DAP
txrevise_contained	RA	SL1344	ENSG00000112977.grp_2.contained.ENST00000510546	rs2930055	983	0.00129157	0.00592264	0.027302	0.124356	0.841128	3.19701e-09	9.3e-07	rs267962	rs267949	0.965484	0.871199	RA	DAP
txrevise_contained	RA	IFNg_SL1344	ENSG00000112977.grp_1.contained.ENST00000510546	rs267962	988	0.000572659	0.00276101	0.0121053	0.057437	0.927124	4.43226e-10	9.3e-07	rs2930055	rs267949	0.984561	0.941662	RA	DAP
txrevise_contained	RA	IFNg_SL1344	ENSG00000112977.grp_2.contained.ENST00000510546	5_10756068	1043	0.000529005	0.00275922	0.0111831	0.0574012	0.928128	2.34814e-10	9.3e-07	rs2930055	rs267949	0.985529	0.941756	RA	DAP
txrevise_contained	RA	IFNg_SL1344	ENSG00000112977.grp_2.contained.ENST00000510546	rs2930055	983	0.000529056	0.00275532	0.0111835	0.0573154	0.928217	2.34814e-10	9.3e-07	rs2930055	rs267949	0.985532	0.941843	RA	DAP
txrevise_contained	RA	naive	ENSG00000204084.grp_1.contained.ENST00000470364	rs11264103	715	3.88031e-08	0.000111625	1.69005e-05	0.0476652	0.952206	9.99602e-16	5.2e-09	rs12116786	rs28411352	0.999871	0.952329	RA	INPP5B
txrevise_contained	RA	naive	ENSG00000204084.grp_1.contained.ENST00000373027	rs11264103	715	8.41293e-08	0.000104254	3.6642e-05	0.0444519	0.955407	1.3e-14	5.2e-09	rs2306627	rs28411352	0.999859	0.955542	RA	INPP5B
txrevise_contained	RA	IFNg	ENSG00000204084.grp_1.contained.ENST00000470364	rs11264103	715	4.38457e-08	0.000112059	1.90967e-05	0.0478547	0.952014	1.35174e-15	5.2e-09	rs12116786	rs28411352	0.999869	0.952139	RA	INPP5B
txrevise_contained	RA	IFNg	ENSG00000204084.grp_1.contained.ENST00000373027	rs11264103	715	7.09103e-08	0.000114573	3.08846e-05	0.0489508	0.950904	2.99769e-15	5.2e-09	rs12116786	rs28411352	0.999854	0.951042	RA	INPP5B
txrevise_contained	RA	SL1344	ENSG00000204084.grp_1.contained.ENST00000470364	rs11264103	715	2.18171e-05	7.81542e-05	0.00950232	0.0330823	0.957315	6.00262e-09	5.2e-09	rs12116786	rs28411352	0.990398	0.966597	RA	INPP5B
txrevise_contained	RA	SL1344	ENSG00000204084.grp_1.contained.ENST00000373027	rs11264103	715	2.1967e-05	9.08053e-05	0.0095676	0.038598	0.951722	2.17647e-09	5.2e-09	rs12116786	rs28411352	0.99032	0.961025	RA	INPP5B
txrevise_contained	RA	IFNg_SL1344	ENSG00000204084.grp_1.contained.ENST00000470364	rs11264103	715	0.000581058	0.000175048	0.253076	0.0755706	0.670597	1.13358e-05	5.2e-09	rs28593140	rs28411352	0.746168	0.898722	RA	INPP5B
txrevise_contained	RA	IFNg_SL1344	ENSG00000204084.grp_1.contained.ENST00000373027	rs11264103	715	0.000532129	0.000174012	0.231765	0.0750974	0.692431	1.50061e-05	5.2e-09	rs557538	rs28411352	0.767528	0.902157	RA	INPP5B
txrevise_contained	RA	naive	ENSG00000101017.grp_2.contained.ENST00000466205	rs72534930	546	1.49011e-08	8.78113e-10	0.805985	0.0473495	0.146666	0.00128029	4.2e-14	rs2297197	rs4239702	0.194015	0.75595	RA	CD40
txrevise_contained	RA	IFNg	ENSG00000101017.grp_2.contained.ENST00000466205	rs72534930	546	2.04245e-09	8.50526e-10	0.110474	0.0451597	0.844367	7.66784e-07	4.2e-14	rs72534930	rs4239702	0.889526	0.949232	RA	CD40
txrevise_contained	RA	SL1344	ENSG00000101017.grp_2.contained.ENST00000466205	rs72534930	546	1.52136e-08	8.7739e-10	0.822887	0.0473273	0.129786	0.00304793	4.2e-14	rs17381472	rs4239702	0.177113	0.732785	RA	CD40
txrevise_contained	RA	IFNg_SL1344	ENSG00000101017.grp_2.contained.ENST00000466205	rs72534930	546	1.63848e-08	8.03949e-10	0.886236	0.0434144	0.0703492	0.012079	4.2e-14	rs117708696	rs4239702	0.113764	0.618381	RA	CD40
txrevise_contained	RA	naive	ENSG00000143226.grp_2.contained.ENST00000459885	rs10494360	670	1.47334e-06	0.000348161	0.000230551	0.0535348	0.945885	4.2131e-17	9.8e-08	rs12722986	rs4657041	0.99942	0.946434	RA	FCGR2A
txrevise_contained	RA	naive	ENSG00000143226.grp_2.contained.ENST00000471026	rs10494360	670	5.93263e-06	0.000369808	0.000928346	0.0569264	0.94177	3.01674e-15	9.8e-08	rs12722986	rs4657041	0.998696	0.942999	RA	FCGR2A
txrevise_contained	RA	naive	ENSG00000143226.grp_2.contained.ENST00000471026	rs10494359	663	5.93264e-06	0.000369802	0.000928337	0.0569246	0.941771	3.01674e-15	9.8e-08	rs12722986	rs4657041	0.998696	0.943001	RA	FCGR2A
txrevise_contained	RA	IFNg	ENSG00000143226.grp_2.contained.ENST00000459885	rs10494360	670	6.04104e-07	0.000347853	9.45311e-05	0.0534865	0.946071	2.67611e-18	9.8e-08	rs12722986	rs4657041	0.999557	0.94649	RA	FCGR2A
txrevise_contained	RA	IFNg	ENSG00000143226.grp_2.contained.ENST00000471026	rs10494360	670	1.03131e-06	0.000345045	0.000161382	0.0530468	0.946446	1.38707e-17	9.8e-08	rs12722986	rs4657041	0.999493	0.946926	RA	FCGR2A
txrevise_contained	RA	IFNg	ENSG00000143226.grp_2.contained.ENST00000471026	rs10494359	663	1.03132e-06	0.000345044	0.00016138	0.0530458	0.946447	1.38707e-17	9.8e-08	rs12722986	rs4657041	0.999493	0.946927	RA	FCGR2A
txrevise_contained	RA	SL1344	ENSG00000143226.grp_2.contained.ENST00000459885	rs10494360	670	2.04753e-06	0.000346261	0.0003204	0.0532373	0.946094	1.13459e-16	9.8e-08	rs12722986	rs4657041	0.999331	0.946727	RA	FCGR2A
txrevise_contained	RA	SL1344	ENSG00000143226.grp_2.contained.ENST00000471026	rs10494360	670	1.04492e-06	0.000344517	0.00016351	0.052964	0.946527	1.48032e-17	9.8e-08	rs12722986	rs4657041	0.999491	0.947009	RA	FCGR2A
txrevise_contained	RA	SL1344	ENSG00000143226.grp_2.contained.ENST00000471026	rs10494359	663	1.04492e-06	0.000344514	0.000163508	0.0529629	0.946528	1.48032e-17	9.8e-08	rs12722986	rs4657041	0.999491	0.94701	RA	FCGR2A
txrevise_contained	RA	IFNg_SL1344	ENSG00000143226.grp_2.contained.ENST00000459885	rs10494360	670	9.35217e-05	0.00036366	0.0146344	0.0559771	0.928931	1.52164e-11	9.8e-08	rs12722986	rs4657041	0.984908	0.943165	RA	FCGR2A
txrevise_contained	RA	IFNg_SL1344	ENSG00000143226.grp_2.contained.ENST00000471026	rs10494360	670	4.29836e-07	0.000337988	6.72613e-05	0.0519411	0.947653	6.59697e-19	9.8e-08	rs10494359	rs4657041	0.999594	0.948038	RA	FCGR2A
txrevise_contained	RA	IFNg_SL1344	ENSG00000143226.grp_2.contained.ENST00000471026	rs10494359	663	4.29836e-07	0.000337987	6.72605e-05	0.0519404	0.947654	6.59697e-19	9.8e-08	rs10494359	rs4657041	0.999594	0.948038	RA	FCGR2A
txrevise_contained	RA	naive	ENSG00000197728.grp_1.contained.ENST00000552361	rs7312770	264	1.43012e-06	0.000582627	9.76669e-05	0.0388286	0.96049	2.54882e-14	8.5e-08	rs7312770	rs773125	0.999318	0.961145	RA	RPS26
txrevise_contained	RA	naive	ENSG00000197728.grp_1.contained.ENST00000548590	rs705700	255	0.00252925	0.000352797	0.1725	0.0232602	0.801358	4.46532e-06	8.5e-08	rs11171739	rs773125	0.824618	0.971793	RA	RPS26
txrevise_contained	RA	naive	ENSG00000197728.grp_2.contained.ENST00000356464	rs773125	256	0.00282629	0.000371439	0.192766	0.0245544	0.779481	5.32534e-06	8.5e-08	rs11171739	rs773125	0.804036	0.969461	RA	RPS26
txrevise_contained	RA	IFNg	ENSG00000197728.grp_1.contained.ENST00000552361	rs7312770	264	0.00197815	0.000380306	0.135093	0.0251346	0.837414	4.38975e-07	8.5e-08	rs7312770	rs773125	0.862549	0.97086	RA	RPS26
txrevise_contained	RA	IFNg	ENSG00000197728.grp_1.contained.ENST00000548590	rs705700	255	0.00524748	0.000368027	0.35789	0.0244882	0.612006	5.84184e-05	8.5e-08	rs1081975	rs773125	0.636495	0.961526	RA	RPS26
txrevise_contained	RA	IFNg	ENSG00000197728.grp_2.contained.ENST00000356464	rs773125	256	0.0057799	0.000375019	0.394216	0.0250034	0.574626	7.27879e-05	8.5e-08	rs1081975	rs773125	0.599629	0.958302	RA	RPS26
txrevise_contained	RA	SL1344	ENSG00000197728.grp_1.contained.ENST00000552361	rs7312770	264	1.3975e-07	0.000349302	9.54391e-06	0.022878	0.976763	3.51491e-16	8.5e-08	rs10876864	rs773125	0.999641	0.977114	RA	RPS26
txrevise_contained	RA	SL1344	ENSG00000197728.grp_1.contained.ENST00000548590	rs705700	255	2.52475e-08	0.000132679	1.72193e-06	0.00805721	0.991808	1.8701e-17	8.5e-08	rs705700	rs773125	0.999866	0.991942	RA	RPS26
txrevise_contained	RA	SL1344	ENSG00000197728.grp_2.contained.ENST00000356464	rs773125	256	4.45805e-08	0.00013581	3.0406e-06	0.00827131	0.99159	6.24021e-17	8.5e-08	rs705700	rs773125	0.999861	0.991728	RA	RPS26
txrevise_contained	RA	IFNg_SL1344	ENSG00000197728.grp_1.contained.ENST00000552361	rs7312770	264	0.00356634	0.000432266	0.243554	0.0287969	0.72365	1.00046e-05	8.5e-08	rs2271194	rs773125	0.752447	0.961729	RA	RPS26
txrevise_contained	RA	IFNg_SL1344	ENSG00000197728.grp_1.contained.ENST00000548590	rs705700	255	0.000160783	0.00022743	0.0109657	0.0145371	0.974109	9.20098e-09	8.5e-08	rs773125	rs773125	0.988646	0.985296	RA	RPS26
txrevise_contained	RA	IFNg_SL1344	ENSG00000197728.grp_2.contained.ENST00000356464	rs773125	256	0.000151006	0.000221544	0.0102993	0.0141352	0.975193	8.49529e-09	8.5e-08	rs773125	rs773125	0.989328	0.985712	RA	RPS26
txrevise_contained	SCZ	naive	ENSG00000168237.grp_2.contained.ENST00000489173	rs7622851	354	0.00100535	5.32086e-05	0.579488	0.0302805	0.389173	0.000854455	7.336e-09	rs7622851	rs11717383	0.419453	0.92781	SCZ	GLYCTK
txrevise_contained	SCZ	IFNg	ENSG00000168237.grp_2.contained.ENST00000489173	rs7622851	354	0.00121706	5.33663e-05	0.701522	0.0304939	0.266714	0.00566914	7.336e-09	rs7622851	rs11717383	0.297208	0.897399	SCZ	GLYCTK
txrevise_contained	SCZ	SL1344	ENSG00000168237.grp_2.contained.ENST00000489173	rs7622851	354	4.40985e-05	2.10468e-05	0.0254186	0.0111681	0.963348	1.79511e-07	7.336e-09	rs7622851	rs11717383	0.974516	0.98854	SCZ	GLYCTK
txrevise_contained	SCZ	IFNg_SL1344	ENSG00000168237.grp_2.contained.ENST00000489173	rs7622851	354	0.00150468	5.46571e-05	0.867303	0.0314049	0.0997328	0.000189563	7.336e-09	rs112001168	rs11717383	0.131138	0.76052	SCZ	GLYCTK
txrevise_contained	SCZ	naive	ENSG00000149930.grp_1.contained.ENST00000308893	rs11649499	412	9.22198e-06	4.4364e-07	0.807931	0.0387137	0.153345	0.000890251	1.298e-10	rs74400203	rs12691307	0.192059	0.798428	SCZ	TAOK2
txrevise_contained	SCZ	naive	ENSG00000102886.grp_2.contained.ENST00000565704	rs3935873	433	1.02666e-05	3.81648e-07	0.89947	0.0333696	0.0671493	0.0288005	1.298e-10	rs11546678	rs12691307	0.100519	0.668027	SCZ	GDPD3
txrevise_contained	SCZ	IFNg	ENSG00000149930.grp_1.contained.ENST00000308893	rs11649499	412	2.08855e-06	9.00947e-07	0.182977	0.0781925	0.738828	1.17343e-05	1.298e-10	rs201884359	rs12691307	0.81702	0.904295	SCZ	TAOK2
txrevise_contained	SCZ	IFNg	ENSG00000102886.grp_2.contained.ENST00000565704	rs3935873	433	1.02405e-05	3.89057e-07	0.897184	0.0340171	0.068788	0.0106108	1.298e-10	rs12922376	rs12691307	0.102805	0.669111	SCZ	GDPD3
txrevise_contained	SCZ	SL1344	ENSG00000149930.grp_1.contained.ENST00000308893	rs11649499	412	8.50859e-06	5.13141e-07	0.745432	0.0447461	0.209813	0.00538163	1.298e-10	rs11642046	rs12691307	0.254559	0.824221	SCZ	TAOK2
txrevise_contained	SCZ	SL1344	ENSG00000102886.grp_2.contained.ENST00000565704	rs3935873	433	9.93228e-06	4.03478e-07	0.870182	0.0352548	0.094553	0.0161716	1.298e-10	rs73530148	rs12691307	0.129808	0.728408	SCZ	GDPD3
txrevise_contained	SCZ	IFNg_SL1344	ENSG00000149930.grp_1.contained.ENST00000308893	rs11649499	412	1.00953e-05	4.73374e-07	0.884443	0.0413978	0.0741489	8.34753e-06	1.298e-10	rs13332660	rs12691307	0.115547	0.641723	SCZ	TAOK2
txrevise_contained	SCZ	IFNg_SL1344	ENSG00000102886.grp_2.contained.ENST00000565704	rs3935873	433	1.59211e-06	8.78241e-07	0.139487	0.0761596	0.784351	7.28695e-06	1.298e-10	rs11642046	rs12691307	0.860511	0.911495	SCZ	GDPD3
txrevise_contained	SCZ	naive	ENSG00000111231.grp_1.contained.ENST00000547323	rs4766500	429	0.0244964	0.000958239	0.845589	0.0329813	0.0959752	0.0301991	3.236e-07	rs75118465	rs35564692	0.128956	0.744245	SCZ	GPN3
txrevise_contained	SCZ	IFNg	ENSG00000111231.grp_1.contained.ENST00000547323	rs4766500	429	2.72911e-05	0.000964857	0.000942059	0.03234	0.965726	3.30083e-11	3.236e-07	rs4766500	rs35564692	0.998066	0.967597	SCZ	GPN3
txrevise_contained	SCZ	SL1344	ENSG00000111231.grp_1.contained.ENST00000547323	rs4766500	429	0.0239638	0.00100226	0.827203	0.0344835	0.113347	0.0043478	3.236e-07	rs7977149	rs35564692	0.14783	0.766736	SCZ	GPN3
txrevise_contained	SCZ	IFNg_SL1344	ENSG00000111231.grp_1.contained.ENST00000547323	rs4766500	429	0.0247417	0.00095637	0.854055	0.0329255	0.0873216	0.0252925	3.236e-07	rs200496964	rs35564692	0.120247	0.726185	SCZ	GPN3
txrevise_contained	SCZ	naive	ENSG00000182511.grp_2.contained.ENST00000470152	rs4702	1030	3.35192e-08	4.19466e-08	0.00800035	0.00902882	0.982971	2.8155e-08	2.298e-12	rs4702	rs4702	0.992	0.990898	SCZ	FES
txrevise_contained	SCZ	IFNg	ENSG00000182511.grp_2.contained.ENST00000470152	rs4702	1030	1.46125e-06	2.3635e-07	0.348771	0.0558164	0.595411	3.02319e-05	2.298e-12	rs11372849	rs4702	0.651227	0.91429	SCZ	FES
txrevise_contained	SCZ	SL1344	ENSG00000182511.grp_2.contained.ENST00000470152	rs4702	1030	3.51336e-06	3.57096e-07	0.838567	0.0851552	0.0762742	0.00587616	2.298e-12	rs113898256	rs4702	0.161429	0.472492	SCZ	FES
txrevise_contained	SCZ	IFNg_SL1344	ENSG00000182511.grp_2.contained.ENST00000470152	rs4702	1030	3.35793e-06	3.20927e-07	0.80147	0.0764767	0.12205	0.013244	2.298e-12	rs52828316	rs4702	0.198527	0.614779	SCZ	FES
txrevise_contained	SCZ	naive	ENSG00000158604.grp_2.contained.ENST00000289577	rs151027659;rs35408903	627	0.00156227	0.0122916	0.0118141	0.0920688	0.882263	3.99247e-09	7.072e-07	rs113959102	rs540425	0.974332	0.905506	SCZ	TMED4
txrevise_contained	SCZ	naive	ENSG00000158604.grp_2.contained.ENST00000289577	rs217372	598	0.00156243	0.012292	0.0118048	0.0919888	0.882352	3.99247e-09	7.072e-07	rs113959102	rs540425	0.974341	0.905589	SCZ	TMED4
txrevise_contained	SCZ	naive	ENSG00000158604.grp_2.contained.ENST00000289577	rs4407779	598	0.00156273	0.0122933	0.0117869	0.0918399	0.882517	3.99247e-09	7.072e-07	rs113959102	rs540425	0.974357	0.905743	SCZ	TMED4
txrevise_contained	SCZ	naive	ENSG00000158604.grp_2.contained.ENST00000289577	rs217362	593	0.00156263	0.0122926	0.0117931	0.0918893	0.882462	3.99247e-09	7.072e-07	rs113959102	rs540425	0.974352	0.905692	SCZ	TMED4
txrevise_contained	SCZ	IFNg	ENSG00000158604.grp_2.contained.ENST00000289577	rs151027659;rs35408903	627	1.34157e-05	0.0178064	0.000101451	0.133806	0.848273	3.32414e-14	7.072e-07	rs217393	rs540425	0.982079	0.863752	SCZ	TMED4
txrevise_contained	SCZ	IFNg	ENSG00000158604.grp_2.contained.ENST00000289577	rs217372	598	1.34173e-05	0.0178085	0.000101373	0.133702	0.848375	3.32414e-14	7.072e-07	rs217393	rs540425	0.982077	0.863858	SCZ	TMED4
txrevise_contained	SCZ	IFNg	ENSG00000158604.grp_2.contained.ENST00000289577	rs4407779	598	1.34204e-05	0.0178126	0.000101223	0.133503	0.84857	3.32414e-14	7.072e-07	rs217393	rs540425	0.982073	0.86406	SCZ	TMED4
txrevise_contained	SCZ	IFNg	ENSG00000158604.grp_2.contained.ENST00000289577	rs217362	593	1.34193e-05	0.0178112	0.000101275	0.133572	0.848502	3.32414e-14	7.072e-07	rs217393	rs540425	0.982074	0.86399	SCZ	TMED4
txrevise_contained	SCZ	SL1344	ENSG00000158604.grp_2.contained.ENST00000289577	rs151027659;rs35408903	627	0.000270792	0.0201049	0.00204776	0.15121	0.826367	2.26964e-11	7.072e-07	rs4407779	rs540425	0.977577	0.845322	SCZ	TMED4
txrevise_contained	SCZ	SL1344	ENSG00000158604.grp_2.contained.ENST00000289577	rs217372	598	0.00027083	0.0201072	0.00204623	0.151092	0.826484	2.26964e-11	7.072e-07	rs4407779	rs540425	0.977576	0.845442	SCZ	TMED4
txrevise_contained	SCZ	SL1344	ENSG00000158604.grp_2.contained.ENST00000289577	rs4407779	598	0.000270902	0.0201125	0.00204328	0.150872	0.826701	2.26964e-11	7.072e-07	rs4407779	rs540425	0.977573	0.845667	SCZ	TMED4
txrevise_contained	SCZ	SL1344	ENSG00000158604.grp_2.contained.ENST00000289577	rs217362	593	0.000270877	0.0201106	0.0020443	0.150947	0.826627	2.26964e-11	7.072e-07	rs4407779	rs540425	0.977574	0.84559	SCZ	TMED4
txrevise_contained	SCZ	IFNg_SL1344	ENSG00000158604.grp_2.contained.ENST00000289577	rs151027659;rs35408903	627	0.000119078	0.00675261	0.000900482	0.0501221	0.942106	1.17356e-10	7.072e-07	rs217397	rs540425	0.992228	0.949485	SCZ	TMED4
txrevise_contained	SCZ	IFNg_SL1344	ENSG00000158604.grp_2.contained.ENST00000289577	rs217372	598	0.000119084	0.00675257	0.000899726	0.0500763	0.942152	1.17356e-10	7.072e-07	rs217397	rs540425	0.992229	0.949531	SCZ	TMED4
txrevise_contained	SCZ	IFNg_SL1344	ENSG00000158604.grp_2.contained.ENST00000289577	rs4407779	598	0.000119094	0.00675318	0.00089827	0.0499938	0.942236	1.17356e-10	7.072e-07	rs217397	rs540425	0.992229	0.949615	SCZ	TMED4
txrevise_contained	SCZ	IFNg_SL1344	ENSG00000158604.grp_2.contained.ENST00000289577	rs217362	593	0.000119091	0.00675292	0.000898772	0.0500219	0.942207	1.17356e-10	7.072e-07	rs217397	rs540425	0.992229	0.949586	SCZ	TMED4
txrevise_contained	SCZ	naive	ENSG00000144567.grp_1.contained.ENST00000420189	rs3731900	630	0.000760989	0.0146688	0.00380644	0.0724647	0.908299	2.44209e-10	9.505e-07	rs3731900	rs6707588	0.980764	0.926114	SCZ	FAM134A
txrevise_contained	SCZ	naive	ENSG00000144567.grp_1.contained.ENST00000420189	rs6741247	550	0.000761029	0.0146622	0.00380623	0.0724238	0.908347	2.44209e-10	9.505e-07	rs3731900	rs6707588	0.980771	0.926156	SCZ	FAM134A
txrevise_contained	SCZ	IFNg	ENSG00000144567.grp_1.contained.ENST00000420189	rs3731900	630	0.0115043	0.0294352	0.0575439	0.146479	0.755038	2.61922e-07	9.505e-07	rs13015674	rs6707588	0.901517	0.83752	SCZ	FAM134A
txrevise_contained	SCZ	IFNg	ENSG00000144567.grp_1.contained.ENST00000420189	rs6741247	550	0.0115108	0.0293611	0.0575705	0.146092	0.755465	2.61922e-07	9.505e-07	rs13015674	rs6707588	0.901558	0.837956	SCZ	FAM134A
txrevise_contained	SCZ	SL1344	ENSG00000144567.grp_1.contained.ENST00000420189	rs3731900	630	0.0956968	0.0101045	0.478672	0.0501767	0.36535	0.000241071	9.505e-07	rs13419988	rs6707588	0.415527	0.879246	SCZ	FAM134A
txrevise_contained	SCZ	SL1344	ENSG00000144567.grp_1.contained.ENST00000420189	rs6741247	550	0.0961454	0.00938068	0.480865	0.0465498	0.367059	0.000241071	9.505e-07	rs13419988	rs6707588	0.413609	0.887455	SCZ	FAM134A
txrevise_contained	SCZ	IFNg_SL1344	ENSG00000144567.grp_1.contained.ENST00000420189	rs3731900	630	0.0724129	0.0115369	0.362206	0.0572104	0.496634	3.57749e-05	9.505e-07	rs6707361	rs6707588	0.553844	0.896703	SCZ	FAM134A
txrevise_contained	SCZ	IFNg_SL1344	ENSG00000144567.grp_1.contained.ENST00000420189	rs6741247	550	0.0727001	0.0109297	0.363605	0.0541658	0.4986	3.57749e-05	9.505e-07	rs6707361	rs6707588	0.552766	0.902009	SCZ	FAM134A
txrevise_contained	SLE	naive	ENSG00000185507.grp_1.contained.ENST00000528413	rs11246217	1020	1.5024e-06	1.58128e-07	0.817484	0.0859434	0.0965711	0.0108311	2.96791e-11	rs202091261	rs58688157	0.182515	0.529115	SLE	IRF7
txrevise_contained	SLE	naive	ENSG00000185507.grp_1.contained.ENST00000528413	rs7101726	1029	1.50149e-06	1.59154e-07	0.816984	0.0865021	0.0965121	0.0108311	2.96791e-11	rs202091261	rs58688157	0.183014	0.527347	SLE	IRF7
txrevise_contained	SLE	naive	ENSG00000185507.grp_1.contained.ENST00000528413	rs72841255	1042	1.501e-06	1.59698e-07	0.81672	0.086798	0.0964808	0.0108311	2.96791e-11	rs202091261	rs58688157	0.183279	0.526415	SLE	IRF7
txrevise_contained	SLE	IFNg	ENSG00000185507.grp_1.contained.ENST00000528413	rs11246217	1020	6.87708e-09	7.63354e-08	0.00374194	0.0405797	0.955678	6.07602e-11	2.96791e-11	rs11246217	rs58688157	0.996258	0.959268	SLE	IRF7
txrevise_contained	SLE	IFNg	ENSG00000185507.grp_1.contained.ENST00000528413	rs7101726	1029	6.87705e-09	7.63423e-08	0.00374192	0.0405835	0.955674	6.07602e-11	2.96791e-11	rs11246217	rs58688157	0.996258	0.959264	SLE	IRF7
txrevise_contained	SLE	IFNg	ENSG00000185507.grp_1.contained.ENST00000528413	rs72841255	1042	6.87703e-09	7.63469e-08	0.00374191	0.040586	0.955672	6.07602e-11	2.96791e-11	rs11246217	rs58688157	0.996258	0.959262	SLE	IRF7
txrevise_contained	SLE	SL1344	ENSG00000185507.grp_1.contained.ENST00000528413	rs11246217	1020	3.61869e-11	8.25831e-08	1.96899e-05	0.0439789	0.956001	1.37831e-15	2.96791e-11	rs35865896	rs58688157	0.99998	0.95602	SLE	IRF7
txrevise_contained	SLE	SL1344	ENSG00000185507.grp_1.contained.ENST00000528413	rs7101726	1029	3.61869e-11	8.25832e-08	1.96899e-05	0.0439789	0.956001	1.37831e-15	2.96791e-11	rs35865896	rs58688157	0.99998	0.95602	SLE	IRF7
txrevise_contained	SLE	SL1344	ENSG00000185507.grp_1.contained.ENST00000528413	rs72841255	1042	3.61869e-11	8.25832e-08	1.96899e-05	0.0439789	0.956001	1.37831e-15	2.96791e-11	rs35865896	rs58688157	0.99998	0.95602	SLE	IRF7
txrevise_contained	SLE	IFNg_SL1344	ENSG00000185507.grp_1.contained.ENST00000528413	rs11246217	1020	7.033e-09	8.94527e-08	0.00382678	0.0477243	0.948449	2.71017e-10	2.96791e-11	rs72841254	rs58688157	0.996173	0.952092	SLE	IRF7
txrevise_contained	SLE	IFNg_SL1344	ENSG00000185507.grp_1.contained.ENST00000528413	rs7101726	1029	7.03296e-09	8.94627e-08	0.00382675	0.0477298	0.948443	2.71017e-10	2.96791e-11	rs72841254	rs58688157	0.996173	0.952087	SLE	IRF7
txrevise_contained	SLE	IFNg_SL1344	ENSG00000185507.grp_1.contained.ENST00000528413	rs72841255	1042	7.03294e-09	8.94669e-08	0.00382675	0.0477321	0.948441	2.71017e-10	2.96791e-11	rs72841254	rs58688157	0.996173	0.952085	SLE	IRF7
txrevise_contained	CAD	naive	ENSG00000182511.grp_2.contained.ENST00000470152	rs4702	1030	0.000208227	0.000260579	0.0247854	0.0300722	0.944674	2.8155e-08	5.01e-08	rs4702	rs2521501	0.974746	0.969149	CAD	FES
txrevise_contained	CAD	IFNg	ENSG00000182511.grp_2.contained.ENST00000470152	rs4702	1030	0.0026838	0.00043409	0.319455	0.0510436	0.626384	3.02319e-05	5.01e-08	rs11372849	rs2521501	0.677428	0.924651	CAD	FES
txrevise_contained	CAD	SL1344	ENSG00000182511.grp_2.contained.ENST00000470152	rs4702	1030	0.00700152	0.000711631	0.833396	0.0846317	0.0742594	0.00587616	5.01e-08	rs113898256	rs2521501	0.158891	0.46736	CAD	FES
txrevise_contained	CAD	IFNg_SL1344	ENSG00000182511.grp_2.contained.ENST00000470152	rs4702	1030	0.00678928	0.000648871	0.808133	0.0771283	0.1073	0.013244	5.01e-08	rs52828316	rs2521501	0.184429	0.581799	CAD	FES
txrevise_contained	CAD	naive	ENSG00000160712.grp_2.contained.ENST00000344086	rs11265613	903	9.24815e-08	9.98716e-05	0.000191349	0.205846	0.793863	2.23824e-14	2.6e-09	rs11265613	rs6689306	0.999709	0.794094	CAD	IL6R
txrevise_contained	CAD	naive	ENSG00000160712.grp_2.contained.ENST00000344086	rs12126142	893	9.24815e-08	9.98716e-05	0.000191349	0.205846	0.793863	2.23824e-14	2.6e-09	rs11265613	rs6689306	0.999709	0.794094	CAD	IL6R
txrevise_contained	CAD	naive	ENSG00000160712.grp_2.contained.ENST00000344086	rs6686750	899	9.24815e-08	9.98716e-05	0.000191349	0.205846	0.793863	2.23824e-14	2.6e-09	rs11265613	rs6689306	0.999709	0.794094	CAD	IL6R
txrevise_contained	CAD	IFNg	ENSG00000160712.grp_2.contained.ENST00000344086	rs11265613	903	2.52607e-09	0.000156062	5.22659e-06	0.322224	0.677615	1.73796e-18	2.6e-09	rs12126142	rs6689306	0.999839	0.677724	CAD	IL6R
txrevise_contained	CAD	IFNg	ENSG00000160712.grp_2.contained.ENST00000344086	rs12126142	893	2.52607e-09	0.000156062	5.22659e-06	0.322224	0.677615	1.73796e-18	2.6e-09	rs12126142	rs6689306	0.999839	0.677724	CAD	IL6R
txrevise_contained	CAD	IFNg	ENSG00000160712.grp_2.contained.ENST00000344086	rs6686750	899	2.52607e-09	0.000156062	5.22659e-06	0.322224	0.677615	1.73796e-18	2.6e-09	rs12126142	rs6689306	0.999839	0.677724	CAD	IL6R
txrevise_contained	CAD	SL1344	ENSG00000160712.grp_2.contained.ENST00000344086	rs11265613	903	7.53543e-05	6.17897e-05	0.155912	0.12713	0.716821	6.72443e-07	2.6e-09	rs12126142	rs6689306	0.843951	0.849364	CAD	IL6R
txrevise_contained	CAD	SL1344	ENSG00000160712.grp_2.contained.ENST00000344086	rs12126142	893	7.53665e-05	6.17213e-05	0.155938	0.126988	0.716937	6.72443e-07	2.6e-09	rs12126142	rs6689306	0.843925	0.849527	CAD	IL6R
txrevise_contained	CAD	SL1344	ENSG00000160712.grp_2.contained.ENST00000344086	rs6686750	899	7.53595e-05	6.17607e-05	0.155923	0.127069	0.71687	6.72443e-07	2.6e-09	rs12126142	rs6689306	0.84394	0.849433	CAD	IL6R
txrevise_contained	CAD	IFNg_SL1344	ENSG00000160712.grp_2.contained.ENST00000344086	rs11265613	903	3.38398e-07	1.90497e-05	0.000700164	0.038454	0.960826	3.80081e-11	2.6e-09	rs6686750	rs6689306	0.99928	0.961518	CAD	IL6R
txrevise_contained	CAD	IFNg_SL1344	ENSG00000160712.grp_2.contained.ENST00000344086	rs12126142	893	3.38398e-07	1.90494e-05	0.000700164	0.0384535	0.960827	3.80081e-11	2.6e-09	rs6686750	rs6689306	0.99928	0.961519	CAD	IL6R
txrevise_contained	CAD	IFNg_SL1344	ENSG00000160712.grp_2.contained.ENST00000344086	rs6686750	899	3.38398e-07	1.90496e-05	0.000700164	0.0384539	0.960827	3.80081e-11	2.6e-09	rs6686750	rs6689306	0.99928	0.961518	CAD	IL6R
txrevise_contained	CAD	naive	ENSG00000118640.grp_1.contained.ENST00000409760	rs6547623	955	6.41247e-10	4.43442e-06	1.57031e-05	0.107699	0.89228	1.21568e-15	3.62e-10	rs60012532	rs7568458	0.99998	0.892298	CAD	VAMP8
txrevise_contained	CAD	naive	ENSG00000118640.grp_1.contained.ENST00000409760	rs7579147	959	6.41247e-10	4.43442e-06	1.57031e-05	0.107699	0.89228	1.21568e-15	3.62e-10	rs60012532	rs7568458	0.99998	0.892298	CAD	VAMP8
txrevise_contained	CAD	IFNg	ENSG00000118640.grp_1.contained.ENST00000409760	rs6547623	955	1.04539e-11	4.08551e-06	2.55998e-07	0.0991467	0.900849	8.20881e-19	3.62e-10	rs3731827	rs7568458	0.999996	0.900853	CAD	VAMP8
txrevise_contained	CAD	IFNg	ENSG00000118640.grp_1.contained.ENST00000409760	rs7579147	959	1.04539e-11	4.08551e-06	2.55998e-07	0.0991467	0.900849	8.20881e-19	3.62e-10	rs3731827	rs7568458	0.999996	0.900853	CAD	VAMP8
txrevise_contained	CAD	SL1344	ENSG00000118640.grp_1.contained.ENST00000409760	rs6547623	955	3.91354e-08	1.91785e-05	0.000958362	0.469121	0.529902	8.05707e-14	3.62e-10	rs7579147	rs7568458	0.999022	0.53042	CAD	VAMP8
txrevise_contained	CAD	SL1344	ENSG00000118640.grp_1.contained.ENST00000409760	rs7579147	959	3.91354e-08	1.91785e-05	0.000958362	0.469121	0.529902	8.05707e-14	3.62e-10	rs7579147	rs7568458	0.999022	0.53042	CAD	VAMP8
txrevise_contained	CAD	IFNg_SL1344	ENSG00000118640.grp_1.contained.ENST00000409760	rs6547623	955	3.97994e-08	2.84113e-05	0.000974622	0.695443	0.303554	1.87725e-14	3.62e-10	rs7579147	rs7568458	0.998997	0.303859	CAD	VAMP8
txrevise_contained	CAD	IFNg_SL1344	ENSG00000118640.grp_1.contained.ENST00000409760	rs7579147	959	3.97994e-08	2.84113e-05	0.000974622	0.695443	0.303554	1.87725e-14	3.62e-10	rs7579147	rs7568458	0.998997	0.303859	CAD	VAMP8
txrevise_contained	MI	naive	ENSG00000182511.grp_2.contained.ENST00000470152	rs4702	1030	0.000204367	0.000255749	0.020697	0.0249467	0.953896	2.8155e-08	7.38837e-08	rs4702	rs11372849	0.978843	0.974514	MI	FES
txrevise_contained	MI	IFNg	ENSG00000182511.grp_2.contained.ENST00000470152	rs4702	1030	0.00295716	0.000478304	0.299482	0.0477903	0.649292	3.02319e-05	7.38837e-08	rs11372849	rs11372849	0.697083	0.931442	MI	FES
txrevise_contained	MI	SL1344	ENSG00000182511.grp_2.contained.ENST00000470152	rs4702	1030	0.00814153	0.000827501	0.824522	0.0837212	0.0827878	0.00587616	7.38837e-08	rs113898256	rs11372849	0.166509	0.497197	MI	FES
txrevise_contained	MI	IFNg_SL1344	ENSG00000182511.grp_2.contained.ENST00000470152	rs4702	1030	0.00795487	0.00076027	0.805618	0.0768865	0.10878	0.013244	7.38837e-08	rs52828316	rs11372849	0.185666	0.585889	MI	FES
txrevise_contained	MI	naive	ENSG00000160712.grp_2.contained.ENST00000344086	rs11265613	903	4.05258e-06	0.00437642	0.000328885	0.354525	0.640766	2.23824e-14	1.17903e-07	rs11265613	rs12118721	0.995291	0.643798	MI	IL6R
txrevise_contained	MI	naive	ENSG00000160712.grp_2.contained.ENST00000344086	rs12126142	893	4.05258e-06	0.00437642	0.000328884	0.354524	0.640767	2.23824e-14	1.17903e-07	rs11265613	rs12118721	0.995291	0.643799	MI	IL6R
txrevise_contained	MI	naive	ENSG00000160712.grp_2.contained.ENST00000344086	rs6686750	899	4.05258e-06	0.00437642	0.000328884	0.354524	0.640766	2.23824e-14	1.17903e-07	rs11265613	rs12118721	0.995291	0.643798	MI	IL6R
txrevise_contained	MI	IFNg	ENSG00000160712.grp_2.contained.ENST00000344086	rs11265613	903	1.52895e-07	0.00944593	1.24081e-05	0.766354	0.224187	1.73796e-18	1.17903e-07	rs12126142	rs12118721	0.990542	0.226328	MI	IL6R
txrevise_contained	MI	IFNg	ENSG00000160712.grp_2.contained.ENST00000344086	rs12126142	893	1.52895e-07	0.00944595	1.24081e-05	0.766354	0.224188	1.73796e-18	1.17903e-07	rs12126142	rs12118721	0.990541	0.226328	MI	IL6R
txrevise_contained	MI	IFNg	ENSG00000160712.grp_2.contained.ENST00000344086	rs6686750	899	1.52895e-07	0.00944594	1.24081e-05	0.766354	0.224187	1.73796e-18	1.17903e-07	rs12126142	rs12118721	0.990542	0.226328	MI	IL6R
txrevise_contained	MI	SL1344	ENSG00000160712.grp_2.contained.ENST00000344086	rs11265613	903	0.00241026	0.00197639	0.195604	0.159753	0.640257	6.72443e-07	1.17903e-07	rs12126142	rs12118721	0.80001	0.800312	MI	IL6R
txrevise_contained	MI	SL1344	ENSG00000160712.grp_2.contained.ENST00000344086	rs12126142	893	0.00241076	0.00197429	0.195643	0.159582	0.64039	6.72443e-07	1.17903e-07	rs12126142	rs12118721	0.799971	0.800516	MI	IL6R
txrevise_contained	MI	SL1344	ENSG00000160712.grp_2.contained.ENST00000344086	rs6686750	899	0.00241048	0.0019755	0.19562	0.15968	0.640314	6.72443e-07	1.17903e-07	rs12126142	rs12118721	0.799994	0.800398	MI	IL6R
txrevise_contained	MI	IFNg_SL1344	ENSG00000160712.grp_2.contained.ENST00000344086	rs11265613	903	7.84926e-06	0.000441865	0.000637002	0.0348952	0.964018	3.80081e-11	1.17903e-07	rs6686750	rs12118721	0.998913	0.965067	MI	IL6R
txrevise_contained	MI	IFNg_SL1344	ENSG00000160712.grp_2.contained.ENST00000344086	rs12126142	893	7.84927e-06	0.000441859	0.000637001	0.0348947	0.964019	3.80081e-11	1.17903e-07	rs6686750	rs12118721	0.998913	0.965067	MI	IL6R
txrevise_contained	MI	IFNg_SL1344	ENSG00000160712.grp_2.contained.ENST00000344086	rs6686750	899	7.84926e-06	0.000441863	0.000637001	0.0348951	0.964018	3.80081e-11	1.17903e-07	rs6686750	rs12118721	0.998913	0.965067	MI	IL6R
txrevise_contained	MI	naive	ENSG00000059378.grp_2.contained.ENST00000489383	rs2269996	744	0.000424091	0.0012466	0.00832497	0.0235045	0.9665	3.19185e-11	3.9163e-07	rs757835	rs3735352	0.990004	0.976258	MI	PARP12
txrevise_contained	MI	IFNg	ENSG00000059378.grp_2.contained.ENST00000489383	rs2269996	744	6.89943e-07	0.00112578	1.35437e-05	0.0211214	0.977739	4.66559e-20	3.9163e-07	rs757835	rs3735352	0.99886	0.978854	MI	PARP12
txrevise_contained	MI	SL1344	ENSG00000059378.grp_2.contained.ENST00000489383	rs2269996	744	9.80725e-06	0.00113193	0.000192518	0.0212426	0.977423	1.82436e-16	3.9163e-07	rs757835	rs3735352	0.998666	0.978729	MI	PARP12
txrevise_contained	MI	IFNg_SL1344	ENSG00000059378.grp_2.contained.ENST00000489383	rs2269996	744	6.22777e-06	0.00116683	0.000122252	0.0219282	0.976776	3.89421e-17	3.9163e-07	rs757835	rs3735352	0.998705	0.978043	MI	PARP12
txrevise_contained	MI	naive	ENSG00000033627.grp_1.contained.ENST00000589759	rs139012811	623	0.00351997	0.00533754	0.0341738	0.0509136	0.906055	1.90471e-07	3.4012e-07	rs139012811	rs4796663	0.956969	0.946797	MI	ATP6V0A1
txrevise_contained	MI	naive	ENSG00000033627.grp_1.contained.ENST00000589759	rs12453490	583	0.00342182	0.00597264	0.0345629	0.0594314	0.896611	1.90471e-07	3.4012e-07	rs139012811	rs4796663	0.956043	0.937836	MI	ATP6V0A1
txrevise_contained	MI	IFNg	ENSG00000033627.grp_1.contained.ENST00000589759	rs139012811	623	0.00664536	0.00795259	0.0645167	0.0763634	0.844522	7.28077e-07	3.4012e-07	rs12453490	rs4796663	0.920885	0.917076	MI	ATP6V0A1
txrevise_contained	MI	IFNg	ENSG00000033627.grp_1.contained.ENST00000589759	rs12453490	583	0.00631476	0.00897994	0.0637837	0.0898729	0.831049	7.28077e-07	3.4012e-07	rs12453490	rs4796663	0.920922	0.90241	MI	ATP6V0A1
txrevise_contained	MI	SL1344	ENSG00000033627.grp_1.contained.ENST00000589759	rs139012811	623	0.0477809	0.00640406	0.463882	0.0617538	0.420179	0.000140394	3.4012e-07	rs56266811	rs4796663	0.481933	0.871862	MI	ATP6V0A1
txrevise_contained	MI	SL1344	ENSG00000033627.grp_1.contained.ENST00000589759	rs12453490	583	0.0456969	0.00695411	0.461572	0.0698257	0.415951	0.00011146	3.4012e-07	rs3760385	rs4796663	0.485777	0.85626	MI	ATP6V0A1
txrevise_contained	MI	IFNg_SL1344	ENSG00000033627.grp_1.contained.ENST00000589759	rs139012811	623	0.0642035	0.00570399	0.623321	0.0551257	0.251645	0.0020133	3.4012e-07	rs2170711	rs4796663	0.306771	0.820304	MI	ATP6V0A1
txrevise_contained	MI	IFNg_SL1344	ENSG00000033627.grp_1.contained.ENST00000589759	rs12453490	583	0.061826	0.0057247	0.624488	0.0575732	0.250388	0.0020133	3.4012e-07	rs2170711	rs4796663	0.307961	0.81305	MI	ATP6V0A1
txrevise_contained	CRP	naive	ENSG00000160712.grp_2.contained.ENST00000344086	rs11265613	946	8.70223e-18	9.95567e-15	3.04403e-05	0.0338587	0.966111	2.23824e-14	1.99e-18	rs11265613	rs4393147	0.99997	0.96614	CRP	IL6R
txrevise_contained	CRP	naive	ENSG00000160712.grp_2.contained.ENST00000344086	rs12126142	937	8.70223e-18	9.95567e-15	3.04403e-05	0.0338587	0.966111	2.23824e-14	1.99e-18	rs11265613	rs4393147	0.99997	0.96614	CRP	IL6R
txrevise_contained	CRP	naive	ENSG00000160712.grp_2.contained.ENST00000344086	rs6686750	942	8.70223e-18	9.95567e-15	3.04403e-05	0.0338587	0.966111	2.23824e-14	1.99e-18	rs11265613	rs4393147	0.99997	0.96614	CRP	IL6R
txrevise_contained	CRP	IFNg	ENSG00000160712.grp_2.contained.ENST00000344086	rs11265613	946	6.02767e-19	3.7408e-14	2.10847e-06	0.129983	0.870015	1.73796e-18	1.99e-18	rs12126142	rs4393147	0.999998	0.870017	CRP	IL6R
txrevise_contained	CRP	IFNg	ENSG00000160712.grp_2.contained.ENST00000344086	rs12126142	937	6.02767e-19	3.7408e-14	2.10847e-06	0.129983	0.870015	1.73796e-18	1.99e-18	rs12126142	rs4393147	0.999998	0.870017	CRP	IL6R
txrevise_contained	CRP	IFNg	ENSG00000160712.grp_2.contained.ENST00000344086	rs6686750	942	6.02767e-19	3.7408e-14	2.10847e-06	0.129983	0.870015	1.73796e-18	1.99e-18	rs12126142	rs4393147	0.999998	0.870017	CRP	IL6R
txrevise_contained	CRP	SL1344	ENSG00000160712.grp_2.contained.ENST00000344086	rs11265613	946	1.18779e-14	1.07216e-14	0.0415489	0.0365822	0.921869	6.72443e-07	1.99e-18	rs12126142	rs4393147	0.958451	0.961832	CRP	IL6R
txrevise_contained	CRP	SL1344	ENSG00000160712.grp_2.contained.ENST00000344086	rs12126142	937	1.18783e-14	1.07123e-14	0.0415503	0.0365497	0.9219	6.72443e-07	1.99e-18	rs12126142	rs4393147	0.95845	0.961866	CRP	IL6R
txrevise_contained	CRP	SL1344	ENSG00000160712.grp_2.contained.ENST00000344086	rs6686750	942	1.18782e-14	1.07166e-14	0.0415496	0.0365645	0.921886	6.72443e-07	1.99e-18	rs12126142	rs4393147	0.95845	0.96185	CRP	IL6R
txrevise_contained	CRP	IFNg_SL1344	ENSG00000160712.grp_2.contained.ENST00000344086	rs11265613	946	9.3339e-16	5.42621e-14	0.00326499	0.189	0.807735	3.80081e-11	1.99e-18	rs6686750	rs4393147	0.996735	0.810381	CRP	IL6R
txrevise_contained	CRP	IFNg_SL1344	ENSG00000160712.grp_2.contained.ENST00000344086	rs12126142	937	9.33392e-16	5.42616e-14	0.00326499	0.188999	0.807736	3.80081e-11	1.99e-18	rs6686750	rs4393147	0.996735	0.810382	CRP	IL6R
txrevise_contained	CRP	IFNg_SL1344	ENSG00000160712.grp_2.contained.ENST00000344086	rs6686750	942	9.33391e-16	5.42619e-14	0.00326499	0.189	0.807735	3.80081e-11	1.99e-18	rs6686750	rs4393147	0.996735	0.810381	CRP	IL6R
txrevise_contained	HDL	naive	ENSG00000187116.grp_1.contained.ENST00000489504	rs34574962	819	0.00272835	0.000255265	0.226809	0.0204706	0.749736	3.20466e-06	1.18e-08	rs67594749	rs34574962	0.770207	0.973422	HDL	LILRA5
txrevise_contained	HDL	IFNg	ENSG00000187116.grp_1.contained.ENST00000489504	rs34574962	819	0.00609212	0.000497679	0.506442	0.0409263	0.446042	0.000119091	1.18e-08	rs67594749	rs34574962	0.486968	0.915957	HDL	LILRA5
txrevise_contained	HDL	SL1344	ENSG00000187116.grp_1.contained.ENST00000489504	rs34574962	819	0.00097715	0.000327668	0.0812311	0.0263481	0.891116	2.62685e-09	1.18e-08	rs67594749	rs34574962	0.917464	0.971282	HDL	LILRA5
txrevise_contained	HDL	IFNg_SL1344	ENSG00000187116.grp_1.contained.ENST00000489504	rs34574962	819	0.000171373	2.74053e-05	0.0142464	0.00129396	0.984261	6.26499e-09	1.18e-08	rs34574962	rs34574962	0.985555	0.998687	HDL	LILRA5
txrevise_contained	IL6	naive	ENSG00000160712.grp_2.contained.ENST00000344086	rs11265613	946	7.90707e-25	9.04598e-22	2.04098e-05	0.0223719	0.977608	2.23824e-14	1.47e-25	rs11265613	rs12126142	0.99998	0.977628	IL6	IL6R
txrevise_contained	IL6	naive	ENSG00000160712.grp_2.contained.ENST00000344086	rs12126142	937	7.90707e-25	9.04598e-22	2.04098e-05	0.0223719	0.977608	2.23824e-14	1.47e-25	rs11265613	rs12126142	0.99998	0.977628	IL6	IL6R
txrevise_contained	IL6	naive	ENSG00000160712.grp_2.contained.ENST00000344086	rs6686750	942	7.90707e-25	9.04598e-22	2.04098e-05	0.0223719	0.977608	2.23824e-14	1.47e-25	rs11265613	rs12126142	0.99998	0.977628	IL6	IL6R
txrevise_contained	IL6	IFNg	ENSG00000160712.grp_2.contained.ENST00000344086	rs11265613	946	9.14103e-27	5.67296e-22	2.35949e-07	0.0136567	0.986343	1.73796e-18	1.47e-25	rs12126142	rs12126142	1	0.986343	IL6	IL6R
txrevise_contained	IL6	IFNg	ENSG00000160712.grp_2.contained.ENST00000344086	rs12126142	937	9.14103e-27	5.67296e-22	2.35949e-07	0.0136567	0.986343	1.73796e-18	1.47e-25	rs12126142	rs12126142	1	0.986343	IL6	IL6R
txrevise_contained	IL6	IFNg	ENSG00000160712.grp_2.contained.ENST00000344086	rs6686750	942	9.14103e-27	5.67296e-22	2.35949e-07	0.0136567	0.986343	1.73796e-18	1.47e-25	rs12126142	rs12126142	1	0.986343	IL6	IL6R
txrevise_contained	IL6	SL1344	ENSG00000160712.grp_2.contained.ENST00000344086	rs11265613	946	1.57314e-21	1.41999e-21	0.0406058	0.0357292	0.923665	6.72443e-07	1.47e-25	rs12126142	rs12126142	0.959394	0.962759	IL6	IL6R
txrevise_contained	IL6	SL1344	ENSG00000160712.grp_2.contained.ENST00000344086	rs12126142	937	1.57319e-21	1.41876e-21	0.0406072	0.0356973	0.923696	6.72443e-07	1.47e-25	rs12126142	rs12126142	0.959393	0.962792	IL6	IL6R
txrevise_contained	IL6	SL1344	ENSG00000160712.grp_2.contained.ENST00000344086	rs6686750	942	1.57316e-21	1.41932e-21	0.0406065	0.0357119	0.923682	6.72443e-07	1.47e-25	rs12126142	rs12126142	0.959393	0.962777	IL6	IL6R
txrevise_contained	IL6	IFNg_SL1344	ENSG00000160712.grp_2.contained.ENST00000344086	rs11265613	946	7.50789e-23	4.36467e-21	0.00193794	0.111775	0.886287	3.80081e-11	1.47e-25	rs6686750	rs12126142	0.998062	0.888008	IL6	IL6R
txrevise_contained	IL6	IFNg_SL1344	ENSG00000160712.grp_2.contained.ENST00000344086	rs12126142	937	7.5079e-23	4.36463e-21	0.00193794	0.111774	0.886288	3.80081e-11	1.47e-25	rs6686750	rs12126142	0.998062	0.888009	IL6	IL6R
txrevise_contained	IL6	IFNg_SL1344	ENSG00000160712.grp_2.contained.ENST00000344086	rs6686750	942	7.50789e-23	4.36465e-21	0.00193794	0.111774	0.886288	3.80081e-11	1.47e-25	rs6686750	rs12126142	0.998062	0.888009	IL6	IL6R
txrevise_contained	PLT	naive	ENSG00000007341.grp_1.contained.ENST00000361846	rs12728001	693	4.00092e-06	0.00358319	7.3714e-05	0.0650865	0.931253	1.76252e-14	7.95e-07	rs351372	rs902289	0.996339	0.934674	PLT	ST7L
txrevise_contained	PLT	naive	ENSG00000007341.grp_1.contained.ENST00000361846	rs3013431	754	4.00088e-06	0.00358302	7.37266e-05	0.0650952	0.931244	1.76252e-14	7.95e-07	rs351372	rs902289	0.996339	0.934666	PLT	ST7L
txrevise_contained	PLT	IFNg	ENSG00000007341.grp_1.contained.ENST00000361846	rs12728001	693	0.00711903	0.00526627	0.131163	0.0962671	0.760184	2.04545e-08	7.95e-07	rs3013431	rs902289	0.856452	0.887598	PLT	ST7L
txrevise_contained	PLT	IFNg	ENSG00000007341.grp_1.contained.ENST00000361846	rs3013431	754	0.00711853	0.00526731	0.131177	0.0963037	0.760133	2.04545e-08	7.95e-07	rs3013431	rs902289	0.856437	0.887553	PLT	ST7L
txrevise_contained	PLT	SL1344	ENSG00000007341.grp_1.contained.ENST00000361846	rs12728001	693	0.0301867	0.0037252	0.556168	0.0682926	0.341628	0.00121908	7.95e-07	rs36018342	rs902289	0.40992	0.8334	PLT	ST7L
txrevise_contained	PLT	SL1344	ENSG00000007341.grp_1.contained.ENST00000361846	rs3013431	754	0.0303217	0.00350549	0.558756	0.0642546	0.343162	0.00121908	7.95e-07	rs36018342	rs902289	0.407417	0.842288	PLT	ST7L
txrevise_contained	PLT	IFNg_SL1344	ENSG00000007341.grp_1.contained.ENST00000361846	rs12728001	693	0.0359618	0.00306913	0.662571	0.0563044	0.242093	0.00335627	7.95e-07	rs351372	rs902289	0.298398	0.811311	PLT	ST7L
txrevise_contained	PLT	IFNg_SL1344	ENSG00000007341.grp_1.contained.ENST00000361846	rs3013431	754	0.0357622	0.00333059	0.659012	0.0611341	0.240762	0.00335627	7.95e-07	rs351372	rs902289	0.301896	0.797499	PLT	ST7L
txrevise_contained	TC	naive	ENSG00000113161.grp_2.contained.ENST00000343975	rs3846662	788	9.31424e-18	1.41839e-14	9.26588e-06	0.0131234	0.986867	2.2695e-16	3.83e-18	rs3846662	rs12916	0.999991	0.986877	TC	HMGCR
txrevise_contained	TC	naive	ENSG00000113161.grp_2.contained.ENST00000511206	rs12916	784	1.23074e-15	2.1056e-14	0.00122435	0.0199678	0.978808	1.14475e-11	3.83e-18	rs3846662	rs12916	0.998776	0.980008	TC	HMGCR
txrevise_contained	TC	naive	ENSG00000113161.grp_2.contained.ENST00000343975	rs12916	784	9.31424e-18	1.41839e-14	9.26588e-06	0.0131234	0.986867	2.2695e-16	3.83e-18	rs3846662	rs12916	0.999991	0.986877	TC	HMGCR
txrevise_contained	TC	IFNg	ENSG00000113161.grp_2.contained.ENST00000343975	rs3846662	788	7.04254e-16	4.1092e-14	0.000700598	0.0399193	0.95938	2.06891e-13	3.83e-18	rs3846662	rs12916	0.999299	0.960053	TC	HMGCR
txrevise_contained	TC	IFNg	ENSG00000113161.grp_2.contained.ENST00000511206	rs12916	784	3.50414e-15	2.93888e-14	0.00348595	0.028268	0.968246	1.67434e-11	3.83e-18	rs3846662	rs12916	0.996514	0.971633	TC	HMGCR
txrevise_contained	TC	IFNg	ENSG00000113161.grp_2.contained.ENST00000343975	rs12916	784	7.04254e-16	4.10918e-14	0.000700598	0.0399191	0.95938	2.06891e-13	3.83e-18	rs3846662	rs12916	0.999299	0.960053	TC	HMGCR
txrevise_contained	TC	SL1344	ENSG00000113161.grp_2.contained.ENST00000343975	rs3846662	788	2.29424e-13	3.77039e-14	0.228232	0.0367731	0.734994	4.08386e-06	3.83e-18	rs12916	rs12916	0.771768	0.952352	TC	HMGCR
txrevise_contained	TC	SL1344	ENSG00000113161.grp_2.contained.ENST00000511206	rs12916	784	2.12869e-13	4.01411e-14	0.211764	0.0391837	0.749052	3.26579e-06	3.83e-18	rs12916	rs12916	0.788236	0.950289	TC	HMGCR
txrevise_contained	TC	SL1344	ENSG00000113161.grp_2.contained.ENST00000343975	rs12916	784	2.29419e-13	3.77219e-14	0.228228	0.0367911	0.734981	4.08386e-06	3.83e-18	rs12916	rs12916	0.771772	0.952329	TC	HMGCR
txrevise_contained	TC	IFNg_SL1344	ENSG00000113161.grp_2.contained.ENST00000343975	rs3846662	788	6.5265e-14	3.17299e-14	0.0649261	0.0306607	0.904413	2.12979e-07	3.83e-18	rs12916	rs12916	0.935074	0.96721	TC	HMGCR
txrevise_contained	TC	IFNg_SL1344	ENSG00000113161.grp_2.contained.ENST00000511206	rs12916	784	1.54937e-13	3.99712e-14	0.154132	0.0389568	0.806911	2.39384e-06	3.83e-18	rs12916	rs12916	0.845868	0.953945	TC	HMGCR
txrevise_contained	TC	IFNg_SL1344	ENSG00000113161.grp_2.contained.ENST00000343975	rs12916	784	6.52618e-14	3.17774e-14	0.0649229	0.0307081	0.904369	2.12979e-07	3.83e-18	rs12916	rs12916	0.935077	0.96716	TC	HMGCR
txrevise_contained	TG	naive	ENSG00000130203.grp_2.contained.ENST00000434152	rs157580	849	1.4239e-25	2.02505e-26	0.266892	0.0372612	0.695847	7.35202e-06	7.71e-31	rs157580	rs439401	0.733108	0.949174	TG	APOE
txrevise_contained	TG	naive	ENSG00000130203.grp_2.contained.ENST00000434152	rs440446	888	1.4228e-25	2.06466e-26	0.266686	0.0380042	0.69531	7.35202e-06	7.71e-31	rs157580	rs439401	0.733314	0.948175	TG	APOE
txrevise_contained	TG	IFNg	ENSG00000130203.grp_2.contained.ENST00000434152	rs157580	849	1.80932e-27	2.05102e-26	0.00339134	0.0374846	0.959124	2.41061e-12	7.71e-31	rs440446	rs439401	0.996609	0.962388	TG	APOE
txrevise_contained	TG	IFNg	ENSG00000130203.grp_2.contained.ENST00000434152	rs440446	888	1.8093e-27	2.05155e-26	0.00339131	0.0374947	0.959114	2.41061e-12	7.71e-31	rs440446	rs439401	0.996609	0.962378	TG	APOE
txrevise_contained	TG	SL1344	ENSG00000130203.grp_2.contained.ENST00000434152	rs157580	849	2.59022e-25	9.36181e-26	0.485503	0.175136	0.339361	4.16464e-08	7.71e-31	rs440446	rs439401	0.514497	0.659598	TG	APOE
txrevise_contained	TG	SL1344	ENSG00000130203.grp_2.contained.ENST00000434152	rs440446	888	2.58519e-25	9.4471e-26	0.484562	0.176735	0.338703	4.16464e-08	7.71e-31	rs440446	rs439401	0.515438	0.657117	TG	APOE
txrevise_contained	TG	IFNg_SL1344	ENSG00000130203.grp_2.contained.ENST00000434152	rs157580	849	2.65308e-25	9.20402e-26	0.497286	0.172187	0.330526	4.06612e-08	7.71e-31	rs440446	rs439401	0.502714	0.657485	TG	APOE
txrevise_contained	TG	IFNg_SL1344	ENSG00000130203.grp_2.contained.ENST00000434152	rs440446	888	2.64611e-25	9.32006e-26	0.495979	0.174363	0.329658	4.06612e-08	7.71e-31	rs440446	rs439401	0.504021	0.654056	TG	APOE
txrevise_contained	UA	naive	ENSG00000109667.grp_1.contained.ENST00000506839	rs11723439	1527	5.94071e-108	4.47849e-107	0.012587	0.0939959	0.893417	1.93409e-10	3e-112	rs11723439	rs5028843	0.987413	0.904806	UA	SLC2A9
txrevise_contained	UA	IFNg	ENSG00000109667.grp_1.contained.ENST00000506839	rs11723439	1527	1.08238e-106	1.08684e-106	0.229331	0.229736	0.540933	6.0312e-06	3e-112	rs7696983	rs5028843	0.770669	0.7019	UA	SLC2A9
txrevise_contained	UA	SL1344	ENSG00000109667.grp_1.contained.ENST00000506839	rs11723439	1527	2.84344e-106	7.38456e-107	0.602462	0.156221	0.241317	0.000959977	3e-112	rs6856430	rs5028843	0.397538	0.607028	UA	SLC2A9
txrevise_contained	UA	IFNg_SL1344	ENSG00000109667.grp_1.contained.ENST00000506839	rs11723439	1527	3.84306e-106	5.62407e-107	0.814258	0.119095	0.0666473	0.00833577	3e-112	rs201721701	rs5028843	0.185742	0.358816	UA	SLC2A9
txrevise_contained	LDL	naive	ENSG00000113161.grp_2.contained.ENST00000343975	rs3846662	788	1.96505e-17	2.99241e-14	3.23912e-06	0.00393653	0.99606	2.2695e-16	9.47e-18	rs3846662	rs12916	0.999997	0.996063	LDL	HMGCR
txrevise_contained	LDL	naive	ENSG00000113161.grp_2.contained.ENST00000511206	rs12916	784	3.28062e-15	5.6126e-14	0.000540768	0.00826043	0.991199	1.14475e-11	9.47e-18	rs3846662	rs12916	0.999459	0.991735	LDL	HMGCR
txrevise_contained	LDL	naive	ENSG00000113161.grp_2.contained.ENST00000343975	rs12916	784	1.96505e-17	2.99241e-14	3.23912e-06	0.00393653	0.99606	2.2695e-16	9.47e-18	rs3846662	rs12916	0.999997	0.996063	LDL	HMGCR
txrevise_contained	LDL	IFNg	ENSG00000113161.grp_2.contained.ENST00000343975	rs3846662	788	1.49795e-15	8.74026e-14	0.000246917	0.0134208	0.986332	2.06891e-13	9.47e-18	rs3846662	rs12916	0.999753	0.986576	LDL	HMGCR
txrevise_contained	LDL	IFNg	ENSG00000113161.grp_2.contained.ENST00000511206	rs12916	784	7.95906e-15	6.67517e-14	0.00131195	0.0100145	0.988674	1.67434e-11	9.47e-18	rs3846662	rs12916	0.998688	0.989972	LDL	HMGCR
txrevise_contained	LDL	IFNg	ENSG00000113161.grp_2.contained.ENST00000343975	rs12916	784	1.49795e-15	8.74021e-14	0.000246917	0.0134207	0.986332	2.06891e-13	9.47e-18	rs3846662	rs12916	0.999753	0.986576	LDL	HMGCR
txrevise_contained	LDL	SL1344	ENSG00000113161.grp_2.contained.ENST00000343975	rs3846662	788	7.55509e-13	1.24162e-13	0.124536	0.0196106	0.855854	4.08386e-06	9.47e-18	rs12916	rs12916	0.875464	0.9776	LDL	HMGCR
txrevise_contained	LDL	SL1344	ENSG00000113161.grp_2.contained.ENST00000511206	rs12916	784	6.9613e-13	1.3127e-13	0.114748	0.0207737	0.864478	3.26579e-06	9.47e-18	rs12916	rs12916	0.885252	0.976534	LDL	HMGCR
txrevise_contained	LDL	SL1344	ENSG00000113161.grp_2.contained.ENST00000343975	rs12916	784	7.55502e-13	1.24222e-13	0.124534	0.0196205	0.855845	4.08386e-06	9.47e-18	rs12916	rs12916	0.875466	0.977588	LDL	HMGCR
txrevise_contained	LDL	IFNg_SL1344	ENSG00000113161.grp_2.contained.ENST00000343975	rs3846662	788	2.05696e-13	1.00003e-13	0.0339063	0.0155337	0.95056	2.12979e-07	9.47e-18	rs12916	rs12916	0.966094	0.983921	LDL	HMGCR
txrevise_contained	LDL	IFNg_SL1344	ENSG00000113161.grp_2.contained.ENST00000511206	rs12916	784	5.67515e-13	1.4641e-13	0.0935473	0.0232505	0.883202	2.39384e-06	9.47e-18	rs12916	rs12916	0.906453	0.97435	LDL	HMGCR
txrevise_contained	LDL	IFNg_SL1344	ENSG00000113161.grp_2.contained.ENST00000343975	rs12916	784	2.05691e-13	1.00156e-13	0.0339054	0.0155588	0.950536	2.12979e-07	9.47e-18	rs12916	rs12916	0.966095	0.983895	LDL	HMGCR
txrevise_contained	CAD_2017	naive	ENSG00000182511.grp_2.contained.ENST00000470152	rs4702	992	1.07244e-08	1.33815e-08	0.045563	0.0559534	0.898484	2.8155e-08	6.279e-13	rs4702	rs11330240	0.954437	0.941375	CAD	FES
txrevise_contained	CAD_2017	IFNg	ENSG00000182511.grp_2.contained.ENST00000470152	rs4702	992	8.92832e-08	1.40851e-08	0.379322	0.0592795	0.561398	3.02319e-05	6.279e-13	rs11372849	rs11330240	0.620678	0.904492	CAD	FES
txrevise_contained	CAD_2017	SL1344	ENSG00000182511.grp_2.contained.ENST00000470152	rs4702	992	1.99239e-07	1.95656e-08	0.846472	0.0830544	0.0704735	0.00587616	6.279e-13	rs113898256	rs11330240	0.153528	0.459027	CAD	FES
txrevise_contained	CAD_2017	IFNg_SL1344	ENSG00000182511.grp_2.contained.ENST00000470152	rs4702	992	1.92498e-07	1.76995e-08	0.817832	0.0750897	0.107078	0.013244	6.279e-13	rs52828316	rs11330240	0.182168	0.587799	CAD	FES
txrevise_contained	CAD_2017	naive	ENSG00000059378.grp_2.contained.ENST00000489383	rs2269996	708	0.000757285	0.00205321	0.00840158	0.021812	0.966976	3.19185e-11	4.881e-07	rs757835	rs2286198	0.988788	0.977941	CAD	PARP12
txrevise_contained	CAD_2017	IFNg	ENSG00000059378.grp_2.contained.ENST00000489383	rs2269996	708	1.12686e-06	0.00182789	1.25017e-05	0.0193004	0.978858	4.66559e-20	4.881e-07	rs757835	rs2286198	0.998158	0.980664	CAD	PARP12
txrevise_contained	CAD_2017	SL1344	ENSG00000059378.grp_2.contained.ENST00000489383	rs2269996	708	1.67309e-05	0.00187564	0.000185618	0.0198309	0.978091	1.82436e-16	4.881e-07	rs757835	rs2286198	0.997922	0.980128	CAD	PARP12
txrevise_contained	CAD_2017	IFNg_SL1344	ENSG00000059378.grp_2.contained.ENST00000489383	rs2269996	708	1.04093e-05	0.0019112	0.000115484	0.0202258	0.977737	3.89421e-17	4.881e-07	rs757835	rs2286198	0.997963	0.979733	CAD	PARP12
txrevise_contained	CAD_2017	naive	ENSG00000160712.grp_2.contained.ENST00000344086	rs11265613	853	2.85573e-08	3.08092e-05	0.000396501	0.427195	0.572377	2.23824e-14	2.992e-10	rs11265613	rs6689306	0.999573	0.572622	CAD	IL6R
txrevise_contained	CAD_2017	naive	ENSG00000160712.grp_2.contained.ENST00000344086	rs12126142	844	2.85573e-08	3.08092e-05	0.000396501	0.427195	0.572377	2.23824e-14	2.992e-10	rs11265613	rs6689306	0.999573	0.572622	CAD	IL6R
txrevise_contained	CAD_2017	naive	ENSG00000160712.grp_2.contained.ENST00000344086	rs6686750	849	2.85573e-08	3.08092e-05	0.000396501	0.427195	0.572377	2.23824e-14	2.992e-10	rs11265613	rs6689306	0.999573	0.572622	CAD	IL6R
txrevise_contained	CAD_2017	IFNg	ENSG00000160712.grp_2.contained.ENST00000344086	rs11265613	853	1.07798e-09	6.65391e-05	1.49672e-05	0.923781	0.0761377	1.73796e-18	2.992e-10	rs12126142	rs6689306	0.999918	0.0761439	CAD	IL6R
txrevise_contained	CAD_2017	IFNg	ENSG00000160712.grp_2.contained.ENST00000344086	rs12126142	844	1.07798e-09	6.65391e-05	1.49672e-05	0.923781	0.0761377	1.73796e-18	2.992e-10	rs12126142	rs6689306	0.999918	0.0761439	CAD	IL6R
txrevise_contained	CAD_2017	IFNg	ENSG00000160712.grp_2.contained.ENST00000344086	rs6686750	849	1.07798e-09	6.65391e-05	1.49672e-05	0.923781	0.0761377	1.73796e-18	2.992e-10	rs12126142	rs6689306	0.999918	0.0761439	CAD	IL6R
txrevise_contained	CAD_2017	SL1344	ENSG00000160712.grp_2.contained.ENST00000344086	rs11265613	853	1.39741e-05	1.12677e-05	0.194022	0.155795	0.650157	6.72443e-07	2.992e-10	rs12126142	rs6689306	0.805953	0.806694	CAD	IL6R
txrevise_contained	CAD_2017	SL1344	ENSG00000160712.grp_2.contained.ENST00000344086	rs12126142	844	1.39767e-05	1.12563e-05	0.194058	0.155637	0.650279	6.72443e-07	2.992e-10	rs12126142	rs6689306	0.805916	0.806882	CAD	IL6R
txrevise_contained	CAD_2017	SL1344	ENSG00000160712.grp_2.contained.ENST00000344086	rs6686750	849	1.39753e-05	1.12625e-05	0.194039	0.155723	0.650213	6.72443e-07	2.992e-10	rs12126142	rs6689306	0.805936	0.80678	CAD	IL6R
txrevise_contained	CAD_2017	IFNg_SL1344	ENSG00000160712.grp_2.contained.ENST00000344086	rs11265613	853	4.81048e-08	2.70259e-06	0.000667908	0.0365612	0.962768	3.80081e-11	2.992e-10	rs6686750	rs6689306	0.999329	0.963414	CAD	IL6R
txrevise_contained	CAD_2017	IFNg_SL1344	ENSG00000160712.grp_2.contained.ENST00000344086	rs12126142	844	4.81048e-08	2.70256e-06	0.000667908	0.0365608	0.962769	3.80081e-11	2.992e-10	rs6686750	rs6689306	0.999329	0.963415	CAD	IL6R
txrevise_contained	CAD_2017	IFNg_SL1344	ENSG00000160712.grp_2.contained.ENST00000344086	rs6686750	849	4.81048e-08	2.70258e-06	0.000667908	0.036561	0.962768	3.80081e-11	2.992e-10	rs6686750	rs6689306	0.999329	0.963414	CAD	IL6R
leafcutter	AD	naive	19:51225155:51225803:clu_37833	rs12459419	802	1.05551e-10	5.50564e-05	4.99854e-09	0.00160895	0.998336	7.97541e-24	5.12e-08	rs3865444	rs3865444	0.999945	0.998391	AD	CD33
leafcutter	AD	naive	19:51235663:51239518:clu_37834	rs35112940	806	0.000729327	0.00178277	0.034537	0.083543	0.879408	3.52442e-13	5.12e-08	rs35112940	rs3865444	0.962951	0.913243	AD	CD33
leafcutter	AD	naive	19:51235253:51235518:clu_37835	rs12459419	802	0.000137702	0.000134483	0.00652109	0.00538086	0.987826	2.13342e-09	5.12e-08	rs3865444	rs3865444	0.993207	0.994582	AD	CD33
leafcutter	AD	IFNg	19:51225155:51225803:clu_37833	rs12459419	802	7.54454e-09	5.74084e-05	3.57285e-07	0.00172045	0.998222	1.69058e-19	5.12e-08	rs3865444	rs3865444	0.999942	0.998279	AD	CD33
leafcutter	AD	IFNg	19:51235663:51239518:clu_37834	rs35112940	806	0.000339832	0.00224845	0.0160926	0.105599	0.87572	1.84592e-14	5.12e-08	rs35112940	rs3865444	0.981319	0.892391	AD	CD33
leafcutter	AD	IFNg	19:51235253:51235518:clu_37835	rs12459419	802	0.00395313	0.000421621	0.187207	0.0191773	0.789241	1.22128e-05	5.12e-08	rs3865444	rs3865444	0.808418	0.976278	AD	CD33
leafcutter	AD	SL1344	19:51225155:51225803:clu_37833	rs12459419	802	1.59155e-08	6.22776e-05	7.53704e-07	0.00195127	0.997986	1.15967e-18	5.12e-08	rs3865444	rs3865444	0.999937	0.998049	AD	CD33
leafcutter	AD	SL1344	19:51235663:51239518:clu_37834	rs35112940	806	0.00576436	0.00135565	0.272969	0.0635397	0.656371	8.57512e-09	5.12e-08	rs35112940	rs3865444	0.719911	0.911739	AD	CD33
leafcutter	AD	SL1344	19:51235253:51235518:clu_37835	rs12459419	802	0.0178973	0.00139651	0.847556	0.066067	0.0670828	0.00412161	5.12e-08	rs11673312	rs3865444	0.13315	0.503814	AD	CD33
leafcutter	AD	IFNg_SL1344	19:51225155:51225803:clu_37833	rs12459419	802	6.99618e-08	5.51278e-05	3.31316e-06	0.00161234	0.998329	3.33506e-17	5.12e-08	rs3865444	rs3865444	0.999941	0.998388	AD	CD33
leafcutter	AD	IFNg_SL1344	19:51235663:51239518:clu_37834	rs35112940	806	0.00434195	0.000635815	0.205611	0.0293487	0.760062	3.10143e-07	5.12e-08	rs35112940	rs3865444	0.789411	0.962822	AD	CD33
leafcutter	AD	IFNg_SL1344	19:51235253:51235518:clu_37835	rs12459419	802	0.0169867	0.00143844	0.804435	0.0680107	0.10913	0.000970567	5.12e-08	rs148342283;rs34271951	rs3865444	0.17714	0.616063	AD	CD33
leafcutter	CEL	naive	22:37232918:37241587:clu_1936	rs9610686	226	0.00201555	0.000260945	0.0935172	0.0112143	0.892992	3.36724e-06	1.213e-07	rs9610686	rs9610686	0.904206	0.987598	CEL	RAC2
leafcutter	CEL	naive	22:37232918:37241587:clu_1936	rs13058338	226	0.00201555	0.000260945	0.0935172	0.0112143	0.892992	3.36724e-06	1.213e-07	rs9610686	rs9610686	0.904206	0.987598	CEL	RAC2
leafcutter	CEL	IFNg	22:37232918:37241587:clu_1936	rs9610686	226	0.00656594	0.00046687	0.304646	0.0209945	0.667327	2.14715e-05	1.213e-07	rs13058338	rs9610686	0.688322	0.969499	CEL	RAC2
leafcutter	CEL	IFNg	22:37232918:37241587:clu_1936	rs13058338	226	0.00656594	0.00046687	0.304646	0.0209945	0.667327	2.14715e-05	1.213e-07	rs13058338	rs9610686	0.688322	0.969499	CEL	RAC2
leafcutter	CEL	SL1344	22:37232918:37241587:clu_1936	rs9610686	226	0.0128078	0.000595281	0.594257	0.0272547	0.365086	0.000190311	1.213e-07	rs13058338	rs9610686	0.39234	0.930533	CEL	RAC2
leafcutter	CEL	SL1344	22:37232918:37241587:clu_1936	rs13058338	226	0.0128078	0.000595281	0.594257	0.0272547	0.365086	0.000190311	1.213e-07	rs13058338	rs9610686	0.39234	0.930533	CEL	RAC2
leafcutter	CEL	IFNg_SL1344	22:37232918:37241587:clu_1936	rs9610686	226	0.0108687	0.000503171	0.504286	0.0228846	0.461457	0.000125558	1.213e-07	rs12484612	rs9610686	0.484342	0.952751	CEL	RAC2
leafcutter	CEL	IFNg_SL1344	22:37232918:37241587:clu_1936	rs13058338	226	0.0108687	0.000503171	0.504286	0.0228846	0.461457	0.000125558	1.213e-07	rs12484612	rs9610686	0.484342	0.952751	CEL	RAC2
leafcutter	CEL	naive	1:7961735:7962763:clu_2656	rs200968609	363	0.00103755	0.00162392	0.0215624	0.0328053	0.942971	6.38033e-13	6.207e-07	rs17523802	rs9658012	0.975776	0.96638	CEL	PARK7
leafcutter	CEL	naive	1:7961735:7962763:clu_2656	rs34768550	306	0.00103791	0.00160929	0.0215657	0.0324947	0.943292	6.38033e-13	6.207e-07	rs17523802	rs9658012	0.975787	0.966699	CEL	PARK7
leafcutter	CEL	IFNg	1:7961735:7962763:clu_2656	rs200968609	363	0.00110872	0.00182042	0.0230414	0.036895	0.937134	1.368e-12	6.207e-07	rs17523802	rs9658012	0.974029	0.962121	CEL	PARK7
leafcutter	CEL	IFNg	1:7961735:7962763:clu_2656	rs34768550	306	0.00110906	0.00180766	0.023044	0.0366223	0.937417	1.368e-12	6.207e-07	rs17523802	rs9658012	0.974039	0.962402	CEL	PARK7
leafcutter	CEL	SL1344	1:7961735:7962763:clu_2656	rs200968609	363	0.00632148	0.00165008	0.131373	0.0334647	0.82719	1.78644e-09	6.207e-07	rs17523802	rs9658012	0.860655	0.961117	CEL	PARK7
leafcutter	CEL	SL1344	1:7961735:7962763:clu_2656	rs34768550	306	0.00632851	0.00160248	0.131494	0.0324684	0.828106	1.78644e-09	6.207e-07	rs17523802	rs9658012	0.860575	0.962271	CEL	PARK7
leafcutter	CEL	IFNg_SL1344	1:7961735:7962763:clu_2656	rs200968609	363	0.00628188	0.00208777	0.13055	0.0425695	0.818511	7.64456e-08	6.207e-07	rs34768550	rs9658012	0.86108	0.950563	CEL	PARK7
leafcutter	CEL	IFNg_SL1344	1:7961735:7962763:clu_2656	rs34768550	306	0.00628992	0.00203335	0.130693	0.0414296	0.819555	7.64456e-08	6.207e-07	rs34768550	rs9658012	0.860984	0.951881	CEL	PARK7
leafcutter	CD	naive	10:30434378:30434637:clu_24829	rs306588	1232	0.0163479	0.00240691	0.694135	0.102013	0.185098	0.000968408	2.527e-07	rs2489846	rs10826797	0.28711	0.644692	IBD	MAP3K8
leafcutter	CD	IFNg	10:30434378:30434637:clu_24829	rs306588	1232	0.0175125	0.00217827	0.743582	0.0923455	0.144382	0.0044832	2.527e-07	rs7086224	rs10826797	0.236727	0.609908	IBD	MAP3K8
leafcutter	CD	SL1344	10:30434378:30434637:clu_24829	rs306588	1232	1.17727e-06	0.000846579	4.9987e-05	0.0349818	0.96412	2.99872e-14	2.527e-07	rs303433	rs10826797	0.999102	0.964987	IBD	MAP3K8
leafcutter	CD	IFNg_SL1344	10:30434378:30434637:clu_24829	rs306588	1232	6.30969e-07	0.000788246	2.6791e-05	0.0325024	0.966682	6.95999e-15	2.527e-07	rs303433	rs10826797	0.999184	0.967471	IBD	MAP3K8
leafcutter	CD	naive	13:99313387:99314097:clu_26649	rs9557201	952	0.0527795	0.00500975	0.789484	0.0748588	0.0778682	0.00522076	1.867e-07	rs9517743	rs11428072	0.152727	0.509852	IBD	UBAC2
leafcutter	CD	IFNg	13:99313387:99314097:clu_26649	rs9557201	952	0.0537658	0.00493925	0.804238	0.0738189	0.0632381	0.0310717	1.867e-07	rs9517743	rs11428072	0.137057	0.4614	IBD	UBAC2
leafcutter	CD	SL1344	13:99313387:99314097:clu_26649	rs9557201	952	0.00967766	0.00328744	0.14476	0.0483801	0.793895	4.15392e-06	1.867e-07	rs9557201	rs11428072	0.842275	0.94256	IBD	UBAC2
leafcutter	CD	IFNg_SL1344	13:99313387:99314097:clu_26649	rs9557201	952	0.0411909	0.00477347	0.616139	0.0711356	0.266761	0.00316068	1.867e-07	rs66520914	rs11428072	0.337896	0.789475	IBD	UBAC2
leafcutter	CD	naive	11:61793028:61795341:clu_23154	rs174548	782	0.000544926	0.0011665	0.0285683	0.0602457	0.909475	5.24538e-08	6.768e-07	rs174548	rs174567	0.96972	0.937873	IBD	FADS2;FEN1;FADS1
leafcutter	CD	naive	11:61828597:61837778:clu_23154	rs7943728	707	0.000583215	0.00115819	0.0305695	0.0597992	0.90789	6.70286e-08	6.768e-07	rs174559	rs174567	0.967689	0.938204	IBD	FADS2;FEN1;FADS1
leafcutter	CD	IFNg	11:61793028:61795341:clu_23154	rs174548	782	0.00488351	0.00175741	0.256023	0.0914883	0.645848	3.88385e-06	6.768e-07	rs174603	rs174567	0.737336	0.87592	IBD	FADS2;FEN1;FADS1
leafcutter	CD	IFNg	11:61828597:61837778:clu_23154	rs7943728	707	0.00151214	0.00138203	0.0792597	0.0715933	0.846253	6.97832e-07	6.768e-07	rs7943728	rs174567	0.917846	0.921999	IBD	FADS2;FEN1;FADS1
leafcutter	CD	SL1344	11:61793028:61795341:clu_23154	rs174548	782	0.0122115	0.0013303	0.640202	0.0694655	0.276791	0.000511373	6.768e-07	rs7942717	rs174567	0.346256	0.799381	IBD	FADS2;FEN1;FADS1
leafcutter	CD	SL1344	11:61828597:61837778:clu_23154	rs7943728	707	0.00854298	0.00132828	0.447784	0.0691492	0.473195	6.16491e-05	6.768e-07	rs174544	rs174567	0.542344	0.872499	IBD	FADS2;FEN1;FADS1
leafcutter	CD	IFNg_SL1344	11:61793028:61795341:clu_23154	rs174548	782	0.00946336	0.0014548	0.496127	0.0758522	0.417103	0.00017943	6.768e-07	rs174475	rs174567	0.492955	0.846128	IBD	FADS2;FEN1;FADS1
leafcutter	CD	IFNg_SL1344	11:61828597:61837778:clu_23154	rs7943728	707	0.0106599	0.00132957	0.558742	0.0693298	0.359939	0.000166571	6.768e-07	rs174475	rs174567	0.429269	0.838493	IBD	FADS2;FEN1;FADS1
leafcutter	CD	naive	9:114790906:114792407:clu_19005	rs3810936	883	1.49985e-09	1.19883e-10	0.864861	0.0690623	0.0660766	0.0223103	2.462e-15	rs1885385	rs3810936	0.135139	0.488953	IBD	TNFSF15
leafcutter	CD	IFNg	9:114790906:114792407:clu_19005	rs3810936	883	1.42776e-09	1.51917e-10	0.823289	0.0875107	0.0892006	0.000448522	2.462e-15	rs10982414	rs3810936	0.176711	0.504782	IBD	TNFSF15
leafcutter	CD	SL1344	9:114790906:114792407:clu_19005	rs3810936	883	6.34894e-10	9.15245e-11	0.3661	0.0521941	0.581706	6.58063e-05	2.462e-15	rs4372078	rs3810936	0.6339	0.917662	IBD	TNFSF15
leafcutter	CD	IFNg_SL1344	9:114790906:114792407:clu_19005	rs3810936	883	3.10292e-10	3.38193e-11	0.178924	0.0186989	0.802377	1.30206e-05	2.462e-15	rs10114470	rs3810936	0.821076	0.977226	IBD	TNFSF15
leafcutter	CD	naive	9:136371970:136373532:clu_19533	rs4077515	799	1.54432e-18	2.50588e-16	0.000129911	0.0201001	0.97977	1.11876e-12	4.37e-20	rs4077515	rs4077515	0.99987	0.979897	IBD	CARD9
leafcutter	CD	naive	9:136364999:136365141:clu_19530	rs4266763	781	6.73954e-16	4.49715e-16	0.0566943	0.0369245	0.906381	4.1597e-07	4.37e-20	rs4266763	rs4077515	0.943306	0.960856	IBD	CARD9
leafcutter	CD	IFNg	9:136371970:136373532:clu_19533	rs4077515	799	1.93555e-15	7.29344e-16	0.162822	0.0605772	0.776601	1.57652e-05	4.37e-20	rs4498662	rs4077515	0.837178	0.927641	IBD	CARD9
leafcutter	CD	IFNg	9:136364999:136365141:clu_19530	rs4266763	781	9.62258e-15	9.25761e-16	0.809469	0.077764	0.112767	0.000146527	4.37e-20	rs12377038	rs4077515	0.190531	0.591856	IBD	CARD9
leafcutter	CD	SL1344	9:136371970:136373532:clu_19533	rs4077515	799	1.00028e-14	9.44239e-16	0.841456	0.0793519	0.0791918	0.0007816	4.37e-20	rs191898348	rs4077515	0.158544	0.499495	IBD	CARD9
leafcutter	CD	SL1344	9:136364999:136365141:clu_19530	rs4266763	781	1.01039e-14	8.2076e-16	0.849957	0.0689628	0.0810805	0.00534617	4.37e-20	rs181382167	rs4077515	0.150043	0.540381	IBD	CARD9
leafcutter	CD	IFNg_SL1344	9:136371970:136373532:clu_19533	rs4077515	799	9.96179e-15	8.71e-16	0.838005	0.0731813	0.0888137	0.00077614	4.37e-20	rs10641168	rs4077515	0.161995	0.54825	IBD	CARD9
leafcutter	CD	IFNg_SL1344	9:136364999:136365141:clu_19530	rs4266763	781	9.64241e-15	7.84702e-16	0.811138	0.0658877	0.122974	0.00361137	4.37e-20	rs13294808	rs4077515	0.188862	0.651133	IBD	CARD9
leafcutter	CD	naive	2:230245080:230247916:clu_10977	rs9989746	1471	0.00032721	5.59828e-05	0.689449	0.117766	0.192401	0.000646256	1.116e-08	rs17327304	rs7423615	0.310167	0.620313	IBD	SP140
leafcutter	CD	IFNg	2:230245080:230247916:clu_10977	rs9989746	1471	5.57225e-07	1.40796e-05	0.0011741	0.0286965	0.970115	2.74673e-12	1.116e-08	rs13384787	rs7423615	0.998811	0.971269	IBD	SP140
leafcutter	CD	SL1344	2:230245080:230247916:clu_10977	rs9989746	1471	0.000381835	5.78501e-05	0.804547	0.12182	0.0731935	0.00312035	1.116e-08	rs4972946	rs7423615	0.195014	0.375325	IBD	SP140
leafcutter	CD	IFNg_SL1344	2:230245080:230247916:clu_10977	rs9989746	1471	4.16047e-05	2.16186e-05	0.0876633	0.044684	0.86759	3.70415e-07	1.116e-08	rs13384787	rs7423615	0.912273	0.951019	IBD	SP140
leafcutter	CD	naive	1:155319688:155320409:clu_4996	rs6692183	306	5.337e-08	4.76482e-05	0.000105273	0.0930797	0.906767	1.62898e-15	6.098e-09	rs6692183	rs7543234	0.999847	0.906906	IBD	FDPS;RUSC1-AS1
leafcutter	CD	naive	1:155319688:155320409:clu_4996	rs11264361	335	5.33713e-08	4.76388e-05	0.000105272	0.0930586	0.906788	1.62898e-15	6.098e-09	rs6692183	rs7543234	0.999847	0.906927	IBD	FDPS;RUSC1-AS1
leafcutter	CD	naive	1:155319688:155320409:clu_4996	rs11264359	359	5.33712e-08	4.76387e-05	0.000105275	0.093061	0.906786	1.62898e-15	6.098e-09	rs6692183	rs7543234	0.999847	0.906925	IBD	FDPS;RUSC1-AS1
leafcutter	CD	naive	1:155319688:155320409:clu_4996	rs7417746	425	5.41086e-08	4.59959e-05	0.000104032	0.0875217	0.912328	1.62898e-15	6.098e-09	rs6692183	rs7543234	0.99985	0.912465	IBD	FDPS;RUSC1-AS1
leafcutter	CD	IFNg	1:155319688:155320409:clu_4996	rs6692183	306	7.49181e-09	4.53758e-05	1.47777e-05	0.0885928	0.911347	2.02414e-18	6.098e-09	rs2297480	rs7543234	0.99994	0.911402	IBD	FDPS;RUSC1-AS1
leafcutter	CD	IFNg	1:155319688:155320409:clu_4996	rs11264361	335	7.49221e-09	4.53547e-05	1.4778e-05	0.0885486	0.911391	2.02414e-18	6.098e-09	rs2297480	rs7543234	0.99994	0.911446	IBD	FDPS;RUSC1-AS1
leafcutter	CD	IFNg	1:155319688:155320409:clu_4996	rs11264359	359	7.49221e-09	4.53533e-05	1.47785e-05	0.0885484	0.911391	2.02414e-18	6.098e-09	rs2297480	rs7543234	0.99994	0.911446	IBD	FDPS;RUSC1-AS1
leafcutter	CD	IFNg	1:155319688:155320409:clu_4996	rs7417746	425	7.66518e-09	4.21631e-05	1.47374e-05	0.0801451	0.919798	2.02414e-18	6.098e-09	rs2297480	rs7543234	0.999943	0.91985	IBD	FDPS;RUSC1-AS1
leafcutter	CD	SL1344	1:155319688:155320409:clu_4996	rs6692183	306	4.39366e-07	4.89199e-05	0.000866654	0.0955914	0.903493	6.80941e-13	6.098e-09	rs11264359	rs7543234	0.999084	0.904321	IBD	FDPS;RUSC1-AS1
leafcutter	CD	SL1344	1:155319688:155320409:clu_4996	rs11264361	335	4.39501e-07	4.87955e-05	0.000866895	0.0953431	0.903741	6.80941e-13	6.098e-09	rs11264359	rs7543234	0.999084	0.904569	IBD	FDPS;RUSC1-AS1
leafcutter	CD	SL1344	1:155319688:155320409:clu_4996	rs11264359	359	4.395e-07	4.8795e-05	0.000866918	0.0953449	0.903739	6.80941e-13	6.098e-09	rs11264359	rs7543234	0.999084	0.904568	IBD	FDPS;RUSC1-AS1
leafcutter	CD	SL1344	1:155319688:155320409:clu_4996	rs7417746	425	4.44095e-07	4.75396e-05	0.000853839	0.0904933	0.908605	6.80941e-13	6.098e-09	rs11264359	rs7543234	0.999098	0.909425	IBD	FDPS;RUSC1-AS1
leafcutter	CD	IFNg_SL1344	1:155319688:155320409:clu_4996	rs6692183	306	2.37075e-06	6.21708e-05	0.00467633	0.121759	0.8735	2.65423e-11	6.098e-09	rs7417746	rs7543234	0.995259	0.877661	IBD	FDPS;RUSC1-AS1
leafcutter	CD	IFNg_SL1344	1:155319688:155320409:clu_4996	rs11264361	335	2.37165e-06	6.20227e-05	0.00467797	0.121463	0.873795	2.65423e-11	6.098e-09	rs7417746	rs7543234	0.995258	0.877958	IBD	FDPS;RUSC1-AS1
leafcutter	CD	IFNg_SL1344	1:155319688:155320409:clu_4996	rs11264359	359	2.37165e-06	6.20206e-05	0.00467811	0.121462	0.873795	2.65423e-11	6.098e-09	rs7417746	rs7543234	0.995257	0.877959	IBD	FDPS;RUSC1-AS1
leafcutter	CD	IFNg_SL1344	1:155319688:155320409:clu_4996	rs7417746	425	2.41191e-06	5.99576e-05	0.00463726	0.114396	0.880904	2.65423e-11	6.098e-09	rs7417746	rs7543234	0.9953	0.885063	IBD	FDPS;RUSC1-AS1
leafcutter	CD	naive	1:155689174:155709773:clu_5026	rs11264409	366	0.00130022	0.000277028	0.407477	0.0863136	0.504632	8.74895e-06	6.81e-08	rs11264409	rs821551	0.590946	0.85394	IBD	DAP3
leafcutter	CD	IFNg	1:155689174:155709773:clu_5026	rs11264409	366	0.000591337	0.000234804	0.18532	0.0728444	0.74101	2.88831e-06	6.81e-08	rs2666826	rs821551	0.813854	0.910494	IBD	DAP3
leafcutter	CD	SL1344	1:155689174:155709773:clu_5026	rs11264409	366	0.00202772	0.000202535	0.635471	0.0631736	0.299125	0.000108124	6.81e-08	rs11289393	rs821551	0.362299	0.825631	IBD	DAP3
leafcutter	CD	IFNg_SL1344	1:155689174:155709773:clu_5026	rs11264409	366	0.00244415	0.000145476	0.765977	0.0454048	0.186029	0.000185996	6.81e-08	rs145976521	rs821551	0.231433	0.803811	IBD	DAP3
leafcutter	IBD	naive	1:161591717:161592129:clu_5267	rs6687275	934	2.93123e-10	9.07998e-11	0.435756	0.134553	0.429691	2.88471e-07	1.174e-15	rs72717040	rs10800314	0.564244	0.761533	IBD	NA
leafcutter	IBD	IFNg	1:161591717:161592129:clu_5267	rs6687275	934	4.02178e-10	6.38598e-11	0.597878	0.0946264	0.307496	2.46404e-05	1.174e-15	rs17400517	rs10800314	0.402122	0.764682	IBD	NA
leafcutter	IBD	SL1344	1:161591717:161592129:clu_5267	rs6687275	934	3.885e-10	5.77151e-11	0.577544	0.0854623	0.336994	4.21429e-06	1.174e-15	rs6687275	rs10800314	0.422456	0.797702	IBD	NA
leafcutter	IBD	IFNg_SL1344	1:161591717:161592129:clu_5267	rs6687275	934	1.12533e-10	2.32848e-11	0.167291	0.0338163	0.798892	5.14094e-06	1.174e-15	rs77801348	rs10800314	0.832709	0.95939	IBD	NA
leafcutter	IBD	naive	10:30434378:30434637:clu_24829	rs306588	1232	0.00422481	0.00062202	0.641791	0.094232	0.25913	0.000968408	3.471e-08	rs2489846	rs10826797	0.353362	0.733327	IBD	MAP3K8
leafcutter	IBD	IFNg	10:30434378:30434637:clu_24829	rs306588	1232	0.00509008	0.000633126	0.773234	0.0960532	0.124989	0.0044832	3.471e-08	rs7086224	rs10826797	0.221043	0.565454	IBD	MAP3K8
leafcutter	IBD	SL1344	10:30434378:30434637:clu_24829	rs306588	1232	5.093e-07	0.00036624	7.73678e-05	0.0546906	0.944865	2.99872e-14	3.471e-08	rs303433	rs10826797	0.999556	0.945285	IBD	MAP3K8
leafcutter	IBD	IFNg_SL1344	10:30434378:30434637:clu_24829	rs306588	1232	2.80843e-07	0.000350846	4.26628e-05	0.0523498	0.947256	6.95999e-15	3.471e-08	rs303433	rs10826797	0.999606	0.94763	IBD	MAP3K8
leafcutter	IBD	naive	10:102466087:102468287:clu_25710	rs12570201	677	5.87562e-07	0.00312073	1.59838e-05	0.0839819	0.912881	6.85189e-15	9.37e-07	rs12570201	rs12572775	0.996863	0.915754	IBD	MFSD13A
leafcutter	IBD	IFNg	10:102466087:102468287:clu_25710	rs12570201	677	5.80893e-06	0.00329002	0.000158023	0.0885922	0.907954	1.26836e-12	9.37e-07	rs12570201	rs12572775	0.996546	0.911101	IBD	MFSD13A
leafcutter	IBD	SL1344	10:102466087:102468287:clu_25710	rs12570201	677	0.0225111	0.00256037	0.612381	0.0693579	0.293189	0.00168054	9.37e-07	rs12570201	rs12572775	0.362547	0.808693	IBD	MFSD13A
leafcutter	IBD	IFNg_SL1344	10:102466087:102468287:clu_25710	rs12570201	677	0.00869771	0.00303719	0.236609	0.0819525	0.669704	2.11112e-05	9.37e-07	rs5870	rs12572775	0.751657	0.890971	IBD	MFSD13A
leafcutter	IBD	naive	10:80512269:80512719:clu_25336	rs10748526	1031	0.0214361	0.0125287	0.133889	0.0774996	0.754647	3.06434e-06	9.693e-07	rs10749609	rs2343551	0.832146	0.906868	IBD	TSPAN14
leafcutter	IBD	IFNg	10:80512269:80512719:clu_25336	rs10748526	1031	0.0501234	0.0179519	0.31307	0.11162	0.507235	1.34358e-05	9.693e-07	rs7086627	rs2343551	0.618855	0.819635	IBD	TSPAN14
leafcutter	IBD	SL1344	10:80512269:80512719:clu_25336	rs10748526	1031	0.0838531	0.0114878	0.523744	0.0714428	0.309472	0.000836114	9.693e-07	rs6586030	rs2343551	0.380915	0.812444	IBD	TSPAN14
leafcutter	IBD	IFNg_SL1344	10:80512269:80512719:clu_25336	rs10748526	1031	0.0435992	0.0109873	0.272319	0.0680212	0.605073	2.84214e-05	9.693e-07	rs7096909	rs2343551	0.673094	0.898943	IBD	TSPAN14
leafcutter	IBD	naive	9:136371970:136373532:clu_19533	rs4077515	799	6.51056e-24	1.05643e-21	0.000131589	0.0203727	0.979496	1.11876e-12	1.5e-25	rs4077515	rs4077515	0.999868	0.979625	IBD	CARD9
leafcutter	IBD	naive	9:136364999:136365141:clu_19530	rs4266763	781	2.98082e-21	1.98904e-21	0.0602474	0.0393013	0.900451	4.1597e-07	1.5e-25	rs4266763	rs4077515	0.939753	0.958179	IBD	CARD9
leafcutter	IBD	IFNg	9:136371970:136373532:clu_19533	rs4077515	799	8.07243e-21	3.04182e-21	0.163157	0.0607041	0.776139	1.57652e-05	1.5e-25	rs4498662	rs4077515	0.836843	0.927461	IBD	CARD9
leafcutter	IBD	IFNg	9:136364999:136365141:clu_19530	rs4266763	781	4.00523e-20	3.85332e-21	0.809523	0.0777692	0.112708	0.000146527	1.5e-25	rs12377038	rs4077515	0.190477	0.591714	IBD	CARD9
leafcutter	IBD	SL1344	9:136371970:136373532:clu_19533	rs4077515	799	4.15786e-20	3.92491e-21	0.840373	0.0792485	0.0803787	0.0007816	1.5e-25	rs191898348	rs4077515	0.159627	0.50354	IBD	CARD9
leafcutter	IBD	SL1344	9:136364999:136365141:clu_19530	rs4266763	781	4.20267e-20	3.41392e-21	0.84943	0.0689194	0.0816508	0.00534617	1.5e-25	rs181382167	rs4077515	0.15057	0.542277	IBD	CARD9
leafcutter	IBD	IFNg_SL1344	9:136371970:136373532:clu_19533	rs4077515	799	4.14865e-20	3.62733e-21	0.838511	0.0732262	0.0882624	0.00077614	1.5e-25	rs10641168	rs4077515	0.161489	0.546555	IBD	CARD9
leafcutter	IBD	IFNg_SL1344	9:136364999:136365141:clu_19530	rs4266763	781	4.0161e-20	3.26831e-21	0.81172	0.0659357	0.122344	0.00361137	1.5e-25	rs13294808	rs4077515	0.18828	0.6498	IBD	CARD9
leafcutter	IBD	naive	2:218282181:218284039:clu_10800	rs1052578	542	0.000334874	0.000158694	0.347556	0.164216	0.487735	2.71705e-06	7.808e-09	rs1052578	rs4674277	0.651951	0.748116	IBD	TMBIM1
leafcutter	IBD	naive	2:218282181:218284039:clu_10800	rs3731860	553	0.000316761	0.000152603	0.359203	0.172582	0.467745	2.71705e-06	7.808e-09	rs1052578	rs4674277	0.640327	0.730479	IBD	TMBIM1
leafcutter	IBD	naive	2:218282181:218284039:clu_10800	rs1017698	554	0.000320554	0.000154154	0.356604	0.171019	0.471902	2.71705e-06	7.808e-09	rs1052578	rs4674277	0.642921	0.733997	IBD	TMBIM1
leafcutter	IBD	IFNg	2:218282181:218284039:clu_10800	rs1052578	542	5.81144e-07	6.91221e-05	0.000603151	0.0708113	0.928516	3.37057e-11	7.808e-09	rs3731860	rs4674277	0.999327	0.929141	IBD	TMBIM1
leafcutter	IBD	IFNg	2:218282181:218284039:clu_10800	rs3731860	553	5.75803e-07	6.91702e-05	0.000652953	0.0775164	0.921761	3.37057e-11	7.808e-09	rs3731860	rs4674277	0.999277	0.922428	IBD	TMBIM1
leafcutter	IBD	IFNg	2:218282181:218284039:clu_10800	rs1017698	554	5.77015e-07	6.91461e-05	0.000641906	0.0759991	0.923289	3.37057e-11	7.808e-09	rs3731860	rs4674277	0.999288	0.923947	IBD	TMBIM1
leafcutter	IBD	SL1344	2:218282181:218284039:clu_10800	rs1052578	542	0.000152043	9.71242e-05	0.1578	0.10006	0.74189	3.4829e-06	7.808e-09	rs1017698	rs4674277	0.84195	0.881156	IBD	TMBIM1
leafcutter	IBD	SL1344	2:218282181:218284039:clu_10800	rs3731860	553	0.000147557	9.59351e-05	0.167328	0.108065	0.724364	3.4829e-06	7.808e-09	rs1017698	rs4674277	0.832428	0.870181	IBD	TMBIM1
leafcutter	IBD	SL1344	2:218282181:218284039:clu_10800	rs1017698	554	0.00014853	9.62769e-05	0.165234	0.106376	0.728145	3.4829e-06	7.808e-09	rs1017698	rs4674277	0.834521	0.87253	IBD	TMBIM1
leafcutter	IBD	IFNg_SL1344	2:218282181:218284039:clu_10800	rs1052578	542	3.49323e-05	0.000108142	0.0362552	0.111385	0.852217	3.30998e-07	7.808e-09	rs3731860	rs4674277	0.963602	0.884408	IBD	TMBIM1
leafcutter	IBD	IFNg_SL1344	2:218282181:218284039:clu_10800	rs3731860	553	3.43135e-05	0.000107693	0.0389111	0.121282	0.839664	3.30998e-07	7.808e-09	rs3731860	rs4674277	0.960947	0.873789	IBD	TMBIM1
leafcutter	IBD	IFNg_SL1344	2:218282181:218284039:clu_10800	rs1017698	554	3.44483e-05	0.000107859	0.0383225	0.119147	0.842388	3.30998e-07	7.808e-09	rs3731860	rs4674277	0.961535	0.876087	IBD	TMBIM1
leafcutter	IBD	naive	1:155192310:155192786:clu_4966	rs2974935	453	0.00170729	0.00193683	0.0863689	0.097168	0.812819	5.38797e-08	6.915e-07	rs2974935	rs734073	0.909987	0.89322	IBD	MUC1
leafcutter	IBD	naive	1:155192283:155192786:clu_4966	rs4072037	463	0.00189761	0.0017365	0.0957308	0.0867893	0.813846	5.74065e-08	6.915e-07	rs2974935	rs734073	0.900635	0.903635	IBD	MUC1
leafcutter	IBD	naive	1:155192310:155192786:clu_4966	rs4072037	463	0.00170809	0.00193919	0.0861697	0.0970151	0.813168	5.38797e-08	6.915e-07	rs2974935	rs734073	0.910183	0.893411	IBD	MUC1
leafcutter	IBD	IFNg	1:155192310:155192786:clu_4966	rs2974935	453	2.367e-13	0.00106148	1.19742e-11	0.0527524	0.946186	6.1776e-30	6.915e-07	rs4072037	rs734073	0.998939	0.947192	IBD	MUC1
leafcutter	IBD	IFNg	1:155192283:155192786:clu_4966	rs4072037	463	2.09599e-13	0.00106192	1.05738e-11	0.0526253	0.946313	4.79229e-30	6.915e-07	rs4072037	rs734073	0.998938	0.947319	IBD	MUC1
leafcutter	IBD	IFNg	1:155192310:155192786:clu_4966	rs4072037	463	2.36735e-13	0.00106164	1.19428e-11	0.0526114	0.946327	6.1776e-30	6.915e-07	rs4072037	rs734073	0.998938	0.947333	IBD	MUC1
leafcutter	IBD	SL1344	1:155192310:155192786:clu_4966	rs2974935	453	2.13347e-08	0.00110346	1.07928e-06	0.0548778	0.944018	1.8275e-19	6.915e-07	rs4072037	rs734073	0.998895	0.945061	IBD	MUC1
leafcutter	IBD	SL1344	1:155192283:155192786:clu_4966	rs4072037	463	1.10677e-07	0.00112921	5.58345e-06	0.0560233	0.942842	6.6589e-18	6.915e-07	rs4072037	rs734073	0.998865	0.943913	IBD	MUC1
leafcutter	IBD	SL1344	1:155192310:155192786:clu_4966	rs4072037	463	2.1338e-08	0.00110363	1.07646e-06	0.0547317	0.944164	1.8275e-19	6.915e-07	rs4072037	rs734073	0.998895	0.945208	IBD	MUC1
leafcutter	IBD	IFNg_SL1344	1:155192310:155192786:clu_4966	rs2974935	453	9.07599e-14	0.0010711	4.59137e-12	0.0532394	0.94569	8.64694e-31	6.915e-07	rs4072037	rs734073	0.998929	0.946704	IBD	MUC1
leafcutter	IBD	IFNg_SL1344	1:155192283:155192786:clu_4966	rs4072037	463	6.71364e-13	0.00106151	3.3869e-11	0.0526046	0.946334	5.48293e-29	6.915e-07	rs4072037	rs734073	0.998938	0.947339	IBD	MUC1
leafcutter	IBD	IFNg_SL1344	1:155192310:155192786:clu_4966	rs4072037	463	9.07735e-14	0.00107126	4.57934e-12	0.0530973	0.945831	8.64694e-31	6.915e-07	rs4072037	rs734073	0.998929	0.946846	IBD	MUC1
leafcutter	UC	naive	10:102466087:102468287:clu_25710	rs12570201	677	7.7812e-07	0.00413284	1.41385e-05	0.0741726	0.92168	6.85189e-15	9.996e-07	rs12570201	rs11591780	0.995852	0.925518	IBD	MFSD13A
leafcutter	UC	IFNg	10:102466087:102468287:clu_25710	rs12570201	677	7.8787e-06	0.00446229	0.000143157	0.0801651	0.915222	1.26836e-12	9.996e-07	rs12570201	rs11591780	0.995387	0.919463	IBD	MFSD13A
leafcutter	UC	SL1344	10:102466087:102468287:clu_25710	rs12570201	677	0.0321618	0.00365802	0.584385	0.0661531	0.313642	0.00168054	9.996e-07	rs12570201	rs11591780	0.379795	0.825819	IBD	MFSD13A
leafcutter	UC	IFNg_SL1344	10:102466087:102468287:clu_25710	rs12570201	677	0.0114414	0.00399527	0.207892	0.0718897	0.704782	2.11112e-05	9.996e-07	rs5870	rs11591780	0.776671	0.907439	IBD	MFSD13A
leafcutter	UC	naive	9:136371970:136373532:clu_19533	rs4077515	799	5.93898e-12	9.63682e-10	0.000144461	0.0224635	0.977392	1.11876e-12	2.894e-13	rs4077515	rs3829111	0.999856	0.977533	IBD	CARD9
leafcutter	UC	naive	9:136364999:136365141:clu_19530	rs4266763	781	2.54446e-09	1.69787e-09	0.0618921	0.0404016	0.897706	4.1597e-07	2.894e-13	rs4266763	rs3829111	0.938108	0.956933	IBD	CARD9
leafcutter	UC	IFNg	9:136371970:136373532:clu_19533	rs4077515	799	6.77933e-09	2.55456e-09	0.164902	0.061364	0.773734	1.57652e-05	2.894e-13	rs4498662	rs3829111	0.835098	0.926519	IBD	CARD9
leafcutter	UC	IFNg	9:136364999:136365141:clu_19530	rs4266763	781	3.33844e-08	3.21182e-09	0.81205	0.0780151	0.109935	0.000146527	2.894e-13	rs12377038	rs3829111	0.18795	0.584915	IBD	CARD9
leafcutter	UC	SL1344	9:136371970:136373532:clu_19533	rs4077515	799	3.45299e-08	3.25953e-09	0.839914	0.0792047	0.0808813	0.0007816	2.894e-13	rs191898348	rs3829111	0.160086	0.505237	IBD	CARD9
leafcutter	UC	SL1344	9:136364999:136365141:clu_19530	rs4266763	781	3.48608e-08	2.83182e-09	0.847963	0.0687987	0.0832378	0.00534617	2.894e-13	rs181382167	rs3829111	0.152037	0.547486	IBD	CARD9
leafcutter	UC	IFNg_SL1344	9:136371970:136373532:clu_19533	rs4077515	799	3.44829e-08	3.01498e-09	0.838772	0.0732492	0.0879788	0.00077614	2.894e-13	rs10641168	rs3829111	0.161228	0.545679	IBD	CARD9
leafcutter	UC	IFNg_SL1344	9:136364999:136365141:clu_19530	rs4266763	781	3.34077e-08	2.71873e-09	0.812617	0.0660097	0.121373	0.00361137	2.894e-13	rs13294808	rs3829111	0.187383	0.647728	IBD	CARD9
leafcutter	UC	naive	2:218282181:218284039:clu_10800	rs1052578	542	0.000396633	0.000187961	0.343707	0.162387	0.493322	2.71705e-06	5.284e-09	rs1052578	rs4674277	0.655708	0.752349	IBD	TMBIM1
leafcutter	UC	naive	2:218282181:218284039:clu_10800	rs3731860	553	0.000384855	0.000185408	0.349515	0.1679	0.482014	2.71705e-06	5.284e-09	rs1052578	rs4674277	0.649915	0.741658	IBD	TMBIM1
leafcutter	UC	naive	2:218282181:218284039:clu_10800	rs1017698	554	0.000387355	0.000186278	0.348119	0.166925	0.484382	2.71705e-06	5.284e-09	rs1052578	rs4674277	0.651308	0.743707	IBD	TMBIM1
leafcutter	UC	IFNg	2:218282181:218284039:clu_10800	rs1052578	542	5.68256e-07	6.75892e-05	0.000492429	0.0576285	0.941811	3.37057e-11	5.284e-09	rs3731860	rs4674277	0.999439	0.942339	IBD	TMBIM1
leafcutter	UC	IFNg	2:218282181:218284039:clu_10800	rs3731860	553	5.65896e-07	6.79801e-05	0.000513931	0.060799	0.938618	3.37057e-11	5.284e-09	rs3731860	rs4674277	0.999418	0.939166	IBD	TMBIM1
leafcutter	UC	IFNg	2:218282181:218284039:clu_10800	rs1017698	554	5.66446e-07	6.78796e-05	0.000509069	0.0600645	0.939358	3.37057e-11	5.284e-09	rs3731860	rs4674277	0.999422	0.939901	IBD	TMBIM1
leafcutter	UC	SL1344	2:218282181:218284039:clu_10800	rs1052578	542	0.000164502	0.000105083	0.142552	0.0902945	0.766884	3.4829e-06	5.284e-09	rs1017698	rs4674277	0.857179	0.894661	IBD	TMBIM1
leafcutter	UC	SL1344	2:218282181:218284039:clu_10800	rs3731860	553	0.000162076	0.000105374	0.147193	0.0949406	0.757599	3.4829e-06	5.284e-09	rs1017698	rs4674277	0.85254	0.888638	IBD	TMBIM1
leafcutter	UC	SL1344	2:218282181:218284039:clu_10800	rs1017698	554	0.000162611	0.000105404	0.146139	0.0939675	0.759625	3.4829e-06	5.284e-09	rs1017698	rs4674277	0.853593	0.889915	IBD	TMBIM1
leafcutter	UC	IFNg_SL1344	2:218282181:218284039:clu_10800	rs1052578	542	3.75779e-05	0.000116332	0.0325636	0.0999416	0.867341	3.30998e-07	5.284e-09	rs3731860	rs4674277	0.967282	0.896678	IBD	TMBIM1
leafcutter	UC	IFNg_SL1344	2:218282181:218284039:clu_10800	rs3731860	553	3.72411e-05	0.000116881	0.0338214	0.105287	0.860737	3.30998e-07	5.284e-09	rs3731860	rs4674277	0.966024	0.89101	IBD	TMBIM1
leafcutter	UC	IFNg_SL1344	2:218282181:218284039:clu_10800	rs1017698	554	3.73149e-05	0.000116835	0.0335352	0.104138	0.862172	3.30998e-07	5.284e-09	rs3731860	rs4674277	0.966311	0.892231	IBD	TMBIM1
leafcutter	UC	naive	7:128938245:128942071:clu_15798	rs4731532	868	9.1185e-07	0.00214503	1.75123e-05	0.0402382	0.957598	1.24424e-16	2.847e-07	rs4731532	rs4728142	0.997837	0.959675	IBD	IRF5
leafcutter	UC	naive	7:128938245:128942071:clu_15798	rs3807307	867	9.1185e-07	0.00214503	1.7512e-05	0.0402377	0.957599	1.24424e-16	2.847e-07	rs4731532	rs4728142	0.997837	0.959675	IBD	IRF5
leafcutter	UC	IFNg	7:128938245:128942071:clu_15798	rs4731532	868	4.8541e-07	0.00149456	9.3224e-06	0.0277325	0.970763	9.09524e-18	2.847e-07	rs4731532	rs4728142	0.998496	0.972226	IBD	IRF5
leafcutter	UC	IFNg	7:128938245:128942071:clu_15798	rs3807307	867	4.8541e-07	0.00149456	9.32227e-06	0.0277322	0.970763	9.09524e-18	2.847e-07	rs4731532	rs4728142	0.998496	0.972226	IBD	IRF5
leafcutter	UC	SL1344	7:128938245:128942071:clu_15798	rs4731532	868	9.10237e-05	0.00344188	0.00174813	0.0651726	0.929546	2.56236e-12	2.847e-07	rs3807307	rs4728142	0.994719	0.934481	IBD	IRF5
leafcutter	UC	SL1344	7:128938245:128942071:clu_15798	rs3807307	867	9.10238e-05	0.00344188	0.00174811	0.0651716	0.929547	2.56236e-12	2.847e-07	rs3807307	rs4728142	0.994719	0.934482	IBD	IRF5
leafcutter	UC	IFNg_SL1344	7:128938245:128942071:clu_15798	rs4731532	868	8.35653e-05	0.00324408	0.00160489	0.0613696	0.933698	2.46785e-12	2.847e-07	rs3807307	rs4728142	0.995067	0.938326	IBD	IRF5
leafcutter	UC	IFNg_SL1344	7:128938245:128942071:clu_15798	rs3807307	867	8.35653e-05	0.0032441	0.00160487	0.061369	0.933698	2.46785e-12	2.847e-07	rs3807307	rs4728142	0.995067	0.938327	IBD	IRF5
leafcutter	RA	naive	1:37868614:37869485:clu_3508	rs28593140	638	0.000132122	0.000117654	0.0575442	0.0503511	0.891855	3.65292e-07	5.2e-09	rs28593140	rs28411352	0.942206	0.94656	RA	INPP5B
leafcutter	RA	naive	1:37868614:37872930:clu_3508	rs2306425	641	0.000389212	0.000138228	0.169518	0.0594335	0.770521	4.7285e-06	5.2e-09	rs28593140	rs28411352	0.829955	0.928389	RA	INPP5B
leafcutter	RA	IFNg	1:37868614:37869485:clu_3508	rs28593140	638	1.395e-05	9.59333e-05	0.00607576	0.0408296	0.952985	1.48587e-09	5.2e-09	rs28593140	rs28411352	0.993814	0.958916	RA	INPP5B
leafcutter	RA	IFNg	1:37868614:37872930:clu_3508	rs2306425	641	1.97518e-05	0.00011841	0.00860272	0.0506315	0.940628	2.3513e-09	5.2e-09	rs28593140	rs28411352	0.991259	0.948922	RA	INPP5B
leafcutter	RA	SL1344	1:37868614:37869485:clu_3508	rs28593140	638	0.00171112	0.00014386	0.745256	0.0624661	0.190423	0.00178192	5.2e-09	rs72661807	rs28411352	0.252889	0.75299	RA	INPP5B
leafcutter	RA	SL1344	1:37868614:37872930:clu_3508	rs2306425	641	0.000181797	0.000132228	0.0791799	0.0567268	0.863779	6.60301e-07	5.2e-09	rs2306627	rs28411352	0.920506	0.938374	RA	INPP5B
leafcutter	RA	IFNg_SL1344	1:37868614:37869485:clu_3508	rs28593140	638	0.000341763	8.48197e-05	0.148851	0.0361276	0.814595	8.05104e-06	5.2e-09	rs28411352	rs28411352	0.850723	0.957533	RA	INPP5B
leafcutter	RA	IFNg_SL1344	1:37868614:37872930:clu_3508	rs2306425	641	0.00141838	0.000124686	0.617763	0.0539791	0.326715	0.000203133	5.2e-09	rs12137845	rs28411352	0.380694	0.858209	RA	INPP5B
leafcutter	RA	naive	7:128938245:128942071:clu_15798	rs4731532	658	1.21264e-11	2.78109e-08	2.84574e-05	0.0643289	0.935643	1.24424e-16	4.2e-12	rs4731532	rs3778753	0.999972	0.935669	RA	IRF5
leafcutter	RA	naive	7:128938245:128942071:clu_15798	rs3807307	659	1.21264e-11	2.78109e-08	2.84574e-05	0.0643289	0.935643	1.24424e-16	4.2e-12	rs4731532	rs3778753	0.999972	0.935669	RA	IRF5
leafcutter	RA	IFNg	7:128938245:128942071:clu_15798	rs4731532	658	3.53976e-11	1.07566e-07	8.30684e-05	0.25168	0.748237	9.09524e-18	4.2e-12	rs4731532	rs3778753	0.999917	0.748299	RA	IRF5
leafcutter	RA	IFNg	7:128938245:128942071:clu_15798	rs3807307	659	3.53976e-11	1.07566e-07	8.30684e-05	0.25168	0.748237	9.09524e-18	4.2e-12	rs4731532	rs3778753	0.999917	0.748299	RA	IRF5
leafcutter	RA	SL1344	7:128938245:128942071:clu_15798	rs4731532	658	4.91152e-10	1.83019e-08	0.0011526	0.0419927	0.956855	2.56236e-12	4.2e-12	rs3807307	rs3778753	0.998847	0.957959	RA	IRF5
leafcutter	RA	SL1344	7:128938245:128942071:clu_15798	rs3807307	659	4.91152e-10	1.8302e-08	0.0011526	0.0419929	0.956854	2.56236e-12	4.2e-12	rs3807307	rs3778753	0.998847	0.957959	RA	IRF5
leafcutter	RA	IFNg_SL1344	7:128938245:128942071:clu_15798	rs4731532	658	4.84823e-10	1.8305e-08	0.00113775	0.0419999	0.956862	2.46785e-12	4.2e-12	rs3807307	rs3778753	0.998862	0.957952	RA	IRF5
leafcutter	RA	IFNg_SL1344	7:128938245:128942071:clu_15798	rs3807307	659	4.84823e-10	1.83051e-08	0.00113775	0.0420002	0.956862	2.46785e-12	4.2e-12	rs3807307	rs3778753	0.998862	0.957952	RA	IRF5
leafcutter	RA	naive	20:46122756:46126640:clu_669	rs4239702	545	1.43049e-08	8.62227e-10	0.773734	0.0464571	0.179809	0.00268626	4.2e-14	rs2064405	rs4239702	0.226266	0.794679	RA	CD40
leafcutter	RA	IFNg	20:46122756:46126640:clu_669	rs4239702	545	1.14116e-09	2.59794e-10	0.0617239	0.0131268	0.925149	3.70581e-07	4.2e-14	rs4239702	rs4239702	0.938276	0.98601	RA	CD40
leafcutter	RA	SL1344	20:46122756:46126640:clu_669	rs4239702	545	3.65372e-09	4.93458e-10	0.197626	0.0259141	0.77646	1.6507e-05	4.2e-14	rs6032660	rs4239702	0.802374	0.967703	RA	CD40
leafcutter	RA	IFNg_SL1344	20:46122756:46126640:clu_669	rs4239702	545	7.92069e-09	7.06368e-10	0.428422	0.0376728	0.533906	0.000190371	4.2e-14	rs4239702	rs4239702	0.571578	0.93409	RA	CD40
leafcutter	RA	naive	1:161510074:161510834:clu_5265	rs11810143	676	1.44845e-07	0.000342099	2.26653e-05	0.0525842	0.947051	3.57479e-20	9.8e-08	rs12722986	rs4657041	0.999635	0.947397	RA	FCGR2A;RP11-25K21.6
leafcutter	RA	naive	1:161510074:161510834:clu_5265	rs10494359	663	1.44845e-07	0.000342099	2.26653e-05	0.0525845	0.947051	3.57479e-20	9.8e-08	rs12722986	rs4657041	0.999635	0.947396	RA	FCGR2A;RP11-25K21.6
leafcutter	RA	naive	1:161510074:161513895:clu_5265	rs10494359	663	3.95351e-07	0.000341533	6.18643e-05	0.0524959	0.9471	7.55535e-19	9.8e-08	rs12722986	rs4657041	0.999596	0.947483	RA	FCGR2A;RP11-25K21.6
leafcutter	RA	IFNg	1:161510074:161510834:clu_5265	rs11810143	676	1.7107e-08	0.000337412	2.67689e-06	0.0518501	0.94781	3.17725e-23	9.8e-08	rs10494359	rs4657041	0.99966	0.948132	RA	FCGR2A;RP11-25K21.6
leafcutter	RA	IFNg	1:161510074:161510834:clu_5265	rs10494359	663	1.7107e-08	0.000337412	2.6769e-06	0.0518502	0.94781	3.17725e-23	9.8e-08	rs10494359	rs4657041	0.99966	0.948132	RA	FCGR2A;RP11-25K21.6
leafcutter	RA	IFNg	1:161510074:161513895:clu_5265	rs10494359	663	4.06717e-08	0.000336928	6.36428e-06	0.0517744	0.947882	7.39689e-22	9.8e-08	rs12722986	rs4657041	0.999657	0.948208	RA	FCGR2A;RP11-25K21.6
leafcutter	RA	SL1344	1:161510074:161510834:clu_5265	rs11810143	676	9.21745e-07	0.000353205	0.000144234	0.054324	0.945178	1.03443e-17	9.8e-08	rs12722986	rs4657041	0.999502	0.945649	RA	FCGR2A;RP11-25K21.6
leafcutter	RA	SL1344	1:161510074:161510834:clu_5265	rs10494359	663	9.21745e-07	0.000353202	0.000144234	0.0543237	0.945178	1.03443e-17	9.8e-08	rs12722986	rs4657041	0.999502	0.945649	RA	FCGR2A;RP11-25K21.6
leafcutter	RA	SL1344	1:161510074:161513895:clu_5265	rs10494359	663	1.03306e-06	0.000349196	0.000161652	0.0536962	0.945792	1.46992e-17	9.8e-08	rs12722986	rs4657041	0.999488	0.946276	RA	FCGR2A;RP11-25K21.6
leafcutter	RA	IFNg_SL1344	1:161510074:161510834:clu_5265	rs11810143	676	1.86155e-06	0.000339988	0.000291294	0.0522539	0.947113	8.22404e-17	9.8e-08	rs12722986	rs4657041	0.999367	0.947713	RA	FCGR2A;RP11-25K21.6
leafcutter	RA	IFNg_SL1344	1:161510074:161510834:clu_5265	rs10494359	663	1.86155e-06	0.000339985	0.000291294	0.0522536	0.947113	8.22404e-17	9.8e-08	rs12722986	rs4657041	0.999367	0.947713	RA	FCGR2A;RP11-25K21.6
leafcutter	RA	IFNg_SL1344	1:161510074:161513895:clu_5265	rs10494359	663	2.27395e-07	0.000337445	3.55826e-05	0.0518555	0.947771	1.00315e-19	9.8e-08	rs10494359	rs4657041	0.999627	0.948125	RA	FCGR2A;RP11-25K21.6
leafcutter	RA	naive	6:26463525:26465218:clu_16492	rs41267923	996	0.000123133	0.00420852	0.0161478	0.551483	0.428037	4.4082e-15	2.5e-08	rs12200782	rs6913550	0.979521	0.436987	RA	BTN2A1
leafcutter	RA	naive	6:26463525:26465218:clu_16492	rs12195971	1001	0.000119102	0.00407086	0.0165343	0.564719	0.414556	4.4082e-15	2.5e-08	rs12200782	rs6913550	0.979276	0.42333	RA	BTN2A1
leafcutter	RA	naive	6:26463525:26465218:clu_16492	rs72840194	958	0.000156642	0.00467085	0.0162218	0.483217	0.495733	4.4082e-15	2.5e-08	rs12200782	rs6913550	0.978951	0.506393	RA	BTN2A1
leafcutter	RA	IFNg	6:26463525:26465218:clu_16492	rs41267923	996	2.59469e-05	0.000691491	0.00340272	0.0897771	0.906103	7.16183e-15	2.5e-08	rs12195971	rs6913550	0.99588	0.909852	RA	BTN2A1
leafcutter	RA	IFNg	6:26463525:26465218:clu_16492	rs12195971	1001	2.57546e-05	0.000687296	0.00357536	0.0945122	0.901199	7.16183e-15	2.5e-08	rs12195971	rs6913550	0.995712	0.905081	RA	BTN2A1
leafcutter	RA	IFNg	6:26463525:26465218:clu_16492	rs72840194	958	2.85408e-05	0.000548161	0.00295568	0.0558269	0.940641	7.16183e-15	2.5e-08	rs12195971	rs6913550	0.996468	0.943975	RA	BTN2A1
leafcutter	RA	SL1344	6:26463525:26465218:clu_16492	rs41267923	996	0.000127902	0.00530955	0.0167732	0.696021	0.281769	2.5597e-15	2.5e-08	rs148333907	rs6913550	0.977789	0.288169	RA	BTN2A1
leafcutter	RA	SL1344	6:26463525:26465218:clu_16492	rs12195971	1001	0.000122505	0.00508522	0.0170067	0.70568	0.272106	2.5597e-15	2.5e-08	rs148333907	rs6913550	0.977786	0.278288	RA	BTN2A1
leafcutter	RA	SL1344	6:26463525:26465218:clu_16492	rs72840194	958	0.000175104	0.00630381	0.0181337	0.6525	0.322888	2.5597e-15	2.5e-08	rs148333907	rs6913550	0.975387	0.331035	RA	BTN2A1
leafcutter	RA	IFNg_SL1344	6:26463525:26465218:clu_16492	rs41267923	996	0.000734492	0.00291099	0.0963223	0.381233	0.518799	2.11326e-11	2.5e-08	rs148333907	rs6913550	0.900032	0.576423	RA	BTN2A1
leafcutter	RA	IFNg_SL1344	6:26463525:26465218:clu_16492	rs12195971	1001	0.000712207	0.0028213	0.0988716	0.391158	0.506437	2.11326e-11	2.5e-08	rs148333907	rs6913550	0.897595	0.564215	RA	BTN2A1
leafcutter	RA	IFNg_SL1344	6:26463525:26465218:clu_16492	rs72840194	958	0.000942739	0.00292599	0.09763	0.30242	0.596082	2.11326e-11	2.5e-08	rs148333907	rs6913550	0.898501	0.663418	RA	BTN2A1
leafcutter	RA	naive	6:33709763:33710695:clu_16841	rs2296330	1354	8.14799e-37	1.68757e-37	0.17087	0.0345952	0.794535	4.67338e-06	2.4e-42	rs9469556	rs9469556	0.82913	0.958275	RA	UQCC2
leafcutter	RA	naive	6:33709763:33710695:clu_16841	rs9380374	1350	8.14614e-37	1.698e-37	0.170831	0.0348141	0.794355	4.67338e-06	2.4e-42	rs9469556	rs9469556	0.829169	0.958013	RA	UQCC2
leafcutter	RA	IFNg	6:33709763:33710695:clu_16841	rs2296330	1354	3.61562e-36	4.68549e-37	0.758223	0.0981148	0.143662	0.0025331	2.4e-42	rs145176619	rs9469556	0.241777	0.594193	RA	UQCC2
leafcutter	RA	IFNg	6:33709763:33710695:clu_16841	rs9380374	1350	3.61056e-36	4.74562e-37	0.757163	0.0993759	0.143461	0.0025331	2.4e-42	rs145176619	rs9469556	0.242837	0.590771	RA	UQCC2
leafcutter	RA	SL1344	6:33709763:33710695:clu_16841	rs2296330	1354	8.52112e-37	1.63161e-37	0.178695	0.0334282	0.787877	2.41318e-06	2.4e-42	rs9380374	rs9469556	0.821305	0.959299	RA	UQCC2
leafcutter	RA	SL1344	6:33709763:33710695:clu_16841	rs9380374	1350	8.52133e-37	1.63048e-37	0.178699	0.0334045	0.787897	2.41318e-06	2.4e-42	rs9380374	rs9469556	0.821301	0.959327	RA	UQCC2
leafcutter	RA	IFNg_SL1344	6:33709763:33710695:clu_16841	rs2296330	1354	3.95266e-36	4.86354e-37	0.828903	0.101923	0.0691739	0.00533546	2.4e-42	rs199830360	rs9469556	0.171097	0.404296	RA	UQCC2
leafcutter	RA	IFNg_SL1344	6:33709763:33710695:clu_16841	rs9380374	1350	3.95547e-36	4.83305e-37	0.829493	0.101284	0.0692232	0.00533546	2.4e-42	rs199830360	rs9469556	0.170507	0.405985	RA	UQCC2
leafcutter	RA	naive	11:61828597:61837778:clu_23154	rs7943728	599	0.00722627	0.012999	0.0548072	0.0977628	0.827205	6.70286e-08	7.4e-07	rs174559	rs968567	0.924968	0.894307	RA	FADS2;FEN1;FADS1
leafcutter	RA	IFNg	11:61828597:61837778:clu_23154	rs7943728	599	0.0129714	0.0105309	0.0983808	0.079072	0.799045	6.97832e-07	7.4e-07	rs7943728	rs968567	0.878117	0.909953	RA	FADS2;FEN1;FADS1
leafcutter	RA	SL1344	11:61828597:61837778:clu_23154	rs7943728	599	0.0615474	0.00843942	0.466803	0.0636087	0.399602	6.16491e-05	7.4e-07	rs174544	rs968567	0.46321	0.862679	RA	FADS2;FEN1;FADS1
leafcutter	RA	IFNg_SL1344	11:61828597:61837778:clu_23154	rs7943728	599	0.0813735	0.00865822	0.617173	0.0654404	0.227355	0.000166571	7.4e-07	rs174475	rs968567	0.292795	0.776498	RA	FADS2;FEN1;FADS1
leafcutter	SCZ	naive	4:169621063:169630165:clu_14229	rs7696555	795	2.21132e-05	6.68676e-05	0.0168407	0.0499911	0.933079	7.92209e-09	1.02e-08	rs7696555	rs10520163	0.98307	0.949148	SCZ	CLCN3
leafcutter	SCZ	IFNg	4:169621063:169630165:clu_14229	rs7696555	795	0.000432438	9.59062e-05	0.329331	0.0724414	0.597699	6.04382e-05	1.02e-08	rs7696352	rs10520163	0.670141	0.891901	SCZ	CLCN3
leafcutter	SCZ	SL1344	4:169621063:169630165:clu_14229	rs7696555	795	0.00110086	8.01926e-05	0.838379	0.0609726	0.0994672	0.0402608	1.02e-08	rs12647010	rs10520163	0.16044	0.619966	SCZ	CLCN3
leafcutter	SCZ	IFNg_SL1344	4:169621063:169630165:clu_14229	rs7696555	795	0.00109988	9.105e-05	0.837631	0.0692488	0.0919293	0.0228445	1.02e-08	rs72621985	rs10520163	0.161178	0.570359	SCZ	CLCN3
leafcutter	SCZ	naive	14:103571820:103587274:clu_31426	rs59104875	821	7.87646e-11	6.29265e-09	0.00278277	0.221545	0.775672	1.08094e-11	1.172e-13	rs28513222	rs12887734	0.997217	0.777837	SCZ	APOPT1;RP11-73M18.2
leafcutter	SCZ	naive	14:103563124:103587274:clu_31426	rs12884809	801	1.55556e-11	1.54126e-09	0.000588241	0.0573413	0.94207	2.05778e-11	1.172e-13	rs10431750	rs12887734	0.999412	0.942625	SCZ	APOPT1;RP11-73M18.2
leafcutter	SCZ	naive	14:103563124:103587274:clu_31426	rs4906347	803	1.55596e-11	1.5443e-09	0.000584995	0.057119	0.942296	2.05778e-11	1.172e-13	rs10431750	rs12887734	0.999415	0.942848	SCZ	APOPT1;RP11-73M18.2
leafcutter	SCZ	naive	14:103571820:103587274:clu_31426	rs7140558	830	7.90031e-11	6.25822e-09	0.00277884	0.219347	0.777874	1.08094e-11	1.172e-13	rs28513222	rs12887734	0.997221	0.780042	SCZ	APOPT1;RP11-73M18.2
leafcutter	SCZ	IFNg	14:103571820:103587274:clu_31426	rs59104875	821	3.83067e-10	2.18471e-09	0.0135338	0.076276	0.91019	2.89488e-08	1.172e-13	rs10431750	rs12887734	0.986466	0.922678	SCZ	APOPT1;RP11-73M18.2
leafcutter	SCZ	IFNg	14:103563124:103587274:clu_31426	rs12884809	801	4.15015e-10	3.75469e-09	0.0156939	0.141142	0.843164	4.96501e-09	1.172e-13	rs12884809	rs12887734	0.984306	0.856608	SCZ	APOPT1;RP11-73M18.2
leafcutter	SCZ	IFNg	14:103563124:103587274:clu_31426	rs4906347	803	4.16254e-10	3.75346e-09	0.0156499	0.140275	0.844075	4.96501e-09	1.172e-13	rs12884809	rs12887734	0.98435	0.857495	SCZ	APOPT1;RP11-73M18.2
leafcutter	SCZ	IFNg	14:103571820:103587274:clu_31426	rs7140558	830	3.83005e-10	2.20697e-09	0.0134717	0.0767178	0.90981	2.89488e-08	1.172e-13	rs10431750	rs12887734	0.986528	0.922235	SCZ	APOPT1;RP11-73M18.2
leafcutter	SCZ	SL1344	14:103571820:103587274:clu_31426	rs59104875	821	1.45423e-10	2.23784e-09	0.00513782	0.0781468	0.916715	2.87716e-09	1.172e-13	rs4906347	rs12887734	0.994862	0.92145	SCZ	APOPT1;RP11-73M18.2
leafcutter	SCZ	SL1344	14:103563124:103587274:clu_31426	rs12884809	801	3.99186e-11	1.61967e-09	0.00150954	0.0603101	0.93818	1.58248e-10	1.172e-13	rs4906347	rs12887734	0.99849	0.939599	SCZ	APOPT1;RP11-73M18.2
leafcutter	SCZ	SL1344	14:103563124:103587274:clu_31426	rs4906347	803	3.99303e-11	1.62413e-09	0.00150126	0.060124	0.938375	1.58248e-10	1.172e-13	rs4906347	rs12887734	0.998499	0.939786	SCZ	APOPT1;RP11-73M18.2
leafcutter	SCZ	SL1344	14:103571820:103587274:clu_31426	rs7140558	830	1.45499e-10	2.23714e-09	0.00511775	0.0777715	0.917111	2.87716e-09	1.172e-13	rs4906347	rs12887734	0.994882	0.921828	SCZ	APOPT1;RP11-73M18.2
leafcutter	SCZ	IFNg_SL1344	14:103571820:103587274:clu_31426	rs59104875	821	6.39767e-10	2.97413e-09	0.0226031	0.104203	0.873193	4.75162e-08	1.172e-13	rs7140558	rs12887734	0.977397	0.893387	SCZ	APOPT1;RP11-73M18.2
leafcutter	SCZ	IFNg_SL1344	14:103563124:103587274:clu_31426	rs12884809	801	1.87779e-09	5.45514e-09	0.0710094	0.205565	0.723426	6.04318e-07	1.172e-13	rs28513222	rs12887734	0.928991	0.778722	SCZ	APOPT1;RP11-73M18.2
leafcutter	SCZ	IFNg_SL1344	14:103563124:103587274:clu_31426	rs4906347	803	1.90258e-09	5.25866e-09	0.0715315	0.196979	0.73149	6.04318e-07	1.172e-13	rs28513222	rs12887734	0.928468	0.787846	SCZ	APOPT1;RP11-73M18.2
leafcutter	SCZ	IFNg_SL1344	14:103571820:103587274:clu_31426	rs7140558	830	6.40996e-10	2.95192e-09	0.0225462	0.102956	0.874498	4.75162e-08	1.172e-13	rs7140558	rs12887734	0.977454	0.89467	SCZ	APOPT1;RP11-73M18.2
leafcutter	SCZ	naive	3:52686055:52686769:clu_7202	rs11235	628	3.4441e-07	7.8709e-07	0.0243699	0.0547724	0.920857	2.30953e-08	3.956e-11	rs11235	rs2535627	0.975629	0.943859	SCZ	GNL3
leafcutter	SCZ	naive	3:52686055:52686769:clu_7202	rs1108842	623	3.44842e-07	7.85489e-07	0.0241686	0.0541301	0.9217	2.30953e-08	3.956e-11	rs11235	rs2535627	0.97583	0.944529	SCZ	GNL3
leafcutter	SCZ	naive	3:52686055:52686769:clu_7202	rs2302417	682	3.26642e-07	7.39759e-07	0.0358573	0.0803236	0.883818	2.30953e-08	3.956e-11	rs11235	rs2535627	0.964142	0.916689	SCZ	GNL3
leafcutter	SCZ	IFNg	3:52686055:52686769:clu_7202	rs11235	628	1.12562e-07	6.51268e-07	0.00796468	0.0451358	0.946899	9.04394e-09	3.956e-11	rs7636227	rs2535627	0.992035	0.954502	SCZ	GNL3
leafcutter	SCZ	IFNg	3:52686055:52686769:clu_7202	rs1108842	623	1.12627e-07	6.56943e-07	0.0078936	0.0450954	0.94701	9.04394e-09	3.956e-11	rs7636227	rs2535627	0.992106	0.954546	SCZ	GNL3
leafcutter	SCZ	IFNg	3:52686055:52686769:clu_7202	rs2302417	682	1.10111e-07	4.59599e-07	0.0120875	0.0495144	0.938398	1.14601e-08	3.956e-11	rs2590838	rs2535627	0.987912	0.94988	SCZ	GNL3
leafcutter	SCZ	SL1344	3:52686055:52686769:clu_7202	rs11235	628	1.98532e-06	1.53495e-06	0.140478	0.107859	0.751659	1.41532e-06	3.956e-11	rs2302417	rs2535627	0.859518	0.874512	SCZ	GNL3
leafcutter	SCZ	SL1344	3:52686055:52686769:clu_7202	rs1108842	623	1.99048e-06	1.54532e-06	0.139505	0.107552	0.75294	1.41532e-06	3.956e-11	rs2302417	rs2535627	0.860492	0.875011	SCZ	GNL3
leafcutter	SCZ	SL1344	3:52686055:52686769:clu_7202	rs2302417	682	1.70854e-06	1.21298e-06	0.187556	0.132476	0.679965	1.41532e-06	3.956e-11	rs2302417	rs2535627	0.812441	0.836941	SCZ	GNL3
leafcutter	SCZ	IFNg_SL1344	3:52686055:52686769:clu_7202	rs11235	628	3.53956e-08	8.72584e-07	0.00250453	0.060806	0.936689	1.74751e-10	3.956e-11	rs2590838	rs2535627	0.997495	0.939041	SCZ	GNL3
leafcutter	SCZ	IFNg_SL1344	3:52686055:52686769:clu_7202	rs1108842	623	3.55191e-08	8.57051e-07	0.00248939	0.0591288	0.938381	1.74751e-10	3.956e-11	rs2590838	rs2535627	0.99751	0.940724	SCZ	GNL3
leafcutter	SCZ	IFNg_SL1344	3:52686055:52686769:clu_7202	rs2302417	682	2.89357e-08	7.84526e-07	0.00317643	0.0852101	0.911613	1.74751e-10	3.956e-11	rs2590838	rs2535627	0.996823	0.914518	SCZ	GNL3
leafcutter	SCZ	naive	19:19630336:19630471:clu_36791	rs880090	707	0.000251417	6.43634e-05	0.376544	0.0958688	0.527272	1.97646e-06	1.007e-08	rs880090	rs4808967	0.623141	0.846152	SCZ	LPAR2;GMIP
leafcutter	SCZ	IFNg	19:19630336:19630471:clu_36791	rs880090	707	9.57473e-05	4.81606e-05	0.143399	0.0713443	0.785113	2.34705e-06	1.007e-08	rs880090	rs4808967	0.856457	0.916698	SCZ	LPAR2;GMIP
leafcutter	SCZ	SL1344	19:19630336:19630471:clu_36791	rs880090	707	0.000487807	5.34756e-05	0.730581	0.0799005	0.188977	0.000506196	1.007e-08	rs10402308	rs4808967	0.268877	0.702837	SCZ	LPAR2;GMIP
leafcutter	SCZ	IFNg_SL1344	19:19630336:19630471:clu_36791	rs880090	707	0.000535994	4.70123e-05	0.80275	0.0702831	0.126384	0.0016767	1.007e-08	rs28493908	rs4808967	0.196667	0.642629	SCZ	LPAR2;GMIP
leafcutter	SCZ	naive	7:44579628:44581093:clu_14873	rs217354	598	0.000717627	0.00743038	0.00541487	0.0551348	0.931302	8.61671e-10	7.072e-07	rs217354	rs540425	0.986437	0.944107	SCZ	TMED4
leafcutter	SCZ	naive	7:44579628:44581449:clu_14873	rs4407779	598	0.0028762	0.0110946	0.0216938	0.0827999	0.881536	4.37339e-08	7.072e-07	rs113959102	rs540425	0.964335	0.914138	SCZ	TMED4
leafcutter	SCZ	naive	7:44579628:44581449:clu_14873	rs540425	598	0.00287418	0.0110907	0.0218113	0.0832835	0.88094	4.37339e-08	7.072e-07	rs113959102	rs540425	0.964224	0.913626	SCZ	TMED4
leafcutter	SCZ	IFNg	7:44579628:44581093:clu_14873	rs217354	598	7.31963e-05	0.00815835	0.000552304	0.0606284	0.930588	2.12735e-11	7.072e-07	rs217384	rs540425	0.991216	0.938834	SCZ	TMED4
leafcutter	SCZ	IFNg	7:44579628:44581449:clu_14873	rs4407779	598	2.47612e-05	0.0213029	0.000186762	0.159859	0.818627	1.07873e-13	7.072e-07	rs4407779	rs540425	0.978486	0.836626	SCZ	TMED4
leafcutter	SCZ	IFNg	7:44579628:44581449:clu_14873	rs540425	598	2.47368e-05	0.0212819	0.000187721	0.160685	0.817821	1.07873e-13	7.072e-07	rs4407779	rs540425	0.978506	0.835785	SCZ	TMED4
leafcutter	SCZ	SL1344	7:44579628:44581093:clu_14873	rs217354	598	0.0539111	0.0104554	0.406787	0.0784413	0.450405	8.56563e-05	7.072e-07	rs200228714	rs540425	0.528847	0.851675	SCZ	TMED4
leafcutter	SCZ	SL1344	7:44579628:44581449:clu_14873	rs4407779	598	0.000671822	0.0182194	0.00506723	0.136581	0.839461	2.72153e-10	7.072e-07	rs4407779	rs540425	0.976042	0.860067	SCZ	TMED4
leafcutter	SCZ	SL1344	7:44579628:44581449:clu_14873	rs540425	598	0.00067123	0.018204	0.00509378	0.137306	0.838725	2.72153e-10	7.072e-07	rs4407779	rs540425	0.976031	0.859322	SCZ	TMED4
leafcutter	SCZ	IFNg_SL1344	7:44579628:44581093:clu_14873	rs217354	598	0.0136986	0.0104097	0.103363	0.0777519	0.794776	3.1529e-06	7.072e-07	rs217354	rs540425	0.872528	0.910889	SCZ	TMED4
leafcutter	SCZ	IFNg_SL1344	7:44579628:44581449:clu_14873	rs4407779	598	0.000160655	0.00713668	0.00121174	0.0528899	0.938601	2.56313e-10	7.072e-07	rs540425	rs540425	0.991491	0.946656	SCZ	TMED4
leafcutter	SCZ	IFNg_SL1344	7:44579628:44581449:clu_14873	rs540425	598	0.000160601	0.00713424	0.00121875	0.0532015	0.938285	2.56313e-10	7.072e-07	rs540425	rs540425	0.991486	0.946342	SCZ	TMED4
leafcutter	SCZ	naive	15:40288918:40289272:clu_29166	rs56205728	743	6.01475e-08	0.000299731	1.99312e-06	0.00894149	0.990757	8.29345e-18	4.92e-08	rs56205728	rs56205728	0.999698	0.991056	SCZ	PLCB2
leafcutter	SCZ	naive	15:40288642:40289272:clu_29166	rs143550864	740	3.33379e-05	0.00115579	0.00110472	0.0373392	0.960367	2.13865e-12	4.92e-08	rs2305645	rs56205728	0.997706	0.962575	SCZ	PLCB2
leafcutter	SCZ	naive	15:40288918:40289272:clu_29166	rs11857340	740	6.01475e-08	0.000299731	1.99312e-06	0.0089415	0.990757	8.29345e-18	4.92e-08	rs56205728	rs56205728	0.999698	0.991056	SCZ	PLCB2
leafcutter	SCZ	IFNg	15:40288918:40289272:clu_29166	rs56205728	743	0.00142618	0.001482	0.0472597	0.0482077	0.901624	6.79478e-09	4.92e-08	rs3743138	rs56205728	0.949832	0.949246	SCZ	PLCB2
leafcutter	SCZ	IFNg	15:40288642:40289272:clu_29166	rs143550864	740	0.000238868	0.000754034	0.00791539	0.0240195	0.967072	3.0057e-10	4.92e-08	rs143550864	rs56205728	0.991092	0.975765	SCZ	PLCB2
leafcutter	SCZ	IFNg	15:40288918:40289272:clu_29166	rs11857340	740	0.0014262	0.00148171	0.0472602	0.0481982	0.901634	6.79478e-09	4.92e-08	rs3743138	rs56205728	0.949832	0.949256	SCZ	PLCB2
leafcutter	SCZ	SL1344	15:40288918:40289272:clu_29166	rs56205728	743	0.00591671	0.000972067	0.196063	0.0314459	0.765602	2.52054e-06	4.92e-08	rs11857340	rs56205728	0.797048	0.960547	SCZ	PLCB2
leafcutter	SCZ	SL1344	15:40288642:40289272:clu_29166	rs143550864	740	0.0154385	0.00161395	0.511588	0.0530635	0.418296	9.40354e-05	4.92e-08	rs11857340	rs56205728	0.47136	0.887425	SCZ	PLCB2
leafcutter	SCZ	SL1344	15:40288918:40289272:clu_29166	rs11857340	740	0.00591663	0.000972461	0.196061	0.031459	0.765591	2.52054e-06	4.92e-08	rs11857340	rs56205728	0.79705	0.960531	SCZ	PLCB2
leafcutter	SCZ	IFNg_SL1344	15:40288918:40289272:clu_29166	rs56205728	743	0.0197471	0.00162878	0.654364	0.0537025	0.270557	0.00074546	4.92e-08	rs1869901	rs56205728	0.32426	0.834384	SCZ	PLCB2
leafcutter	SCZ	IFNg_SL1344	15:40288642:40289272:clu_29166	rs143550864	740	0.0241872	0.00174205	0.801495	0.0576116	0.114964	0.00581956	4.92e-08	rs74611833	rs56205728	0.172576	0.666166	SCZ	PLCB2
leafcutter	SCZ	IFNg_SL1344	15:40288918:40289272:clu_29166	rs11857340	740	0.019754	0.00161917	0.654592	0.053384	0.270651	0.00074546	4.92e-08	rs1869901	rs56205728	0.324035	0.835252	SCZ	PLCB2
leafcutter	SLE	naive	2:190656153:190659158:clu_10508	rs2293765	720	6.80563e-18	2.60073e-15	1.44373e-05	0.00452165	0.995464	1.6501e-14	3.60855e-19	rs2293765	rs2293765	0.999986	0.995478	SLE	NAB1
leafcutter	SLE	IFNg	2:190656153:190659158:clu_10508	rs2293765	720	1.0699e-18	1.89336e-15	2.26965e-06	0.00301954	0.996978	2.51077e-16	3.60855e-19	rs2293765	rs2293765	0.999998	0.99698	SLE	NAB1
leafcutter	SLE	SL1344	2:190656153:190659158:clu_10508	rs2293765	720	6.16034e-20	9.55748e-16	1.30683e-07	0.00102852	0.998971	4.16715e-19	3.60855e-19	rs2293765	rs2293765	1	0.998971	SLE	NAB1
leafcutter	SLE	IFNg_SL1344	2:190656153:190659158:clu_10508	rs2293765	720	8.50543e-17	1.45167e-15	0.000180432	0.00208179	0.997738	2.66501e-12	3.60855e-19	rs2293765	rs2293765	0.99982	0.997918	SLE	NAB1
leafcutter	SLE	naive	11:408077:613206:clu_22392	rs7936397	1041	9.07236e-09	1.24907e-07	0.00493643	0.0670359	0.928028	2.71534e-11	2.96791e-11	rs7936397	rs58688157	0.995063	0.932632	SLE	SIGIRR;IRF7
leafcutter	SLE	naive	11:614037:614476:clu_22418	rs2740373	1021	3.66871e-07	1.16717e-07	0.199621	0.0627701	0.737609	6.66832e-07	2.96791e-11	rs2740373	rs58688157	0.800379	0.921575	SLE	IRF7
leafcutter	SLE	naive	11:408077:613206:clu_22392	rs7941547	1023	9.07241e-09	1.24897e-07	0.00493646	0.0670307	0.928033	2.71534e-11	2.96791e-11	rs7936397	rs58688157	0.995063	0.932637	SLE	SIGIRR;IRF7
leafcutter	SLE	naive	11:614037:614476:clu_22418	rs7101726	1029	3.66844e-07	1.16841e-07	0.199606	0.0628377	0.737555	6.66832e-07	2.96791e-11	rs2740373	rs58688157	0.800393	0.921491	SLE	IRF7
leafcutter	SLE	naive	11:613117:613206:clu_22392	rs7941547	1023	5.98436e-08	1.14503e-07	0.0325619	0.061397	0.906041	1.35836e-08	2.96791e-11	rs35865896	rs58688157	0.967438	0.936536	SLE	SIGIRR;IRF7
leafcutter	SLE	naive	11:614399:614476:clu_22418	rs7101726	1029	4.09191e-07	1.51355e-07	0.222648	0.0816592	0.695692	3.76377e-06	2.96791e-11	rs936472	rs58688157	0.777351	0.894952	SLE	IRF7
leafcutter	SLE	naive	11:614531:614797:clu_22419	rs11246217	1020	1.51795e-06	1.58273e-07	0.825944	0.086031	0.0880232	0.00531663	2.96791e-11	rs10902175	rs58688157	0.174054	0.505723	SLE	IRF7
leafcutter	SLE	naive	11:613117:613206:clu_22392	rs35865896	1034	5.9841e-08	1.14577e-07	0.0325605	0.0614374	0.906002	1.35836e-08	2.96791e-11	rs35865896	rs58688157	0.967439	0.936495	SLE	SIGIRR;IRF7
leafcutter	SLE	naive	11:614037:614476:clu_22418	rs1061502	1020	3.66876e-07	1.1669e-07	0.199624	0.0627557	0.73762	6.66832e-07	2.96791e-11	rs2740373	rs58688157	0.800376	0.921592	SLE	IRF7
leafcutter	SLE	IFNg	11:408077:613206:clu_22392	rs7936397	1041	3.31127e-14	7.60819e-08	1.80172e-08	0.0404379	0.959562	1.64695e-22	2.96791e-11	rs7941547	rs58688157	1	0.959562	SLE	SIGIRR;IRF7
leafcutter	SLE	IFNg	11:614037:614476:clu_22418	rs2740373	1021	6.66371e-09	9.56884e-08	0.00362584	0.0511205	0.945254	4.72486e-11	2.96791e-11	rs35865896	rs58688157	0.996374	0.948694	SLE	IRF7
leafcutter	SLE	IFNg	11:408077:613206:clu_22392	rs7941547	1023	3.31127e-14	7.60819e-08	1.80172e-08	0.0404379	0.959562	1.64695e-22	2.96791e-11	rs7941547	rs58688157	1	0.959562	SLE	SIGIRR;IRF7
leafcutter	SLE	IFNg	11:614037:614476:clu_22418	rs7101726	1029	6.66369e-09	9.56946e-08	0.00362583	0.0511239	0.94525	4.72486e-11	2.96791e-11	rs35865896	rs58688157	0.996374	0.94869	SLE	IRF7
leafcutter	SLE	IFNg	11:613117:613206:clu_22392	rs7941547	1023	2.19824e-13	7.68151e-08	1.1961e-07	0.0408373	0.959163	1.15532e-20	2.96791e-11	rs7941547	rs58688157	1	0.959163	SLE	SIGIRR;IRF7
leafcutter	SLE	IFNg	11:614399:614476:clu_22418	rs7101726	1029	1.68584e-08	1.20375e-07	0.00917296	0.0645718	0.926255	2.73876e-10	2.96791e-11	rs7936397	rs58688157	0.990827	0.93483	SLE	IRF7
leafcutter	SLE	IFNg	11:614531:614797:clu_22419	rs11246217	1020	1.38096e-06	1.44407e-07	0.751404	0.0784044	0.17019	0.00195647	2.96791e-11	rs79915070	rs58688157	0.248594	0.684609	SLE	IRF7
leafcutter	SLE	IFNg	11:613117:613206:clu_22392	rs35865896	1034	2.19824e-13	7.68151e-08	1.1961e-07	0.0408373	0.959163	1.15532e-20	2.96791e-11	rs7941547	rs58688157	1	0.959163	SLE	SIGIRR;IRF7
leafcutter	SLE	IFNg	11:614037:614476:clu_22418	rs1061502	1020	6.66371e-09	9.56876e-08	0.00362584	0.05112	0.945254	4.72486e-11	2.96791e-11	rs35865896	rs58688157	0.996374	0.948694	SLE	IRF7
leafcutter	SLE	SL1344	11:408077:613206:clu_22392	rs7936397	1041	5.78009e-13	7.52088e-08	3.14505e-07	0.0399624	0.960037	1.21544e-19	2.96791e-11	rs7941547	rs58688157	1	0.960038	SLE	SIGIRR;IRF7
leafcutter	SLE	SL1344	11:614037:614476:clu_22418	rs2740373	1021	2.09759e-09	8.28647e-08	0.00114133	0.0441334	0.954725	2.01532e-11	2.96791e-11	rs7941547	rs58688157	0.998859	0.955816	SLE	IRF7
leafcutter	SLE	SL1344	11:408077:613206:clu_22392	rs7941547	1023	5.78009e-13	7.52088e-08	3.14505e-07	0.0399624	0.960037	1.21544e-19	2.96791e-11	rs7941547	rs58688157	1	0.960038	SLE	SIGIRR;IRF7
leafcutter	SLE	SL1344	11:614037:614476:clu_22418	rs7101726	1029	2.09759e-09	8.28657e-08	0.00114133	0.044134	0.954725	2.01532e-11	2.96791e-11	rs7941547	rs58688157	0.998859	0.955816	SLE	IRF7
leafcutter	SLE	SL1344	11:613117:613206:clu_22392	rs7941547	1023	5.35095e-13	7.80189e-08	2.91155e-07	0.0414929	0.958507	8.87997e-20	2.96791e-11	rs7941547	rs58688157	1	0.958507	SLE	SIGIRR;IRF7
leafcutter	SLE	SL1344	11:614399:614476:clu_22418	rs7101726	1029	7.19565e-10	9.03062e-08	0.000391528	0.0481858	0.951423	6.22574e-13	2.96791e-11	rs35865896	rs58688157	0.999608	0.951795	SLE	IRF7
leafcutter	SLE	SL1344	11:614531:614797:clu_22419	rs11246217	1020	2.33887e-07	1.21814e-07	0.127262	0.0654737	0.807264	2.1972e-06	2.96791e-11	rs11246217	rs58688157	0.872738	0.924979	SLE	IRF7
leafcutter	SLE	SL1344	11:613117:613206:clu_22392	rs35865896	1034	5.35095e-13	7.80189e-08	2.91155e-07	0.0414929	0.958507	8.87997e-20	2.96791e-11	rs7941547	rs58688157	1	0.958507	SLE	SIGIRR;IRF7
leafcutter	SLE	SL1344	11:614037:614476:clu_22418	rs1061502	1020	2.09759e-09	8.28649e-08	0.00114133	0.0441335	0.954725	2.01532e-11	2.96791e-11	rs7941547	rs58688157	0.998859	0.955816	SLE	IRF7
leafcutter	SLE	IFNg_SL1344	11:408077:613206:clu_22392	rs7936397	1041	5.78112e-13	8.22358e-08	3.14561e-07	0.0437897	0.95621	1.03508e-19	2.96791e-11	rs35865896	rs58688157	1	0.95621	SLE	SIGIRR;IRF7
leafcutter	SLE	IFNg_SL1344	11:614037:614476:clu_22418	rs2740373	1021	6.79399e-10	8.50217e-08	0.000369673	0.0453075	0.954323	1.31426e-12	2.96791e-11	rs7941547	rs58688157	0.99963	0.954676	SLE	IRF7
leafcutter	SLE	IFNg_SL1344	11:408077:613206:clu_22392	rs7941547	1023	5.78112e-13	8.22358e-08	3.14561e-07	0.0437897	0.95621	1.03508e-19	2.96791e-11	rs35865896	rs58688157	1	0.95621	SLE	SIGIRR;IRF7
leafcutter	SLE	IFNg_SL1344	11:614037:614476:clu_22418	rs7101726	1029	6.79399e-10	8.50224e-08	0.000369673	0.0453078	0.954322	1.31426e-12	2.96791e-11	rs7941547	rs58688157	0.99963	0.954675	SLE	IRF7
leafcutter	SLE	IFNg_SL1344	11:613117:613206:clu_22392	rs7941547	1023	7.53195e-13	8.26808e-08	4.09827e-07	0.0440321	0.955967	9.90739e-20	2.96791e-11	rs35865896	rs58688157	1	0.955968	SLE	SIGIRR;IRF7
leafcutter	SLE	IFNg_SL1344	11:614399:614476:clu_22418	rs7101726	1029	6.06144e-09	9.88833e-08	0.00329813	0.0528603	0.943841	1.52772e-10	2.96791e-11	rs35865896	rs58688157	0.996702	0.946965	SLE	IRF7
leafcutter	SLE	IFNg_SL1344	11:614531:614797:clu_22419	rs11246217	1020	1.47228e-06	1.49785e-07	0.801091	0.0813833	0.117524	0.000851671	2.96791e-11	rs7396875	rs58688157	0.198907	0.590848	SLE	IRF7
leafcutter	SLE	IFNg_SL1344	11:613117:613206:clu_22392	rs35865896	1034	7.53195e-13	8.26808e-08	4.09827e-07	0.0440321	0.955967	9.90739e-20	2.96791e-11	rs35865896	rs58688157	1	0.955968	SLE	SIGIRR;IRF7
leafcutter	SLE	IFNg_SL1344	11:614037:614476:clu_22418	rs1061502	1020	6.79399e-10	8.50218e-08	0.000369673	0.0453075	0.954323	1.31426e-12	2.96791e-11	rs7941547	rs58688157	0.99963	0.954676	SLE	IRF7
leafcutter	CAD	naive	10:89247649:89251707:clu_25395	rs1332328	909	9.19675e-15	1.49192e-08	7.20567e-09	0.0106999	0.9893	1.29416e-22	5.15e-12	rs1332329	rs1412444	1	0.9893	CAD	LIPA
leafcutter	CAD	naive	10:89247649:89251707:clu_25395	rs2250644	909	9.19675e-15	1.49192e-08	7.20567e-09	0.0106999	0.9893	1.29416e-22	5.15e-12	rs1332329	rs1412444	1	0.9893	CAD	LIPA
leafcutter	CAD	IFNg	10:89247649:89251707:clu_25395	rs1332328	909	1.32931e-17	1.43417e-08	1.04152e-11	0.010247	0.989753	6.41937e-29	5.15e-12	rs1332329	rs1412444	1	0.989753	CAD	LIPA
leafcutter	CAD	IFNg	10:89247649:89251707:clu_25395	rs2250644	909	1.32931e-17	1.43417e-08	1.04152e-11	0.010247	0.989753	6.41937e-29	5.15e-12	rs1332329	rs1412444	1	0.989753	CAD	LIPA
leafcutter	CAD	SL1344	10:89247649:89251707:clu_25395	rs1332328	909	5.54387e-15	1.66855e-08	4.34363e-09	0.0120852	0.987915	2.64262e-23	5.15e-12	rs2246833	rs1412444	1	0.987915	CAD	LIPA
leafcutter	CAD	SL1344	10:89247649:89251707:clu_25395	rs2250644	909	5.54387e-15	1.66855e-08	4.34363e-09	0.0120852	0.987915	2.64262e-23	5.15e-12	rs2246833	rs1412444	1	0.987915	CAD	LIPA
leafcutter	CAD	IFNg_SL1344	10:89247649:89251707:clu_25395	rs1332328	909	1.4071e-15	1.50346e-08	1.10246e-09	0.0107904	0.98921	1.74612e-24	5.15e-12	rs1332329	rs1412444	1	0.98921	CAD	LIPA
leafcutter	CAD	IFNg_SL1344	10:89247649:89251707:clu_25395	rs2250644	909	1.4071e-15	1.50346e-08	1.10246e-09	0.0107904	0.98921	1.74612e-24	5.15e-12	rs1332329	rs1412444	1	0.98921	CAD	LIPA
leafcutter	CAD	naive	15:90884639:90885037:clu_30155	rs1894400	1031	1.37528e-11	0.000162839	1.637e-09	0.0184015	0.981436	1.1702e-24	5.01e-08	rs1894400	rs2521501	0.999837	0.981596	CAD	FES
leafcutter	CAD	IFNg	15:90884639:90885037:clu_30155	rs1894400	1031	3.14782e-10	0.000164606	3.74687e-08	0.0186119	0.981223	9.82251e-22	5.01e-08	rs1894400	rs2521501	0.999835	0.981385	CAD	FES
leafcutter	CAD	SL1344	15:90884639:90885037:clu_30155	rs1894400	1031	0.00580756	0.00063071	0.691278	0.0748464	0.227437	0.00329291	5.01e-08	rs145583381	rs2521501	0.302284	0.752397	CAD	FES
leafcutter	CAD	IFNg_SL1344	15:90884639:90885037:clu_30155	rs1894400	1031	0.00523438	0.000598015	0.623053	0.070882	0.300233	0.000206982	5.01e-08	rs11635900	rs2521501	0.371115	0.809003	CAD	FES
leafcutter	CAD	naive	1:154449980:154465134:clu_4923	rs61812598	899	1.34889e-07	0.000126821	0.000279094	0.261661	0.737932	1.70429e-14	2.6e-09	rs11265613	rs6689306	0.999594	0.738232	CAD	IL6R
leafcutter	CAD	naive	1:154449980:154465134:clu_4923	rs10539207	906	1.34889e-07	0.000126821	0.000279094	0.261661	0.737933	1.70429e-14	2.6e-09	rs11265613	rs6689306	0.999594	0.738232	CAD	IL6R
leafcutter	CAD	IFNg	1:154449980:154465134:clu_4923	rs61812598	899	1.04317e-09	0.000143225	2.15838e-06	0.295636	0.704219	1.55693e-19	2.6e-09	rs11265613	rs6689306	0.999855	0.704321	CAD	IL6R
leafcutter	CAD	IFNg	1:154449980:154465134:clu_4923	rs10539207	906	1.04317e-09	0.000143225	2.15838e-06	0.295636	0.704219	1.55693e-19	2.6e-09	rs11265613	rs6689306	0.999855	0.704321	CAD	IL6R
leafcutter	CAD	SL1344	1:154449980:154465134:clu_4923	rs61812598	899	0.000154745	5.74776e-05	0.320177	0.118363	0.561248	3.7456e-06	2.6e-09	rs10539207	rs6689306	0.679611	0.825837	CAD	IL6R
leafcutter	CAD	SL1344	1:154449980:154465134:clu_4923	rs10539207	906	0.000154735	5.75059e-05	0.320155	0.118422	0.561211	3.7456e-06	2.6e-09	rs10539207	rs6689306	0.679632	0.825756	CAD	IL6R
leafcutter	CAD	IFNg_SL1344	1:154449980:154465134:clu_4923	rs61812598	899	8.58167e-07	4.19129e-05	0.0017756	0.0858078	0.912374	3.30841e-11	2.6e-09	rs11265613	rs6689306	0.998182	0.914036	CAD	IL6R
leafcutter	CAD	IFNg_SL1344	1:154449980:154465134:clu_4923	rs10539207	906	8.58166e-07	4.19132e-05	0.00177559	0.0858084	0.912373	3.30841e-11	2.6e-09	rs11265613	rs6689306	0.998182	0.914035	CAD	IL6R
leafcutter	CAD	naive	2:85581876:85591725:clu_9546	rs13411109	964	2.30405e-06	6.70193e-06	0.0564224	0.163339	0.780229	2.35003e-09	3.62e-10	rs13411109	rs7568458	0.943569	0.826892	CAD	VAMP8;VAMP5
leafcutter	CAD	naive	2:85581876:85591725:clu_9546	rs1562323	950	2.30436e-06	6.69741e-06	0.0564299	0.163228	0.780333	2.35003e-09	3.62e-10	rs13411109	rs7568458	0.943561	0.827008	CAD	VAMP8;VAMP5
leafcutter	CAD	IFNg	2:85581876:85591725:clu_9546	rs13411109	964	2.07834e-09	2.91519e-06	5.0895e-05	0.0704586	0.929488	2.83564e-14	3.62e-10	rs3731827	rs7568458	0.999946	0.929538	CAD	VAMP8;VAMP5
leafcutter	CAD	IFNg	2:85581876:85591725:clu_9546	rs1562323	950	2.07834e-09	2.91518e-06	5.0895e-05	0.0704584	0.929488	2.83564e-14	3.62e-10	rs3731827	rs7568458	0.999946	0.929538	CAD	VAMP8;VAMP5
leafcutter	CAD	SL1344	2:85581876:85591725:clu_9546	rs13411109	964	1.59796e-07	3.40215e-06	0.00391314	0.0823995	0.913684	3.20071e-10	3.62e-10	rs3731827	rs7568458	0.996083	0.917277	CAD	VAMP8;VAMP5
leafcutter	CAD	SL1344	2:85581876:85591725:clu_9546	rs1562323	950	1.59803e-07	3.40055e-06	0.00391331	0.0823601	0.913723	3.20071e-10	3.62e-10	rs3731827	rs7568458	0.996083	0.917316	CAD	VAMP8;VAMP5
leafcutter	CAD	IFNg_SL1344	2:85581876:85591725:clu_9546	rs13411109	964	4.69734e-07	4.30991e-06	0.011503	0.104659	0.883833	8.99154e-10	3.62e-10	rs13411109	rs7568458	0.988492	0.894123	CAD	VAMP8;VAMP5
leafcutter	CAD	IFNg_SL1344	2:85581876:85591725:clu_9546	rs1562323	950	4.69782e-07	4.30616e-06	0.0115042	0.104567	0.883924	8.99154e-10	3.62e-10	rs13411109	rs7568458	0.988491	0.894216	CAD	VAMP8;VAMP5
leafcutter	MI	naive	15:90884639:90885037:clu_30155	rs1894400	1031	3.02429e-11	0.000358091	3.06281e-09	0.0353008	0.964341	1.1702e-24	7.38837e-08	rs1894400	rs11372849	0.999642	0.964687	MI	FES
leafcutter	MI	IFNg	15:90884639:90885037:clu_30155	rs1894400	1031	6.74407e-10	0.000352661	6.82996e-08	0.0347503	0.964897	9.82251e-22	7.38837e-08	rs1894400	rs11372849	0.999647	0.965237	MI	FES
leafcutter	MI	SL1344	15:90884639:90885037:clu_30155	rs1894400	1031	0.00722281	0.000784408	0.73148	0.0792586	0.181254	0.00329291	7.38837e-08	rs145583381	rs11372849	0.260513	0.69576	MI	FES
leafcutter	MI	IFNg_SL1344	15:90884639:90885037:clu_30155	rs1894400	1031	0.00697572	0.000796959	0.706457	0.0805056	0.205265	0.000206982	7.38837e-08	rs11635900	rs11372849	0.285771	0.718286	MI	FES
leafcutter	MI	naive	1:154449980:154465134:clu_4923	rs61812598	899	6.45745e-06	0.00607119	0.000524049	0.492202	0.501196	1.70429e-14	1.17903e-07	rs11265613	rs12118721	0.993398	0.504527	MI	IL6R
leafcutter	MI	naive	1:154449980:154465134:clu_4923	rs10539207	906	6.45742e-06	0.00607117	0.000524051	0.492204	0.501195	1.70429e-14	1.17903e-07	rs11265613	rs12118721	0.993398	0.504526	MI	IL6R
leafcutter	MI	IFNg	1:154449980:154465134:clu_4923	rs61812598	899	6.68691e-08	0.00918095	5.42672e-06	0.744828	0.245986	1.55693e-19	1.17903e-07	rs11265613	rs12118721	0.990814	0.248266	MI	IL6R
leafcutter	MI	IFNg	1:154449980:154465134:clu_4923	rs10539207	906	6.68688e-08	0.0091809	5.42673e-06	0.744829	0.245985	1.55693e-19	1.17903e-07	rs11265613	rs12118721	0.990814	0.248265	MI	IL6R
leafcutter	MI	SL1344	1:154449980:154465134:clu_4923	rs61812598	899	0.00454822	0.00168936	0.369108	0.136611	0.488044	3.7456e-06	1.17903e-07	rs10539207	rs12118721	0.624655	0.781302	MI	IL6R
leafcutter	MI	SL1344	1:154449980:154465134:clu_4923	rs10539207	906	0.00454785	0.00169017	0.36908	0.136678	0.488004	3.7456e-06	1.17903e-07	rs10539207	rs12118721	0.624682	0.781205	MI	IL6R
leafcutter	MI	IFNg_SL1344	1:154449980:154465134:clu_4923	rs61812598	899	2.17915e-05	0.0010643	0.00176847	0.0854606	0.911685	3.30841e-11	1.17903e-07	rs11265613	rs12118721	0.997145	0.914295	MI	IL6R
leafcutter	MI	IFNg_SL1344	1:154449980:154465134:clu_4923	rs10539207	906	2.17915e-05	0.00106431	0.00176848	0.0854619	0.911684	3.30841e-11	1.17903e-07	rs11265613	rs12118721	0.997145	0.914293	MI	IL6R
leafcutter	MI	naive	10:89247649:89251707:clu_25395	rs1332328	909	5.21433e-16	8.4588e-10	5.68782e-09	0.00823514	0.991765	1.29416e-22	2.6849e-13	rs1332329	rs1332329	1	0.991765	MI	LIPA
leafcutter	MI	naive	10:89247649:89251707:clu_25395	rs2250644	909	5.21433e-16	8.4588e-10	5.68782e-09	0.00823514	0.991765	1.29416e-22	2.6849e-13	rs1332329	rs1332329	1	0.991765	MI	LIPA
leafcutter	MI	IFNg	10:89247649:89251707:clu_25395	rs1332328	909	7.21e-19	7.77874e-10	7.8647e-12	0.00749258	0.992507	6.41937e-29	2.6849e-13	rs1332329	rs1332329	1	0.992507	MI	LIPA
leafcutter	MI	IFNg	10:89247649:89251707:clu_25395	rs2250644	909	7.21e-19	7.77874e-10	7.8647e-12	0.00749258	0.992507	6.41937e-29	2.6849e-13	rs1332329	rs1332329	1	0.992507	MI	LIPA
leafcutter	MI	SL1344	10:89247649:89251707:clu_25395	rs1332328	909	3.60679e-16	1.08554e-09	3.9343e-09	0.010852	0.989148	2.64262e-23	2.6849e-13	rs2246833	rs1332329	1	0.989148	MI	LIPA
leafcutter	MI	SL1344	10:89247649:89251707:clu_25395	rs2250644	909	3.60679e-16	1.08554e-09	3.9343e-09	0.010852	0.989148	2.64262e-23	2.6849e-13	rs2246833	rs1332329	1	0.989148	MI	LIPA
leafcutter	MI	IFNg_SL1344	10:89247649:89251707:clu_25395	rs1332328	909	7.68682e-17	8.21323e-10	8.38482e-10	0.007967	0.992033	1.74612e-24	2.6849e-13	rs1332329	rs1332329	1	0.992033	MI	LIPA
leafcutter	MI	IFNg_SL1344	10:89247649:89251707:clu_25395	rs2250644	909	7.68682e-17	8.21323e-10	8.38482e-10	0.007967	0.992033	1.74612e-24	2.6849e-13	rs1332329	rs1332329	1	0.992033	MI	LIPA
leafcutter	MI	naive	7:140026348:140028613:clu_15923	rs2286198	739	0.000184639	0.00105223	0.00362448	0.01968	0.975459	1.16735e-12	3.9163e-07	rs2286198	rs3735352	0.995139	0.980224	MI	PARP12
leafcutter	MI	naive	7:140026348:140028613:clu_15923	rs2286196	740	0.000184639	0.00105224	0.00362448	0.0196802	0.975458	1.16735e-12	3.9163e-07	rs2286198	rs3735352	0.995139	0.980224	MI	PARP12
leafcutter	MI	IFNg	7:140026348:140028613:clu_15923	rs2286198	739	1.05237e-05	0.00102706	0.000206581	0.0191818	0.979574	3.02343e-16	3.9163e-07	rs2286198	rs3735352	0.998756	0.980794	MI	PARP12
leafcutter	MI	IFNg	7:140026348:140028613:clu_15923	rs2286196	740	1.05237e-05	0.00102706	0.000206581	0.0191818	0.979574	3.02343e-16	3.9163e-07	rs2286198	rs3735352	0.998756	0.980794	MI	PARP12
leafcutter	MI	SL1344	7:140026348:140028613:clu_15923	rs2286198	739	1.36477e-05	0.00111018	0.000267906	0.0208151	0.977793	5.65068e-16	3.9163e-07	rs757835	rs3735352	0.998608	0.979156	MI	PARP12
leafcutter	MI	SL1344	7:140026348:140028613:clu_15923	rs2286196	740	1.36477e-05	0.00111018	0.000267906	0.0208151	0.977793	5.65068e-16	3.9163e-07	rs757835	rs3735352	0.998608	0.979156	MI	PARP12
leafcutter	MI	IFNg_SL1344	7:140026348:140028613:clu_15923	rs2286198	739	9.53005e-06	0.00101223	0.000187076	0.0188903	0.979901	1.19222e-16	3.9163e-07	rs2286198	rs3735352	0.998791	0.981087	MI	PARP12
leafcutter	MI	IFNg_SL1344	7:140026348:140028613:clu_15923	rs2286196	740	9.53005e-06	0.00101223	0.000187076	0.0188903	0.979901	1.19222e-16	3.9163e-07	rs2286198	rs3735352	0.998791	0.981087	MI	PARP12
leafcutter	CRP	naive	1:154449980:154465134:clu_4923	rs61812598	942	1.78975e-17	1.72162e-14	6.26054e-05	0.0592814	0.940656	1.70429e-14	1.99e-18	rs11265613	rs4393147	0.999937	0.940715	CRP	IL6R
leafcutter	CRP	naive	1:154449980:154465134:clu_4923	rs10539207	949	1.78975e-17	1.72162e-14	6.26054e-05	0.0592814	0.940656	1.70429e-14	1.99e-18	rs11265613	rs4393147	0.999937	0.940715	CRP	IL6R
leafcutter	CRP	IFNg	1:154449980:154465134:clu_4923	rs61812598	942	2.40202e-19	3.31264e-14	8.40222e-07	0.114991	0.885008	1.55693e-19	1.99e-18	rs11265613	rs4393147	0.999999	0.885009	CRP	IL6R
leafcutter	CRP	IFNg	1:154449980:154465134:clu_4923	rs10539207	949	2.40202e-19	3.31264e-14	8.40222e-07	0.114991	0.885008	1.55693e-19	1.99e-18	rs11265613	rs4393147	0.999999	0.885009	CRP	IL6R
leafcutter	CRP	SL1344	1:154449980:154465134:clu_4923	rs61812598	942	3.13052e-14	1.2706e-14	0.109505	0.0435986	0.846896	3.7456e-06	1.99e-18	rs10539207	rs4393147	0.890495	0.95104	CRP	IL6R
leafcutter	CRP	SL1344	1:154449980:154465134:clu_4923	rs10539207	949	3.13045e-14	1.27123e-14	0.109503	0.0436204	0.846877	3.7456e-06	1.99e-18	rs10539207	rs4393147	0.890497	0.951016	CRP	IL6R
leafcutter	CRP	IFNg_SL1344	1:154449980:154465134:clu_4923	rs61812598	942	2.94679e-16	1.49784e-14	0.00103078	0.0514466	0.947523	3.30841e-11	1.99e-18	rs11265613	rs4393147	0.998969	0.9485	CRP	IL6R
leafcutter	CRP	IFNg_SL1344	1:154449980:154465134:clu_4923	rs10539207	949	2.94679e-16	1.49785e-14	0.00103078	0.051447	0.947522	3.30841e-11	1.99e-18	rs11265613	rs4393147	0.998969	0.9485	CRP	IL6R
leafcutter	CRP	naive	2:113113114:113127689:clu_9895	rs7574159	1280	0.0280089	0.00415171	0.771109	0.114218	0.0825125	0.000650399	1.73e-07	rs13023005	rs55663133	0.19673	0.41942	CRP	IL1RN
leafcutter	CRP	naive	2:113113114:113127689:clu_9895	rs4251967	1234	0.0280914	0.00406107	0.773372	0.111721	0.082755	0.000650399	1.73e-07	rs13023005	rs55663133	0.194476	0.425529	CRP	IL1RN
leafcutter	CRP	IFNg	2:113113114:113127689:clu_9895	rs7574159	1280	2.38663e-05	0.00232536	0.000657059	0.0630855	0.933908	7.29391e-12	1.73e-07	rs13424580	rs55663133	0.996994	0.936724	CRP	IL1RN
leafcutter	CRP	IFNg	2:113113114:113127689:clu_9895	rs4251967	1234	2.38664e-05	0.00232525	0.000657054	0.0630815	0.933912	7.29391e-12	1.73e-07	rs13424580	rs55663133	0.996994	0.936728	CRP	IL1RN
leafcutter	CRP	SL1344	2:113113114:113127689:clu_9895	rs7574159	1280	0.00118743	0.0255649	0.0326909	0.703586	0.23697	1.35476e-10	1.73e-07	rs4251967	rs55663133	0.940557	0.251947	CRP	IL1RN
leafcutter	CRP	SL1344	2:113113114:113127689:clu_9895	rs4251967	1234	0.0011876	0.0255638	0.0326953	0.703548	0.237005	1.35476e-10	1.73e-07	rs4251967	rs55663133	0.940553	0.251985	CRP	IL1RN
leafcutter	CRP	IFNg_SL1344	2:113113114:113127689:clu_9895	rs7574159	1280	0.0289163	0.00357389	0.796093	0.0983192	0.0730975	0.00831523	1.73e-07	rs190452800	rs55663133	0.171417	0.426432	CRP	IL1RN
leafcutter	CRP	IFNg_SL1344	2:113113114:113127689:clu_9895	rs4251967	1234	0.0290107	0.00347162	0.79868	0.0955024	0.0733352	0.00831523	1.73e-07	rs190452800	rs55663133	0.168838	0.434354	CRP	IL1RN
leafcutter	HDL	naive	12:123945800:123972529:clu_28825	rs3186071	717	1.53404e-08	0.00343473	3.68054e-07	0.0814923	0.915073	1.42377e-19	9.95e-07	rs7301953	rs12824567	0.996565	0.918227	HDL	CCDC92
leafcutter	HDL	naive	12:123945800:123972529:clu_28825	rs4765335	721	1.53404e-08	0.00343473	3.68055e-07	0.0814926	0.915072	1.42377e-19	9.95e-07	rs7301953	rs12824567	0.996565	0.918226	HDL	CCDC92
leafcutter	HDL	naive	12:123945800:123972529:clu_28825	rs11338826	704	1.53407e-08	0.0034348	3.67974e-07	0.0814744	0.91509	1.42377e-19	9.95e-07	rs7301953	rs12824567	0.996565	0.918245	HDL	CCDC92
leafcutter	HDL	IFNg	12:123945800:123972529:clu_28825	rs3186071	717	5.81813e-10	0.00434656	1.39591e-08	0.103392	0.892261	2.57266e-23	9.95e-07	rs4765335	rs12824567	0.995653	0.896156	HDL	CCDC92
leafcutter	HDL	IFNg	12:123945800:123972529:clu_28825	rs4765335	721	5.81812e-10	0.00434656	1.39591e-08	0.103393	0.892261	2.57266e-23	9.95e-07	rs4765335	rs12824567	0.995653	0.896156	HDL	CCDC92
leafcutter	HDL	IFNg	12:123945800:123972529:clu_28825	rs11338826	704	5.81827e-10	0.00434667	1.39561e-08	0.10337	0.892283	2.57266e-23	9.95e-07	rs4765335	rs12824567	0.995653	0.896179	HDL	CCDC92
leafcutter	HDL	SL1344	12:123945800:123972529:clu_28825	rs3186071	717	5.68241e-09	0.00262441	1.36335e-07	0.0620306	0.935345	3.11479e-21	9.95e-07	rs7301953	rs12824567	0.997375	0.937806	HDL	CCDC92
leafcutter	HDL	SL1344	12:123945800:123972529:clu_28825	rs4765335	721	5.6824e-09	0.00262441	1.36335e-07	0.0620309	0.935345	3.11479e-21	9.95e-07	rs7301953	rs12824567	0.997375	0.937806	HDL	CCDC92
leafcutter	HDL	SL1344	12:123945800:123972529:clu_28825	rs11338826	704	5.68249e-09	0.00262445	1.36304e-07	0.0620167	0.935359	3.11479e-21	9.95e-07	rs7301953	rs12824567	0.997375	0.93782	HDL	CCDC92
leafcutter	HDL	IFNg_SL1344	12:123945800:123972529:clu_28825	rs3186071	717	1.55836e-08	0.00368758	3.73887e-07	0.0875652	0.908747	3.03018e-20	9.95e-07	rs11338826	rs12824567	0.996312	0.912111	HDL	CCDC92
leafcutter	HDL	IFNg_SL1344	12:123945800:123972529:clu_28825	rs4765335	721	1.55836e-08	0.00368758	3.73888e-07	0.0875655	0.908747	3.03018e-20	9.95e-07	rs11338826	rs12824567	0.996312	0.91211	HDL	CCDC92
leafcutter	HDL	IFNg_SL1344	12:123945800:123972529:clu_28825	rs11338826	704	1.55839e-08	0.00368766	3.73806e-07	0.0875461	0.908766	3.03018e-20	9.95e-07	rs11338826	rs12824567	0.996312	0.91213	HDL	CCDC92
leafcutter	HDL	naive	11:61793028:61795341:clu_23154	rs174548	806	1.66599e-06	3.77778e-06	0.0273917	0.0612016	0.911401	5.24538e-08	3.3e-10	rs174548	rs4246215	0.972603	0.937074	HDL	FADS2;FEN1;FADS1
leafcutter	HDL	naive	11:61828597:61837778:clu_23154	rs7943728	728	1.77589e-06	3.72518e-06	0.0291986	0.0603377	0.910458	6.70286e-08	3.3e-10	rs174559	rs4246215	0.970796	0.937847	HDL	FADS2;FEN1;FADS1
leafcutter	HDL	IFNg	11:61793028:61795341:clu_23154	rs174548	806	1.38885e-05	5.12003e-06	0.22835	0.0834937	0.688138	3.88385e-06	3.3e-10	rs174603	rs4246215	0.771631	0.891796	HDL	FADS2;FEN1;FADS1
leafcutter	HDL	IFNg	11:61828597:61837778:clu_23154	rs7943728	728	3.9783e-06	3.73451e-06	0.0654098	0.0605275	0.874055	6.97832e-07	3.3e-10	rs7943728	rs4246215	0.934582	0.935236	HDL	FADS2;FEN1;FADS1
leafcutter	HDL	SL1344	11:61793028:61795341:clu_23154	rs174548	806	3.72501e-05	4.20486e-06	0.612453	0.0688161	0.318689	0.000511373	3.3e-10	rs7942717	rs4246215	0.387506	0.822413	HDL	FADS2;FEN1;FADS1
leafcutter	HDL	SL1344	11:61828597:61837778:clu_23154	rs7943728	728	2.51858e-05	4.07718e-06	0.414096	0.0665162	0.519359	6.16491e-05	3.3e-10	rs174544	rs4246215	0.585875	0.886467	HDL	FADS2;FEN1;FADS1
leafcutter	HDL	IFNg_SL1344	11:61793028:61795341:clu_23154	rs174548	806	2.72998e-05	4.31979e-06	0.448853	0.0705439	0.480571	0.00017943	3.3e-10	rs174475	rs4246215	0.551115	0.871998	HDL	FADS2;FEN1;FADS1
leafcutter	HDL	IFNg_SL1344	11:61828597:61837778:clu_23154	rs7943728	728	3.18057e-05	4.09771e-06	0.522939	0.0669631	0.410062	0.000166571	3.3e-10	rs174475	rs4246215	0.477025	0.859624	HDL	FADS2;FEN1;FADS1
leafcutter	HDL	naive	17:78378808:78392476:clu_33642	rs4490057	1399	2.55332e-05	2.00468e-05	0.125433	0.0977041	0.776817	1.29277e-06	3.68e-10	rs4969141	rs75371359	0.874522	0.888277	HDL	PGS1
leafcutter	HDL	IFNg	17:78378808:78392476:clu_33642	rs4490057	1399	4.51006e-05	1.78128e-05	0.221559	0.0868145	0.691564	8.09835e-06	3.68e-10	rs55938653	rs75371359	0.778378	0.888468	HDL	PGS1
leafcutter	HDL	SL1344	17:78378808:78392476:clu_33642	rs4490057	1399	2.89279e-05	1.53798e-05	0.142109	0.0747708	0.783075	4.49974e-06	3.68e-10	rs7225449	rs75371359	0.857846	0.912839	HDL	PGS1
leafcutter	HDL	IFNg_SL1344	17:78378808:78392476:clu_33642	rs4490057	1399	0.000124655	2.17615e-05	0.612375	0.106624	0.280855	0.00118413	3.68e-10	rs7225449	rs75371359	0.387479	0.724827	HDL	PGS1
leafcutter	HGB	naive	11:61793028:61795341:clu_23154	rs174548	806	5.0508e-06	1.14531e-05	0.0206877	0.0459779	0.933318	5.24538e-08	1.04e-09	rs174548	rs28456	0.979296	0.95305	HGB	FADS2;FEN1;FADS1
leafcutter	HGB	naive	11:61828597:61837778:clu_23154	rs7943728	728	5.91528e-06	1.24081e-05	0.0242285	0.049897	0.925856	6.70286e-08	1.04e-09	rs174559	rs28456	0.975753	0.948863	HGB	FADS2;FEN1;FADS1
leafcutter	HGB	IFNg	11:61793028:61795341:clu_23154	rs174548	806	7.16798e-05	2.6425e-05	0.293595	0.107636	0.59867	3.88385e-06	1.04e-09	rs174603	rs28456	0.706307	0.847607	HGB	FADS2;FEN1;FADS1
leafcutter	HGB	IFNg	11:61828597:61837778:clu_23154	rs7943728	728	2.44727e-05	2.29731e-05	0.100239	0.0932896	0.806424	6.97832e-07	1.04e-09	rs7943728	rs28456	0.899714	0.896312	HGB	FADS2;FEN1;FADS1
leafcutter	HGB	SL1344	11:61793028:61795341:clu_23154	rs174548	806	0.000136984	1.5463e-05	0.561077	0.0629595	0.375811	0.000511373	1.04e-09	rs7942717	rs28456	0.438771	0.856509	HGB	FADS2;FEN1;FADS1
leafcutter	HGB	SL1344	11:61828597:61837778:clu_23154	rs7943728	728	8.6986e-05	1.40816e-05	0.356288	0.0570909	0.58652	6.16491e-05	1.04e-09	rs174544	rs28456	0.643611	0.911296	HGB	FADS2;FEN1;FADS1
leafcutter	HGB	IFNg_SL1344	11:61793028:61795341:clu_23154	rs174548	806	0.000130487	2.06477e-05	0.534466	0.0841902	0.381192	0.00017943	1.04e-09	rs174475	rs28456	0.465383	0.819095	HGB	FADS2;FEN1;FADS1
leafcutter	HGB	IFNg_SL1344	11:61828597:61837778:clu_23154	rs7943728	728	0.000139234	1.79382e-05	0.570291	0.0731173	0.356434	0.000166571	1.04e-09	rs174475	rs28456	0.429552	0.829782	HGB	FADS2;FEN1;FADS1
leafcutter	IL6	naive	1:154449980:154465134:clu_4923	rs61812598	942	6.78708e-25	6.5287e-22	1.75188e-05	0.0158678	0.984115	1.70429e-14	1.47e-25	rs11265613	rs12126142	0.999982	0.984132	IL6	IL6R
leafcutter	IL6	naive	1:154449980:154465134:clu_4923	rs10539207	949	6.78708e-25	6.5287e-22	1.75188e-05	0.0158678	0.984115	1.70429e-14	1.47e-25	rs11265613	rs12126142	0.999982	0.984132	IL6	IL6R
leafcutter	IL6	IFNg	1:154449980:154465134:clu_4923	rs61812598	942	4.11201e-27	5.67091e-22	1.06139e-07	0.0136514	0.986348	1.55693e-19	1.47e-25	rs11265613	rs12126142	1	0.986349	IL6	IL6R
leafcutter	IL6	IFNg	1:154449980:154465134:clu_4923	rs10539207	949	4.11201e-27	5.67091e-22	1.06139e-07	0.0136514	0.986348	1.55693e-19	1.47e-25	rs11265613	rs12126142	1	0.986349	IL6	IL6R
leafcutter	IL6	SL1344	1:154449980:154465134:clu_4923	rs61812598	942	4.29815e-21	1.74452e-21	0.110944	0.0441847	0.844871	3.7456e-06	1.47e-25	rs10539207	rs12126142	0.889056	0.950302	IL6	IL6R
leafcutter	IL6	SL1344	1:154449980:154465134:clu_4923	rs10539207	949	4.29805e-21	1.74537e-21	0.110941	0.0442067	0.844852	3.7456e-06	1.47e-25	rs10539207	rs12126142	0.889059	0.950277	IL6	IL6R
leafcutter	IL6	IFNg_SL1344	1:154449980:154465134:clu_4923	rs61812598	942	2.60139e-23	1.32227e-21	0.00067147	0.0331643	0.966164	3.30841e-11	1.47e-25	rs11265613	rs12126142	0.999329	0.966813	IL6	IL6R
leafcutter	IL6	IFNg_SL1344	1:154449980:154465134:clu_4923	rs10539207	949	2.60138e-23	1.32228e-21	0.00067147	0.0331646	0.966164	3.30841e-11	1.47e-25	rs11265613	rs12126142	0.999329	0.966813	IL6	IL6R
leafcutter	PCV	naive	11:61793028:61795341:clu_23154	rs174548	806	0.000246451	0.000558848	0.0170021	0.0376092	0.944583	5.24538e-08	7.79e-08	rs174548	rs28456	0.982193	0.961709	PCV	FADS2;FEN1;FADS1
leafcutter	PCV	naive	11:61828597:61837778:clu_23154	rs7943728	728	0.000295862	0.000620612	0.0204107	0.0418776	0.936795	6.70286e-08	7.79e-08	rs174559	rs28456	0.978673	0.95721	PCV	FADS2;FEN1;FADS1
leafcutter	PCV	IFNg	11:61793028:61795341:clu_23154	rs174548	806	0.0040744	0.00150204	0.281084	0.103012	0.610327	3.88385e-06	7.79e-08	rs174603	rs28456	0.713339	0.855591	PCV	FADS2;FEN1;FADS1
leafcutter	PCV	IFNg	11:61828597:61837778:clu_23154	rs7943728	728	0.00135021	0.00126747	0.0931473	0.0866217	0.817613	6.97832e-07	7.79e-08	rs7943728	rs28456	0.904235	0.904204	PCV	FADS2;FEN1;FADS1
leafcutter	PCV	SL1344	11:61793028:61795341:clu_23154	rs174548	806	0.00712231	0.000803979	0.491353	0.0550191	0.445701	0.000511373	7.79e-08	rs7942717	rs28456	0.50072	0.89012	PCV	FADS2;FEN1;FADS1
leafcutter	PCV	SL1344	11:61828597:61837778:clu_23154	rs7943728	728	0.00421556	0.000682432	0.29082	0.0464213	0.65786	6.16491e-05	7.79e-08	rs174544	rs28456	0.704282	0.934087	PCV	FADS2;FEN1;FADS1
leafcutter	PCV	IFNg_SL1344	11:61793028:61795341:clu_23154	rs174548	806	0.00740503	0.00117174	0.510858	0.0804356	0.40013	0.00017943	7.79e-08	rs174475	rs28456	0.480565	0.832623	PCV	FADS2;FEN1;FADS1
leafcutter	PCV	IFNg_SL1344	11:61828597:61837778:clu_23154	rs7943728	728	0.00767746	0.00098913	0.529648	0.0678436	0.393842	0.000166571	7.79e-08	rs174475	rs28456	0.461685	0.853052	PCV	FADS2;FEN1;FADS1
leafcutter	PLT	naive	1:112526111:112541951:clu_4437	rs12728001	693	5.09432e-11	0.00515996	9.38593e-10	0.0941679	0.900672	2.03774e-25	7.95e-07	rs351372	rs902289	0.99484	0.905344	PLT	ST7L;WNT2B
leafcutter	PLT	naive	1:112607597:112610841:clu_4440	rs3013431	754	0.000813848	0.00309118	0.0149973	0.056038	0.92506	7.80442e-09	7.95e-07	rs3013431	rs902289	0.981098	0.942882	PLT	ST7L
leafcutter	PLT	naive	1:112526111:112541951:clu_4437	rs6679414	720	5.09432e-11	0.00515996	9.386e-10	0.0941686	0.900671	2.03774e-25	7.95e-07	rs351372	rs902289	0.99484	0.905343	PLT	ST7L;WNT2B
leafcutter	PLT	naive	1:112526111:112541951:clu_4437	rs351368	690	5.09438e-11	0.00516001	9.38501e-10	0.0941586	0.900681	2.03774e-25	7.95e-07	rs351372	rs902289	0.99484	0.905353	PLT	ST7L;WNT2B
leafcutter	PLT	IFNg	1:112526111:112541951:clu_4437	rs12728001	693	2.56597e-10	0.00520114	4.72762e-09	0.0949274	0.899871	5.2898e-24	7.95e-07	rs351372	rs902289	0.994799	0.904576	PLT	ST7L;WNT2B
leafcutter	PLT	IFNg	1:112607597:112610841:clu_4440	rs3013431	754	0.0427316	0.00381513	0.78744	0.0702078	0.0958052	0.00213182	7.95e-07	rs11805708	rs902289	0.166013	0.577094	PLT	ST7L
leafcutter	PLT	IFNg	1:112526111:112541951:clu_4437	rs6679414	720	2.56597e-10	0.00520113	4.72765e-09	0.0949281	0.899871	5.2898e-24	7.95e-07	rs351372	rs902289	0.994799	0.904576	PLT	ST7L;WNT2B
leafcutter	PLT	IFNg	1:112526111:112541951:clu_4437	rs351368	690	2.566e-10	0.00520119	4.72716e-09	0.094918	0.899881	5.2898e-24	7.95e-07	rs351372	rs902289	0.994799	0.904586	PLT	ST7L;WNT2B
leafcutter	PLT	SL1344	1:112526111:112541951:clu_4437	rs12728001	693	0.000611115	0.00392506	0.0112594	0.0714037	0.912801	1.01047e-09	7.95e-07	rs6679414	rs902289	0.984204	0.92745	PLT	ST7L;WNT2B
leafcutter	PLT	SL1344	1:112607597:112610841:clu_4440	rs3013431	754	0.0361272	0.00321921	0.665737	0.0590865	0.23583	0.00306865	7.95e-07	rs2999158	rs902289	0.294917	0.79965	PLT	ST7L
leafcutter	PLT	SL1344	1:112526111:112541951:clu_4437	rs6679414	720	0.000611085	0.00392732	0.0112589	0.0714459	0.912757	1.01047e-09	7.95e-07	rs6679414	rs902289	0.984203	0.927407	PLT	ST7L;WNT2B
leafcutter	PLT	SL1344	1:112526111:112541951:clu_4437	rs351368	690	0.000611137	0.00392382	0.0112585	0.0713729	0.912834	1.01047e-09	7.95e-07	rs6679414	rs902289	0.984206	0.927482	PLT	ST7L;WNT2B
leafcutter	PLT	IFNg_SL1344	1:112526111:112541951:clu_4437	rs12728001	693	0.0020642	0.00293474	0.0380314	0.0531668	0.903803	1.64749e-07	7.95e-07	rs75939512	rs902289	0.95697	0.944443	PLT	ST7L;WNT2B
leafcutter	PLT	IFNg_SL1344	1:112607597:112610841:clu_4440	rs3013431	754	0.0434191	0.00322529	0.800109	0.0593404	0.0939062	0.036909	7.95e-07	rs3790605	rs902289	0.153247	0.612779	PLT	ST7L
leafcutter	PLT	IFNg_SL1344	1:112526111:112541951:clu_4437	rs6679414	720	0.00206399	0.0029396	0.0380279	0.0532568	0.903712	1.64749e-07	7.95e-07	rs75939512	rs902289	0.956969	0.944348	PLT	ST7L;WNT2B
leafcutter	PLT	IFNg_SL1344	1:112526111:112541951:clu_4437	rs351368	690	0.00206424	0.00293434	0.038028	0.0531535	0.90382	1.64749e-07	7.95e-07	rs75939512	rs902289	0.956973	0.944457	PLT	ST7L;WNT2B
leafcutter	TC	naive	5:75354697:75355365:clu_11759	rs3846662	788	6.33995e-17	1.70227e-14	6.30703e-05	0.0159504	0.983987	8.37046e-15	3.83e-18	rs3846662	rs12916	0.999937	0.984049	TC	HMGCR
leafcutter	TC	IFNg	5:75354697:75355365:clu_11759	rs3846662	788	1.97124e-14	4.54136e-14	0.01961	0.0442416	0.936148	1.58057e-09	3.83e-18	rs3846662	rs12916	0.98039	0.954873	TC	HMGCR
leafcutter	TC	SL1344	5:75354697:75355365:clu_11759	rs3846662	788	5.02607e-13	5.95759e-14	0.499998	0.0588254	0.441177	7.61137e-05	3.83e-18	rs3846662	rs12916	0.500002	0.88235	TC	HMGCR
leafcutter	TC	IFNg_SL1344	5:75354697:75355365:clu_11759	rs3846662	788	2.11244e-13	7.87796e-14	0.210147	0.0776584	0.712195	1.39781e-05	3.83e-18	rs4703667	rs12916	0.789853	0.90168	TC	HMGCR
leafcutter	TC	naive	11:61793028:61795341:clu_23154	rs174548	806	8.87387e-09	2.01223e-08	0.0209386	0.0465477	0.932514	5.24538e-08	2.71e-12	rs174548	rs174548	0.979061	0.952457	TC	FADS2;FEN1;FADS1
leafcutter	TC	naive	11:61828597:61837778:clu_23154	rs7943728	728	1.01667e-08	2.13261e-08	0.0239892	0.0493941	0.926617	6.70286e-08	2.71e-12	rs174559	rs174548	0.976011	0.949392	TC	FADS2;FEN1;FADS1
leafcutter	TC	IFNg	11:61793028:61795341:clu_23154	rs174548	806	1.12014e-07	4.12943e-08	0.264306	0.0967984	0.638895	3.88385e-06	2.71e-12	rs174603	rs174548	0.735694	0.868426	TC	FADS2;FEN1;FADS1
leafcutter	TC	IFNg	11:61828597:61837778:clu_23154	rs7943728	728	3.52561e-08	3.30956e-08	0.0831896	0.0772523	0.839558	6.97832e-07	2.71e-12	rs7943728	rs174548	0.91681	0.915738	TC	FADS2;FEN1;FADS1
leafcutter	TC	SL1344	11:61793028:61795341:clu_23154	rs174548	806	2.3948e-07	2.7033e-08	0.565073	0.063415	0.371512	0.000511373	2.71e-12	rs7942717	rs174548	0.434927	0.854194	TC	FADS2;FEN1;FADS1
leafcutter	TC	SL1344	11:61828597:61837778:clu_23154	rs7943728	728	1.52066e-07	2.46171e-08	0.358812	0.0575023	0.583685	6.16491e-05	2.71e-12	rs174544	rs174548	0.641188	0.910319	TC	FADS2;FEN1;FADS1
leafcutter	TC	IFNg_SL1344	11:61793028:61795341:clu_23154	rs174548	806	2.16075e-07	3.41906e-08	0.509846	0.0802657	0.409889	0.00017943	2.71e-12	rs174475	rs174548	0.490154	0.836244	TC	FADS2;FEN1;FADS1
leafcutter	TC	IFNg_SL1344	11:61828597:61837778:clu_23154	rs7943728	728	2.33032e-07	3.00227e-08	0.549857	0.0704614	0.379681	0.000166571	2.71e-12	rs174475	rs174548	0.450143	0.843469	TC	FADS2;FEN1;FADS1
leafcutter	TG	naive	11:61793028:61795341:clu_23154	rs174548	806	1.21003e-05	2.74384e-05	0.0226628	0.0504632	0.926834	5.24538e-08	1.66e-09	rs174548	rs174541	0.977298	0.948365	TG	FADS2;FEN1;FADS1
leafcutter	TG	naive	11:61828597:61837778:clu_23154	rs7943728	728	1.31687e-05	2.76232e-05	0.0246639	0.0508116	0.924484	6.70286e-08	1.66e-09	rs174559	rs174541	0.975295	0.947901	TG	FADS2;FEN1;FADS1
leafcutter	TG	IFNg	11:61793028:61795341:clu_23154	rs174548	806	0.000122076	4.50037e-05	0.228639	0.0836008	0.687593	3.88385e-06	1.66e-09	rs174603	rs174541	0.771194	0.891596	TG	FADS2;FEN1;FADS1
leafcutter	TG	IFNg	11:61828597:61837778:clu_23154	rs7943728	728	3.48491e-05	3.27136e-05	0.0652695	0.0603956	0.874267	6.97832e-07	1.66e-09	rs7943728	rs174541	0.934663	0.935382	TG	FADS2;FEN1;FADS1
leafcutter	TG	SL1344	11:61793028:61795341:clu_23154	rs174548	806	0.000304216	3.43405e-05	0.569773	0.063951	0.365938	0.000511373	1.66e-09	rs7942717	rs174541	0.429889	0.851238	TG	FADS2;FEN1;FADS1
leafcutter	TG	SL1344	11:61828597:61837778:clu_23154	rs7943728	728	0.000196199	3.17614e-05	0.367464	0.0589131	0.573395	6.16491e-05	1.66e-09	rs174544	rs174541	0.632308	0.906828	TG	FADS2;FEN1;FADS1
leafcutter	TG	IFNg_SL1344	11:61793028:61795341:clu_23154	rs174548	806	0.000231308	3.66011e-05	0.433221	0.0680524	0.498459	0.00017943	1.66e-09	rs174475	rs174541	0.566511	0.879874	TG	FADS2;FEN1;FADS1
leafcutter	TG	IFNg_SL1344	11:61828597:61837778:clu_23154	rs7943728	728	0.000271584	3.49896e-05	0.508654	0.0651068	0.425933	0.000166571	1.66e-09	rs174475	rs174541	0.491039	0.86741	TG	FADS2;FEN1;FADS1
leafcutter	TG	naive	19:44905923:44906602:clu_37428	rs440446	888	1.95441e-25	2.33549e-26	0.36633	0.0431853	0.590485	2.75547e-06	7.71e-31	rs440446	rs439401	0.63367	0.931849	TG	APOE
leafcutter	TG	naive	19:44905923:44906602:clu_37428	rs405509	885	1.95458e-25	2.33109e-26	0.366362	0.0431028	0.590535	2.75547e-06	7.71e-31	rs440446	rs439401	0.633638	0.931976	TG	APOE
leafcutter	TG	IFNg	19:44905923:44906602:clu_37428	rs440446	888	1.02153e-25	2.49565e-26	0.191474	0.0460154	0.762511	1.01931e-07	7.71e-31	rs440446	rs439401	0.808526	0.943087	TG	APOE
leafcutter	TG	IFNg	19:44905923:44906602:clu_37428	rs405509	885	1.02158e-25	2.49324e-26	0.191483	0.04597	0.762547	1.01931e-07	7.71e-31	rs440446	rs439401	0.808517	0.943143	TG	APOE
leafcutter	TG	SL1344	19:44905923:44906602:clu_37428	rs440446	888	3.15489e-25	1.58713e-25	0.591344	0.297375	0.111281	2.58109e-07	7.71e-31	rs405509	rs439401	0.408656	0.27231	TG	APOE
leafcutter	TG	SL1344	19:44905923:44906602:clu_37428	rs405509	885	3.15579e-25	1.58605e-25	0.591514	0.297173	0.111313	2.58109e-07	7.71e-31	rs405509	rs439401	0.408486	0.272501	TG	APOE
leafcutter	TG	IFNg_SL1344	19:44905923:44906602:clu_37428	rs440446	888	3.86665e-25	8.45459e-26	0.724755	0.158354	0.116892	2.15519e-07	7.71e-31	rs440446	rs439401	0.275245	0.424681	TG	APOE
leafcutter	TG	IFNg_SL1344	19:44905923:44906602:clu_37428	rs405509	885	3.86773e-25	8.44211e-26	0.724956	0.15812	0.116924	2.15519e-07	7.71e-31	rs440446	rs439401	0.275044	0.425111	TG	APOE
leafcutter	WBC	naive	2:113113114:113127689:clu_9895	rs7574159	1280	0.00130912	0.000194049	0.79701	0.118056	0.0834309	0.000650399	3.05e-08	rs13023005	rs1446509	0.201487	0.414076	WBC	IL1RN
leafcutter	WBC	naive	2:113113114:113127689:clu_9895	rs4251967	1234	0.00131296	0.00018981	0.799347	0.115475	0.0836756	0.000650399	3.05e-08	rs13023005	rs1446509	0.19915	0.420163	WBC	IL1RN
leafcutter	WBC	IFNg	2:113113114:113127689:clu_9895	rs7574159	1280	8.0213e-07	7.81541e-05	0.000488346	0.0466283	0.952804	7.29391e-12	3.05e-08	rs13424580	rs1446509	0.999433	0.953345	WBC	IL1RN
leafcutter	WBC	IFNg	2:113113114:113127689:clu_9895	rs4251967	1234	8.02132e-07	7.81501e-05	0.000488347	0.0466258	0.952807	7.29391e-12	3.05e-08	rs13424580	rs1446509	0.999433	0.953348	WBC	IL1RN
leafcutter	WBC	SL1344	2:113113114:113127689:clu_9895	rs7574159	1280	5.53285e-05	0.0011912	0.0336847	0.724979	0.24009	1.35476e-10	3.05e-08	rs4251967	rs1446509	0.965069	0.24878	WBC	IL1RN
leafcutter	WBC	SL1344	2:113113114:113127689:clu_9895	rs4251967	1234	5.53362e-05	0.00119114	0.0336893	0.724941	0.240123	1.35476e-10	3.05e-08	rs4251967	rs1446509	0.965064	0.248815	WBC	IL1RN
leafcutter	WBC	IFNg_SL1344	2:113113114:113127689:clu_9895	rs7574159	1280	0.00135696	0.000167712	0.826135	0.102035	0.0703056	0.00831523	3.05e-08	rs190452800	rs1446509	0.172341	0.407946	WBC	IL1RN
leafcutter	WBC	IFNg_SL1344	2:113113114:113127689:clu_9895	rs4251967	1234	0.00136139	0.000162913	0.828828	0.0991129	0.0705348	0.00831523	3.05e-08	rs190452800	rs1446509	0.169648	0.415772	WBC	IL1RN
leafcutter	LDL	naive	5:75354697:75355365:clu_11759	rs3846662	788	1.35183e-16	3.62965e-14	2.22831e-05	0.00498802	0.99499	8.37046e-15	9.47e-18	rs3846662	rs12916	0.999978	0.995012	LDL	HMGCR
leafcutter	LDL	IFNg	5:75354697:75355365:clu_11759	rs3846662	788	6.18162e-14	1.42413e-13	0.0101896	0.0225075	0.967303	1.58057e-09	9.47e-18	rs3846662	rs12916	0.98981	0.977261	LDL	HMGCR
leafcutter	LDL	SL1344	5:75354697:75355365:clu_11759	rs3846662	788	2.27657e-12	2.6985e-13	0.375262	0.0439003	0.580837	7.61137e-05	9.47e-18	rs3846662	rs12916	0.624738	0.92973	LDL	HMGCR
leafcutter	LDL	IFNg_SL1344	5:75354697:75355365:clu_11759	rs3846662	788	1.1071e-12	4.12875e-13	0.182492	0.0673068	0.750202	1.39781e-05	9.47e-18	rs4703667	rs12916	0.817508	0.917668	LDL	HMGCR
leafcutter	LDL	naive	11:61793028:61795341:clu_23154	rs174548	806	6.09435e-10	1.38195e-09	0.0223594	0.0497739	0.927867	5.24538e-08	1.27e-13	rs174548	rs174548	0.977641	0.949088	LDL	FADS2;FEN1;FADS1
leafcutter	LDL	naive	11:61828597:61837778:clu_23154	rs7943728	728	7.06211e-10	1.48138e-09	0.0259099	0.0534291	0.920661	6.70286e-08	1.27e-13	rs174559	rs174548	0.97409	0.94515	LDL	FADS2;FEN1;FADS1
leafcutter	LDL	IFNg	11:61793028:61795341:clu_23154	rs174548	806	8.20186e-09	3.02364e-09	0.300915	0.110345	0.58874	3.88385e-06	1.27e-13	rs174603	rs174548	0.699085	0.842158	LDL	FADS2;FEN1;FADS1
leafcutter	LDL	IFNg	11:61828597:61837778:clu_23154	rs7943728	728	2.77779e-09	2.60757e-09	0.101914	0.0948652	0.803221	6.97832e-07	1.27e-13	rs7943728	rs174548	0.898086	0.89437	LDL	FADS2;FEN1;FADS1
leafcutter	LDL	SL1344	11:61793028:61795341:clu_23154	rs174548	806	1.5838e-08	1.78783e-09	0.581077	0.0652393	0.353684	0.000511373	1.27e-13	rs7942717	rs174548	0.418923	0.844269	LDL	FADS2;FEN1;FADS1
leafcutter	LDL	SL1344	11:61828597:61837778:clu_23154	rs7943728	728	1.02376e-08	1.6573e-09	0.375603	0.06024	0.564157	6.16491e-05	1.27e-13	rs174544	rs174548	0.624397	0.903523	LDL	FADS2;FEN1;FADS1
leafcutter	LDL	IFNg_SL1344	11:61793028:61795341:clu_23154	rs174548	806	1.42375e-08	2.25287e-09	0.522354	0.0822595	0.395387	0.00017943	1.27e-13	rs174475	rs174548	0.477646	0.827782	LDL	FADS2;FEN1;FADS1
leafcutter	LDL	IFNg_SL1344	11:61828597:61837778:clu_23154	rs7943728	728	1.53553e-08	1.9783e-09	0.563364	0.0722169	0.364419	0.000166571	1.27e-13	rs174475	rs174548	0.436636	0.834606	LDL	FADS2;FEN1;FADS1
leafcutter	CAD_2017	naive	12:123945800:123972529:clu_28825	rs3186071	661	4.24316e-09	0.000928486	1.68038e-07	0.0358066	0.963265	1.42377e-19	1.84e-07	rs7301953	rs11057401	0.999071	0.96416	CAD	CCDC92
leafcutter	CAD_2017	naive	12:123945800:123972529:clu_28825	rs4765335	665	4.24316e-09	0.000928486	1.68039e-07	0.0358068	0.963265	1.42377e-19	1.84e-07	rs7301953	rs11057401	0.999071	0.96416	CAD	CCDC92
leafcutter	CAD_2017	naive	12:123945800:123972529:clu_28825	rs11338826	648	4.24318e-09	0.00092849	1.68021e-07	0.0358029	0.963268	1.42377e-19	1.84e-07	rs7301953	rs11057401	0.999071	0.964164	CAD	CCDC92
leafcutter	CAD_2017	IFNg	12:123945800:123972529:clu_28825	rs3186071	661	1.4754e-10	0.00105141	5.84287e-09	0.0406797	0.958269	2.57266e-23	1.84e-07	rs4765335	rs11057401	0.998949	0.959277	CAD	CCDC92
leafcutter	CAD_2017	IFNg	12:123945800:123972529:clu_28825	rs4765335	665	1.4754e-10	0.00105141	5.84291e-09	0.04068	0.958269	2.57266e-23	1.84e-07	rs4765335	rs11057401	0.998949	0.959277	CAD	CCDC92
leafcutter	CAD_2017	IFNg	12:123945800:123972529:clu_28825	rs11338826	648	1.47541e-10	0.00105142	5.84228e-09	0.0406755	0.958273	2.57266e-23	1.84e-07	rs4765335	rs11057401	0.998949	0.959282	CAD	CCDC92
leafcutter	CAD_2017	SL1344	12:123945800:123972529:clu_28825	rs3186071	661	8.14335e-10	0.000373967	3.22493e-08	0.013824	0.985802	3.11479e-21	1.84e-07	rs7301953	rs11057401	0.999626	0.986171	CAD	CCDC92
leafcutter	CAD_2017	SL1344	12:123945800:123972529:clu_28825	rs4765335	665	8.14335e-10	0.000373967	3.22495e-08	0.0138241	0.985802	3.11479e-21	1.84e-07	rs7301953	rs11057401	0.999626	0.986171	CAD	CCDC92
leafcutter	CAD_2017	SL1344	12:123945800:123972529:clu_28825	rs11338826	648	8.14336e-10	0.000373968	3.22459e-08	0.0138225	0.985804	3.11479e-21	1.84e-07	rs7301953	rs11057401	0.999626	0.986172	CAD	CCDC92
leafcutter	CAD_2017	IFNg_SL1344	12:123945800:123972529:clu_28825	rs3186071	661	2.8902e-09	0.000669673	1.14458e-07	0.0255466	0.973784	3.03018e-20	1.84e-07	rs11338826	rs11057401	0.99933	0.974436	CAD	CCDC92
leafcutter	CAD_2017	IFNg_SL1344	12:123945800:123972529:clu_28825	rs4765335	665	2.8902e-09	0.000669673	1.14458e-07	0.0255467	0.973783	3.03018e-20	1.84e-07	rs11338826	rs11057401	0.99933	0.974436	CAD	CCDC92
leafcutter	CAD_2017	IFNg_SL1344	12:123945800:123972529:clu_28825	rs11338826	648	2.89021e-09	0.000669674	1.14446e-07	0.0255438	0.973786	3.03018e-20	1.84e-07	rs11338826	rs11057401	0.99933	0.974439	CAD	CCDC92
leafcutter	CAD_2017	naive	15:90884639:90885037:clu_30155	rs1894400	993	2.29494e-16	2.71733e-09	9.75014e-10	0.0105552	0.989445	1.1702e-24	6.279e-13	rs1894400	rs11330240	1	0.989445	CAD	FES
leafcutter	CAD_2017	IFNg	15:90884639:90885037:clu_30155	rs1894400	993	5.41851e-15	2.83345e-09	2.30207e-08	0.011049	0.988951	9.82251e-22	6.279e-13	rs1894400	rs11330240	1	0.988951	CAD	FES
leafcutter	CAD_2017	SL1344	15:90884639:90885037:clu_30155	rs1894400	993	1.5712e-07	1.6459e-08	0.667527	0.0696637	0.262809	0.00329291	6.279e-13	rs145583381	rs11330240	0.332472	0.790468	CAD	FES
leafcutter	CAD_2017	IFNg_SL1344	15:90884639:90885037:clu_30155	rs1894400	993	1.32056e-07	1.4607e-08	0.561045	0.0616812	0.377273	0.000206982	6.279e-13	rs11635900	rs11330240	0.438955	0.859482	CAD	FES
leafcutter	CAD_2017	naive	10:89247649:89251707:clu_25395	rs1332328	872	1.1861e-20	1.9126e-14	3.76361e-09	0.00507395	0.994926	1.29416e-22	5.09e-16	rs1332329	rs2246942	1	0.994926	CAD	LIPA
leafcutter	CAD_2017	naive	10:89247649:89251707:clu_25395	rs2250644	872	1.1861e-20	1.9126e-14	3.76361e-09	0.00507395	0.994926	1.29416e-22	5.09e-16	rs1332329	rs2246942	1	0.994926	CAD	LIPA
leafcutter	CAD_2017	IFNg	10:89247649:89251707:clu_25395	rs1332328	872	1.54133e-23	1.66286e-14	4.89078e-12	0.0042807	0.995719	6.41937e-29	5.09e-16	rs1332329	rs2246942	1	0.995719	CAD	LIPA
leafcutter	CAD_2017	IFNg	10:89247649:89251707:clu_25395	rs2250644	872	1.54133e-23	1.66286e-14	4.89078e-12	0.0042807	0.995719	6.41937e-29	5.09e-16	rs1332329	rs2246942	1	0.995719	CAD	LIPA
leafcutter	CAD_2017	SL1344	10:89247649:89251707:clu_25395	rs1332328	872	1.04394e-20	3.10389e-14	3.31253e-09	0.00885779	0.991142	2.64262e-23	5.09e-16	rs2246833	rs2246942	1	0.991142	CAD	LIPA
leafcutter	CAD_2017	SL1344	10:89247649:89251707:clu_25395	rs2250644	872	1.04394e-20	3.10389e-14	3.31253e-09	0.00885779	0.991142	2.64262e-23	5.09e-16	rs2246833	rs2246942	1	0.991142	CAD	LIPA
leafcutter	CAD_2017	IFNg_SL1344	10:89247649:89251707:clu_25395	rs1332328	872	1.65531e-21	1.76707e-14	5.25246e-10	0.00461168	0.995388	1.74612e-24	5.09e-16	rs1332329	rs2246942	1	0.995388	CAD	LIPA
leafcutter	CAD_2017	IFNg_SL1344	10:89247649:89251707:clu_25395	rs2250644	872	1.65531e-21	1.76707e-14	5.25246e-10	0.00461168	0.995388	1.74612e-24	5.09e-16	rs1332329	rs2246942	1	0.995388	CAD	LIPA
leafcutter	CAD_2017	naive	7:140026348:140028613:clu_15923	rs2286198	703	0.000301993	0.00168902	0.00335038	0.0177615	0.976897	1.16735e-12	4.881e-07	rs2286198	rs2286198	0.994659	0.982143	CAD	PARP12
leafcutter	CAD_2017	naive	7:140026348:140028613:clu_15923	rs2286196	704	0.000301993	0.00168904	0.00335037	0.0177617	0.976897	1.16735e-12	4.881e-07	rs2286198	rs2286198	0.994659	0.982143	CAD	PARP12
leafcutter	CAD_2017	IFNg	7:140026348:140028613:clu_15923	rs2286198	703	1.72435e-05	0.00165461	0.000191304	0.0173758	0.980761	3.02343e-16	4.881e-07	rs2286198	rs2286198	0.998137	0.982592	CAD	PARP12
leafcutter	CAD_2017	IFNg	7:140026348:140028613:clu_15923	rs2286196	704	1.72435e-05	0.00165461	0.000191303	0.0173758	0.980761	3.02343e-16	4.881e-07	rs2286198	rs2286198	0.998137	0.982592	CAD	PARP12
leafcutter	CAD_2017	SL1344	7:140026348:140028613:clu_15923	rs2286198	703	2.37077e-05	0.0018557	0.000263019	0.0196093	0.978248	5.65068e-16	4.881e-07	rs757835	rs2286198	0.997858	0.980349	CAD	PARP12
leafcutter	CAD_2017	SL1344	7:140026348:140028613:clu_15923	rs2286196	704	2.37077e-05	0.0018557	0.000263019	0.0196093	0.978248	5.65068e-16	4.881e-07	rs757835	rs2286198	0.997858	0.980349	CAD	PARP12
leafcutter	CAD_2017	IFNg_SL1344	7:140026348:140028613:clu_15923	rs2286198	703	1.59448e-05	0.00165323	0.000176896	0.0173606	0.980793	1.19222e-16	4.881e-07	rs2286198	rs2286198	0.998154	0.982607	CAD	PARP12
leafcutter	CAD_2017	IFNg_SL1344	7:140026348:140028613:clu_15923	rs2286196	704	1.59448e-05	0.00165324	0.000176896	0.0173606	0.980793	1.19222e-16	4.881e-07	rs2286198	rs2286198	0.998154	0.982607	CAD	PARP12
featureCounts	AD	naive	ENSG00000120899	rs6987305	768	5.62083e-07	1.49146e-05	0.000373177	0.00891136	0.9907	1.46552e-11	3.273e-09	rs6987305	rs28834970	0.999611	0.991085	AD	PTK2B
featureCounts	AD	naive	ENSG00000120899	rs28834970	768	5.62083e-07	1.49147e-05	0.00037316	0.008911	0.9907	1.46552e-11	3.273e-09	rs6987305	rs28834970	0.999611	0.991086	AD	PTK2B
featureCounts	AD	IFNg	ENSG00000120899	rs6987305	768	6.22267e-05	1.9667e-05	0.0413135	0.0121108	0.946494	2.799e-07	3.273e-09	rs28834970	rs28834970	0.958605	0.987366	AD	PTK2B
featureCounts	AD	IFNg	ENSG00000120899	rs28834970	768	6.22253e-05	1.97046e-05	0.0413106	0.0121352	0.946472	2.799e-07	3.273e-09	rs28834970	rs28834970	0.958608	0.987341	AD	PTK2B
featureCounts	AD	SL1344	ENSG00000120899	rs6987305	768	0.0011729	9.30026e-05	0.778712	0.0615877	0.158434	0.0120004	3.273e-09	rs1316370	rs28834970	0.220022	0.720083	AD	PTK2B
featureCounts	AD	SL1344	ENSG00000120899	rs28834970	768	0.0011737	9.21147e-05	0.779201	0.0609952	0.158538	0.0120004	3.273e-09	rs1316370	rs28834970	0.219533	0.722159	AD	PTK2B
featureCounts	AD	IFNg_SL1344	ENSG00000120899	rs6987305	768	0.00127994	0.000104562	0.849778	0.0693413	0.079496	0.00502553	3.273e-09	rs1345134	rs28834970	0.148837	0.534113	AD	PTK2B
featureCounts	AD	IFNg_SL1344	ENSG00000120899	rs28834970	768	0.00128056	0.000103963	0.850146	0.0689403	0.0795289	0.00502553	3.273e-09	rs1345134	rs28834970	0.148469	0.53566	AD	PTK2B
featureCounts	CEL	naive	ENSG00000111321	rs10849448	82	1.05831e-05	0.000832722	0.000114518	0.00801977	0.991022	8.44375e-15	5.765e-07	rs10849448	rs10774430	0.999042	0.991973	CEL	LTBR
featureCounts	CEL	naive	ENSG00000111321	rs12354	82	1.05831e-05	0.000832722	0.000114518	0.00801977	0.991022	8.44375e-15	5.765e-07	rs10849448	rs10774430	0.999042	0.991973	CEL	LTBR
featureCounts	CEL	naive	ENSG00000111321	rs2364480	82	1.05831e-05	0.000832722	0.000114518	0.00801977	0.991022	8.44375e-15	5.765e-07	rs10849448	rs10774430	0.999042	0.991973	CEL	LTBR
featureCounts	CEL	naive	ENSG00000111321	rs5796234	82	1.05831e-05	0.000832722	0.000114518	0.00801977	0.991022	8.44375e-15	5.765e-07	rs10849448	rs10774430	0.999042	0.991973	CEL	LTBR
featureCounts	CEL	IFNg	ENSG00000111321	rs10849448	82	0.000189031	0.000945443	0.00204549	0.00924296	0.987577	2.21554e-11	5.765e-07	rs12354	rs10774430	0.99682	0.990728	CEL	LTBR
featureCounts	CEL	IFNg	ENSG00000111321	rs12354	82	0.000189031	0.000945443	0.00204549	0.00924296	0.987577	2.21554e-11	5.765e-07	rs12354	rs10774430	0.99682	0.990728	CEL	LTBR
featureCounts	CEL	IFNg	ENSG00000111321	rs2364480	82	0.000189031	0.000945443	0.00204549	0.00924296	0.987577	2.21554e-11	5.765e-07	rs12354	rs10774430	0.99682	0.990728	CEL	LTBR
featureCounts	CEL	IFNg	ENSG00000111321	rs5796234	82	0.000189031	0.000945443	0.00204549	0.00924296	0.987577	2.21554e-11	5.765e-07	rs12354	rs10774430	0.99682	0.990728	CEL	LTBR
featureCounts	CEL	SL1344	ENSG00000111321	rs10849448	82	7.26256e-06	0.000820482	7.85873e-05	0.00788714	0.991207	1.12775e-14	5.765e-07	rs2364480	rs10774430	0.999094	0.992106	CEL	LTBR
featureCounts	CEL	SL1344	ENSG00000111321	rs12354	82	7.26256e-06	0.000820482	7.85873e-05	0.00788714	0.991207	1.12775e-14	5.765e-07	rs2364480	rs10774430	0.999094	0.992106	CEL	LTBR
featureCounts	CEL	SL1344	ENSG00000111321	rs2364480	82	7.26256e-06	0.000820482	7.85873e-05	0.00788714	0.991207	1.12775e-14	5.765e-07	rs2364480	rs10774430	0.999094	0.992106	CEL	LTBR
featureCounts	CEL	SL1344	ENSG00000111321	rs5796234	82	7.26256e-06	0.000820482	7.85873e-05	0.00788714	0.991207	1.12775e-14	5.765e-07	rs2364480	rs10774430	0.999094	0.992106	CEL	LTBR
featureCounts	CEL	IFNg_SL1344	ENSG00000111321	rs10849448	82	0.0235828	0.000911146	0.255186	0.00914824	0.711171	1.15173e-05	5.765e-07	rs5796234	rs10774430	0.72032	0.9873	CEL	LTBR
featureCounts	CEL	IFNg_SL1344	ENSG00000111321	rs12354	82	0.0235828	0.000911146	0.255186	0.00914824	0.711171	1.15173e-05	5.765e-07	rs5796234	rs10774430	0.72032	0.9873	CEL	LTBR
featureCounts	CEL	IFNg_SL1344	ENSG00000111321	rs2364480	82	0.0235828	0.000911146	0.255186	0.00914824	0.711171	1.15173e-05	5.765e-07	rs5796234	rs10774430	0.72032	0.9873	CEL	LTBR
featureCounts	CEL	IFNg_SL1344	ENSG00000111321	rs5796234	82	0.0235828	0.000911146	0.255186	0.00914824	0.711171	1.15173e-05	5.765e-07	rs5796234	rs10774430	0.72032	0.9873	CEL	LTBR
featureCounts	CEL	naive	ENSG00000103811	rs4779154	217	0.0228437	0.0199373	0.0989695	0.0856051	0.772644	2.28105e-09	6.503e-07	rs4779154	rs34593439	0.85825	0.900256	CEL	CTSH
featureCounts	CEL	naive	ENSG00000103811	rs35514372	216	0.0228439	0.0199359	0.09897	0.0855989	0.772651	2.28105e-09	6.503e-07	rs4779154	rs34593439	0.85825	0.900263	CEL	CTSH
featureCounts	CEL	naive	ENSG00000103811	rs200464343	217	0.0228437	0.0199373	0.0989695	0.0856051	0.772644	2.28105e-09	6.503e-07	rs4779154	rs34593439	0.85825	0.900256	CEL	CTSH
featureCounts	CEL	IFNg	ENSG00000103811	rs4779154	217	0.046464	0.00935099	0.201304	0.0398098	0.703071	5.70092e-08	6.503e-07	rs35514372	rs34593439	0.742881	0.946412	CEL	CTSH
featureCounts	CEL	IFNg	ENSG00000103811	rs35514372	216	0.0464649	0.0093477	0.201307	0.0397954	0.703085	5.70092e-08	6.503e-07	rs35514372	rs34593439	0.74288	0.946431	CEL	CTSH
featureCounts	CEL	IFNg	ENSG00000103811	rs200464343	217	0.046464	0.00935099	0.201304	0.0398098	0.703071	5.70092e-08	6.503e-07	rs35514372	rs34593439	0.742881	0.946412	CEL	CTSH
featureCounts	CEL	SL1344	ENSG00000103811	rs4779154	217	0.00333701	0.0508563	0.0144575	0.219622	0.711727	1.20497e-11	6.503e-07	rs4779154	rs34593439	0.931349	0.76419	CEL	CTSH
featureCounts	CEL	SL1344	ENSG00000103811	rs35514372	216	0.00333701	0.0508562	0.0144575	0.219621	0.711729	1.20497e-11	6.503e-07	rs4779154	rs34593439	0.931349	0.764191	CEL	CTSH
featureCounts	CEL	SL1344	ENSG00000103811	rs200464343	217	0.00333701	0.0508563	0.0144575	0.219622	0.711727	1.20497e-11	6.503e-07	rs4779154	rs34593439	0.931349	0.76419	CEL	CTSH
featureCounts	CEL	IFNg_SL1344	ENSG00000103811	rs4779154	217	0.00504087	0.00387871	0.0218394	0.015851	0.95339	2.52597e-11	6.503e-07	rs200464343	rs34593439	0.969241	0.983646	CEL	CTSH
featureCounts	CEL	IFNg_SL1344	ENSG00000103811	rs35514372	216	0.00504088	0.00387838	0.0218394	0.0158495	0.953392	2.52597e-11	6.503e-07	rs200464343	rs34593439	0.969241	0.983648	CEL	CTSH
featureCounts	CEL	IFNg_SL1344	ENSG00000103811	rs200464343	217	0.00504087	0.00387871	0.0218394	0.015851	0.95339	2.52597e-11	6.503e-07	rs200464343	rs34593439	0.969241	0.983646	CEL	CTSH
featureCounts	CD	naive	ENSG00000085978	rs34701569	877	5.59129e-33	7.38758e-34	0.544756	0.0715931	0.383651	0.00050959	1.86e-38	rs6745825	rs12692254	0.455244	0.842737	IBD	ATG16L1
featureCounts	CD	IFNg	ENSG00000085978	rs34701569	877	6.50479e-34	6.90059e-34	0.0633758	0.0663618	0.870262	3.151e-06	1.86e-38	rs34701569	rs12692254	0.936624	0.929148	IBD	ATG16L1
featureCounts	CD	SL1344	ENSG00000085978	rs34701569	877	7.9038e-33	8.03089e-34	0.770062	0.0780926	0.151845	0.00147602	1.86e-38	rs6754677	rs12692254	0.229938	0.660376	IBD	ATG16L1
featureCounts	CD	IFNg_SL1344	ENSG00000085978	rs34701569	877	7.69429e-33	7.49878e-34	0.74965	0.0728827	0.177467	0.00292664	1.86e-38	rs13005285	rs12692254	0.25035	0.708877	IBD	ATG16L1
featureCounts	CD	naive	ENSG00000134824	rs968567	803	0.000319885	0.0014724	0.0167716	0.0762929	0.905143	3.01509e-10	6.768e-07	rs61896141	rs174567	0.981436	0.922264	IBD	FADS2
featureCounts	CD	naive	ENSG00000134824	rs192793035	801	0.00031989	0.00147213	0.0167718	0.0762783	0.905158	3.01509e-10	6.768e-07	rs61896141	rs174567	0.981436	0.922279	IBD	FADS2
featureCounts	CD	IFNg	ENSG00000134824	rs968567	803	0.000147929	0.00144023	0.00775592	0.074595	0.916061	1.90289e-11	6.768e-07	rs61896141	rs174567	0.990656	0.924701	IBD	FADS2
featureCounts	CD	IFNg	ENSG00000134824	rs192793035	801	0.000147929	0.00144019	0.00775594	0.0745932	0.916063	1.90289e-11	6.768e-07	rs61896141	rs174567	0.990656	0.924703	IBD	FADS2
featureCounts	CD	SL1344	ENSG00000134824	rs968567	803	0.00215919	0.00138783	0.113206	0.0719526	0.811294	7.17998e-08	6.768e-07	rs192793035	rs174567	0.883247	0.918536	IBD	FADS2
featureCounts	CD	SL1344	ENSG00000134824	rs192793035	801	0.00215929	0.00138702	0.113212	0.07191	0.811332	7.17998e-08	6.768e-07	rs192793035	rs174567	0.883242	0.918584	IBD	FADS2
featureCounts	CD	IFNg_SL1344	ENSG00000134824	rs968567	803	0.00104169	0.00138151	0.0546158	0.0715614	0.8714	9.73493e-08	6.768e-07	rs192793035	rs174567	0.942961	0.92411	IBD	FADS2
featureCounts	CD	IFNg_SL1344	ENSG00000134824	rs192793035	801	0.00104171	0.00138122	0.0546167	0.0715457	0.871415	9.73493e-08	6.768e-07	rs192793035	rs174567	0.94296	0.924126	IBD	FADS2
featureCounts	CD	naive	ENSG00000165689	rs11145930	765	9.12149e-15	1.64502e-15	0.767317	0.138287	0.0943958	4.6313e-06	4.37e-20	rs11145930	rs4077515	0.232683	0.405684	IBD	SDCCAG3
featureCounts	CD	naive	ENSG00000165689	rs73566945	788	9.09883e-15	1.67046e-15	0.765411	0.140428	0.0941613	4.6313e-06	4.37e-20	rs11145930	rs4077515	0.234589	0.401388	IBD	SDCCAG3
featureCounts	CD	IFNg	ENSG00000165689	rs11145930	765	1.02751e-14	8.70919e-16	0.864357	0.0732009	0.0624424	0.00200578	4.37e-20	rs10870079	rs4077515	0.135643	0.460343	IBD	SDCCAG3
featureCounts	CD	IFNg	ENSG00000165689	rs73566945	788	1.0267e-14	8.7959e-16	0.863676	0.0739304	0.0623933	0.00200578	4.37e-20	rs10870079	rs4077515	0.136324	0.457685	IBD	SDCCAG3
featureCounts	CD	SL1344	ENSG00000165689	rs11145930	765	5.07193e-16	8.05208e-15	0.042666	0.677076	0.280258	9.56027e-12	4.37e-20	rs11145930	rs4077515	0.957334	0.292749	IBD	SDCCAG3
featureCounts	CD	SL1344	ENSG00000165689	rs73566945	788	5.07027e-16	8.05333e-15	0.0426521	0.677181	0.280167	9.56027e-12	4.37e-20	rs11145930	rs4077515	0.957348	0.292649	IBD	SDCCAG3
featureCounts	CD	IFNg_SL1344	ENSG00000165689	rs11145930	765	1.98305e-16	9.16641e-16	0.0166818	0.0762024	0.907116	1.92619e-09	4.37e-20	rs73566945	rs4077515	0.983318	0.922505	IBD	SDCCAG3
featureCounts	CD	IFNg_SL1344	ENSG00000165689	rs73566945	788	1.98295e-16	9.17184e-16	0.016681	0.0762482	0.907071	1.92619e-09	4.37e-20	rs73566945	rs4077515	0.983319	0.922458	IBD	SDCCAG3
featureCounts	CD	naive	ENSG00000168610	rs35455295	537	0.000175223	0.000105203	0.120676	0.0716457	0.807398	1.80868e-06	2.923e-08	rs35455295	rs744166	0.879044	0.918496	IBD	STAT3
featureCounts	CD	IFNg	ENSG00000168610	rs35455295	537	0.00124585	6.48299e-05	0.858018	0.0445522	0.0961195	0.0354644	2.923e-08	rs9913963	rs744166	0.140672	0.683289	IBD	STAT3
featureCounts	CD	SL1344	ENSG00000168610	rs35455295	537	0.00127329	6.06565e-05	0.876912	0.041694	0.0800599	0.0175662	2.923e-08	rs5016637	rs744166	0.121754	0.657555	IBD	STAT3
featureCounts	CD	IFNg_SL1344	ENSG00000168610	rs35455295	537	0.00109294	7.72251e-05	0.752705	0.0529917	0.193133	0.000262065	2.923e-08	rs62076937	rs744166	0.246125	0.784696	IBD	STAT3
featureCounts	IBD	naive	ENSG00000197165	rs11339073	350	2.84564e-09	1.3584e-06	0.000184879	0.087342	0.912472	5.31321e-13	2.783e-10	rs11339073	rs12446550	0.999814	0.912642	IBD	SULT1A2
featureCounts	IBD	naive	ENSG00000197165	rs151174	367	2.90591e-09	1.27099e-06	0.000196434	0.0850019	0.9148	5.31321e-13	2.783e-10	rs11339073	rs12446550	0.999802	0.914981	IBD	SULT1A2
featureCounts	IBD	naive	ENSG00000197165	rs3859172	339	2.91898e-09	1.29984e-06	0.000187274	0.0824769	0.917335	5.31321e-13	2.783e-10	rs11339073	rs12446550	0.999811	0.917508	IBD	SULT1A2
featureCounts	IBD	naive	ENSG00000197165	rs140001625	339	2.91898e-09	1.29984e-06	0.000187274	0.0824769	0.917335	5.31321e-13	2.783e-10	rs11339073	rs12446550	0.999811	0.917508	IBD	SULT1A2
featureCounts	IBD	IFNg	ENSG00000197165	rs11339073	350	4.07458e-10	1.06912e-06	2.64722e-05	0.0685288	0.931444	1.85305e-15	2.783e-10	rs149271	rs12446550	0.999972	0.931469	IBD	SULT1A2
featureCounts	IBD	IFNg	ENSG00000197165	rs151174	367	4.06324e-10	1.05466e-06	2.74667e-05	0.0703631	0.929608	1.85305e-15	2.783e-10	rs149271	rs12446550	0.999971	0.929635	IBD	SULT1A2
featureCounts	IBD	IFNg	ENSG00000197165	rs3859172	339	4.08579e-10	1.06497e-06	2.62134e-05	0.0673929	0.93258	1.85305e-15	2.783e-10	rs149271	rs12446550	0.999973	0.932605	IBD	SULT1A2
featureCounts	IBD	IFNg	ENSG00000197165	rs140001625	339	4.08579e-10	1.06497e-06	2.62134e-05	0.0673929	0.93258	1.85305e-15	2.783e-10	rs149271	rs12446550	0.999973	0.932605	IBD	SULT1A2
featureCounts	IBD	SL1344	ENSG00000197165	rs11339073	350	3.84279e-09	1.19266e-06	0.000249663	0.0765633	0.923186	7.17634e-12	2.783e-10	rs34835	rs12446550	0.999749	0.923418	IBD	SULT1A2
featureCounts	IBD	SL1344	ENSG00000197165	rs151174	367	3.83562e-09	1.16687e-06	0.000259281	0.0779566	0.921783	7.17634e-12	2.783e-10	rs34835	rs12446550	0.99974	0.922023	IBD	SULT1A2
featureCounts	IBD	SL1344	ENSG00000197165	rs3859172	339	3.87491e-09	1.17891e-06	0.000248604	0.0747105	0.92504	7.17634e-12	2.783e-10	rs34835	rs12446550	0.99975	0.925271	IBD	SULT1A2
featureCounts	IBD	SL1344	ENSG00000197165	rs140001625	339	3.87491e-09	1.17891e-06	0.000248604	0.0747105	0.92504	7.17634e-12	2.783e-10	rs34835	rs12446550	0.99975	0.925271	IBD	SULT1A2
featureCounts	IBD	IFNg_SL1344	ENSG00000197165	rs11339073	350	5.49568e-08	2.26925e-06	0.0035705	0.146581	0.849846	7.39795e-10	2.783e-10	rs140001625	rs12446550	0.996427	0.852893	IBD	SULT1A2
featureCounts	IBD	IFNg_SL1344	ENSG00000197165	rs151174	367	5.47596e-08	2.24518e-06	0.00370164	0.150925	0.845371	7.39795e-10	2.783e-10	rs140001625	rs12446550	0.996296	0.848514	IBD	SULT1A2
featureCounts	IBD	IFNg_SL1344	ENSG00000197165	rs3859172	339	5.52892e-08	2.26742e-06	0.00354721	0.14462	0.85183	7.39795e-10	2.783e-10	rs140001625	rs12446550	0.99645	0.854865	IBD	SULT1A2
featureCounts	IBD	IFNg_SL1344	ENSG00000197165	rs140001625	339	5.52892e-08	2.26742e-06	0.00354721	0.14462	0.85183	7.39795e-10	2.783e-10	rs140001625	rs12446550	0.99645	0.854865	IBD	SULT1A2
featureCounts	IBD	naive	ENSG00000175643	rs243314	1668	0.000109661	0.00129976	0.00485387	0.0565938	0.937143	2.25026e-10	2.669e-07	rs243314	rs12598132	0.993737	0.943049	IBD	RMI2
featureCounts	IBD	naive	ENSG00000175643	rs7190769	1742	0.000109657	0.00130048	0.00485391	0.0566279	0.937108	2.25026e-10	2.669e-07	rs243314	rs12598132	0.993736	0.943015	IBD	RMI2
featureCounts	IBD	naive	ENSG00000175643	rs11864235	1730	0.000109658	0.00130018	0.00485427	0.0566185	0.937117	2.25026e-10	2.669e-07	rs243314	rs12598132	0.993736	0.943025	IBD	RMI2
featureCounts	IBD	naive	ENSG00000175643	rs10163410	1726	0.000109658	0.00130014	0.00485398	0.056613	0.937123	2.25026e-10	2.669e-07	rs243314	rs12598132	0.993736	0.94303	IBD	RMI2
featureCounts	IBD	IFNg	ENSG00000175643	rs243314	1668	0.0137543	0.0066145	0.608802	0.292697	0.0781324	5.97632e-07	2.669e-07	rs7190769	rs12598132	0.370829	0.210697	IBD	RMI2
featureCounts	IBD	IFNg	ENSG00000175643	rs7190769	1742	0.013759	0.00660838	0.609037	0.292439	0.0781564	5.97632e-07	2.669e-07	rs7190769	rs12598132	0.370596	0.210894	IBD	RMI2
featureCounts	IBD	IFNg	ENSG00000175643	rs11864235	1730	0.013728	0.00664182	0.607704	0.293939	0.0779878	5.97632e-07	2.669e-07	rs7190769	rs12598132	0.371926	0.209686	IBD	RMI2
featureCounts	IBD	IFNg	ENSG00000175643	rs10163410	1726	0.0137696	0.00659645	0.609506	0.291911	0.078217	5.97632e-07	2.669e-07	rs7190769	rs12598132	0.370128	0.211325	IBD	RMI2
featureCounts	IBD	SL1344	ENSG00000175643	rs243314	1668	0.00437763	0.00439515	0.193765	0.193937	0.603525	4.94672e-09	2.669e-07	rs11864235	rs12598132	0.797462	0.756807	IBD	RMI2
featureCounts	IBD	SL1344	ENSG00000175643	rs7190769	1742	0.00436937	0.00442811	0.193408	0.195406	0.602388	4.94672e-09	2.669e-07	rs11864235	rs12598132	0.797794	0.755067	IBD	RMI2
featureCounts	IBD	SL1344	ENSG00000175643	rs11864235	1730	0.00437027	0.00442391	0.193461	0.195233	0.602513	4.94672e-09	2.669e-07	rs11864235	rs12598132	0.797745	0.75527	IBD	RMI2
featureCounts	IBD	SL1344	ENSG00000175643	rs10163410	1726	0.00437105	0.00442135	0.193482	0.195106	0.602619	4.94672e-09	2.669e-07	rs11864235	rs12598132	0.797725	0.755422	IBD	RMI2
featureCounts	IBD	IFNg_SL1344	ENSG00000175643	rs243314	1668	0.00513479	0.0040244	0.227279	0.177544	0.586017	3.66809e-08	2.669e-07	rs10163410	rs12598132	0.763562	0.767479	IBD	RMI2
featureCounts	IBD	IFNg_SL1344	ENSG00000175643	rs7190769	1742	0.00512823	0.00404703	0.226999	0.178555	0.585271	3.66809e-08	2.669e-07	rs10163410	rs12598132	0.763825	0.766236	IBD	RMI2
featureCounts	IBD	IFNg_SL1344	ENSG00000175643	rs11864235	1730	0.00512851	0.00404546	0.227026	0.178497	0.585303	3.66809e-08	2.669e-07	rs10163410	rs12598132	0.7638	0.766304	IBD	RMI2
featureCounts	IBD	IFNg_SL1344	ENSG00000175643	rs10163410	1726	0.00512965	0.00404206	0.227062	0.178335	0.585432	3.66809e-08	2.669e-07	rs10163410	rs12598132	0.763767	0.766507	IBD	RMI2
featureCounts	IBD	naive	ENSG00000178952	rs56226746	299	1.48071e-07	3.19328e-06	0.00465265	0.0994429	0.895901	1.34266e-09	3.858e-10	rs56226746	rs147684209	0.995344	0.900092	IBD	TUFM
featureCounts	IBD	IFNg	ENSG00000178952	rs56226746	299	1.0715e-10	3.80635e-06	3.36686e-06	0.118721	0.881271	4.29125e-17	3.858e-10	rs12928404	rs147684209	0.999993	0.881278	IBD	TUFM
featureCounts	IBD	SL1344	ENSG00000178952	rs56226746	299	4.76944e-06	2.94577e-06	0.149865	0.0918032	0.758324	4.57304e-06	3.858e-10	rs56226746	rs147684209	0.850128	0.892012	IBD	TUFM
featureCounts	IBD	IFNg_SL1344	ENSG00000178952	rs56226746	299	1.90992e-06	3.32297e-06	0.0600133	0.103578	0.836404	5.68925e-07	3.858e-10	rs12928404	rs147684209	0.939981	0.889809	IBD	TUFM
featureCounts	IBD	naive	ENSG00000085978	rs34701569	877	1.02148e-13	1.34964e-14	0.549722	0.0722549	0.378023	0.00050959	1.745e-18	rs6745825	rs2241878	0.450278	0.839533	IBD	ATG16L1
featureCounts	IBD	IFNg	ENSG00000085978	rs34701569	877	1.18286e-14	1.25483e-14	0.0636572	0.0666609	0.869682	3.151e-06	1.745e-18	rs34701569	rs2241878	0.936343	0.928807	IBD	ATG16L1
featureCounts	IBD	SL1344	ENSG00000085978	rs34701569	877	1.43047e-13	1.45347e-14	0.769827	0.0780685	0.152104	0.00147602	1.745e-18	rs6754677	rs2241878	0.230173	0.660826	IBD	ATG16L1
featureCounts	IBD	IFNg_SL1344	ENSG00000085978	rs34701569	877	1.39281e-13	1.35742e-14	0.749559	0.0728737	0.177567	0.00292664	1.745e-18	rs13005285	rs2241878	0.250441	0.709019	IBD	ATG16L1
featureCounts	IBD	naive	ENSG00000165689	rs11145930	765	3.80709e-20	6.86591e-21	0.769477	0.13868	0.0918437	4.6313e-06	1.5e-25	rs11145930	rs4077515	0.230523	0.398414	IBD	SDCCAG3
featureCounts	IBD	naive	ENSG00000165689	rs73566945	788	3.79761e-20	6.97205e-21	0.76756	0.140825	0.0916149	4.6313e-06	1.5e-25	rs11145930	rs4077515	0.23244	0.394144	IBD	SDCCAG3
featureCounts	IBD	IFNg	ENSG00000165689	rs11145930	765	4.27653e-20	3.62481e-21	0.864358	0.073201	0.0624411	0.00200578	1.5e-25	rs10870079	rs4077515	0.135642	0.460337	IBD	SDCCAG3
featureCounts	IBD	IFNg	ENSG00000165689	rs73566945	788	4.27316e-20	3.6609e-21	0.863678	0.0739305	0.062392	0.00200578	1.5e-25	rs10870079	rs4077515	0.136322	0.457679	IBD	SDCCAG3
featureCounts	IBD	SL1344	ENSG00000165689	rs11145930	765	2.10005e-21	3.33399e-20	0.0424454	0.67357	0.283984	9.56027e-12	1.5e-25	rs11145930	rs4077515	0.957555	0.296573	IBD	SDCCAG3
featureCounts	IBD	SL1344	ENSG00000165689	rs73566945	788	2.09937e-21	3.33451e-20	0.0424317	0.673676	0.283892	9.56027e-12	1.5e-25	rs11145930	rs4077515	0.957568	0.296472	IBD	SDCCAG3
featureCounts	IBD	IFNg_SL1344	ENSG00000165689	rs11145930	765	8.2303e-22	3.80435e-21	0.0166348	0.0759849	0.90738	1.92619e-09	1.5e-25	rs73566945	rs4077515	0.983365	0.92273	IBD	SDCCAG3
featureCounts	IBD	IFNg_SL1344	ENSG00000165689	rs73566945	788	8.22989e-22	3.80661e-21	0.016634	0.0760305	0.907335	1.92619e-09	1.5e-25	rs73566945	rs4077515	0.983366	0.922683	IBD	SDCCAG3
featureCounts	IBD	naive	ENSG00000100325	rs11702929	855	1.66812e-05	0.000144687	0.00809761	0.0693134	0.922428	2.37451e-11	4.544e-08	rs11702929	rs5752968	0.991741	0.930109	IBD	ASCC2
featureCounts	IBD	naive	ENSG00000184076	rs140105	893	0.000152268	0.00017342	0.0488549	0.0547454	0.896074	2.4585e-08	4.544e-08	rs140105	rs5752968	0.950819	0.942423	IBD	UQCR10
featureCounts	IBD	naive	ENSG00000184076	rs2857647	895	0.000186929	0.000179123	0.0367601	0.0342965	0.928577	2.4585e-08	4.544e-08	rs140105	rs5752968	0.962874	0.964381	IBD	UQCR10
featureCounts	IBD	naive	ENSG00000100325	rs140105	893	2.27884e-05	0.000139883	0.0073116	0.0439327	0.948593	2.37451e-11	4.544e-08	rs11702929	rs5752968	0.992526	0.955737	IBD	ASCC2
featureCounts	IBD	IFNg	ENSG00000100325	rs11702929	855	0.000778942	0.000176803	0.378124	0.0852903	0.53563	5.69682e-05	4.544e-08	rs140105	rs5752968	0.62092	0.862639	IBD	ASCC2
featureCounts	IBD	IFNg	ENSG00000184076	rs140105	893	0.00179373	0.000464061	0.575515	0.14862	0.273608	4.40551e-05	4.544e-08	rs55684603	rs5752968	0.422227	0.64801	IBD	UQCR10
featureCounts	IBD	IFNg	ENSG00000184076	rs2857647	895	0.00269379	0.000773859	0.52974	0.151866	0.314926	1.40314e-05	4.544e-08	rs4823045	rs5752968	0.466792	0.67466	IBD	UQCR10
featureCounts	IBD	IFNg	ENSG00000100325	rs140105	893	0.00119654	0.00021899	0.383908	0.0697175	0.544959	5.69682e-05	4.544e-08	rs140105	rs5752968	0.614676	0.886579	IBD	ASCC2
featureCounts	IBD	SL1344	ENSG00000100325	rs11702929	855	0.00175851	0.000146188	0.853636	0.0708908	0.0735681	0.000645548	4.544e-08	rs112747660	rs5752968	0.144459	0.509267	IBD	ASCC2
featureCounts	IBD	SL1344	ENSG00000184076	rs140105	893	0.00184311	0.000395624	0.591359	0.126655	0.279747	0.000366955	4.544e-08	rs56246484	rs5752968	0.406402	0.68835	IBD	UQCR10
featureCounts	IBD	SL1344	ENSG00000184076	rs2857647	895	0.00285693	0.00065878	0.561822	0.129245	0.305417	4.70111e-05	4.544e-08	rs4823045	rs5752968	0.434662	0.702654	IBD	UQCR10
featureCounts	IBD	SL1344	ENSG00000100325	rs140105	893	0.00263975	0.000244409	0.846959	0.0783462	0.0718107	0.000209614	4.544e-08	rs147896390	rs5752968	0.150157	0.478238	IBD	ASCC2
featureCounts	IBD	IFNg_SL1344	ENSG00000100325	rs11702929	855	0.00175297	0.000144604	0.850952	0.0701183	0.0770323	0.00873327	4.544e-08	rs1800540	rs5752968	0.147151	0.523493	IBD	ASCC2
featureCounts	IBD	IFNg_SL1344	ENSG00000184076	rs140105	893	0.00214195	0.000588172	0.687239	0.188592	0.121438	4.46758e-05	4.544e-08	rs62227971	rs5752968	0.310031	0.391698	IBD	UQCR10
featureCounts	IBD	IFNg_SL1344	ENSG00000184076	rs2857647	895	0.00331733	0.00103494	0.652362	0.203385	0.139901	4.46758e-05	4.544e-08	rs62227971	rs5752968	0.343286	0.407536	IBD	UQCR10
featureCounts	IBD	IFNg_SL1344	ENSG00000100325	rs140105	893	0.0026392	0.00023576	0.846781	0.0755683	0.0747757	0.00741932	4.544e-08	rs144230652	rs5752968	0.150344	0.497364	IBD	ASCC2
featureCounts	IBD	naive	ENSG00000279487	rs4072037	463	0.0173682	0.000702698	0.87619	0.0353793	0.0703598	0.00906144	6.915e-07	rs201008360	rs734073	0.105739	0.665409	IBD	AC234582.1
featureCounts	IBD	naive	ENSG00000279487	rs138507724	437	0.0173245	0.000663521	0.877832	0.03355	0.0706303	0.00906144	6.915e-07	rs201008360	rs734073	0.10418	0.677962	IBD	AC234582.1
featureCounts	IBD	naive	ENSG00000279487	rs2990245	438	0.0173346	0.000664875	0.877791	0.0335974	0.0706122	0.00906144	6.915e-07	rs201008360	rs734073	0.10421	0.677598	IBD	AC234582.1
featureCounts	IBD	IFNg	ENSG00000279487	rs4072037	463	8.60466e-05	0.00158453	0.00434088	0.0790214	0.914967	1.13909e-10	6.915e-07	rs4072037	rs734073	0.993989	0.920501	IBD	AC234582.1
featureCounts	IBD	IFNg	ENSG00000279487	rs138507724	437	8.60138e-05	0.00158399	0.00435833	0.0793463	0.914625	1.13909e-10	6.915e-07	rs4072037	rs734073	0.993972	0.920172	IBD	AC234582.1
featureCounts	IBD	IFNg	ENSG00000279487	rs2990245	438	8.60185e-05	0.00158406	0.00435581	0.0792991	0.914675	1.13909e-10	6.915e-07	rs4072037	rs734073	0.993974	0.92022	IBD	AC234582.1
featureCounts	IBD	SL1344	ENSG00000279487	rs4072037	463	0.00981706	0.00181177	0.495251	0.0909981	0.402122	8.34326e-06	6.915e-07	rs138507724	rs734073	0.49312	0.815465	IBD	AC234582.1
featureCounts	IBD	SL1344	ENSG00000279487	rs138507724	437	0.00976287	0.00183278	0.494685	0.0924661	0.401253	8.34326e-06	6.915e-07	rs138507724	rs734073	0.493719	0.812715	IBD	AC234582.1
featureCounts	IBD	SL1344	ENSG00000279487	rs2990245	438	0.00977041	0.00182997	0.494755	0.0922649	0.40138	8.34326e-06	6.915e-07	rs138507724	rs734073	0.493645	0.813095	IBD	AC234582.1
featureCounts	IBD	IFNg_SL1344	ENSG00000279487	rs4072037	463	0.000823813	0.00217007	0.0415597	0.108629	0.846818	8.91923e-09	6.915e-07	rs2990245	rs734073	0.955446	0.886306	IBD	AC234582.1
featureCounts	IBD	IFNg_SL1344	ENSG00000279487	rs138507724	437	0.000823257	0.00216802	0.0417145	0.109008	0.846287	8.91923e-09	6.915e-07	rs2990245	rs734073	0.955294	0.885891	IBD	AC234582.1
featureCounts	IBD	IFNg_SL1344	ENSG00000279487	rs2990245	438	0.000823345	0.00216817	0.0416926	0.108945	0.84637	8.91923e-09	6.915e-07	rs2990245	rs734073	0.955316	0.885959	IBD	AC234582.1
featureCounts	IBD	naive	ENSG00000168610	rs35455295	537	4.91908e-08	2.95339e-08	0.11113	0.0658986	0.822972	1.80868e-06	2.157e-12	rs35455295	rs744166	0.88887	0.925863	IBD	STAT3
featureCounts	IBD	IFNg	ENSG00000168610	rs35455295	537	3.78846e-07	1.97139e-08	0.855873	0.044437	0.09969	0.0354644	2.157e-12	rs9913963	rs744166	0.144127	0.691682	IBD	STAT3
featureCounts	IBD	SL1344	ENSG00000168610	rs35455295	537	3.87373e-07	1.84536e-08	0.875135	0.0416062	0.0832587	0.0175662	2.157e-12	rs5016637	rs744166	0.124865	0.66679	IBD	STAT3
featureCounts	IBD	IFNg_SL1344	ENSG00000168610	rs35455295	537	3.26851e-07	2.30947e-08	0.738407	0.051965	0.209627	0.000262065	2.157e-12	rs62076937	rs744166	0.261592	0.801351	IBD	STAT3
featureCounts	UC	naive	ENSG00000188820	rs2637678	785	2.92118e-05	0.000939475	0.00030836	0.00892733	0.989796	7.98893e-12	6.199e-07	rs2637681	rs2858829	0.998723	0.991061	IBD	FAM26F
featureCounts	UC	naive	ENSG00000188820	rs117361304	792	2.92117e-05	0.000939489	0.000308395	0.00892861	0.989794	7.98893e-12	6.199e-07	rs2637681	rs2858829	0.998723	0.99106	IBD	FAM26F
featureCounts	UC	IFNg	ENSG00000188820	rs2637678	785	0.00496787	0.0650981	0.052441	0.686986	0.190507	1.41054e-18	6.199e-07	rs117361304	rs2858829	0.877493	0.217103	IBD	FAM26F
featureCounts	UC	IFNg	ENSG00000188820	rs117361304	792	0.00496747	0.0650925	0.0524427	0.687006	0.190492	1.41054e-18	6.199e-07	rs117361304	rs2858829	0.877497	0.217085	IBD	FAM26F
featureCounts	UC	SL1344	ENSG00000188820	rs2637678	785	0.00621186	0.00922339	0.0655725	0.0965399	0.822452	2.99957e-10	6.199e-07	rs117361304	rs2858829	0.918992	0.89495	IBD	FAM26F
featureCounts	UC	SL1344	ENSG00000188820	rs117361304	792	0.00621147	0.00922654	0.0655759	0.0965843	0.822402	2.99957e-10	6.199e-07	rs117361304	rs2858829	0.918986	0.894901	IBD	FAM26F
featureCounts	UC	IFNg_SL1344	ENSG00000188820	rs2637678	785	0.01395	0.0561637	0.147257	0.592675	0.189954	8.05621e-12	6.199e-07	rs117361304	rs2858829	0.78263	0.242713	IBD	FAM26F
featureCounts	UC	IFNg_SL1344	ENSG00000188820	rs117361304	792	0.013948	0.0561607	0.147252	0.592712	0.189927	8.05621e-12	6.199e-07	rs117361304	rs2858829	0.782639	0.242676	IBD	FAM26F
featureCounts	UC	naive	ENSG00000165689	rs11145930	765	3.16736e-08	5.71219e-09	0.770438	0.138854	0.0907082	4.6313e-06	2.894e-13	rs11145930	rs3829111	0.229562	0.395136	IBD	SDCCAG3
featureCounts	UC	naive	ENSG00000165689	rs73566945	788	3.15946e-08	5.80048e-09	0.768516	0.141002	0.090482	4.6313e-06	2.894e-13	rs11145930	rs3829111	0.231484	0.390878	IBD	SDCCAG3
featureCounts	UC	IFNg	ENSG00000165689	rs11145930	765	3.55338e-08	3.01187e-09	0.864334	0.0731989	0.0624673	0.00200578	2.894e-13	rs10870079	rs3829111	0.135666	0.460448	IBD	SDCCAG3
featureCounts	UC	IFNg	ENSG00000165689	rs73566945	788	3.55059e-08	3.04185e-09	0.863653	0.0739284	0.0624182	0.00200578	2.894e-13	rs10870079	rs3829111	0.136347	0.45779	IBD	SDCCAG3
featureCounts	UC	SL1344	ENSG00000165689	rs11145930	765	1.72187e-09	2.7336e-08	0.0418831	0.664633	0.293483	9.56027e-12	2.894e-13	rs11145930	rs3829111	0.958117	0.306313	IBD	SDCCAG3
featureCounts	UC	SL1344	ENSG00000165689	rs73566945	788	1.72132e-09	2.73404e-08	0.0418697	0.664741	0.29339	9.56027e-12	2.894e-13	rs11145930	rs3829111	0.95813	0.30621	IBD	SDCCAG3
featureCounts	UC	IFNg_SL1344	ENSG00000165689	rs11145930	765	6.69048e-10	3.09259e-09	0.0162741	0.0743156	0.90941	1.92619e-09	2.894e-13	rs73566945	rs3829111	0.983726	0.924455	IBD	SDCCAG3
featureCounts	UC	IFNg_SL1344	ENSG00000165689	rs73566945	788	6.69016e-10	3.09443e-09	0.0162733	0.0743603	0.909366	1.92619e-09	2.894e-13	rs73566945	rs3829111	0.983727	0.92441	IBD	SDCCAG3
featureCounts	UC	naive	ENSG00000070808	rs11744389	862	0.00706495	0.000551184	0.861548	0.0671514	0.0636847	0.0249331	2.449e-08	rs2748249	rs71587799	0.130836	0.486752	IBD	CAMK2A
featureCounts	UC	IFNg	ENSG00000070808	rs11744389	862	0.00636588	0.000527755	0.776298	0.0642053	0.152603	0.021982	2.449e-08	rs7711408	rs71587799	0.216808	0.703861	IBD	CAMK2A
featureCounts	UC	SL1344	ENSG00000070808	rs11744389	862	4.75441e-07	0.00248274	5.79785e-05	0.302066	0.695393	1.65926e-16	2.449e-08	rs11744389	rs71587799	0.997459	0.697164	IBD	CAMK2A
featureCounts	UC	IFNg_SL1344	ENSG00000070808	rs11744389	862	8.90463e-05	0.000584136	0.0108589	0.0703154	0.918153	4.91681e-10	2.449e-08	rs11744389	rs71587799	0.988468	0.928864	IBD	CAMK2A
featureCounts	UC	naive	ENSG00000168610	rs35455295	537	0.0019859	0.00119232	0.0946422	0.0559765	0.846203	1.80868e-06	1.256e-07	rs35455295	rs7216516	0.90218	0.937954	IBD	STAT3
featureCounts	UC	IFNg	ENSG00000168610	rs35455295	537	0.0176574	0.000918833	0.841503	0.0436927	0.0962281	0.0354644	1.256e-07	rs9913963	rs7216516	0.139921	0.687733	IBD	STAT3
featureCounts	UC	SL1344	ENSG00000168610	rs35455295	537	0.018083	0.000861435	0.861786	0.0409753	0.0782939	0.0175662	1.256e-07	rs5016637	rs7216516	0.119269	0.656447	IBD	STAT3
featureCounts	UC	IFNg_SL1344	ENSG00000168610	rs35455295	537	0.0154069	0.00108862	0.734248	0.0516831	0.197574	0.000262065	1.256e-07	rs62076937	rs7216516	0.249257	0.792651	IBD	STAT3
featureCounts	UC	naive	ENSG00000130592	rs907612	1191	0.000131685	0.000463419	0.00173401	0.00510967	0.992561	2.70312e-11	5.723e-07	rs907612	rs907612	0.997671	0.994878	IBD	LSP1
featureCounts	UC	naive	ENSG00000130592	rs72843957	1118	0.000131686	0.000462796	0.00173463	0.00510363	0.992567	2.70312e-11	5.723e-07	rs907612	rs907612	0.997671	0.994884	IBD	LSP1
featureCounts	UC	IFNg	ENSG00000130592	rs907612	1191	0.0104774	0.0017922	0.137965	0.0227724	0.826993	5.88362e-07	5.723e-07	rs907612	rs907612	0.849766	0.973202	IBD	LSP1
featureCounts	UC	IFNg	ENSG00000130592	rs72843957	1118	0.0104867	0.00172644	0.138136	0.0219138	0.827737	5.88362e-07	5.723e-07	rs907612	rs907612	0.849651	0.974208	IBD	LSP1
featureCounts	UC	SL1344	ENSG00000130592	rs907612	1191	0.00114378	0.000638478	0.0150612	0.00743167	0.975725	3.30979e-09	5.723e-07	rs907612	rs907612	0.983157	0.992441	IBD	LSP1
featureCounts	UC	SL1344	ENSG00000130592	rs72843957	1118	0.00114369	0.000643264	0.0150653	0.00749776	0.97565	3.30979e-09	5.723e-07	rs907612	rs907612	0.983148	0.992374	IBD	LSP1
featureCounts	UC	IFNg_SL1344	ENSG00000130592	rs907612	1191	0.0451287	0.00563215	0.594249	0.0738823	0.281108	6.67445e-05	5.723e-07	rs72843957	rs907612	0.354991	0.791875	IBD	LSP1
featureCounts	UC	IFNg_SL1344	ENSG00000130592	rs72843957	1118	0.0453091	0.00535419	0.596834	0.0702458	0.282257	6.67445e-05	5.723e-07	rs72843957	rs907612	0.352503	0.800722	IBD	LSP1
featureCounts	NAR	naive	ENSG00000103811	rs4779154	240	8.03862e-05	5.60689e-05	0.105249	0.0725889	0.822025	2.28105e-09	1.58e-09	rs4779154	rs34593439	0.894614	0.91886	NAR	CTSH
featureCounts	NAR	naive	ENSG00000103811	rs35514372	238	8.03875e-05	5.60578e-05	0.105251	0.0725743	0.822038	2.28105e-09	1.58e-09	rs4779154	rs34593439	0.894612	0.918876	NAR	CTSH
featureCounts	NAR	naive	ENSG00000103811	rs200464343	240	8.03862e-05	5.60689e-05	0.105249	0.0725889	0.822025	2.28105e-09	1.58e-09	rs4779154	rs34593439	0.894614	0.91886	NAR	CTSH
featureCounts	NAR	IFNg	ENSG00000103811	rs4779154	240	0.000152884	2.71474e-05	0.200171	0.0347791	0.76487	5.70092e-08	1.58e-09	rs35514372	rs34593439	0.799649	0.956507	NAR	CTSH
featureCounts	NAR	IFNg	ENSG00000103811	rs35514372	238	0.000152889	2.71237e-05	0.200177	0.0347482	0.764895	5.70092e-08	1.58e-09	rs35514372	rs34593439	0.799643	0.956545	NAR	CTSH
featureCounts	NAR	IFNg	ENSG00000103811	rs200464343	240	0.000152884	2.71474e-05	0.200171	0.0347791	0.76487	5.70092e-08	1.58e-09	rs35514372	rs34593439	0.799649	0.956507	NAR	CTSH
featureCounts	NAR	SL1344	ENSG00000103811	rs4779154	240	1.60617e-05	0.000189908	0.0210295	0.247915	0.730849	1.20497e-11	1.58e-09	rs4779154	rs34593439	0.978765	0.746706	NAR	CTSH
featureCounts	NAR	SL1344	ENSG00000103811	rs35514372	238	1.60617e-05	0.000189906	0.0210296	0.247913	0.730852	1.20497e-11	1.58e-09	rs4779154	rs34593439	0.978764	0.746708	NAR	CTSH
featureCounts	NAR	SL1344	ENSG00000103811	rs200464343	240	1.60617e-05	0.000189908	0.0210295	0.247915	0.730849	1.20497e-11	1.58e-09	rs4779154	rs34593439	0.978765	0.746706	NAR	CTSH
featureCounts	NAR	IFNg_SL1344	ENSG00000103811	rs4779154	240	1.44702e-05	9.72525e-06	0.0189458	0.011764	0.969266	2.52597e-11	1.58e-09	rs200464343	rs34593439	0.98103	0.988009	NAR	CTSH
featureCounts	NAR	IFNg_SL1344	ENSG00000103811	rs35514372	238	1.44702e-05	9.72317e-06	0.0189458	0.0117613	0.969269	2.52597e-11	1.58e-09	rs200464343	rs34593439	0.98103	0.988011	NAR	CTSH
featureCounts	NAR	IFNg_SL1344	ENSG00000103811	rs200464343	240	1.44702e-05	9.72525e-06	0.0189458	0.011764	0.969266	2.52597e-11	1.58e-09	rs200464343	rs34593439	0.98103	0.988009	NAR	CTSH
featureCounts	RA	naive	ENSG00000056558	rs201497854	660	0.000665285	6.16776e-05	0.797846	0.0738396	0.127587	0.00521648	1.7e-08	rs7031128	rs10985070	0.201427	0.633417	RA	TRAF1
featureCounts	RA	IFNg	ENSG00000056558	rs201497854	660	0.000728648	4.22826e-05	0.873835	0.0506329	0.0747615	0.00909204	1.7e-08	rs75780782	rs10985070	0.125394	0.596211	RA	TRAF1
featureCounts	RA	SL1344	ENSG00000056558	rs201497854	660	0.000147963	7.64953e-05	0.177446	0.0910061	0.731324	9.34102e-06	1.7e-08	rs201497854	rs10985070	0.82233	0.889331	RA	TRAF1
featureCounts	RA	IFNg_SL1344	ENSG00000056558	rs201497854	660	9.96995e-08	3.66329e-05	0.000119565	0.0429754	0.956868	1.5327e-12	1.7e-08	rs201497854	rs10985070	0.999844	0.957018	RA	TRAF1
featureCounts	RA	naive	ENSG00000112977	rs182073	1047	0.00637953	0.00342029	0.134862	0.0715207	0.783817	2.96757e-07	9.3e-07	rs182073	rs267949	0.855338	0.916383	RA	DAP
featureCounts	RA	naive	ENSG00000112977	rs2964789	992	0.00638392	0.00339206	0.134948	0.0709198	0.784356	2.96757e-07	9.3e-07	rs182073	rs267949	0.855276	0.91708	RA	DAP
featureCounts	RA	naive	ENSG00000112977	rs9857	929	0.00639242	0.00333724	0.135117	0.0697539	0.7854	2.96757e-07	9.3e-07	rs182073	rs267949	0.855154	0.918431	RA	DAP
featureCounts	RA	IFNg	ENSG00000112977	rs182073	1047	0.00452253	0.00412401	0.0956055	0.0863716	0.809376	1.42247e-08	9.3e-07	rs2964789	rs267949	0.895748	0.903576	RA	DAP
featureCounts	RA	IFNg	ENSG00000112977	rs2964789	992	0.00452471	0.00410464	0.0956469	0.0859573	0.809766	1.42247e-08	9.3e-07	rs2964789	rs267949	0.895724	0.904036	RA	DAP
featureCounts	RA	IFNg	ENSG00000112977	rs9857	929	0.00452783	0.00407701	0.0957049	0.0853656	0.810325	1.42247e-08	9.3e-07	rs2964789	rs267949	0.89569	0.904693	RA	DAP
featureCounts	RA	SL1344	ENSG00000112977	rs182073	1047	0.00733695	0.00389097	0.155102	0.0815024	0.752168	1.52812e-06	9.3e-07	rs9857	rs267949	0.83367	0.902237	RA	DAP
featureCounts	RA	SL1344	ENSG00000112977	rs2964789	992	0.00734297	0.00385765	0.155222	0.0807932	0.752785	1.52812e-06	9.3e-07	rs9857	rs267949	0.833578	0.903077	RA	DAP
featureCounts	RA	SL1344	ENSG00000112977	rs9857	929	0.00734941	0.00382239	0.155345	0.0800406	0.753443	1.52812e-06	9.3e-07	rs9857	rs267949	0.833484	0.903969	RA	DAP
featureCounts	RA	IFNg_SL1344	ENSG00000112977	rs182073	1047	0.00359486	0.004118	0.0759947	0.0862238	0.830069	6.09251e-09	9.3e-07	rs182073	rs267949	0.916292	0.905899	RA	DAP
featureCounts	RA	IFNg_SL1344	ENSG00000112977	rs2964789	992	0.00359621	0.00410286	0.0760196	0.0858991	0.830382	6.09251e-09	9.3e-07	rs182073	rs267949	0.916281	0.906252	RA	DAP
featureCounts	RA	IFNg_SL1344	ENSG00000112977	rs9857	929	0.00359789	0.00408441	0.0760486	0.0855016	0.830768	6.09251e-09	9.3e-07	rs182073	rs267949	0.916269	0.906685	RA	DAP
featureCounts	RA	naive	ENSG00000197728	rs1131017	266	4.92999e-14	0.00214521	3.36681e-12	0.145649	0.852206	2.21497e-32	8.5e-08	rs1131017	rs773125	0.997855	0.854038	RA	RPS26
featureCounts	RA	IFNg	ENSG00000197728	rs1131017	266	1.48176e-12	0.00135584	1.01193e-10	0.0916867	0.906957	9.06476e-29	8.5e-08	rs1131017	rs773125	0.998644	0.908189	RA	RPS26
featureCounts	RA	SL1344	ENSG00000197728	rs1131017	266	4.40021e-14	0.00206936	3.00501e-12	0.140464	0.857466	1.98784e-32	8.5e-08	rs1131017	rs773125	0.997931	0.859244	RA	RPS26
featureCounts	RA	IFNg_SL1344	ENSG00000197728	rs1131017	266	1.86994e-12	0.00119378	1.27703e-10	0.0806081	0.918198	2.06092e-28	8.5e-08	rs1131017	rs773125	0.998806	0.919296	RA	RPS26
featureCounts	RA	naive	ENSG00000134824	rs968567	673	0.00104497	0.00437019	0.00792695	0.0321969	0.954461	3.01509e-10	7.4e-07	rs61896141	rs968567	0.986658	0.967368	RA	FADS2
featureCounts	RA	naive	ENSG00000134824	rs192793035	672	0.00104498	0.00436973	0.00792693	0.0321931	0.954465	3.01509e-10	7.4e-07	rs61896141	rs968567	0.986658	0.967372	RA	FADS2
featureCounts	RA	IFNg	ENSG00000134824	rs968567	673	0.000361591	0.00320943	0.00274295	0.0233758	0.97031	1.90289e-11	7.4e-07	rs61896141	rs968567	0.993686	0.976476	RA	FADS2
featureCounts	RA	IFNg	ENSG00000134824	rs192793035	672	0.000361591	0.00320941	0.00274293	0.0233754	0.970311	1.90289e-11	7.4e-07	rs61896141	rs968567	0.993686	0.976476	RA	FADS2
featureCounts	RA	SL1344	ENSG00000134824	rs968567	673	0.015352	0.00868821	0.116457	0.0651126	0.79439	7.17998e-08	7.4e-07	rs192793035	rs968567	0.859503	0.924244	RA	FADS2
featureCounts	RA	SL1344	ENSG00000134824	rs192793035	672	0.0153522	0.00868698	0.116458	0.0651028	0.7944	7.17998e-08	7.4e-07	rs192793035	rs968567	0.859503	0.924255	RA	FADS2
featureCounts	RA	IFNg_SL1344	ENSG00000134824	rs968567	673	0.00968658	0.0113911	0.0734804	0.0855907	0.819851	9.73493e-08	7.4e-07	rs192793035	rs968567	0.905442	0.905471	RA	FADS2
featureCounts	RA	IFNg_SL1344	ENSG00000134824	rs192793035	672	0.00968665	0.0113906	0.0734804	0.085586	0.819856	9.73493e-08	7.4e-07	rs192793035	rs968567	0.905442	0.905476	RA	FADS2
featureCounts	SCZ	naive	ENSG00000151164	rs6606688	403	0.00112786	0.0249197	0.0364325	0.804836	0.132684	5.72985e-12	3.236e-07	rs34686679	rs35564692	0.93752	0.141527	SCZ	RAD9B
featureCounts	SCZ	naive	ENSG00000111231	rs201025453	395	0.000326884	0.000985797	0.0105742	0.0309319	0.957181	3.75024e-09	3.236e-07	rs201025453	rs35564692	0.988113	0.968696	SCZ	GPN3
featureCounts	SCZ	naive	ENSG00000111231	rs4766500	429	0.000308959	0.00107161	0.0106649	0.0360388	0.951916	3.75024e-09	3.236e-07	rs201025453	rs35564692	0.987955	0.963522	SCZ	GPN3
featureCounts	SCZ	naive	ENSG00000111237	rs4766492	384	0.0156365	0.00136333	0.505543	0.0436439	0.433813	0.000165444	3.236e-07	rs6606686	rs35564692	0.477457	0.908591	SCZ	VPS29
featureCounts	SCZ	IFNg	ENSG00000151164	rs6606688	403	0.00145488	0.0179647	0.0469963	0.57995	0.353634	4.63141e-11	3.236e-07	rs34686679	rs35564692	0.933584	0.378791	SCZ	RAD9B
featureCounts	SCZ	IFNg	ENSG00000111231	rs201025453	395	2.81726e-07	0.000932917	9.11342e-06	0.0292086	0.969849	7.58493e-16	3.236e-07	rs2339524	rs35564692	0.999058	0.970764	SCZ	GPN3
featureCounts	SCZ	IFNg	ENSG00000111231	rs4766500	429	1.93975e-07	0.00153104	6.6958e-06	0.0519031	0.946559	1.34609e-16	3.236e-07	rs10774603	rs35564692	0.998462	0.948017	SCZ	GPN3
featureCounts	SCZ	IFNg	ENSG00000111237	rs4766492	384	0.0234878	0.00120465	0.759386	0.0387706	0.177151	0.00731761	3.236e-07	rs6606686	rs35564692	0.215922	0.820441	SCZ	VPS29
featureCounts	SCZ	SL1344	ENSG00000151164	rs6606688	403	0.000678932	0.0208908	0.0219312	0.674541	0.281958	3.07113e-12	3.236e-07	rs34686679	rs35564692	0.956499	0.294782	SCZ	RAD9B
featureCounts	SCZ	SL1344	ENSG00000111231	rs201025453	395	0.0212271	0.00104678	0.686667	0.0336044	0.257455	0.00293912	3.236e-07	rs201025453	rs35564692	0.291059	0.884544	SCZ	GPN3
featureCounts	SCZ	SL1344	ENSG00000111231	rs4766500	429	0.0199138	0.00107128	0.687403	0.0367246	0.254887	0.00293912	3.236e-07	rs201025453	rs35564692	0.291612	0.874063	SCZ	GPN3
featureCounts	SCZ	SL1344	ENSG00000111237	rs4766492	384	0.00335367	0.00120341	0.108428	0.0380584	0.848957	2.96865e-06	3.236e-07	rs7976889	rs35564692	0.887015	0.957094	SCZ	VPS29
featureCounts	SCZ	IFNg_SL1344	ENSG00000151164	rs6606688	403	0.000224322	0.00266332	0.00724615	0.085127	0.904739	1.48779e-10	3.236e-07	rs34686679	rs35564692	0.989866	0.914002	SCZ	RAD9B
featureCounts	SCZ	IFNg_SL1344	ENSG00000111231	rs201025453	395	0.0138814	0.00120728	0.449043	0.0385564	0.497312	0.000129699	3.236e-07	rs10849903	rs35564692	0.535869	0.928049	SCZ	GPN3
featureCounts	SCZ	IFNg_SL1344	ENSG00000111231	rs4766500	429	0.0129583	0.00128147	0.447306	0.0437402	0.494714	0.000129699	3.236e-07	rs10849903	rs35564692	0.538454	0.918767	SCZ	GPN3
featureCounts	SCZ	IFNg_SL1344	ENSG00000111237	rs4766492	384	0.00729987	0.00118695	0.236013	0.0376576	0.717843	2.43021e-05	3.236e-07	rs7976889	rs35564692	0.755501	0.950155	SCZ	VPS29
featureCounts	SCZ	naive	ENSG00000163131	rs41271951	606	0.00497942	0.00031633	0.682539	0.043091	0.269074	9.94694e-06	2.598e-08	rs72702561	rs72700829	0.312165	0.861961	SCZ	CTSS
featureCounts	SCZ	IFNg	ENSG00000163131	rs41271951	606	0.00605685	0.000393453	0.830225	0.0538219	0.109503	0.00952782	2.598e-08	rs72702561	rs72700829	0.163325	0.670461	SCZ	CTSS
featureCounts	SCZ	SL1344	ENSG00000163131	rs41271951	606	0.00285202	0.000351008	0.390933	0.0475551	0.558309	9.60015e-07	2.598e-08	rs72700881	rs72700829	0.605864	0.921509	SCZ	CTSS
featureCounts	SCZ	IFNg_SL1344	ENSG00000163131	rs41271951	606	0.00124357	0.000291394	0.170458	0.0391531	0.788854	1.188e-10	2.598e-08	rs72702561	rs72700829	0.828007	0.952714	SCZ	CTSS
featureCounts	T2D	naive	ENSG00000109501	rs4689395	262	0.00159753	8.38713e-05	0.641708	0.0333667	0.323244	9.67309e-05	1.3e-08	rs4689395	rs1801214	0.356611	0.906434	T2D	WFS1
featureCounts	T2D	naive	ENSG00000109501	rs4689398	261	0.00159756	8.38318e-05	0.641719	0.0333508	0.323249	9.67309e-05	1.3e-08	rs4689395	rs1801214	0.3566	0.906475	T2D	WFS1
featureCounts	T2D	naive	ENSG00000109501	rs148797429	263	0.00159746	8.39853e-05	0.641678	0.0334126	0.323228	9.67309e-05	1.3e-08	rs4689395	rs1801214	0.356641	0.906313	T2D	WFS1
featureCounts	T2D	IFNg	ENSG00000109501	rs4689395	262	6.61389e-05	7.42082e-05	0.0265671	0.028864	0.944429	4.95805e-08	1.3e-08	rs4689398	rs1801214	0.973293	0.970344	T2D	WFS1
featureCounts	T2D	IFNg	ENSG00000109501	rs4689398	261	6.6139e-05	7.42038e-05	0.0265671	0.0288622	0.94443	4.95805e-08	1.3e-08	rs4689398	rs1801214	0.973293	0.970346	T2D	WFS1
featureCounts	T2D	IFNg	ENSG00000109501	rs148797429	263	6.61389e-05	7.4208e-05	0.0265671	0.0288639	0.944429	4.95805e-08	1.3e-08	rs4689398	rs1801214	0.973293	0.970344	T2D	WFS1
featureCounts	T2D	SL1344	ENSG00000109501	rs4689395	262	0.00158296	8.67034e-05	0.635855	0.0344996	0.327976	9.34026e-05	1.3e-08	rs148797429	rs1801214	0.362476	0.904822	T2D	WFS1
featureCounts	T2D	SL1344	ENSG00000109501	rs4689398	261	0.00158292	8.67749e-05	0.635836	0.0345284	0.327966	9.34026e-05	1.3e-08	rs148797429	rs1801214	0.362495	0.904748	T2D	WFS1
featureCounts	T2D	SL1344	ENSG00000109501	rs148797429	263	0.00158304	8.65806e-05	0.635887	0.0344503	0.327993	9.34026e-05	1.3e-08	rs148797429	rs1801214	0.362443	0.90495	T2D	WFS1
featureCounts	T2D	IFNg_SL1344	ENSG00000109501	rs4689395	262	0.00226209	5.48989e-05	0.908651	0.0219851	0.0670466	0.0142326	1.3e-08	rs12510392	rs1801214	0.0890317	0.753064	T2D	WFS1
featureCounts	T2D	IFNg_SL1344	ENSG00000109501	rs4689398	261	0.00226199	5.50057e-05	0.908611	0.022028	0.0670436	0.0142326	1.3e-08	rs12510392	rs1801214	0.0890716	0.752694	T2D	WFS1
featureCounts	T2D	IFNg_SL1344	ENSG00000109501	rs148797429	263	0.00226256	5.43904e-05	0.908842	0.0217808	0.0670606	0.0142326	1.3e-08	rs12510392	rs1801214	0.0888414	0.754835	T2D	WFS1
featureCounts	CAD	naive	ENSG00000107798	rs1412445	919	5.87976e-09	1.5983e-08	0.0046068	0.0115388	0.983854	6.27912e-10	5.15e-12	rs1412445	rs1412444	0.995393	0.988408	CAD	LIPA
featureCounts	CAD	IFNg	ENSG00000107798	rs1412445	919	3.14246e-07	4.27416e-08	0.246212	0.0327671	0.72102	2.55826e-05	5.15e-12	rs1412445	rs1412444	0.753788	0.95653	CAD	LIPA
featureCounts	CAD	SL1344	ENSG00000107798	rs1412445	919	2.58013e-10	1.50534e-08	0.000202154	0.0108053	0.988992	1.0352e-12	5.15e-12	rs1412445	rs1412444	0.999798	0.989192	CAD	LIPA
featureCounts	CAD	IFNg_SL1344	ENSG00000107798	rs1412445	919	4.88457e-07	5.21475e-08	0.382706	0.0402806	0.577012	9.13015e-05	5.15e-12	rs1412445	rs1412444	0.617293	0.934746	CAD	LIPA
featureCounts	CAD	naive	ENSG00000182511	rs1894400	1031	4.9437e-05	0.000220263	0.00588452	0.0252495	0.968596	1.23496e-09	5.01e-08	rs1894400	rs2521501	0.993846	0.974594	CAD	FES
featureCounts	CAD	naive	ENSG00000182511	rs4932178	1013	4.94376e-05	0.000220168	0.00588458	0.0252382	0.968608	1.23496e-09	5.01e-08	rs1894400	rs2521501	0.993846	0.974606	CAD	FES
featureCounts	CAD	IFNg	ENSG00000182511	rs1894400	1031	3.19525e-05	0.000282619	0.00380333	0.0326771	0.963205	3.38013e-10	5.01e-08	rs1894400	rs2521501	0.995882	0.967188	CAD	FES
featureCounts	CAD	IFNg	ENSG00000182511	rs4932178	1013	3.19527e-05	0.000282574	0.00380335	0.0326718	0.96321	3.38013e-10	5.01e-08	rs1894400	rs2521501	0.995882	0.967193	CAD	FES
featureCounts	CAD	SL1344	ENSG00000182511	rs1894400	1031	0.00578131	0.000614914	0.688154	0.0729612	0.232489	0.00167848	5.01e-08	rs12906125	rs2521501	0.30545	0.761135	CAD	FES
featureCounts	CAD	SL1344	ENSG00000182511	rs4932178	1013	0.00578826	0.000605654	0.68898	0.0718585	0.232768	0.00167848	5.01e-08	rs12906125	rs2521501	0.304626	0.764109	CAD	FES
featureCounts	CAD	IFNg_SL1344	ENSG00000182511	rs1894400	1031	4.91662e-05	0.00044502	0.00585229	0.0520294	0.941624	2.49303e-10	5.01e-08	rs4932371	rs2521501	0.993654	0.947638	CAD	FES
featureCounts	CAD	IFNg_SL1344	ENSG00000182511	rs4932178	1013	4.91667e-05	0.000444947	0.00585233	0.0520207	0.941633	2.49303e-10	5.01e-08	rs4932371	rs2521501	0.993654	0.947647	CAD	FES
featureCounts	CAD	naive	ENSG00000183386	rs11583126	655	0.000110391	0.00362519	0.00128007	0.0410828	0.953902	4.48499e-11	9.84e-07	rs11583126	rs28470722	0.994984	0.95871	CAD	FHL3
featureCounts	CAD	naive	ENSG00000183386	rs4634868	635	0.000110464	0.00360424	0.00127321	0.040588	0.954424	4.48499e-11	9.84e-07	rs11583126	rs28470722	0.995012	0.959209	CAD	FHL3
featureCounts	CAD	naive	ENSG00000183386	rs28416760	655	0.000110391	0.00362548	0.00128003	0.0410851	0.953899	4.48499e-11	9.84e-07	rs11583126	rs28470722	0.994984	0.958708	CAD	FHL3
featureCounts	CAD	IFNg	ENSG00000183386	rs11583126	655	0.00156826	0.0049148	0.0181851	0.0560716	0.91926	1.04575e-11	9.84e-07	rs4634868	rs28470722	0.975332	0.94251	CAD	FHL3
featureCounts	CAD	IFNg	ENSG00000183386	rs4634868	635	0.00157353	0.00474694	0.0181364	0.0537913	0.921752	1.04575e-11	9.84e-07	rs4634868	rs28470722	0.975543	0.94486	CAD	FHL3
featureCounts	CAD	IFNg	ENSG00000183386	rs28416760	655	0.00156805	0.00492502	0.0181822	0.0561886	0.919136	1.04575e-11	9.84e-07	rs4634868	rs28470722	0.975325	0.94239	CAD	FHL3
featureCounts	CAD	SL1344	ENSG00000183386	rs11583126	655	0.0590912	0.00860152	0.685207	0.0995936	0.147507	6.34071e-07	9.84e-07	rs590954	rs28470722	0.247101	0.596951	CAD	FHL3
featureCounts	CAD	SL1344	ENSG00000183386	rs4634868	635	0.0608103	0.00698584	0.700898	0.0803677	0.150939	1.71576e-06	9.84e-07	rs4634868	rs28470722	0.231306	0.652548	CAD	FHL3
featureCounts	CAD	SL1344	ENSG00000183386	rs28416760	655	0.0589093	0.00882123	0.683078	0.102139	0.147053	6.34071e-07	9.84e-07	rs590954	rs28470722	0.249191	0.590119	CAD	FHL3
featureCounts	CAD	IFNg_SL1344	ENSG00000183386	rs11583126	655	0.0632871	0.00586151	0.733861	0.0678394	0.129151	0.000120002	9.84e-07	rs28416760	rs28470722	0.19699	0.65562	CAD	FHL3
featureCounts	CAD	IFNg_SL1344	ENSG00000183386	rs4634868	635	0.064223	0.00523568	0.740232	0.0602163	0.130093	0.000120002	9.84e-07	rs28416760	rs28470722	0.190309	0.683587	CAD	FHL3
featureCounts	CAD	IFNg_SL1344	ENSG00000183386	rs28416760	655	0.0632361	0.00592272	0.733249	0.0685475	0.129045	0.000120002	9.84e-07	rs28416760	rs28470722	0.197592	0.653086	CAD	FHL3
featureCounts	MI	naive	ENSG00000182511	rs1894400	1031	9.81663e-05	0.000437373	0.00994165	0.0433481	0.946175	1.23496e-09	7.38837e-08	rs1894400	rs11372849	0.989523	0.956193	MI	FES
featureCounts	MI	naive	ENSG00000182511	rs4932178	1013	9.81682e-05	0.000437189	0.00994183	0.0433294	0.946193	1.23496e-09	7.38837e-08	rs1894400	rs11372849	0.989523	0.956212	MI	FES
featureCounts	MI	IFNg	ENSG00000182511	rs1894400	1031	6.88226e-05	0.000608733	0.00696991	0.060717	0.931636	3.38013e-10	7.38837e-08	rs1894400	rs11372849	0.992353	0.938815	MI	FES
featureCounts	MI	IFNg	ENSG00000182511	rs4932178	1013	6.88233e-05	0.00060864	0.00696997	0.0607074	0.931645	3.38013e-10	7.38837e-08	rs1894400	rs11372849	0.992353	0.938825	MI	FES
featureCounts	MI	SL1344	ENSG00000182511	rs1894400	1031	0.00738062	0.00078502	0.747462	0.0793367	0.165036	0.00167848	7.38837e-08	rs12906125	rs11372849	0.244372	0.675345	MI	FES
featureCounts	MI	SL1344	ENSG00000182511	rs4932178	1013	0.00739027	0.00077328	0.748438	0.0781474	0.165251	0.00167848	7.38837e-08	rs12906125	rs11372849	0.243399	0.678933	MI	FES
featureCounts	MI	IFNg_SL1344	ENSG00000182511	rs1894400	1031	9.94274e-05	0.00089995	0.0100694	0.0902425	0.898689	2.49303e-10	7.38837e-08	rs4932371	rs11372849	0.988931	0.908747	MI	FES
featureCounts	MI	IFNg_SL1344	ENSG00000182511	rs4932178	1013	9.9429e-05	0.00089981	0.0100695	0.0902281	0.898703	2.49303e-10	7.38837e-08	rs4932371	rs11372849	0.988931	0.908762	MI	FES
featureCounts	MI	naive	ENSG00000107798	rs1412445	919	4.29004e-10	1.16616e-09	0.0046796	0.011737	0.983583	6.27912e-10	2.6849e-13	rs1412445	rs1332329	0.99532	0.988208	MI	LIPA
featureCounts	MI	IFNg	ENSG00000107798	rs1412445	919	2.20524e-08	2.99942e-09	0.240549	0.0319903	0.727461	2.55826e-05	2.6849e-13	rs1412445	rs1332329	0.759451	0.957877	MI	LIPA
featureCounts	MI	SL1344	ENSG00000107798	rs1412445	919	1.73165e-11	1.01031e-09	0.00018889	0.0100307	0.98978	1.0352e-12	2.6849e-13	rs1412445	rs1332329	0.999811	0.989967	MI	LIPA
featureCounts	MI	IFNg_SL1344	ENSG00000107798	rs1412445	919	3.45127e-08	3.68457e-09	0.376467	0.0396076	0.583926	9.13015e-05	2.6849e-13	rs1412445	rs1332329	0.623533	0.936479	MI	LIPA
featureCounts	CRE	naive	ENSG00000169220	rs62397240	466	0.000292886	1.27709e-05	0.863349	0.0375464	0.0987993	0.047405	6.25e-10	rs377047936	rs3812036	0.136346	0.724624	CRE	RGS14
featureCounts	CRE	naive	ENSG00000169220	rs56235845	391	0.000294449	1.11007e-05	0.867768	0.0326154	0.0993107	0.0114763	6.25e-10	rs146911021	rs3812036	0.131926	0.752775	CRE	RGS14
featureCounts	CRE	naive	ENSG00000169220	rs12654812	393	0.000294418	1.11361e-05	0.867675	0.0327198	0.0993	0.0114763	6.25e-10	rs146911021	rs3812036	0.13202	0.75216	CRE	RGS14
featureCounts	CRE	IFNg	ENSG00000169220	rs62397240	466	0.000241496	2.31274e-05	0.711866	0.0679532	0.219917	0.000148198	6.25e-10	rs2431502	rs3812036	0.28787	0.763945	CRE	RGS14
featureCounts	CRE	IFNg	ENSG00000169220	rs56235845	391	0.000245446	1.80295e-05	0.723352	0.0529109	0.223474	0.000148198	6.25e-10	rs2431501	rs3812036	0.276385	0.808561	CRE	RGS14
featureCounts	CRE	IFNg	ENSG00000169220	rs12654812	393	0.000245084	1.85033e-05	0.722284	0.0543077	0.223144	0.000148198	6.25e-10	rs2431502	rs3812036	0.277452	0.804263	CRE	RGS14
featureCounts	CRE	SL1344	ENSG00000169220	rs62397240	466	3.24106e-05	8.93603e-06	0.0955375	0.025462	0.878959	5.82601e-07	6.25e-10	rs56235845	rs3812036	0.904421	0.971847	CRE	RGS14
featureCounts	CRE	SL1344	ENSG00000169220	rs56235845	391	3.24641e-05	8.40117e-06	0.0956746	0.0238786	0.880406	5.82601e-07	6.25e-10	rs56235845	rs3812036	0.904285	0.973594	CRE	RGS14
featureCounts	CRE	SL1344	ENSG00000169220	rs12654812	393	3.2463e-05	8.4122e-06	0.0956714	0.0239111	0.880377	5.82601e-07	6.25e-10	rs56235845	rs3812036	0.904288	0.973558	CRE	RGS14
featureCounts	CRE	IFNg_SL1344	ENSG00000169220	rs62397240	466	1.29193e-06	1.03628e-05	0.00380826	0.0295802	0.9666	1.61598e-11	6.25e-10	rs12654812	rs3812036	0.99618	0.970306	CRE	RGS14
featureCounts	CRE	IFNg_SL1344	ENSG00000169220	rs56235845	391	1.29219e-06	1.03006e-05	0.00380819	0.0293901	0.96679	1.61598e-11	6.25e-10	rs12654812	rs3812036	0.99618	0.970497	CRE	RGS14
featureCounts	CRE	IFNg_SL1344	ENSG00000169220	rs12654812	393	1.29218e-06	1.03012e-05	0.00380818	0.0293917	0.966788	1.61598e-11	6.25e-10	rs12654812	rs3812036	0.99618	0.970496	CRE	RGS14
featureCounts	HDL	naive	ENSG00000131042	rs67594749	850	0.000193804	0.00132049	0.0161111	0.108901	0.873474	1.30619e-12	1.18e-08	rs67594749	rs34574962	0.982375	0.889145	HDL	LILRB2
featureCounts	HDL	naive	ENSG00000105609	rs34574962	819	0.00226458	0.000196169	0.188256	0.0155139	0.79377	8.31493e-06	1.18e-08	rs34574962	rs34574962	0.809284	0.98083	HDL	LILRB5
featureCounts	HDL	naive	ENSG00000131042	rs34574962	819	0.000193813	0.00132001	0.0161118	0.108859	0.873515	1.30619e-12	1.18e-08	rs67594749	rs34574962	0.982374	0.889187	HDL	LILRB2
featureCounts	HDL	naive	ENSG00000187116	rs34574962	819	5.0188e-06	0.0057389	0.000417216	0.476561	0.517278	1.29793e-17	1.18e-08	rs67594749	rs34574962	0.993839	0.520485	HDL	LILRA5
featureCounts	HDL	IFNg	ENSG00000131042	rs67594749	850	0.000123603	2.50418e-05	0.0102752	0.00109327	0.988483	2.6933e-09	1.18e-08	rs34574962	rs34574962	0.989576	0.998895	HDL	LILRB2
featureCounts	HDL	IFNg	ENSG00000105609	rs34574962	819	0.00831382	0.000637649	0.691133	0.052761	0.247155	0.00355545	1.18e-08	rs11084337	rs34574962	0.299916	0.824081	HDL	LILRB5
featureCounts	HDL	IFNg	ENSG00000131042	rs34574962	819	0.000123606	2.47379e-05	0.0102754	0.00106797	0.988508	2.6933e-09	1.18e-08	rs34574962	rs34574962	0.989576	0.998921	HDL	LILRB2
featureCounts	HDL	IFNg	ENSG00000187116	rs34574962	819	0.000625012	0.0008713	0.0519576	0.0715567	0.874989	5.24154e-11	1.18e-08	rs67594749	rs34574962	0.946546	0.924402	HDL	LILRA5
featureCounts	HDL	SL1344	ENSG00000131042	rs67594749	850	0.000316666	4.65467e-05	0.0263248	0.00289906	0.970413	3.11939e-08	1.18e-08	rs34574962	rs34574962	0.973312	0.997021	HDL	LILRB2
featureCounts	HDL	SL1344	ENSG00000105609	rs34574962	819	0.00188989	0.000157334	0.157108	0.0122507	0.828594	4.64615e-06	1.18e-08	rs34574962	rs34574962	0.840845	0.985431	HDL	LILRB5
featureCounts	HDL	SL1344	ENSG00000131042	rs34574962	819	0.000316694	4.55254e-05	0.0263269	0.00281406	0.970497	3.11939e-08	1.18e-08	rs34574962	rs34574962	0.973311	0.997109	HDL	LILRB2
featureCounts	HDL	SL1344	ENSG00000187116	rs34574962	819	0.000191929	3.15041e-05	0.0159552	0.00163677	0.982185	8.41595e-09	1.18e-08	rs34574962	rs34574962	0.983821	0.998336	HDL	LILRA5
featureCounts	HDL	IFNg_SL1344	ENSG00000131042	rs67594749	850	9.7438e-05	2.16441e-05	0.00810013	0.000808324	0.990972	1.45967e-09	1.18e-08	rs34574962	rs34574962	0.991781	0.999185	HDL	LILRB2
featureCounts	HDL	IFNg_SL1344	ENSG00000105609	rs34574962	819	0.00808399	0.000621174	0.672027	0.0513706	0.267897	0.00429707	1.18e-08	rs34574962	rs34574962	0.319268	0.839099	HDL	LILRB5
featureCounts	HDL	IFNg_SL1344	ENSG00000131042	rs34574962	819	9.74403e-05	2.1369e-05	0.00810027	0.000785427	0.990995	1.45967e-09	1.18e-08	rs34574962	rs34574962	0.991781	0.999208	HDL	LILRB2
featureCounts	HDL	IFNg_SL1344	ENSG00000187116	rs34574962	819	0.000257533	3.51969e-05	0.0214089	0.00194959	0.976349	1.81092e-08	1.18e-08	rs34574962	rs34574962	0.978298	0.998007	HDL	LILRA5
featureCounts	HDL	naive	ENSG00000134824	rs968567	831	9.64457e-07	4.53532e-06	0.0158573	0.0736577	0.91048	3.01509e-10	3.3e-10	rs61896141	rs4246215	0.984137	0.925155	HDL	FADS2
featureCounts	HDL	naive	ENSG00000134824	rs192793035	829	9.64471e-07	4.53448e-06	0.0158575	0.0736439	0.910493	3.01509e-10	3.3e-10	rs61896141	rs4246215	0.984137	0.925169	HDL	FADS2
featureCounts	HDL	IFNg	ENSG00000134824	rs968567	831	4.1599e-07	4.14205e-06	0.00683956	0.0671762	0.92598	1.90289e-11	3.3e-10	rs61896141	rs4246215	0.993156	0.932361	HDL	FADS2
featureCounts	HDL	IFNg	ENSG00000134824	rs192793035	829	4.15991e-07	4.14195e-06	0.00683958	0.0671746	0.925981	1.90289e-11	3.3e-10	rs61896141	rs4246215	0.993156	0.932362	HDL	FADS2
featureCounts	HDL	SL1344	ENSG00000134824	rs968567	831	5.95126e-06	3.93124e-06	0.0978486	0.0637978	0.838344	7.17998e-08	3.3e-10	rs192793035	rs4246215	0.902142	0.929282	HDL	FADS2
featureCounts	HDL	SL1344	ENSG00000134824	rs192793035	829	5.95149e-06	3.92899e-06	0.0978524	0.0637607	0.838377	7.17998e-08	3.3e-10	rs192793035	rs4246215	0.902138	0.929323	HDL	FADS2
featureCounts	HDL	IFNg_SL1344	ENSG00000134824	rs968567	831	2.68414e-06	3.67538e-06	0.0441317	0.0595329	0.896329	9.73493e-08	3.3e-10	rs192793035	rs4246215	0.955862	0.937718	HDL	FADS2
featureCounts	HDL	IFNg_SL1344	ENSG00000134824	rs192793035	829	2.68418e-06	3.6746e-06	0.0441323	0.0595202	0.896341	9.73493e-08	3.3e-10	rs192793035	rs4246215	0.955861	0.937731	HDL	FADS2
featureCounts	HGB	naive	ENSG00000134824	rs968567	831	6.25716e-06	2.94241e-05	0.0256289	0.119664	0.854671	3.01509e-10	1.04e-09	rs61896141	rs28456	0.974335	0.877184	HGB	FADS2
featureCounts	HGB	naive	ENSG00000134824	rs192793035	829	6.25732e-06	2.94189e-05	0.0256295	0.119643	0.854692	3.01509e-10	1.04e-09	rs61896141	rs28456	0.974335	0.877206	HGB	FADS2
featureCounts	HGB	IFNg	ENSG00000134824	rs968567	831	2.55808e-06	2.5471e-05	0.0104777	0.103441	0.886053	1.90289e-11	1.04e-09	rs61896141	rs28456	0.989494	0.89546	HGB	FADS2
featureCounts	HGB	IFNg	ENSG00000134824	rs192793035	829	2.55809e-06	2.54705e-05	0.0104777	0.103439	0.886055	1.90289e-11	1.04e-09	rs61896141	rs28456	0.989494	0.895463	HGB	FADS2
featureCounts	HGB	SL1344	ENSG00000134824	rs968567	831	3.26523e-05	2.15693e-05	0.133742	0.0875675	0.778637	7.17998e-08	1.04e-09	rs192793035	rs28456	0.866204	0.898907	HGB	FADS2
featureCounts	HGB	SL1344	ENSG00000134824	rs192793035	829	3.26541e-05	2.15572e-05	0.133749	0.087518	0.778679	7.17998e-08	1.04e-09	rs192793035	rs28456	0.866197	0.898963	HGB	FADS2
featureCounts	HGB	IFNg_SL1344	ENSG00000134824	rs968567	831	1.47125e-05	2.01458e-05	0.0602614	0.0816575	0.858046	9.73493e-08	1.04e-09	rs192793035	rs28456	0.939704	0.913103	HGB	FADS2
featureCounts	HGB	IFNg_SL1344	ENSG00000134824	rs192793035	829	1.47128e-05	2.01416e-05	0.0602626	0.0816405	0.858062	9.73493e-08	1.04e-09	rs192793035	rs28456	0.939703	0.913121	HGB	FADS2
featureCounts	MCH	naive	ENSG00000179115	rs2974753	379	0.00222831	0.000268399	0.394297	0.0469366	0.556269	7.34289e-05	7.09e-08	rs2974753	rs12151303	0.603206	0.922188	MCH	FARSA
featureCounts	MCH	naive	ENSG00000179115	rs741702	332	0.00223166	0.000259921	0.394952	0.0454428	0.557114	7.34289e-05	7.09e-08	rs2974753	rs12151303	0.602557	0.924583	MCH	FARSA
featureCounts	MCH	naive	ENSG00000179115	rs7409457	329	0.00223191	0.000259314	0.394997	0.0453354	0.557177	7.34289e-05	7.09e-08	rs2974753	rs12151303	0.602512	0.924756	MCH	FARSA
featureCounts	MCH	IFNg	ENSG00000179115	rs2974753	379	8.71867e-05	0.000227664	0.0154276	0.03934	0.944918	2.94914e-08	7.09e-08	rs9384	rs12151303	0.984258	0.960031	MCH	FARSA
featureCounts	MCH	IFNg	ENSG00000179115	rs741702	332	8.71916e-05	0.000227307	0.0154308	0.039283	0.944972	2.94914e-08	7.09e-08	rs9384	rs12151303	0.984255	0.960089	MCH	FARSA
featureCounts	MCH	IFNg	ENSG00000179115	rs7409457	329	8.7192e-05	0.000227284	0.0154309	0.039279	0.944976	2.94914e-08	7.09e-08	rs9384	rs12151303	0.984255	0.960093	MCH	FARSA
featureCounts	MCH	SL1344	ENSG00000179115	rs2974753	379	0.000132626	0.000335065	0.023468	0.0583717	0.917693	4.16124e-08	7.09e-08	rs116374652	rs12151303	0.976064	0.940197	MCH	FARSA
featureCounts	MCH	SL1344	ENSG00000179115	rs741702	332	0.000132639	0.000334447	0.023474	0.0582714	0.917788	4.16124e-08	7.09e-08	rs116374652	rs12151303	0.976059	0.940299	MCH	FARSA
featureCounts	MCH	SL1344	ENSG00000179115	rs7409457	329	0.00013264	0.00033441	0.0234742	0.0582649	0.917794	4.16124e-08	7.09e-08	rs116374652	rs12151303	0.976059	0.940306	MCH	FARSA
featureCounts	MCH	IFNg_SL1344	ENSG00000179115	rs2974753	379	0.00351908	0.000253431	0.622698	0.0445154	0.329014	0.00190274	7.09e-08	rs35359974	rs12151303	0.373529	0.880825	MCH	FARSA
featureCounts	MCH	IFNg_SL1344	ENSG00000179115	rs741702	332	0.00352656	0.000241398	0.624118	0.042392	0.329722	0.00190274	7.09e-08	rs35359974	rs12151303	0.372114	0.886078	MCH	FARSA
featureCounts	MCH	IFNg_SL1344	ENSG00000179115	rs7409457	329	0.00352706	0.000240636	0.624206	0.0422572	0.329769	0.00190274	7.09e-08	rs35359974	rs12151303	0.372026	0.886413	MCH	FARSA
featureCounts	PCV	naive	ENSG00000134824	rs968567	831	0.000445761	0.00209617	0.030752	0.143787	0.822919	3.01509e-10	7.79e-08	rs61896141	rs28456	0.966706	0.851261	PCV	FADS2
featureCounts	PCV	naive	ENSG00000134824	rs192793035	829	0.000445774	0.00209582	0.0307529	0.143763	0.822943	3.01509e-10	7.79e-08	rs61896141	rs28456	0.966705	0.851286	PCV	FADS2
featureCounts	PCV	IFNg	ENSG00000134824	rs968567	831	0.000150383	0.00149738	0.0103746	0.102415	0.885563	1.90289e-11	7.79e-08	rs61896141	rs28456	0.987978	0.896339	PCV	FADS2
featureCounts	PCV	IFNg	ENSG00000134824	rs192793035	829	0.000150383	0.00149734	0.0103746	0.102413	0.885565	1.90289e-11	7.79e-08	rs61896141	rs28456	0.987978	0.896341	PCV	FADS2
featureCounts	PCV	SL1344	ENSG00000134824	rs968567	831	0.00180628	0.00119318	0.124611	0.0815239	0.790866	7.17998e-08	7.79e-08	rs192793035	rs28456	0.87239	0.906551	PCV	FADS2
featureCounts	PCV	SL1344	ENSG00000134824	rs192793035	829	0.00180637	0.00119251	0.124617	0.0814776	0.790906	7.17998e-08	7.79e-08	rs192793035	rs28456	0.872384	0.906603	PCV	FADS2
featureCounts	PCV	IFNg_SL1344	ENSG00000134824	rs968567	831	0.000741654	0.00101554	0.0511649	0.0691818	0.877896	9.73493e-08	7.79e-08	rs192793035	rs28456	0.947078	0.926952	PCV	FADS2
featureCounts	PCV	IFNg_SL1344	ENSG00000134824	rs192793035	829	0.000741665	0.00101533	0.0511658	0.0691672	0.87791	9.73493e-08	7.79e-08	rs192793035	rs28456	0.947077	0.926968	PCV	FADS2
featureCounts	PLT	naive	ENSG00000030110	rs210142	1387	2.40203e-17	1.58509e-17	0.0155877	0.00931116	0.975101	2.60544e-08	4.83e-21	rs210142	rs210143	0.984412	0.990541	PLT	BAK1
featureCounts	PLT	naive	ENSG00000030110	rs13203795	1432	2.40071e-17	1.66887e-17	0.0155791	0.00985537	0.974566	2.60544e-08	4.83e-21	rs210142	rs210143	0.984421	0.989989	PLT	BAK1
featureCounts	PLT	IFNg	ENSG00000030110	rs210142	1387	7.48399e-17	3.33058e-17	0.0485665	0.0206827	0.930751	4.77088e-07	4.83e-21	rs210142	rs210143	0.951434	0.978262	PLT	BAK1
featureCounts	PLT	IFNg	ENSG00000030110	rs13203795	1432	7.4824e-17	3.36258e-17	0.0485562	0.0208905	0.930553	4.77088e-07	4.83e-21	rs210142	rs210143	0.951444	0.978043	PLT	BAK1
featureCounts	PLT	SL1344	ENSG00000030110	rs210142	1387	5.72855e-16	1.1621e-16	0.371748	0.0748596	0.553393	6.46767e-05	4.83e-21	rs13203795	rs210143	0.628252	0.880845	PLT	BAK1
featureCounts	PLT	SL1344	ENSG00000030110	rs13203795	1432	5.70239e-16	1.22716e-16	0.37005	0.079084	0.550866	6.46767e-05	4.83e-21	rs13203795	rs210143	0.62995	0.87446	PLT	BAK1
featureCounts	PLT	IFNg_SL1344	ENSG00000030110	rs210142	1387	1.12799e-15	1.68153e-16	0.731995	0.108962	0.159044	0.00566555	4.83e-21	rs4713656	rs210143	0.268005	0.593434	PLT	BAK1
featureCounts	PLT	IFNg_SL1344	ENSG00000030110	rs13203795	1432	1.12388e-15	1.73152e-16	0.729329	0.112206	0.158464	0.00566555	4.83e-21	rs4713656	rs210143	0.270671	0.585451	PLT	BAK1
featureCounts	PLT	naive	ENSG00000091640	rs72838327	967	1.89439e-05	6.40037e-06	0.273733	0.091849	0.634393	5.37026e-09	4.58e-10	rs72838327	rs72835078	0.726242	0.873528	PLT	SPAG7
featureCounts	PLT	naive	ENSG00000091640	rs4790716	1001	1.89313e-05	6.44188e-06	0.273552	0.0924492	0.633973	5.37026e-09	4.58e-10	rs72838327	rs72835078	0.726423	0.872734	PLT	SPAG7
featureCounts	PLT	naive	ENSG00000091640	17_4957541	1011	1.89267e-05	6.45741e-06	0.273484	0.0926738	0.633816	5.37026e-09	4.58e-10	rs72838327	rs72835078	0.72649	0.872436	PLT	SPAG7
featureCounts	PLT	naive	ENSG00000091640	rs55943469	970	1.89405e-05	6.41154e-06	0.273684	0.0920105	0.63428	5.37026e-09	4.58e-10	rs72838327	rs72835078	0.72629	0.873314	PLT	SPAG7
featureCounts	PLT	IFNg	ENSG00000091640	rs72838327	967	1.41505e-05	7.95596e-06	0.204471	0.11428	0.681227	1.07669e-10	4.58e-10	rs4790716	rs72835078	0.795507	0.856343	PLT	SPAG7
featureCounts	PLT	IFNg	ENSG00000091640	rs4790716	1001	1.41434e-05	7.98702e-06	0.204367	0.114729	0.680881	1.07669e-10	4.58e-10	rs4790716	rs72835078	0.795611	0.855797	PLT	SPAG7
featureCounts	PLT	IFNg	ENSG00000091640	17_4957541	1011	1.41408e-05	7.99816e-06	0.20433	0.11489	0.680758	1.07669e-10	4.58e-10	rs4790716	rs72835078	0.795648	0.855602	PLT	SPAG7
featureCounts	PLT	IFNg	ENSG00000091640	rs55943469	970	1.41483e-05	7.96569e-06	0.204439	0.114421	0.681119	1.07669e-10	4.58e-10	rs4790716	rs72835078	0.795539	0.856172	PLT	SPAG7
featureCounts	PLT	SL1344	ENSG00000091640	rs72838327	967	9.1492e-06	4.48122e-06	0.132203	0.0639484	0.803835	1.37234e-10	4.58e-10	17_4957541	rs72835078	0.867783	0.926308	PLT	SPAG7
featureCounts	PLT	SL1344	ENSG00000091640	rs4790716	1001	9.14416e-06	4.5169e-06	0.13213	0.0644644	0.803392	1.37234e-10	4.58e-10	17_4957541	rs72835078	0.867856	0.92572	PLT	SPAG7
featureCounts	PLT	SL1344	ENSG00000091640	17_4957541	1011	9.14308e-06	4.52449e-06	0.132115	0.0645742	0.803297	1.37234e-10	4.58e-10	17_4957541	rs72835078	0.867872	0.925595	PLT	SPAG7
featureCounts	PLT	SL1344	ENSG00000091640	rs55943469	970	9.15357e-06	4.4503e-06	0.132266	0.0635013	0.804219	1.37234e-10	4.58e-10	17_4957541	rs72835078	0.86772	0.926818	PLT	SPAG7
featureCounts	PLT	IFNg_SL1344	ENSG00000091640	rs72838327	967	2.97934e-05	5.99138e-06	0.430505	0.0860903	0.483369	1.04524e-07	4.58e-10	rs55943469	rs72835078	0.569459	0.848821	PLT	SPAG7
featureCounts	PLT	IFNg_SL1344	ENSG00000091640	rs4790716	1001	2.96947e-05	6.20078e-06	0.429079	0.0891175	0.481767	1.04524e-07	4.58e-10	rs55943469	rs72835078	0.570885	0.843896	PLT	SPAG7
featureCounts	PLT	IFNg_SL1344	ENSG00000091640	17_4957541	1011	2.96819e-05	6.22797e-06	0.428894	0.0895107	0.481559	1.04524e-07	4.58e-10	rs55943469	rs72835078	0.57107	0.843258	PLT	SPAG7
featureCounts	PLT	IFNg_SL1344	ENSG00000091640	rs55943469	970	2.97886e-05	6.00153e-06	0.430436	0.086237	0.483291	1.04524e-07	4.58e-10	rs55943469	rs72835078	0.569528	0.848582	PLT	SPAG7
featureCounts	PLT	naive	ENSG00000007341	rs7544663	716	4.37179e-11	0.00263609	8.05475e-10	0.0476187	0.949745	1.7674e-23	7.95e-07	rs7544663	rs902289	0.997364	0.952255	PLT	ST7L
featureCounts	PLT	IFNg	ENSG00000007341	rs7544663	716	3.96131e-09	0.00267395	7.29848e-08	0.0483168	0.949009	2.42188e-19	7.95e-07	rs7544663	rs902289	0.997326	0.951554	PLT	ST7L
featureCounts	PLT	SL1344	ENSG00000007341	rs7544663	716	1.63581e-05	0.0027977	0.000301388	0.0505997	0.946285	1.26836e-11	7.95e-07	rs7544663	rs902289	0.996885	0.949242	PLT	ST7L
featureCounts	PLT	IFNg_SL1344	ENSG00000007341	rs7544663	716	0.0390033	0.00320378	0.718613	0.0588473	0.180333	0.00345071	7.95e-07	rs4450018	rs902289	0.23918	0.753963	PLT	ST7L
featureCounts	TC	naive	ENSG00000134824	rs968567	831	8.71112e-09	4.09637e-08	0.0205546	0.0957735	0.883672	3.01509e-10	2.71e-12	rs61896141	rs174548	0.979445	0.902217	TC	FADS2
featureCounts	TC	naive	ENSG00000134824	rs192793035	829	8.71129e-09	4.09563e-08	0.020555	0.095756	0.883689	3.01509e-10	2.71e-12	rs61896141	rs174548	0.979445	0.902234	TC	FADS2
featureCounts	TC	IFNg	ENSG00000134824	rs968567	831	3.52792e-09	3.51278e-08	0.00832441	0.0819772	0.909698	1.90289e-11	2.71e-12	rs61896141	rs174548	0.991676	0.917335	TC	FADS2
featureCounts	TC	IFNg	ENSG00000134824	rs192793035	829	3.52793e-09	3.5127e-08	0.00832443	0.0819753	0.9097	1.90289e-11	2.71e-12	rs61896141	rs174548	0.991676	0.917337	TC	FADS2
featureCounts	TC	SL1344	ENSG00000134824	rs968567	831	4.96003e-08	3.27646e-08	0.117036	0.0765044	0.80646	7.17998e-08	2.71e-12	rs192793035	rs174548	0.882964	0.913355	TC	FADS2
featureCounts	TC	SL1344	ENSG00000134824	rs192793035	829	4.96026e-08	3.27461e-08	0.117041	0.0764606	0.806498	7.17998e-08	2.71e-12	rs192793035	rs174548	0.882958	0.913404	TC	FADS2
featureCounts	TC	IFNg_SL1344	ENSG00000134824	rs968567	831	2.19543e-08	3.00618e-08	0.0518029	0.0700552	0.878142	9.73493e-08	2.71e-12	rs192793035	rs174548	0.948197	0.926117	TC	FADS2
featureCounts	TC	IFNg_SL1344	ENSG00000134824	rs192793035	829	2.19546e-08	3.00555e-08	0.0518037	0.0700404	0.878156	9.73493e-08	2.71e-12	rs192793035	rs174548	0.948196	0.926133	TC	FADS2
featureCounts	TG	naive	ENSG00000134824	rs968567	831	9.26593e-06	4.35726e-05	0.0173544	0.0807063	0.901887	3.01509e-10	1.66e-09	rs61896141	rs174541	0.982593	0.917864	TG	FADS2
featureCounts	TG	naive	ENSG00000134824	rs192793035	829	9.26608e-06	4.35646e-05	0.0173546	0.0806913	0.901901	3.01509e-10	1.66e-09	rs61896141	rs174541	0.982593	0.917879	TG	FADS2
featureCounts	TG	IFNg	ENSG00000134824	rs968567	831	3.93995e-06	3.92304e-05	0.00737921	0.0725555	0.920022	1.90289e-11	1.66e-09	rs61896141	rs174541	0.992578	0.926902	TG	FADS2
featureCounts	TG	IFNg	ENSG00000134824	rs192793035	829	3.93996e-06	3.92295e-05	0.00737923	0.0725538	0.920024	1.90289e-11	1.66e-09	rs61896141	rs174541	0.992578	0.926904	TG	FADS2
featureCounts	TG	SL1344	ENSG00000134824	rs968567	831	5.00579e-05	3.30669e-05	0.0937545	0.0610867	0.845076	7.17998e-08	1.66e-09	rs192793035	rs174541	0.906162	0.932588	TG	FADS2
featureCounts	TG	SL1344	ENSG00000134824	rs192793035	829	5.00598e-05	3.30479e-05	0.0937581	0.061051	0.845108	7.17998e-08	1.66e-09	rs192793035	rs174541	0.906159	0.932627	TG	FADS2
featureCounts	TG	IFNg_SL1344	ENSG00000134824	rs968567	831	2.2419e-05	3.06982e-05	0.0419891	0.056594	0.901364	9.73493e-08	1.66e-09	rs192793035	rs174541	0.957958	0.940922	TG	FADS2
featureCounts	TG	IFNg_SL1344	ENSG00000134824	rs192793035	829	2.24193e-05	3.06917e-05	0.0419896	0.0565818	0.901375	9.73493e-08	1.66e-09	rs192793035	rs174541	0.957957	0.940935	TG	FADS2
featureCounts	TG	naive	ENSG00000089063	rs6053082	848	7.10773e-05	0.00156031	0.00289482	0.0626151	0.932859	2.07311e-09	5.04e-07	rs6053082	rs418062	0.995474	0.9371	TG	TMEM230
featureCounts	TG	naive	ENSG00000089063	rs7264441	897	7.10765e-05	0.00156056	0.00289481	0.0626258	0.932848	2.07311e-09	5.04e-07	rs6053082	rs418062	0.995474	0.937089	TG	TMEM230
featureCounts	TG	IFNg	ENSG00000089063	rs6053082	848	0.00654991	0.0018509	0.266763	0.0747326	0.650104	7.80678e-05	5.04e-07	rs7264441	rs418062	0.724836	0.896897	TG	TMEM230
featureCounts	TG	IFNg	ENSG00000089063	rs7264441	897	0.00654586	0.00186451	0.2666	0.0752882	0.649702	7.80678e-05	5.04e-07	rs7264441	rs418062	0.72499	0.896153	TG	TMEM230
featureCounts	TG	SL1344	ENSG00000089063	rs6053082	848	0.00100242	0.00168267	0.0408264	0.0676425	0.888846	6.98869e-07	5.04e-07	rs7264441	rs418062	0.956489	0.92928	TG	TMEM230
featureCounts	TG	SL1344	ENSG00000089063	rs7264441	897	0.00100226	0.00168638	0.0408199	0.0677942	0.888697	6.98869e-07	5.04e-07	rs7264441	rs418062	0.956491	0.929122	TG	TMEM230
featureCounts	TG	IFNg_SL1344	ENSG00000089063	rs6053082	848	0.0158355	0.0019372	0.644944	0.0786389	0.258645	0.00089313	5.04e-07	rs3729558	rs418062	0.337284	0.766846	TG	TMEM230
featureCounts	TG	IFNg_SL1344	ENSG00000089063	rs7264441	897	0.0157892	0.00200149	0.643062	0.081259	0.257888	0.00089313	5.04e-07	rs3729558	rs418062	0.339147	0.760402	TG	TMEM230
featureCounts	WBC	naive	ENSG00000115232	rs155127	1005	0.00116427	0.00026339	0.14872	0.0328277	0.817024	2.64328e-06	3.53e-08	rs155127	rs154962	0.849852	0.961372	WBC	ITGA4
featureCounts	WBC	naive	ENSG00000115232	rs155123	1015	0.00116412	0.000264339	0.148702	0.0329491	0.816921	2.64328e-06	3.53e-08	rs155127	rs154962	0.84987	0.96123	WBC	ITGA4
featureCounts	WBC	IFNg	ENSG00000115232	rs155127	1005	0.00403364	0.000598384	0.515246	0.0760318	0.40409	0.000319798	3.53e-08	rs155128	rs154962	0.480122	0.841641	WBC	ITGA4
featureCounts	WBC	IFNg	ENSG00000115232	rs155123	1015	0.00403311	0.000599316	0.51518	0.0761511	0.404037	0.000319798	3.53e-08	rs155128	rs154962	0.480188	0.841414	WBC	ITGA4
featureCounts	WBC	SL1344	ENSG00000115232	rs155127	1005	0.00232593	0.000496988	0.297107	0.0628467	0.637223	8.68224e-06	3.53e-08	rs155123	rs154962	0.70007	0.910228	WBC	ITGA4
featureCounts	WBC	SL1344	ENSG00000115232	rs155123	1015	0.002326	0.000496761	0.297117	0.0628178	0.637242	8.68224e-06	3.53e-08	rs155123	rs154962	0.70006	0.910268	WBC	ITGA4
featureCounts	WBC	IFNg_SL1344	ENSG00000115232	rs155127	1005	0.00614728	0.000565301	0.785236	0.072074	0.135977	0.00303259	3.53e-08	rs1449264	rs154962	0.208051	0.653576	WBC	ITGA4
featureCounts	WBC	IFNg_SL1344	ENSG00000115232	rs155123	1015	0.00614392	0.000569213	0.78481	0.072574	0.135903	0.00303259	3.53e-08	rs1449264	rs154962	0.208477	0.651885	WBC	ITGA4
featureCounts	WBC	naive	ENSG00000153814	rs2158799	882	3.16383e-08	3.92627e-07	0.000289768	0.00259887	0.997111	1.34653e-11	1.16e-10	rs2158799	rs2158799	0.99971	0.9974	WBC	JAZF1
featureCounts	WBC	naive	ENSG00000153814	rs544632	882	3.16383e-08	3.92627e-07	0.000289768	0.00259887	0.997111	1.34653e-11	1.16e-10	rs2158799	rs2158799	0.99971	0.9974	WBC	JAZF1
featureCounts	WBC	naive	ENSG00000153814	rs849139	818	3.16383e-08	3.92532e-07	0.000289768	0.002598	0.997112	1.34653e-11	1.16e-10	rs2158799	rs2158799	0.99971	0.997401	WBC	JAZF1
featureCounts	WBC	IFNg	ENSG00000153814	rs2158799	882	6.69153e-06	1.76724e-06	0.0612862	0.0152623	0.923443	1.91099e-06	1.16e-10	rs2158799	rs2158799	0.938705	0.983741	WBC	JAZF1
featureCounts	WBC	IFNg	ENSG00000153814	rs544632	882	6.69153e-06	1.76724e-06	0.0612862	0.0152623	0.923443	1.91099e-06	1.16e-10	rs2158799	rs2158799	0.938705	0.983741	WBC	JAZF1
featureCounts	WBC	IFNg	ENSG00000153814	rs849139	818	6.69305e-06	1.74287e-06	0.0613001	0.0150389	0.923653	1.91099e-06	1.16e-10	rs2158799	rs2158799	0.938691	0.983979	WBC	JAZF1
featureCounts	WBC	SL1344	ENSG00000153814	rs2158799	882	2.23364e-05	5.56416e-06	0.204574	0.0502157	0.745182	5.40784e-06	1.16e-10	rs12671650	rs2158799	0.795398	0.936867	WBC	JAZF1
featureCounts	WBC	SL1344	ENSG00000153814	rs544632	882	2.23364e-05	5.56416e-06	0.204574	0.0502157	0.745182	5.40784e-06	1.16e-10	rs12671650	rs2158799	0.795398	0.936867	WBC	JAZF1
featureCounts	WBC	SL1344	ENSG00000153814	rs849139	818	2.26959e-05	3.8967e-06	0.207867	0.0349318	0.757175	5.40784e-06	1.16e-10	rs12671650	rs2158799	0.792107	0.9559	WBC	JAZF1
featureCounts	WBC	IFNg_SL1344	ENSG00000153814	rs2158799	882	8.13381e-05	1.5419e-05	0.744958	0.141105	0.11384	5.36707e-06	1.16e-10	rs849139	rs2158799	0.254946	0.446527	WBC	JAZF1
featureCounts	WBC	IFNg_SL1344	ENSG00000153814	rs544632	882	8.13381e-05	1.5419e-05	0.744958	0.141105	0.11384	5.36707e-06	1.16e-10	rs849139	rs2158799	0.254946	0.446527	WBC	JAZF1
featureCounts	WBC	IFNg_SL1344	ENSG00000153814	rs849139	818	8.17247e-05	1.49735e-05	0.748497	0.137025	0.114381	5.36707e-06	1.16e-10	rs849139	rs2158799	0.251406	0.454966	WBC	JAZF1
featureCounts	WBC	naive	ENSG00000186470	rs28362606	1205	0.00261803	0.00386353	0.114511	0.168278	0.71073	1.59586e-09	6.97e-07	rs34605993	rs72843784	0.879008	0.808559	WBC	BTN3A2
featureCounts	WBC	IFNg	ENSG00000186470	rs28362606	1205	2.4041e-05	0.00786884	0.00105154	0.343531	0.647524	4.9806e-20	6.97e-07	rs67509210	rs72843784	0.991056	0.653368	WBC	BTN3A2
featureCounts	WBC	SL1344	ENSG00000186470	rs28362606	1205	0.000610152	0.00206131	0.0266877	0.089279	0.881362	8.13045e-13	6.97e-07	rs34605993	rs72843784	0.970641	0.908021	WBC	BTN3A2
featureCounts	WBC	IFNg_SL1344	ENSG00000186470	rs28362606	1205	0.00030385	0.00297702	0.0132902	0.129359	0.85407	1.354e-13	6.97e-07	rs34605993	rs72843784	0.983429	0.868461	WBC	BTN3A2
featureCounts	LDL	naive	ENSG00000134824	rs968567	831	7.21799e-10	3.39423e-09	0.0264819	0.12368	0.849838	3.01509e-10	1.27e-13	rs61896141	rs174548	0.973518	0.872956	LDL	FADS2
featureCounts	LDL	naive	ENSG00000134824	rs192793035	829	7.21817e-10	3.39364e-09	0.0264825	0.123658	0.849859	3.01509e-10	1.27e-13	rs61896141	rs174548	0.973517	0.872978	LDL	FADS2
featureCounts	LDL	IFNg	ENSG00000134824	rs968567	831	2.91009e-10	2.8976e-09	0.0106767	0.105425	0.883898	1.90289e-11	1.27e-13	rs61896141	rs174548	0.989323	0.893437	LDL	FADS2
featureCounts	LDL	IFNg	ENSG00000134824	rs192793035	829	2.91009e-10	2.89754e-09	0.0106768	0.105423	0.8839	1.90289e-11	1.27e-13	rs61896141	rs174548	0.989323	0.893439	LDL	FADS2
featureCounts	LDL	SL1344	ENSG00000134824	rs968567	831	3.72217e-09	2.45877e-09	0.136562	0.089435	0.774003	7.17998e-08	1.27e-13	rs192793035	rs174548	0.863438	0.89642	LDL	FADS2
featureCounts	LDL	SL1344	ENSG00000134824	rs192793035	829	3.72238e-09	2.4574e-09	0.136569	0.0893846	0.774046	7.17998e-08	1.27e-13	rs192793035	rs174548	0.863431	0.896477	LDL	FADS2
featureCounts	LDL	IFNg_SL1344	ENSG00000134824	rs968567	831	1.67843e-09	2.29826e-09	0.0615794	0.0834653	0.854955	9.73493e-08	1.27e-13	rs192793035	rs174548	0.938421	0.911058	LDL	FADS2
featureCounts	LDL	IFNg_SL1344	ENSG00000134824	rs192793035	829	1.67846e-09	2.29779e-09	0.0615806	0.0834479	0.854972	9.73493e-08	1.27e-13	rs192793035	rs174548	0.938419	0.911076	LDL	FADS2
featureCounts	CAD_2017	naive	ENSG00000182511	rs1894400	993	9.34934e-10	4.16072e-09	0.00397209	0.0166976	0.97933	1.23496e-09	6.279e-13	rs1894400	rs11330240	0.996028	0.983236	CAD	FES
featureCounts	CAD_2017	naive	ENSG00000182511	rs4932178	977	9.34941e-10	4.15918e-09	0.00397212	0.0166911	0.979337	1.23496e-09	6.279e-13	rs1894400	rs11330240	0.996028	0.983242	CAD	FES
featureCounts	CAD_2017	IFNg	ENSG00000182511	rs1894400	993	5.83703e-10	5.16038e-09	0.00247988	0.0209475	0.976573	3.38013e-10	6.279e-13	rs1894400	rs11330240	0.99752	0.979	CAD	FES
featureCounts	CAD_2017	IFNg	ENSG00000182511	rs4932178	977	5.83705e-10	5.15974e-09	0.00247989	0.0209447	0.976575	3.38013e-10	6.279e-13	rs1894400	rs11330240	0.99752	0.979003	CAD	FES
featureCounts	CAD_2017	SL1344	ENSG00000182511	rs1894400	993	1.54468e-07	1.58821e-08	0.656262	0.0671992	0.276539	0.00167848	6.279e-13	rs12906125	rs11330240	0.343738	0.804505	CAD	FES
featureCounts	CAD_2017	SL1344	ENSG00000182511	rs4932178	977	1.54624e-07	1.56604e-08	0.656925	0.0662568	0.276818	0.00167848	6.279e-13	rs12906125	rs11330240	0.343075	0.806874	CAD	FES
featureCounts	CAD_2017	IFNg_SL1344	ENSG00000182511	rs1894400	993	1.02243e-09	9.25005e-09	0.00434381	0.0383418	0.957314	2.49303e-10	6.279e-13	rs4932371	rs11330240	0.995656	0.961491	CAD	FES
featureCounts	CAD_2017	IFNg_SL1344	ENSG00000182511	rs4932178	977	1.02243e-09	9.24874e-09	0.00434383	0.0383362	0.95732	2.49303e-10	6.279e-13	rs4932371	rs11330240	0.995656	0.961497	CAD	FES
featureCounts	CAD_2017	naive	ENSG00000183386	rs11583126	626	3.72917e-05	0.00122217	0.00103336	0.0329019	0.964805	4.48499e-11	2.846e-07	rs11583126	rs11485595	0.997707	0.967022	CAD	FHL3
featureCounts	CAD_2017	naive	ENSG00000183386	rs4634868	611	3.73018e-05	0.00121494	0.00103259	0.0326669	0.965048	4.48499e-11	2.846e-07	rs11583126	rs11485595	0.997715	0.967258	CAD	FHL3
featureCounts	CAD_2017	naive	ENSG00000183386	rs28416760	625	3.72916e-05	0.00122227	0.00103335	0.0329042	0.964803	4.48499e-11	2.846e-07	rs11583126	rs11485595	0.997707	0.96702	CAD	FHL3
featureCounts	CAD_2017	IFNg	ENSG00000183386	rs11583126	626	0.000540653	0.00168141	0.0149816	0.0456551	0.937141	1.04575e-11	2.846e-07	rs4634868	rs11485595	0.982796	0.953546	CAD	FHL3
featureCounts	CAD_2017	IFNg	ENSG00000183386	rs4634868	611	0.00054168	0.00162388	0.0149948	0.0440132	0.938826	1.04575e-11	2.846e-07	rs4634868	rs11485595	0.98284	0.955218	CAD	FHL3
featureCounts	CAD_2017	IFNg	ENSG00000183386	rs28416760	625	0.000540596	0.00168493	0.0149799	0.0457522	0.937042	1.04575e-11	2.846e-07	rs4634868	rs11485595	0.982795	0.953447	CAD	FHL3
featureCounts	CAD_2017	SL1344	ENSG00000183386	rs11583126	626	0.0249049	0.00347041	0.690121	0.0959803	0.185523	6.34071e-07	2.846e-07	rs590954	rs11485595	0.281504	0.659044	CAD	FHL3
featureCounts	CAD_2017	SL1344	ENSG00000183386	rs4634868	611	0.0254577	0.00280774	0.704717	0.0775342	0.189483	1.71576e-06	2.846e-07	rs4634868	rs11485595	0.267017	0.709629	CAD	FHL3
featureCounts	CAD_2017	SL1344	ENSG00000183386	rs28416760	625	0.0248333	0.00356093	0.688128	0.098488	0.18499	6.34071e-07	2.846e-07	rs590954	rs11485595	0.283478	0.652572	CAD	FHL3
featureCounts	CAD_2017	IFNg_SL1344	ENSG00000183386	rs11583126	626	0.0270367	0.00240317	0.749192	0.0664373	0.15493	0.000120002	2.846e-07	rs28416760	rs11485595	0.221368	0.699878	CAD	FHL3
featureCounts	CAD_2017	IFNg_SL1344	ENSG00000183386	rs4634868	611	0.0272823	0.00214343	0.755227	0.0591782	0.156169	0.000120002	2.846e-07	rs28416760	rs11485595	0.215347	0.725196	CAD	FHL3
featureCounts	CAD_2017	IFNg_SL1344	ENSG00000183386	rs28416760	625	0.0270169	0.00242722	0.748636	0.0671032	0.154817	0.000120002	2.846e-07	rs28416760	rs11485595	0.22192	0.697624	CAD	FHL3
featureCounts	CAD_2017	naive	ENSG00000107798	rs1412445	881	1.70152e-14	4.54487e-14	0.0053991	0.0134401	0.981161	6.27912e-10	5.09e-16	rs1412445	rs2246942	0.994601	0.986487	CAD	LIPA
featureCounts	CAD_2017	IFNg	ENSG00000107798	rs1412445	881	7.42812e-13	9.43026e-14	0.235701	0.029188	0.735111	2.55826e-05	5.09e-16	rs1412445	rs2246942	0.764299	0.961811	CAD	LIPA
featureCounts	CAD_2017	SL1344	ENSG00000107798	rs1412445	881	5.42167e-16	3.14465e-14	0.000172035	0.00898742	0.990841	1.0352e-12	5.09e-16	rs1412445	rs2246942	0.999828	0.991011	CAD	LIPA
featureCounts	CAD_2017	IFNg_SL1344	ENSG00000107798	rs1412445	881	1.18865e-12	1.21493e-13	0.37717	0.037966	0.584864	9.13015e-05	5.09e-16	rs1412445	rs2246942	0.62283	0.939043	CAD	LIPA
featureCounts	CAD_2017	naive	ENSG00000130479	rs4808683	797	0.016553	0.00348884	0.624335	0.131365	0.224258	2.67677e-05	3.583e-07	rs4808683	rs73015715	0.355623	0.630605	CAD	MAP1S
featureCounts	CAD_2017	naive	ENSG00000130475	rs4808683	797	0.0147282	0.00205856	0.555508	0.0772932	0.350412	6.39727e-05	3.583e-07	rs4808683	rs73015715	0.427705	0.819284	CAD	FCHO1
featureCounts	CAD_2017	naive	ENSG00000130479	rs73013767	773	0.0165712	0.0034645	0.625015	0.130446	0.224503	2.67677e-05	3.583e-07	rs4808683	rs73015715	0.354949	0.632494	CAD	MAP1S
featureCounts	CAD_2017	naive	ENSG00000130475	rs56251816	797	0.0147281	0.00205871	0.555505	0.0772986	0.35041	6.39727e-05	3.583e-07	rs4808683	rs73015715	0.427708	0.819273	CAD	FCHO1
featureCounts	CAD_2017	naive	ENSG00000130479	rs10404176	773	0.0165711	0.00346455	0.625013	0.130448	0.224503	2.67677e-05	3.583e-07	rs4808683	rs73015715	0.354951	0.632491	CAD	MAP1S
featureCounts	CAD_2017	naive	ENSG00000130475	rs13345379	794	0.0147167	0.00207697	0.555078	0.0779881	0.35014	6.39727e-05	3.583e-07	rs4808683	rs73015715	0.428128	0.817839	CAD	FCHO1
featureCounts	CAD_2017	IFNg	ENSG00000130479	rs4808683	797	4.86299e-05	0.000981373	0.00183419	0.0360537	0.961082	1.1022e-11	3.583e-07	rs73013767	rs73015715	0.997136	0.963843	CAD	MAP1S
featureCounts	CAD_2017	IFNg	ENSG00000130475	rs4808683	797	0.000121153	0.000927639	0.00456957	0.0340277	0.960354	1.45563e-10	3.583e-07	rs7258073	rs73015715	0.994382	0.96578	CAD	FCHO1
featureCounts	CAD_2017	IFNg	ENSG00000130479	rs73013767	773	4.86301e-05	0.000981295	0.00183418	0.0360505	0.961085	1.1022e-11	3.583e-07	rs73013767	rs73015715	0.997136	0.963846	CAD	MAP1S
featureCounts	CAD_2017	IFNg	ENSG00000130475	rs56251816	797	0.000121153	0.000927638	0.00456957	0.0340277	0.960354	1.45563e-10	3.583e-07	rs7258073	rs73015715	0.994382	0.96578	CAD	FCHO1
featureCounts	CAD_2017	IFNg	ENSG00000130479	rs10404176	773	4.863e-05	0.00098131	0.00183418	0.036051	0.961085	1.1022e-11	3.583e-07	rs73013767	rs73015715	0.997136	0.963845	CAD	MAP1S
featureCounts	CAD_2017	IFNg	ENSG00000130475	rs13345379	794	0.000121153	0.000927633	0.0045696	0.0340277	0.960354	1.45563e-10	3.583e-07	rs7258073	rs73015715	0.994382	0.96578	CAD	FCHO1
featureCounts	CAD_2017	SL1344	ENSG00000130479	rs4808683	797	0.0155007	0.00332897	0.584646	0.125289	0.271236	3.84164e-06	3.583e-07	rs10404176	rs73015715	0.396524	0.684033	CAD	MAP1S
featureCounts	CAD_2017	SL1344	ENSG00000130475	rs4808683	797	0.0212267	0.00174412	0.800617	0.0656728	0.110739	0.00449707	3.583e-07	rs55889260	rs73015715	0.176412	0.62773	CAD	FCHO1
featureCounts	CAD_2017	SL1344	ENSG00000130479	rs73013767	773	0.015526	0.0032925	0.585593	0.123912	0.271677	3.84164e-06	3.583e-07	rs10404176	rs73015715	0.395588	0.686766	CAD	MAP1S
featureCounts	CAD_2017	SL1344	ENSG00000130475	rs56251816	797	0.021227	0.00174381	0.800628	0.0656611	0.11074	0.00449707	3.583e-07	rs55889260	rs73015715	0.176402	0.627775	CAD	FCHO1
featureCounts	CAD_2017	SL1344	ENSG00000130479	rs10404176	773	0.0155257	0.00329291	0.585582	0.123927	0.271672	3.84164e-06	3.583e-07	rs10404176	rs73015715	0.395599	0.686735	CAD	MAP1S
featureCounts	CAD_2017	SL1344	ENSG00000130475	rs13345379	794	0.0212129	0.00175968	0.8001	0.06626	0.110667	0.00449707	3.583e-07	rs55889260	rs73015715	0.176927	0.625496	CAD	FCHO1
featureCounts	CAD_2017	IFNg_SL1344	ENSG00000130479	rs4808683	797	0.0196729	0.00194087	0.742012	0.073041	0.163333	0.00262574	3.583e-07	rs265555	rs73015715	0.236374	0.690994	CAD	MAP1S
featureCounts	CAD_2017	IFNg_SL1344	ENSG00000130475	rs4808683	797	0.00875212	0.0129621	0.330107	0.488737	0.159442	3.77025e-10	3.583e-07	rs13345379	rs73015715	0.648179	0.245985	CAD	FCHO1
featureCounts	CAD_2017	IFNg_SL1344	ENSG00000130479	rs73013767	773	0.0196878	0.00192304	0.742565	0.0723679	0.163456	0.00262574	3.583e-07	rs265555	rs73015715	0.235824	0.693128	CAD	MAP1S
featureCounts	CAD_2017	IFNg_SL1344	ENSG00000130475	rs56251816	797	0.00875213	0.0129621	0.330108	0.488736	0.159443	3.77025e-10	3.583e-07	rs13345379	rs73015715	0.648178	0.245986	CAD	FCHO1
featureCounts	CAD_2017	IFNg_SL1344	ENSG00000130479	rs10404176	773	0.0196938	0.00191582	0.742789	0.0720954	0.163506	0.00262574	3.583e-07	rs265555	rs73015715	0.235601	0.693994	CAD	MAP1S
featureCounts	CAD_2017	IFNg_SL1344	ENSG00000130475	rs13345379	794	0.0087514	0.012963	0.330081	0.488775	0.15943	3.77025e-10	3.583e-07	rs13345379	rs73015715	0.648204	0.245956	CAD	FCHO1
txrevise_promoters	AD	naive	ENSG00000105383.grp_2.upstream.ENST00000600557	rs12459419	802	6.62886e-05	6.94629e-05	0.00313921	0.0022951	0.99443	3.50221e-10	5.12e-08	rs3865444	rs3865444	0.996725	0.997697	AD	CD33
txrevise_promoters	AD	naive	ENSG00000105383.grp_2.upstream.ENST00000600557	rs7245846	809	6.62885e-05	6.94989e-05	0.00313921	0.00229682	0.994428	3.50221e-10	5.12e-08	rs3865444	rs3865444	0.996725	0.997696	AD	CD33
txrevise_promoters	AD	IFNg	ENSG00000105383.grp_2.upstream.ENST00000600557	rs12459419	802	0.0017961	0.000271176	0.0850574	0.011941	0.900934	5.22192e-07	5.12e-08	rs7245846	rs3865444	0.912875	0.986919	AD	CD33
txrevise_promoters	AD	IFNg	ENSG00000105383.grp_2.upstream.ENST00000600557	rs7245846	809	0.00179601	0.000272156	0.0850534	0.0119875	0.900891	5.22192e-07	5.12e-08	rs7245846	rs3865444	0.912878	0.986868	AD	CD33
txrevise_promoters	AD	SL1344	ENSG00000105383.grp_2.upstream.ENST00000600557	rs12459419	802	0.0161835	0.0016144	0.766399	0.0763132	0.13949	0.00304983	5.12e-08	rs1875421	rs3865444	0.215803	0.646375	AD	CD33
txrevise_promoters	AD	SL1344	ENSG00000105383.grp_2.upstream.ENST00000600557	rs7245846	809	0.016176	0.00162326	0.766043	0.0767332	0.139425	0.00304983	5.12e-08	rs1875421	rs3865444	0.216158	0.645013	AD	CD33
txrevise_promoters	AD	IFNg_SL1344	ENSG00000105383.grp_2.upstream.ENST00000600557	rs12459419	802	0.0143226	0.00126476	0.678272	0.0596482	0.246492	0.00238546	5.12e-08	rs2459147	rs3865444	0.30614	0.805161	AD	CD33
txrevise_promoters	AD	IFNg_SL1344	ENSG00000105383.grp_2.upstream.ENST00000600557	rs7245846	809	0.0143156	0.00127427	0.67794	0.0600991	0.246371	0.00238546	5.12e-08	rs2459147	rs3865444	0.30647	0.803899	AD	CD33
txrevise_promoters	AD	naive	ENSG00000136717.grp_1.upstream.ENST00000357970	rs11680911	1058	2.91944e-21	1.87104e-21	0.195512	0.124622	0.679867	1.34826e-08	1.001e-26	rs11680911	rs4663105	0.804488	0.845092	AD	BIN1
txrevise_promoters	AD	naive	ENSG00000136717.grp_2.upstream.ENST00000259238	rs873270	1053	2.24772e-21	1.19575e-21	0.150528	0.0793082	0.770164	2.27052e-08	1.001e-26	rs35114168	rs4663105	0.849472	0.906638	AD	BIN1
txrevise_promoters	AD	IFNg	ENSG00000136717.grp_1.upstream.ENST00000357970	rs11680911	1058	1.41911e-21	7.74258e-22	0.095036	0.0509973	0.853967	8.54207e-08	1.001e-26	rs35114168	rs4663105	0.904964	0.943647	AD	BIN1
txrevise_promoters	AD	IFNg	ENSG00000136717.grp_2.upstream.ENST00000259238	rs873270	1053	2.23753e-21	1.73849e-21	0.149845	0.115691	0.734465	2.69247e-08	1.001e-26	rs873270	rs4663105	0.850155	0.863918	AD	BIN1
txrevise_promoters	AD	SL1344	ENSG00000136717.grp_1.upstream.ENST00000357970	rs11680911	1058	1.23592e-20	1.61178e-21	0.827681	0.107875	0.064444	6.12201e-05	1.001e-26	rs4150416	rs4663105	0.172319	0.373981	AD	BIN1
txrevise_promoters	AD	SL1344	ENSG00000136717.grp_2.upstream.ENST00000259238	rs873270	1053	1.25113e-20	1.4204e-21	0.837871	0.0950558	0.0670736	0.000659207	1.001e-26	rs4150416	rs4663105	0.162129	0.413704	AD	BIN1
txrevise_promoters	AD	IFNg_SL1344	ENSG00000136717.grp_1.upstream.ENST00000357970	rs11680911	1058	1.27475e-20	1.25143e-21	0.853686	0.0837445	0.0625695	0.00595936	1.001e-26	rs183249941	rs4663105	0.146314	0.427639	AD	BIN1
txrevise_promoters	AD	IFNg_SL1344	ENSG00000136717.grp_2.upstream.ENST00000259238	rs873270	1053	1.27609e-20	1.24876e-21	0.854582	0.0835664	0.0618517	0.00694549	1.001e-26	rs183249941	rs4663105	0.145418	0.425337	AD	BIN1
txrevise_promoters	CEL	naive	ENSG00000111321.grp_1.upstream.ENST00000228918	rs12354	82	0.0433219	0.000725919	0.468781	0.00737529	0.479796	2.31746e-05	5.765e-07	rs10849448	rs10774430	0.487171	0.984861	CEL	LTBR
txrevise_promoters	CEL	IFNg	ENSG00000111321.grp_1.upstream.ENST00000228918	rs12354	82	0.0195776	0.000772334	0.211847	0.00759714	0.760206	6.78861e-06	5.765e-07	rs10774430	rs10774430	0.767803	0.990105	CEL	LTBR
txrevise_promoters	CEL	SL1344	ENSG00000111321.grp_1.upstream.ENST00000228918	rs12354	82	0.0102967	0.000912327	0.11142	0.00900382	0.868368	5.58247e-07	5.765e-07	rs12354	rs10774430	0.877371	0.989738	CEL	LTBR
txrevise_promoters	CEL	IFNg_SL1344	ENSG00000111321.grp_1.upstream.ENST00000228918	rs12354	82	0.0765867	0.000582511	0.828737	0.00621541	0.0878788	0.00505613	5.765e-07	rs10849480	rs10774430	0.0940942	0.933945	CEL	LTBR
txrevise_promoters	CEL	naive	ENSG00000157873.grp_2.upstream.ENST00000409119	rs2227312	129	9.30276e-08	6.6086e-07	0.0875728	0.621819	0.290608	1.85189e-10	5.423e-12	rs2227312	rs4445406	0.912426	0.3185	CEL	TNFRSF14
txrevise_promoters	CEL	naive	ENSG00000157873.grp_1.upstream.ENST00000409119	rs1886730	129	1.03452e-07	4.75125e-07	0.0973857	0.44681	0.455804	9.40066e-10	5.423e-12	rs2227312	rs4445406	0.902614	0.504982	CEL	TNFRSF14
txrevise_promoters	CEL	naive	ENSG00000157873.grp_1.upstream.ENST00000409119	rs881640	133	1.03184e-07	4.75651e-07	0.0972006	0.447616	0.455183	9.40066e-10	5.423e-12	rs2227312	rs4445406	0.902799	0.504191	CEL	TNFRSF14
txrevise_promoters	CEL	IFNg	ENSG00000157873.grp_2.upstream.ENST00000409119	rs2227312	129	1.94848e-07	6.34101e-08	0.183423	0.0589344	0.757642	7.64635e-07	5.423e-12	rs200003877	rs4445406	0.816577	0.927828	CEL	TNFRSF14
txrevise_promoters	CEL	IFNg	ENSG00000157873.grp_1.upstream.ENST00000409119	rs1886730	129	2.68382e-08	4.48345e-08	0.0252645	0.0412721	0.933463	1.5852e-08	5.423e-12	rs1886730	rs4445406	0.974735	0.957658	CEL	TNFRSF14
txrevise_promoters	CEL	IFNg	ENSG00000157873.grp_1.upstream.ENST00000409119	rs881640	133	2.68195e-08	4.53284e-08	0.0252644	0.0417671	0.932968	1.5852e-08	5.423e-12	rs1886730	rs4445406	0.974736	0.95715	CEL	TNFRSF14
txrevise_promoters	CEL	SL1344	ENSG00000157873.grp_2.upstream.ENST00000409119	rs2227312	129	9.57244e-07	1.40447e-08	0.901114	0.0131354	0.0857492	0.0129179	5.423e-12	rs140073157	rs4445406	0.0988846	0.867164	CEL	TNFRSF14
txrevise_promoters	CEL	SL1344	ENSG00000157873.grp_1.upstream.ENST00000409119	rs1886730	129	8.75337e-07	1.82746e-08	0.82401	0.0170441	0.158945	0.00438148	5.423e-12	rs138680782	rs4445406	0.175989	0.903152	CEL	TNFRSF14
txrevise_promoters	CEL	SL1344	ENSG00000157873.grp_1.upstream.ENST00000409119	rs881640	133	8.74367e-07	1.87097e-08	0.823668	0.017466	0.158865	0.00438148	5.423e-12	rs138680782	rs4445406	0.176331	0.900948	CEL	TNFRSF14
txrevise_promoters	CEL	IFNg_SL1344	ENSG00000157873.grp_2.upstream.ENST00000409119	rs2227312	129	8.29026e-07	2.44236e-08	0.780414	0.0227947	0.19679	0.000755498	5.423e-12	rs881640	rs4445406	0.219585	0.896192	CEL	TNFRSF14
txrevise_promoters	CEL	IFNg_SL1344	ENSG00000157873.grp_1.upstream.ENST00000409119	rs1886730	129	3.7496e-07	5.90978e-08	0.352974	0.0550405	0.591985	4.64981e-06	5.423e-12	rs881640	rs4445406	0.647026	0.914933	CEL	TNFRSF14
txrevise_promoters	CEL	IFNg_SL1344	ENSG00000157873.grp_1.upstream.ENST00000409119	rs881640	133	3.73497e-07	6.17379e-08	0.35184	0.0575675	0.590592	4.64981e-06	5.423e-12	rs881640	rs4445406	0.648159	0.911183	CEL	TNFRSF14
txrevise_promoters	CD	naive	ENSG00000107968.grp_1.upstream.ENST00000413724	rs1537705	1229	0.0199198	0.00254087	0.797007	0.101583	0.0789492	0.00875607	2.527e-07	rs2480285	rs10826797	0.180533	0.437313	IBD	MAP3K8
txrevise_promoters	CD	naive	ENSG00000107968.grp_1.upstream.ENST00000413724	rs200743743	1257	0.0187648	0.00244627	0.796764	0.103792	0.078233	0.00875607	2.527e-07	rs2480285	rs10826797	0.182025	0.429793	IBD	MAP3K8
txrevise_promoters	CD	IFNg	ENSG00000107968.grp_1.upstream.ENST00000413724	rs1537705	1229	0.0182087	0.00276344	0.728544	0.110428	0.140056	0.000349135	2.527e-07	rs598009	rs10826797	0.250484	0.559142	IBD	MAP3K8
txrevise_promoters	CD	IFNg	ENSG00000107968.grp_1.upstream.ENST00000413724	rs200743743	1257	0.0171609	0.00269467	0.728663	0.11428	0.137202	0.000349135	2.527e-07	rs598009	rs10826797	0.251481	0.545573	IBD	MAP3K8
txrevise_promoters	CD	SL1344	ENSG00000107968.grp_1.upstream.ENST00000413724	rs1537705	1229	1.43782e-05	0.000838713	0.000575284	0.0325916	0.96598	2.49144e-12	2.527e-07	rs1537705	rs10826797	0.998572	0.967362	IBD	MAP3K8
txrevise_promoters	CD	SL1344	ENSG00000107968.grp_1.upstream.ENST00000413724	rs200743743	1257	1.43481e-05	0.000837039	0.00060923	0.0345772	0.963962	2.49144e-12	2.527e-07	rs1537705	rs10826797	0.998539	0.965372	IBD	MAP3K8
txrevise_promoters	CD	IFNg_SL1344	ENSG00000107968.grp_1.upstream.ENST00000413724	rs1537705	1229	7.71458e-05	0.0008438	0.00308667	0.032798	0.963194	1.17308e-10	2.527e-07	rs200743743	rs10826797	0.995992	0.96707	IBD	MAP3K8
[truncated: 349 more rows]

## Sheet: acLDL study
annotation	trait	condition_name	phenotype_id	snp_id	nsnps	PP.H0.abf	PP.H1.abf	PP.H2.abf	PP.H3.abf	PP.H4.abf	qtl_pval	gwas_pval	qtl_lead	gwas_lead	PP3+PP4	PP4/(PP3+PP4)	summarised_trait	gene_name
Ensembl_87	AD	Ctrl	ENST00000421133	rs12459419	810	8.1256e-06	9.02196e-05	0.000384807	0.00327632	0.996241	4.12231e-13	5.12e-08	rs3865444	rs3865444	0.999517	0.996722	AD	CD33
Ensembl_87	AD	AcLDL	ENST00000421133	rs12459419	810	8.08207e-05	9.95547e-05	0.00382745	0.00372238	0.99227	1.40092e-10	5.12e-08	rs3865444	rs3865444	0.995992	0.996263	AD	CD33
Ensembl_87	CEL	Ctrl	ENST00000400377	rs3746963	133	3.61463e-06	0.015451	4.28306e-05	0.18228	0.802223	3.06283e-19	6.162e-07	rs3746963	rs58911644	0.984503	0.814851	CEL	ICOSLG
Ensembl_87	CEL	AcLDL	ENST00000400377	rs3746963	133	0.00248442	0.006159	0.0294384	0.0720896	0.889829	2.2565e-11	6.162e-07	rs59307670	rs58911644	0.961918	0.925056	CEL	ICOSLG
Ensembl_87	CEL	Ctrl	ENST00000338639	rs17523802	362	0.00349103	0.00187596	0.0725498	0.0381019	0.883981	5.96666e-11	6.207e-07	rs17523802	rs9658012	0.922083	0.958678	CEL	PARK7
Ensembl_87	CEL	AcLDL	ENST00000338639	rs17523802	362	0.0168718	0.0018742	0.350626	0.038357	0.592271	1.90141e-07	6.207e-07	rs17523802	rs9658012	0.630628	0.939176	CEL	PARK7
Ensembl_87	CD	Ctrl	ENST00000419783	rs62259939	490	3.22639e-13	1.55435e-09	1.97035e-05	0.0940175	0.905963	7.47432e-16	4.805e-13	rs35904956	rs13096760	0.99998	0.905981	IBD	GPX1
Ensembl_87	CD	Ctrl	ENST00000620890	rs62259939	490	7.64879e-13	1.55877e-09	4.67109e-05	0.0942879	0.905665	4.28585e-15	4.805e-13	rs35904956	rs13096760	0.999953	0.905708	IBD	GPX1
Ensembl_87	CD	AcLDL	ENST00000419783	rs62259939	490	2.32922e-11	1.58797e-09	0.00142245	0.0960742	0.902503	2.66643e-12	4.805e-13	rs62259939	rs13096760	0.998578	0.903789	IBD	GPX1
Ensembl_87	CD	AcLDL	ENST00000620890	rs62259939	490	2.01162e-11	1.58201e-09	0.00122849	0.09571	0.903062	2.1657e-12	4.805e-13	rs62259939	rs13096760	0.998772	0.904172	IBD	GPX1
Ensembl_87	CD	Ctrl	ENST00000325686	rs61959998	904	0.000285861	6.23557e-05	0.320702	0.0693462	0.609603	4.06081e-06	6.021e-09	rs137990324	rs1932990	0.678949	0.897863	IBD	LACC1
Ensembl_87	CD	AcLDL	ENST00000325686	rs61959998	904	5.03215e-05	3.68346e-05	0.0564549	0.0404211	0.903037	1.71497e-08	6.021e-09	rs137990324	rs1932990	0.943458	0.957156	IBD	LACC1
Ensembl_87	CD	Ctrl	ENST00000564831	rs40836	368	2.24918e-11	2.21817e-06	1.12414e-06	0.109974	0.890023	3.21043e-19	4.686e-10	rs40836	rs3020803	0.999997	0.890026	IBD	APOBR
Ensembl_87	CD	Ctrl	ENST00000564831	rs40831	370	2.24918e-11	2.21817e-06	1.12414e-06	0.109974	0.890023	3.21043e-19	4.686e-10	rs40836	rs3020803	0.999997	0.890026	IBD	APOBR
Ensembl_87	CD	AcLDL	ENST00000564831	rs40836	368	2.08596e-11	1.69273e-06	1.04256e-06	0.0836863	0.916311	1.96472e-19	4.686e-10	rs34835	rs3020803	0.999997	0.916313	IBD	APOBR
Ensembl_87	CD	AcLDL	ENST00000564831	rs40831	370	2.08596e-11	1.69273e-06	1.04256e-06	0.0836863	0.916311	1.96472e-19	4.686e-10	rs34835	rs3020803	0.999997	0.916313	IBD	APOBR
Ensembl_87	IBD	Ctrl	ENST00000564831	rs40836	368	1.01371e-11	9.99735e-07	6.85247e-07	0.0666467	0.933352	3.21043e-19	2.783e-10	rs40836	rs12446550	0.999998	0.933353	IBD	APOBR
Ensembl_87	IBD	Ctrl	ENST00000564831	rs40831	370	1.01371e-11	9.99735e-07	6.85247e-07	0.0666467	0.933352	3.21043e-19	2.783e-10	rs40836	rs12446550	0.999998	0.933353	IBD	APOBR
Ensembl_87	IBD	AcLDL	ENST00000564831	rs40836	368	8.33679e-12	6.76521e-07	5.6355e-07	0.0447763	0.955222	1.96472e-19	2.783e-10	rs34835	rs12446550	0.999999	0.955224	IBD	APOBR
Ensembl_87	IBD	AcLDL	ENST00000564831	rs40831	370	8.33679e-12	6.76521e-07	5.6355e-07	0.0447763	0.955222	1.96472e-19	2.783e-10	rs34835	rs12446550	0.999999	0.955224	IBD	APOBR
Ensembl_87	IBD	Ctrl	ENST00000238936	rs5870	686	0.000136908	0.00325329	0.00372837	0.0876904	0.905191	2.07802e-10	9.37e-07	rs5870	rs12572775	0.992881	0.911681	IBD	MFSD13A
Ensembl_87	IBD	Ctrl	ENST00000238936	rs715440	686	0.000136916	0.00325846	0.00372052	0.0876392	0.905245	2.07802e-10	9.37e-07	rs5870	rs12572775	0.992884	0.911733	IBD	MFSD13A
Ensembl_87	IBD	AcLDL	ENST00000238936	rs5870	686	0.000647286	0.00431493	0.0176273	0.116646	0.860764	7.24203e-09	9.37e-07	rs715440	rs12572775	0.97741	0.880658	IBD	MFSD13A
Ensembl_87	IBD	AcLDL	ENST00000238936	rs715440	686	0.000647315	0.00432395	0.0175899	0.116637	0.860802	7.24203e-09	9.37e-07	rs715440	rs12572775	0.977439	0.880671	IBD	MFSD13A
Ensembl_87	IBD	Ctrl	ENST00000566946	rs187668816	314	2.06295e-10	3.849e-06	6.6607e-06	0.123397	0.876592	2.40264e-17	3.858e-10	rs187668816	rs147684209	0.999989	0.876602	IBD	ATXN2L
Ensembl_87	IBD	AcLDL	ENST00000566946	rs187668816	314	5.1934e-09	2.79405e-06	0.000167681	0.0893018	0.910528	2.87406e-14	3.858e-10	rs187668816	rs147684209	0.99983	0.910683	IBD	ATXN2L
Ensembl_87	IBD	Ctrl	ENST00000409119	rs2227312	673	0.00239224	0.000225135	0.699863	0.0656327	0.231887	0.00212963	3.084e-08	rs1886730	rs1886731	0.29752	0.779401	IBD	TNFRSF14
Ensembl_87	IBD	AcLDL	ENST00000409119	rs2227312	673	3.60958e-05	0.000230159	0.01056	0.0664117	0.922762	2.20915e-10	3.084e-08	rs2227312	rs1886731	0.989174	0.932861	IBD	TNFRSF14
Ensembl_87	IBD	Ctrl	ENST00000302631	rs61012301	417	0.000206344	0.00169493	0.0104881	0.085248	0.902363	5.27093e-11	6.915e-07	rs61012301	rs734073	0.987611	0.913683	IBD	SCAMP3
Ensembl_87	IBD	Ctrl	ENST00000302631	rs11264345	420	0.000206519	0.00168648	0.0104747	0.0846359	0.902996	5.27093e-11	6.915e-07	rs61012301	rs734073	0.987632	0.914304	IBD	SCAMP3
Ensembl_87	IBD	AcLDL	ENST00000302631	rs61012301	417	8.75686e-05	0.00344112	0.00445096	0.174089	0.817932	4.36452e-12	6.915e-07	rs12407919	rs734073	0.99202	0.824511	IBD	SCAMP3
Ensembl_87	IBD	AcLDL	ENST00000302631	rs11264345	420	8.76822e-05	0.00343137	0.00444726	0.173221	0.818812	4.36452e-12	6.915e-07	rs12407919	rs734073	0.992034	0.825388	IBD	SCAMP3
Ensembl_87	UC	Ctrl	ENST00000238936	rs5870	686	0.000175516	0.00417069	0.00319212	0.0749353	0.917526	2.07802e-10	9.996e-07	rs5870	rs11591780	0.992462	0.924496	IBD	MFSD13A
Ensembl_87	UC	Ctrl	ENST00000238936	rs715440	686	0.000175512	0.00417699	0.00318794	0.0749522	0.917507	2.07802e-10	9.996e-07	rs5870	rs11591780	0.99246	0.924478	IBD	MFSD13A
Ensembl_87	UC	AcLDL	ENST00000238936	rs5870	686	0.000840115	0.00560037	0.0152793	0.100977	0.877303	7.24203e-09	9.996e-07	rs715440	rs11591780	0.97828	0.896781	IBD	MFSD13A
Ensembl_87	UC	AcLDL	ENST00000238936	rs715440	686	0.000840058	0.00561143	0.0152586	0.101047	0.877243	7.24203e-09	9.996e-07	rs715440	rs11591780	0.97829	0.89671	IBD	MFSD13A
Ensembl_87	UC	Ctrl	ENST00000409119	rs2227312	673	1.61674e-05	1.52152e-06	0.696433	0.0653036	0.238246	0.00212963	2.254e-10	rs1886730	rs1886731	0.303549	0.784867	IBD	TNFRSF14
Ensembl_87	UC	AcLDL	ENST00000409119	rs2227312	673	1.97892e-07	1.26183e-06	0.00852451	0.0534173	0.938057	2.20915e-10	2.254e-10	rs2227312	rs1886731	0.991474	0.946123	IBD	TNFRSF14
Ensembl_87	RA	Ctrl	ENST00000510546	rs267962	983	0.000177012	0.00355539	0.00374176	0.074237	0.918289	1.86936e-13	9.3e-07	rs267962	rs267949	0.992526	0.925204	RA	DAP
Ensembl_87	RA	Ctrl	ENST00000510546	rs1080440	995	0.000177011	0.00355557	0.00374179	0.0742421	0.918284	1.86936e-13	9.3e-07	rs267962	rs267949	0.992526	0.925199	RA	DAP
Ensembl_87	RA	AcLDL	ENST00000510546	rs267962	983	0.000578448	0.00476511	0.0122275	0.0998445	0.882584	1.29429e-12	9.3e-07	rs1080440	rs267949	0.982429	0.89837	RA	DAP
Ensembl_87	RA	AcLDL	ENST00000510546	rs1080440	995	0.000578438	0.00476576	0.0122274	0.0998595	0.882569	1.29429e-12	9.3e-07	rs1080440	rs267949	0.982428	0.898354	RA	DAP
Ensembl_87	RA	Ctrl	ENST00000470364	rs140670679	651	1.90424e-07	9.43177e-05	8.29377e-05	0.0401197	0.959703	1.63072e-15	5.2e-09	rs2306627	rs28411352	0.999823	0.959873	RA	INPP5B
Ensembl_87	RA	Ctrl	ENST00000470364	rs28411352	728	1.90424e-07	9.4319e-05	8.29384e-05	0.0401206	0.959702	1.63072e-15	5.2e-09	rs2306627	rs28411352	0.999823	0.959872	RA	INPP5B
Ensembl_87	RA	AcLDL	ENST00000470364	rs140670679	651	1.43151e-05	5.93445e-05	0.00623482	0.0248783	0.968813	2.09848e-10	5.2e-09	rs28411352	rs28411352	0.993692	0.974964	RA	INPP5B
Ensembl_87	RA	AcLDL	ENST00000470364	rs28411352	728	1.43145e-05	5.94369e-05	0.00623462	0.0249188	0.968773	2.09848e-10	5.2e-09	rs28411352	rs28411352	0.993692	0.974923	RA	INPP5B
Ensembl_87	RA	Ctrl	ENST00000471026	rs10494360	655	7.15934e-06	0.000341088	0.0011203	0.0524278	0.946104	1.18813e-17	9.8e-08	rs12722986	rs4657041	0.998531	0.947495	RA	FCGR2A
Ensembl_87	RA	AcLDL	ENST00000471026	rs10494360	655	6.77866e-05	0.000399356	0.0106073	0.0615643	0.927361	5.13904e-14	9.8e-08	rs12722986	rs4657041	0.988926	0.937746	RA	FCGR2A
Ensembl_87	RA	Ctrl	ENST00000356464	rs7312770	264	5.82032e-05	0.000374018	0.00397485	0.0245716	0.971021	1.33017e-11	8.5e-08	rs7312770	rs773125	0.995593	0.97532	RA	RPS26
Ensembl_87	RA	Ctrl	ENST00000552361	rs1131017	266	0.00019206	0.00047084	0.0131163	0.0311998	0.955021	2.7277e-09	8.5e-08	rs7312770	rs773125	0.986221	0.968364	RA	RPS26
Ensembl_87	RA	AcLDL	ENST00000356464	rs7312770	264	2.18749e-05	0.000421762	0.00149389	0.027833	0.97023	5.41498e-12	8.5e-08	rs1131017	rs773125	0.998062	0.972113	RA	RPS26
Ensembl_87	RA	AcLDL	ENST00000552361	rs1131017	266	1.23365e-05	0.000284323	0.000842491	0.0184367	0.980424	2.92154e-12	8.5e-08	rs1131017	rs773125	0.998861	0.981542	RA	RPS26
Ensembl_87	SCZ	Ctrl	ENST00000440963	rs10431750	824	6.57479e-09	3.59939e-09	0.233918	0.12742	0.638662	1.8472e-05	1.172e-13	rs67899457	rs12887734	0.766082	0.833673	SCZ	APOPT1
Ensembl_87	SCZ	AcLDL	ENST00000440963	rs10431750	824	6.91094e-10	1.501e-09	0.0245877	0.0524797	0.922933	1.66089e-08	1.172e-13	rs10431750	rs12887734	0.975412	0.946197	SCZ	APOPT1
Ensembl_87	SCZ	Ctrl	ENST00000491607	rs7639267	523	9.13597e-06	5.13859e-06	0.122464	0.0680715	0.80945	3.58412e-07	1.179e-10	rs67409736	rs139364760	0.877521	0.922428	SCZ	SMIM4
Ensembl_87	SCZ	AcLDL	ENST00000491607	rs7639267	523	6.38338e-05	3.48508e-06	0.855669	0.0466186	0.0976452	0.00190218	1.179e-10	rs62253734	rs139364760	0.144264	0.676852	SCZ	SMIM4
Ensembl_87	SCZ	Ctrl	ENST00000289577	rs151027659;rs35408903	638	0.0060688	0.00892537	0.0459008	0.0666337	0.872471	8.77731e-08	7.072e-07	rs151027659;rs35408903	rs540425	0.939105	0.929046	SCZ	TMED4
Ensembl_87	SCZ	Ctrl	ENST00000289577	rs217362	605	0.00607116	0.00891149	0.0458264	0.066393	0.872798	8.77731e-08	7.072e-07	rs151027659;rs35408903	rs540425	0.939191	0.929308	SCZ	TMED4
Ensembl_87	SCZ	AcLDL	ENST00000289577	rs151027659;rs35408903	638	2.29796e-05	0.00815247	0.000173804	0.0607295	0.930921	1.6118e-13	7.072e-07	rs217397	rs540425	0.991651	0.938759	SCZ	TMED4
Ensembl_87	SCZ	AcLDL	ENST00000289577	rs217362	605	2.29825e-05	0.00815341	0.000173477	0.0606126	0.931038	1.6118e-13	7.072e-07	rs217397	rs540425	0.99165	0.938877	SCZ	TMED4
Ensembl_87	SCZ	Ctrl	ENST00000420189	rs1996719	634	0.0160837	0.010207	0.0804507	0.0502123	0.843046	5.94497e-07	9.505e-07	rs1996719	rs6707588	0.893259	0.943787	SCZ	FAM134A
Ensembl_87	SCZ	Ctrl	ENST00000420189	rs13419988	634	0.0160837	0.010207	0.0804507	0.0502123	0.843046	5.94497e-07	9.505e-07	rs1996719	rs6707588	0.893259	0.943787	SCZ	FAM134A
Ensembl_87	SCZ	AcLDL	ENST00000420189	rs1996719	634	0.0137158	0.00885239	0.0686064	0.0434143	0.865411	2.25723e-07	9.505e-07	rs13419988	rs6707588	0.908826	0.95223	SCZ	FAM134A
Ensembl_87	SCZ	AcLDL	ENST00000420189	rs13419988	634	0.0137158	0.00885239	0.0686064	0.0434143	0.865411	2.25723e-07	9.505e-07	rs13419988	rs6707588	0.908826	0.95223	SCZ	FAM134A
Ensembl_87	CAD	Ctrl	ENST00000524817	rs34552339	1073	0.000472455	0.000200093	0.177686	0.0745063	0.747135	2.50409e-07	1.28e-08	rs34552339	rs10840293	0.821641	0.90932	CAD	SWAP70
Ensembl_87	CAD	Ctrl	ENST00000447399	rs12360647	1026	0.00170346	0.000199005	0.640654	0.0745607	0.282883	0.000516393	1.28e-08	rs76803283	rs10840293	0.357444	0.791406	CAD	SWAP70
Ensembl_87	CAD	AcLDL	ENST00000524817	rs34552339	1073	0.00165976	0.000244781	0.62422	0.0917778	0.282097	3.15325e-05	1.28e-08	rs10734649	rs10840293	0.373875	0.754523	CAD	SWAP70
Ensembl_87	CAD	AcLDL	ENST00000447399	rs12360647	1026	0.000173812	7.27617e-05	0.0653688	0.0264569	0.907928	5.89919e-07	1.28e-08	rs12360647	rs10840293	0.934385	0.971685	CAD	SWAP70
Ensembl_87	CAD	Ctrl	ENST00000456827	rs1332329	916	3.14476e-07	4.35457e-08	0.246392	0.0333979	0.720209	1.3911e-05	5.15e-12	rs2246833	rs1412444	0.753607	0.955683	CAD	LIPA
Ensembl_87	CAD	AcLDL	ENST00000456827	rs1332329	916	9.01052e-08	2.66869e-08	0.0705975	0.0199998	0.909403	2.00222e-07	5.15e-12	rs1332329	rs1412444	0.929402	0.978481	CAD	LIPA
Ensembl_87	CAD	Ctrl	ENST00000452243	rs145583381	1062	2.30801e-07	0.000209783	2.74726e-05	0.023995	0.975768	7.87673e-17	5.01e-08	rs145583381	rs2521501	0.999763	0.975999	CAD	FES
Ensembl_87	CAD	Ctrl	ENST00000452243	rs12906125	1055	2.30801e-07	0.000209783	2.74725e-05	0.0239949	0.975768	7.87673e-17	5.01e-08	rs145583381	rs2521501	0.999763	0.975999	CAD	FES
Ensembl_87	CAD	AcLDL	ENST00000452243	rs145583381	1062	4.02861e-06	0.000188354	0.000479531	0.0214422	0.977886	1.7524e-13	5.01e-08	rs6227	rs2521501	0.999328	0.978543	CAD	FES
Ensembl_87	CAD	AcLDL	ENST00000452243	rs12906125	1055	4.02861e-06	0.000188356	0.00047953	0.0214423	0.977886	1.7524e-13	5.01e-08	rs6227	rs2521501	0.999328	0.978543	CAD	FES
Ensembl_87	CAD	Ctrl	ENST00000409760	rs7579147	1001	2.91859e-08	3.85573e-06	0.000714715	0.0935147	0.905767	1.77511e-13	3.62e-10	rs7579147	rs7568458	0.999281	0.906418	CAD	VAMP8
Ensembl_87	CAD	AcLDL	ENST00000409760	rs7579147	1001	6.23742e-08	1.80162e-05	0.00152744	0.44063	0.557825	1.4969e-15	3.62e-10	rs7579147	rs7568458	0.998454	0.558688	CAD	VAMP8
Ensembl_87	MI	Ctrl	ENST00000452243	rs145583381	1062	5.47147e-07	0.00049732	5.54123e-05	0.049416	0.950031	7.87673e-17	7.38837e-08	rs145583381	rs11372849	0.999447	0.950557	MI	FES
Ensembl_87	MI	Ctrl	ENST00000452243	rs12906125	1055	5.47147e-07	0.00049732	5.54121e-05	0.0494159	0.950031	7.87673e-17	7.38837e-08	rs145583381	rs11372849	0.999447	0.950557	MI	FES
Ensembl_87	MI	AcLDL	ENST00000452243	rs145583381	1062	9.30607e-06	0.000435097	0.000942472	0.043109	0.955504	1.7524e-13	7.38837e-08	rs6227	rs11372849	0.998613	0.956831	MI	FES
Ensembl_87	MI	AcLDL	ENST00000452243	rs12906125	1055	9.30607e-06	0.000435101	0.000942469	0.0431092	0.955504	1.7524e-13	7.38837e-08	rs6227	rs11372849	0.998613	0.956831	MI	FES
Ensembl_87	MI	Ctrl	ENST00000456827	rs1332329	916	2.12659e-08	2.9447e-09	0.231969	0.0313843	0.736646	1.3911e-05	2.6849e-13	rs2246833	rs1332329	0.768031	0.959137	MI	LIPA
Ensembl_87	MI	AcLDL	ENST00000456827	rs1332329	916	5.62605e-09	1.6663e-09	0.0613693	0.0172547	0.921376	2.00222e-07	2.6849e-13	rs1332329	rs1332329	0.938631	0.981617	MI	LIPA
Ensembl_87	MI	Ctrl	ENST00000491598	rs7805521	795	0.00487354	0.0016997	0.0956783	0.0325035	0.865245	3.20819e-10	3.9163e-07	rs7805521	rs3735352	0.897748	0.963794	MI	PARP12
Ensembl_87	MI	Ctrl	ENST00000491598	rs117102789	800	0.00487251	0.00170999	0.0956522	0.0327037	0.865062	3.20819e-10	3.9163e-07	rs7805521	rs3735352	0.897765	0.963572	MI	PARP12
Ensembl_87	MI	AcLDL	ENST00000491598	rs7805521	795	0.0103337	0.00219265	0.202873	0.0423042	0.742297	1.04565e-07	3.9163e-07	rs117102789	rs3735352	0.784601	0.946082	MI	PARP12
Ensembl_87	MI	AcLDL	ENST00000491598	rs117102789	800	0.0103334	0.00219491	0.202854	0.042346	0.742272	1.04565e-07	3.9163e-07	rs117102789	rs3735352	0.784618	0.94603	MI	PARP12
Ensembl_87	CRE	Ctrl	ENST00000503513	rs10512696	1071	9.35202e-05	0.00969158	0.000640288	0.0654295	0.924145	7.52057e-16	4.54e-07	rs10512696	rs13179493	0.989575	0.933881	CRE	DAB2
Ensembl_87	CRE	AcLDL	ENST00000503513	rs10512696	1071	0.000691581	0.00504732	0.00473492	0.0336007	0.955926	5.6771e-11	4.54e-07	rs10512696	rs13179493	0.989526	0.966044	CRE	DAB2
Ensembl_87	CRP	Ctrl	ENST00000344086	rs12730935	941	2.63825e-15	1.67415e-14	0.00922858	0.0576282	0.933143	1.70717e-10	1.99e-18	rs12730935	rs4393147	0.990771	0.941835	CRP	IL6R
Ensembl_87	CRP	AcLDL	ENST00000344086	rs12730935	941	1.8507e-14	1.49569e-14	0.0647371	0.0514354	0.883827	1.4429e-07	1.99e-18	rs12730935	rs4393147	0.935263	0.945004	CRP	IL6R
Ensembl_87	CRP	Ctrl	ENST00000611786	rs11608	438	0.000802295	0.00165515	0.0364922	0.0743977	0.886653	2.67569e-08	1.45e-07	rs1275541	rs7586601	0.96105	0.922587	CRP	ATRAID
Ensembl_87	CRP	AcLDL	ENST00000611786	rs11608	438	0.000453789	0.00166922	0.0206405	0.0750221	0.902214	5.99425e-09	1.45e-07	rs1275541	rs7586601	0.977236	0.92323	CRP	ATRAID
Ensembl_87	IL6	Ctrl	ENST00000344086	rs12730935	941	1.27455e-22	8.08785e-22	0.00328987	0.0198996	0.976811	1.70717e-10	1.47e-25	rs12730935	rs12126142	0.99671	0.980035	IL6	IL6R
Ensembl_87	IL6	AcLDL	ENST00000344086	rs12730935	941	1.61511e-21	1.3053e-21	0.0416893	0.0327669	0.925544	1.4429e-07	1.47e-25	rs12730935	rs12126142	0.958311	0.965808	IL6	IL6R
Ensembl_87	PLT	Ctrl	ENST00000360743	rs12728001	701	1.46723e-05	0.00294272	0.000270337	0.0532759	0.943496	2.54552e-13	7.95e-07	rs351372	rs902289	0.996772	0.946552	PLT	ST7L
Ensembl_87	PLT	Ctrl	ENST00000369642	rs35221527	752	0.00130384	0.00379213	0.0240275	0.0689805	0.901896	1.30764e-10	7.95e-07	rs35221527	rs902289	0.970877	0.92895	PLT	RHOC
Ensembl_87	PLT	Ctrl	ENST00000361846	rs3013440	747	0.000237601	0.0026602	0.00437841	0.0480763	0.944648	7.73689e-10	7.95e-07	rs7544663	rs902289	0.992724	0.951571	PLT	ST7L
Ensembl_87	PLT	AcLDL	ENST00000360743	rs12728001	701	0.00039451	0.00302438	0.00726882	0.0547896	0.934523	3.63665e-09	7.95e-07	rs7544663	rs902289	0.989312	0.944619	PLT	ST7L
Ensembl_87	PLT	AcLDL	ENST00000369642	rs35221527	752	0.0133435	0.00488855	0.245898	0.089441	0.646429	3.11236e-09	7.95e-07	rs35221527	rs902289	0.73587	0.878455	PLT	RHOC
Ensembl_87	PLT	AcLDL	ENST00000361846	rs3013440	747	6.98113e-05	0.00223073	0.00128645	0.0401506	0.956262	4.42329e-11	7.95e-07	rs3013440	rs902289	0.996413	0.959705	PLT	ST7L
Ensembl_87	WBC	Ctrl	ENST00000339082	rs4760	1137	0.0446947	0.00569418	0.13882	0.0168919	0.7939	7.91957e-08	4.47e-07	rs4760	rs4760	0.810791	0.979166	WBC	PLAUR
Ensembl_87	WBC	AcLDL	ENST00000339082	rs4760	1137	0.0955637	0.0120847	0.296816	0.0369758	0.55856	4.03132e-06	4.47e-07	rs4760	rs4760	0.595536	0.937912	WBC	PLAUR
Ensembl_87	CAD_2017	Ctrl	ENST00000524817	rs34552339	1017	0.000159503	6.64069e-05	0.175866	0.0724679	0.75144	2.50409e-07	5.354e-09	rs34552339	rs10840293	0.823908	0.912044	CAD	SWAP70
Ensembl_87	CAD_2017	Ctrl	ENST00000447399	rs12360647	974	0.000584018	6.52655e-05	0.643928	0.0716769	0.283745	0.000516393	5.354e-09	rs76803283	rs10840293	0.355422	0.798333	CAD	SWAP70
Ensembl_87	CAD_2017	AcLDL	ENST00000524817	rs34552339	1017	0.000555031	7.86561e-05	0.611969	0.0864241	0.300973	3.15325e-05	5.354e-09	rs10734649	rs10840293	0.387397	0.776911	CAD	SWAP70
Ensembl_87	CAD_2017	AcLDL	ENST00000447399	rs12360647	974	6.06159e-05	2.50634e-05	0.0668341	0.0267281	0.906352	5.89919e-07	5.354e-09	rs12360647	rs10840293	0.93308	0.971355	CAD	SWAP70
Ensembl_87	CAD_2017	Ctrl	ENST00000452243	rs145583381	1023	4.58571e-12	4.16809e-09	1.94825e-05	0.016725	0.983256	7.87673e-17	6.279e-13	rs145583381	rs11330240	0.999981	0.983275	CAD	FES
Ensembl_87	CAD_2017	Ctrl	ENST00000452243	rs12906125	1016	4.58571e-12	4.16809e-09	1.94825e-05	0.016725	0.983256	7.87673e-17	6.279e-13	rs145583381	rs11330240	0.999981	0.983275	CAD	FES
[truncated: 350 more rows]
