# Supplementary material for: Genetic effects on promoter usage are highly context-specific and contribute to complex traits
Source: eLife journal article supplement (doi:10.7554/elife.41673), 2019-01-08
Supplement: supp [file elife-41673-supp-v1.zip]

Log<sub>10</sub> permutation p-value (beta approximation)

read count

12660 genes

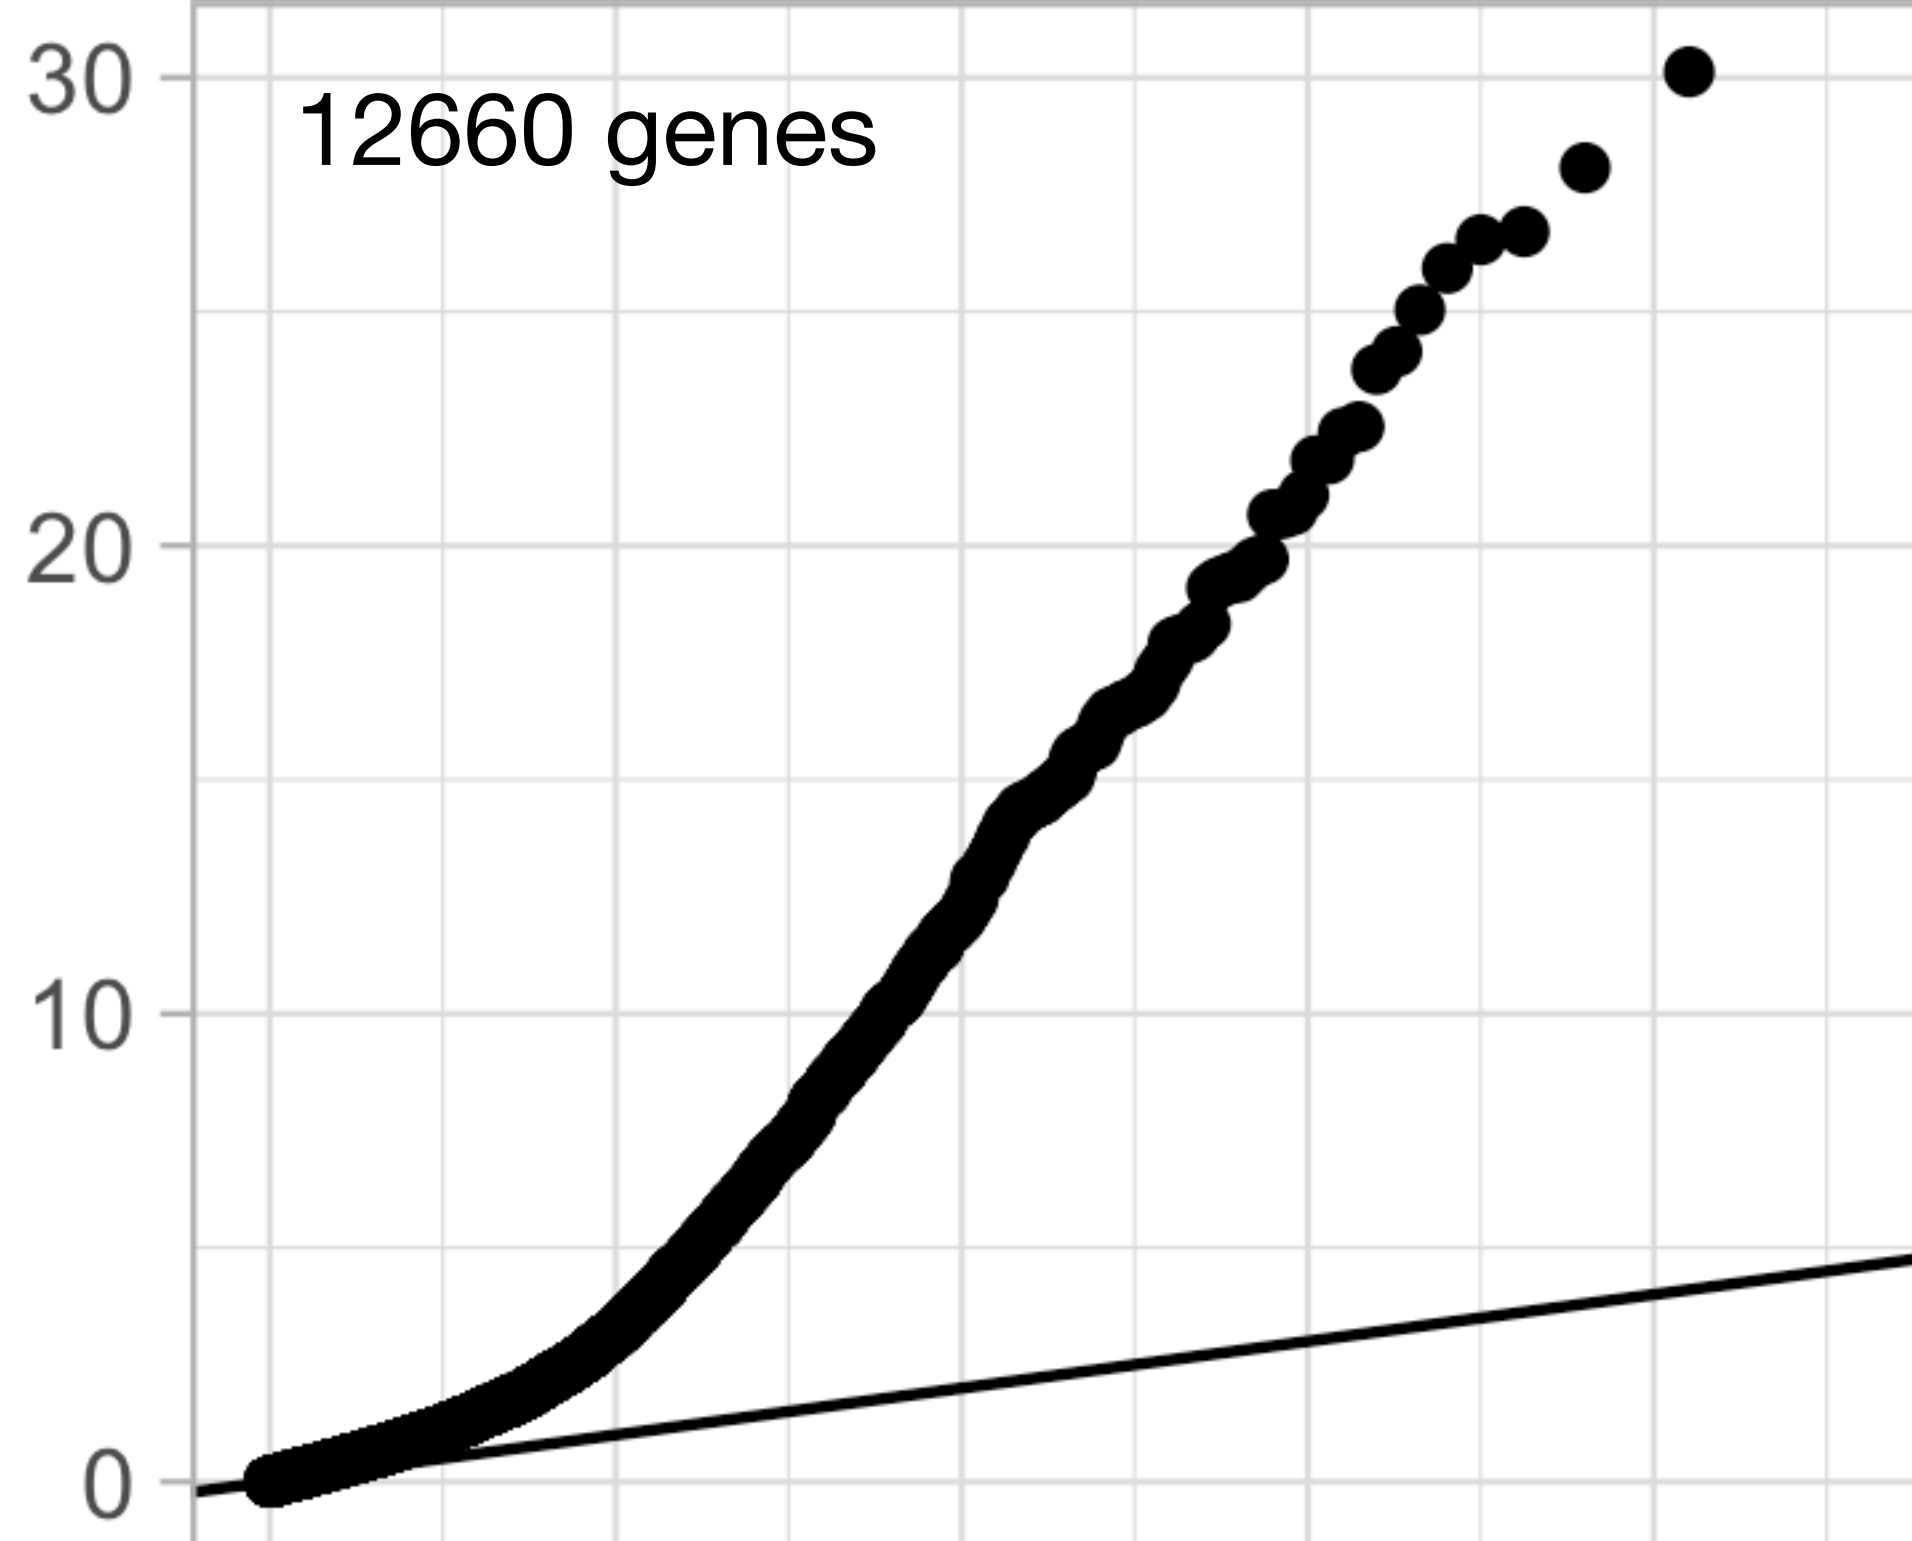

full-length txs

12617 genes

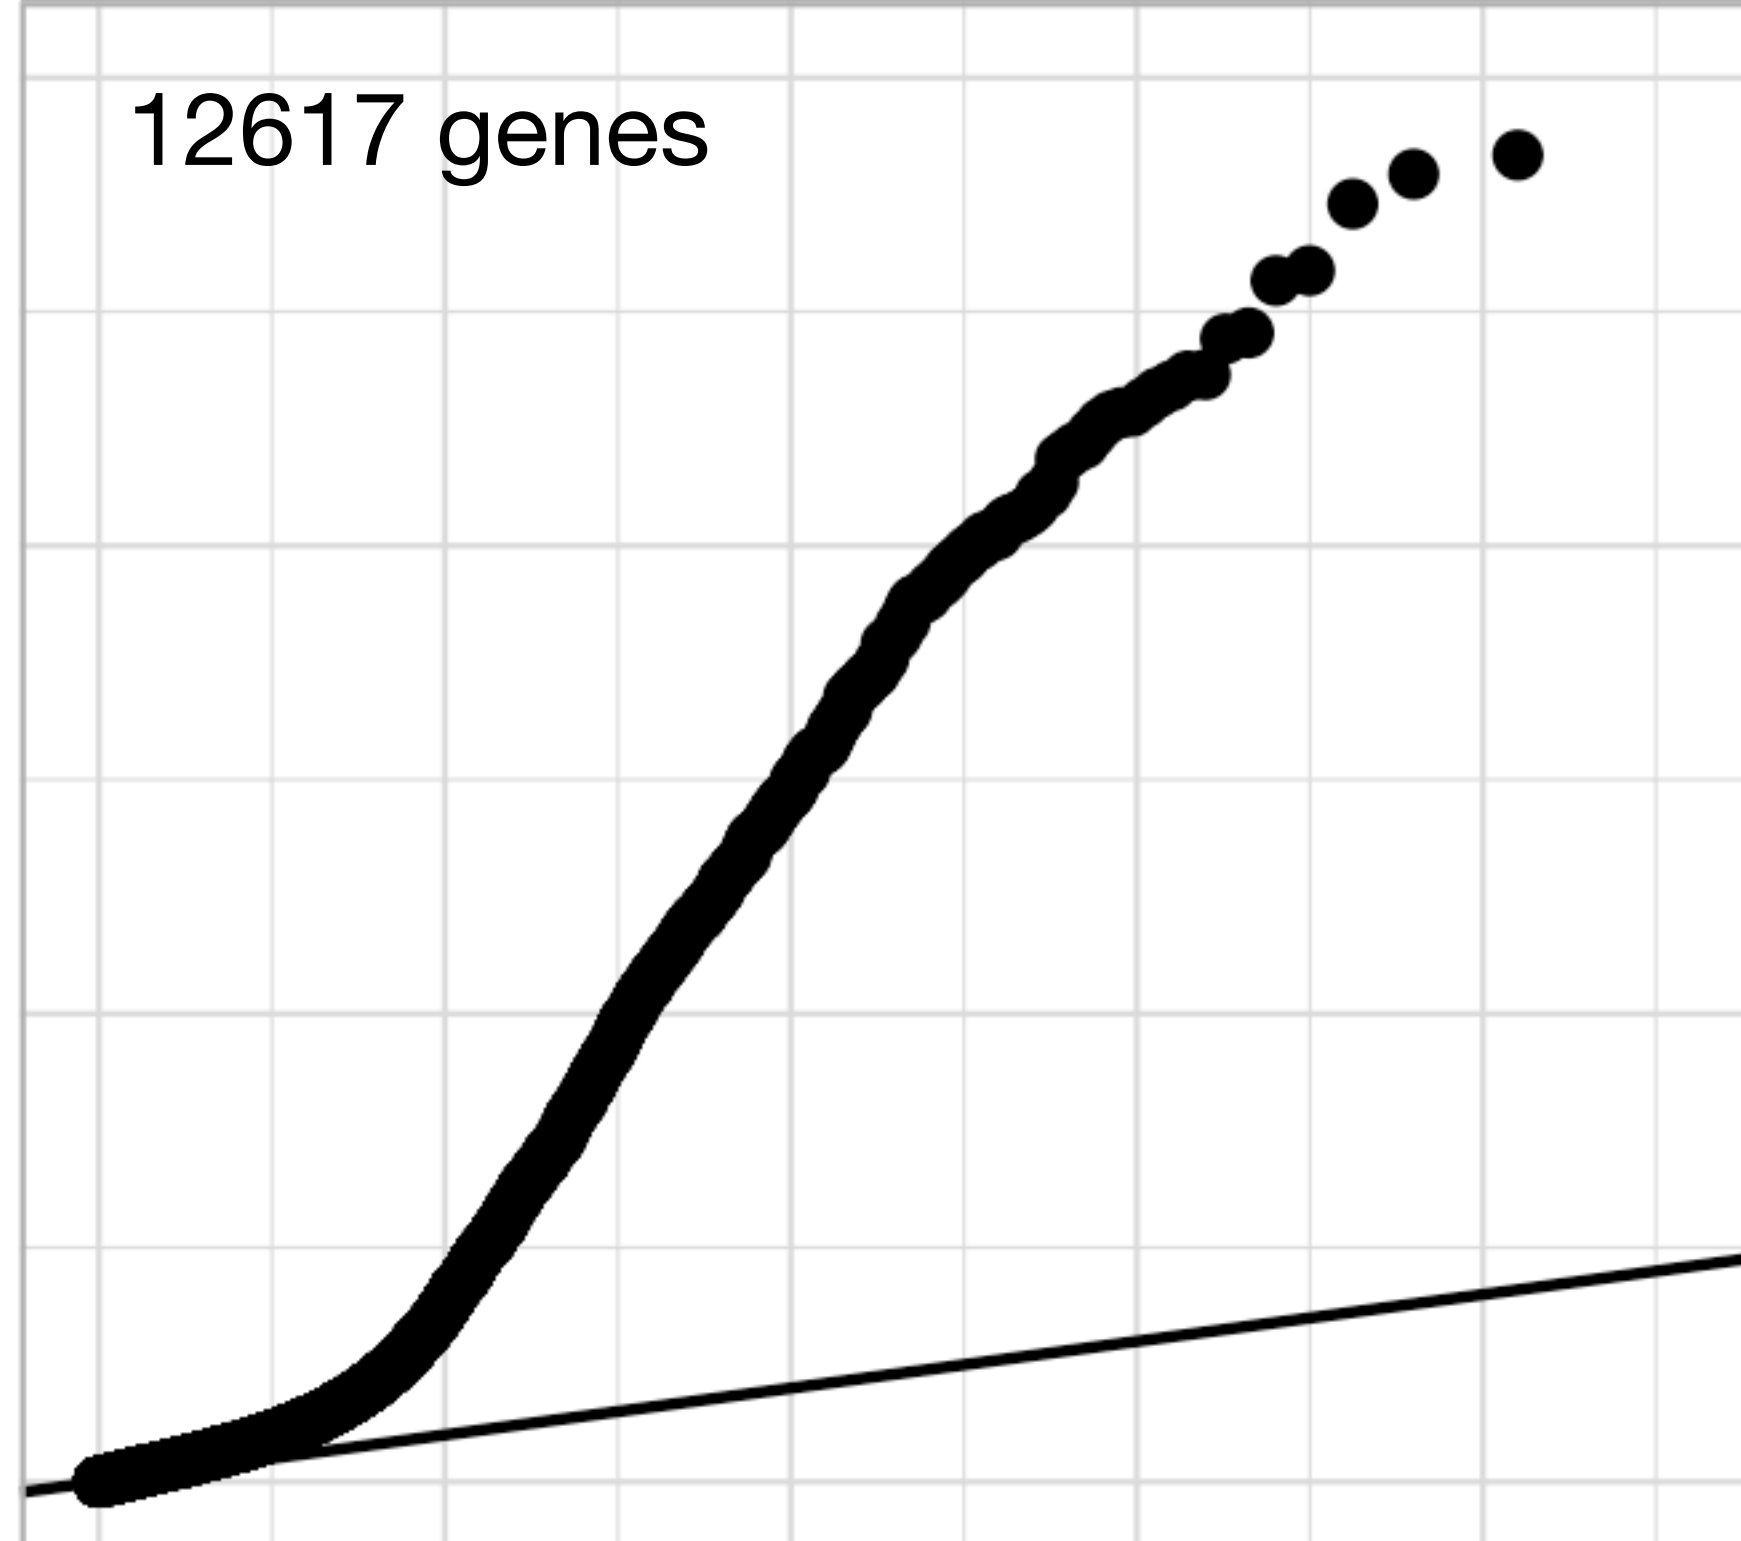

Leafcutter

37363 intron clusters

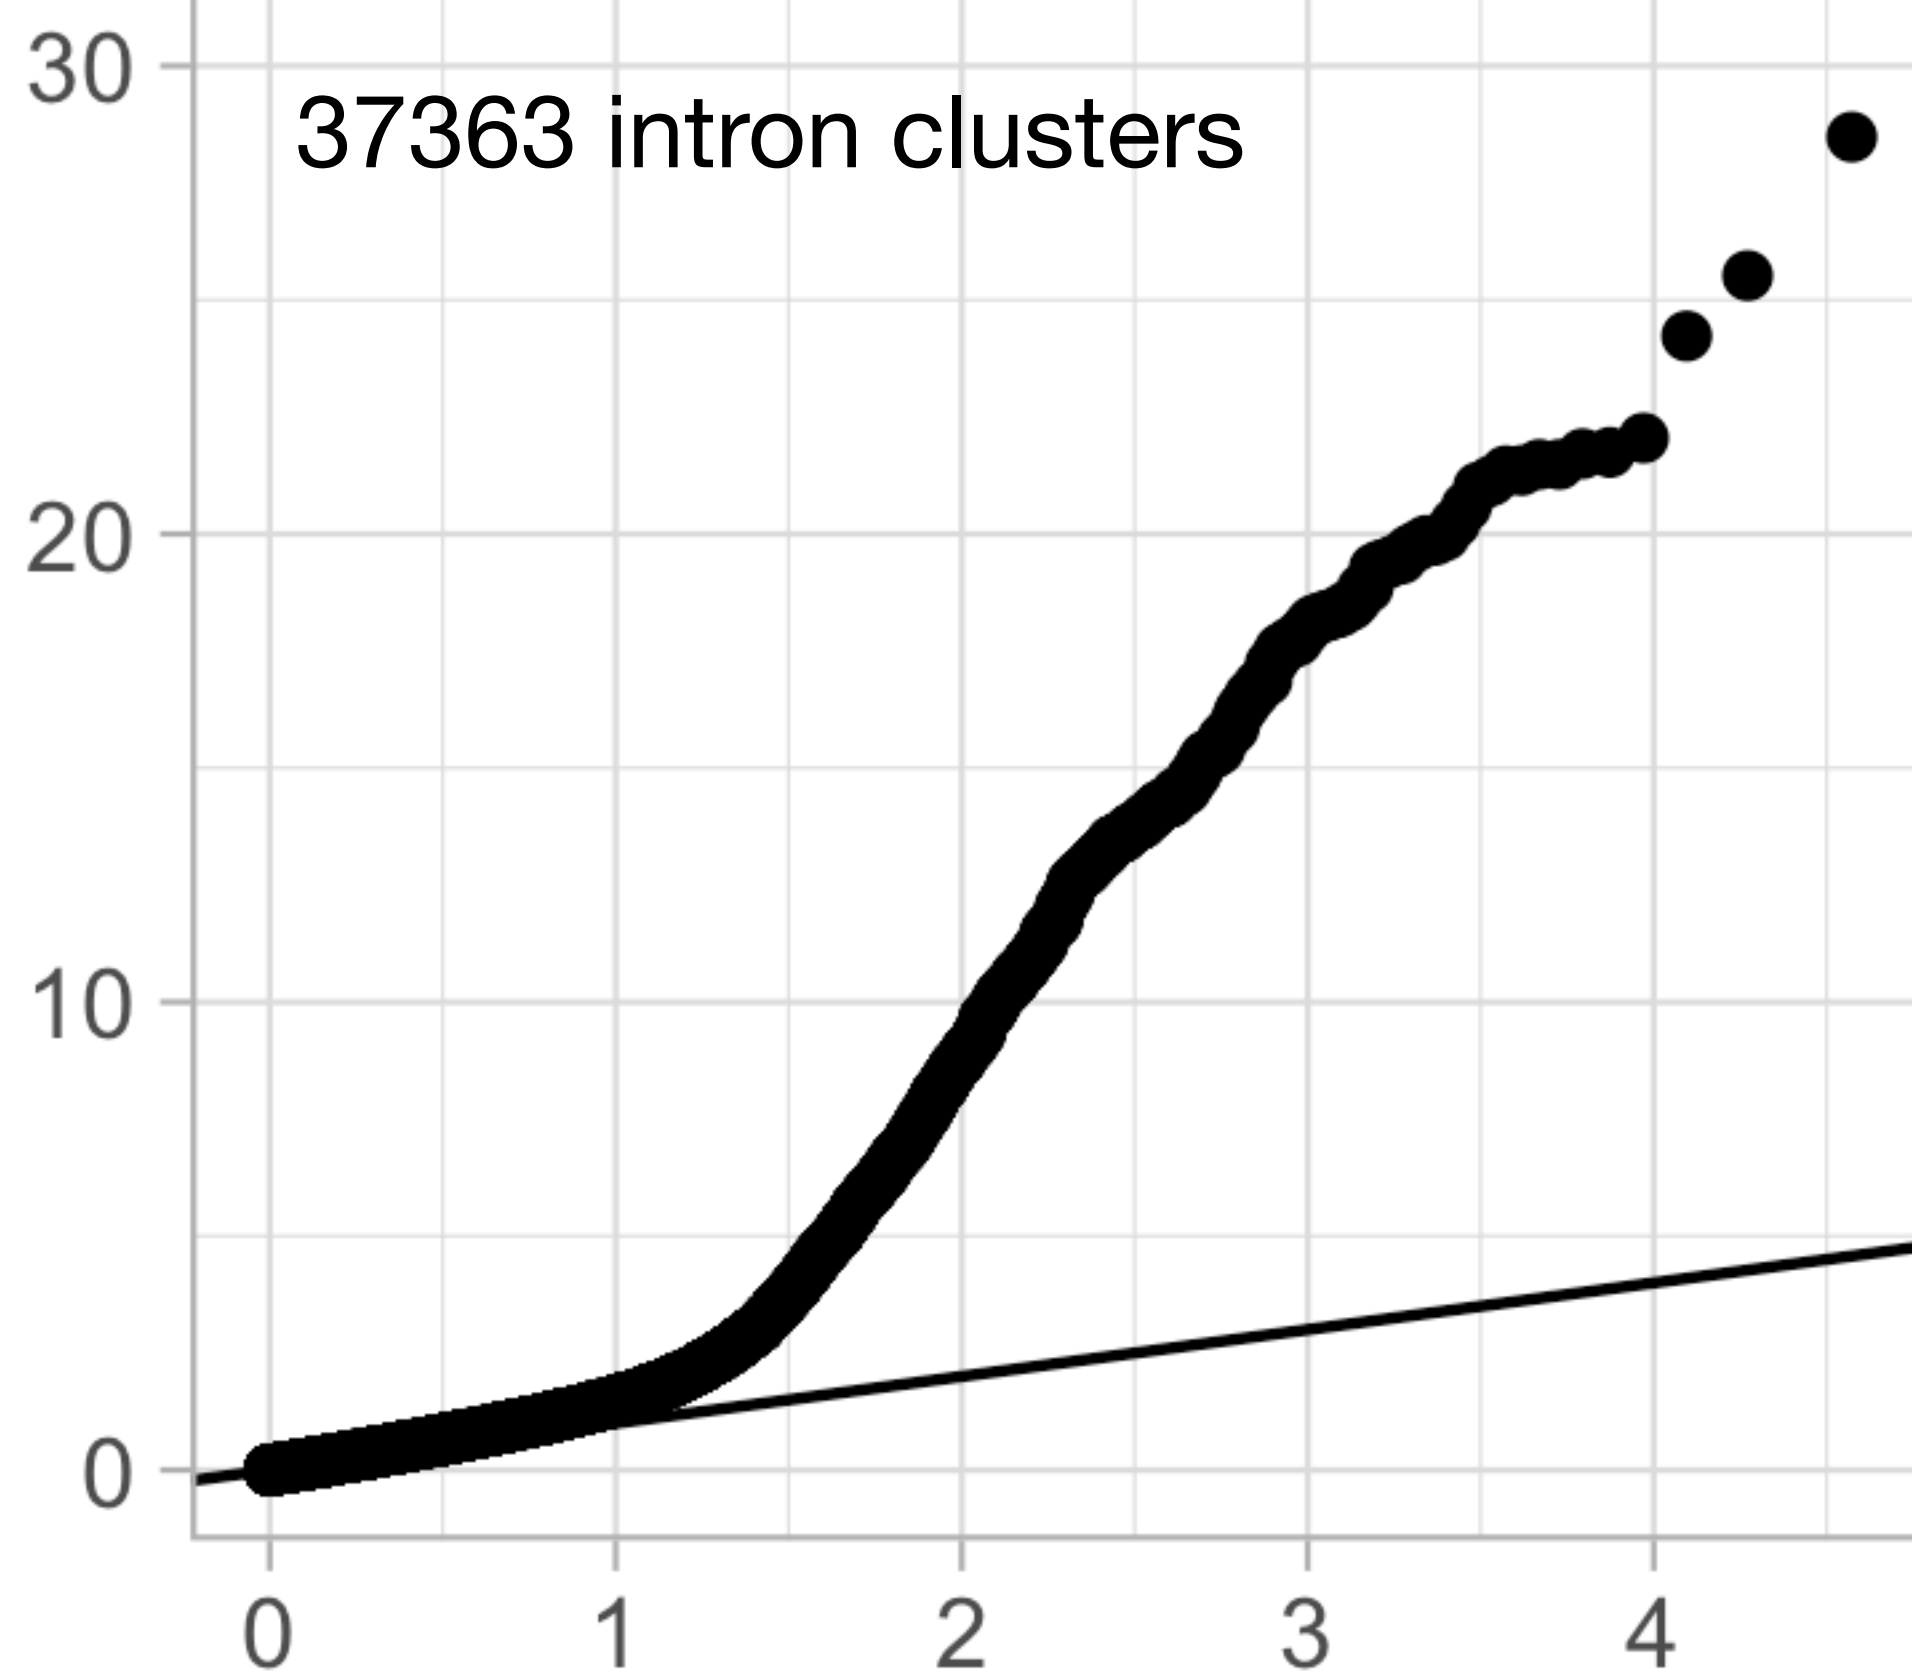

txrevise

28289 transcriptional  
events

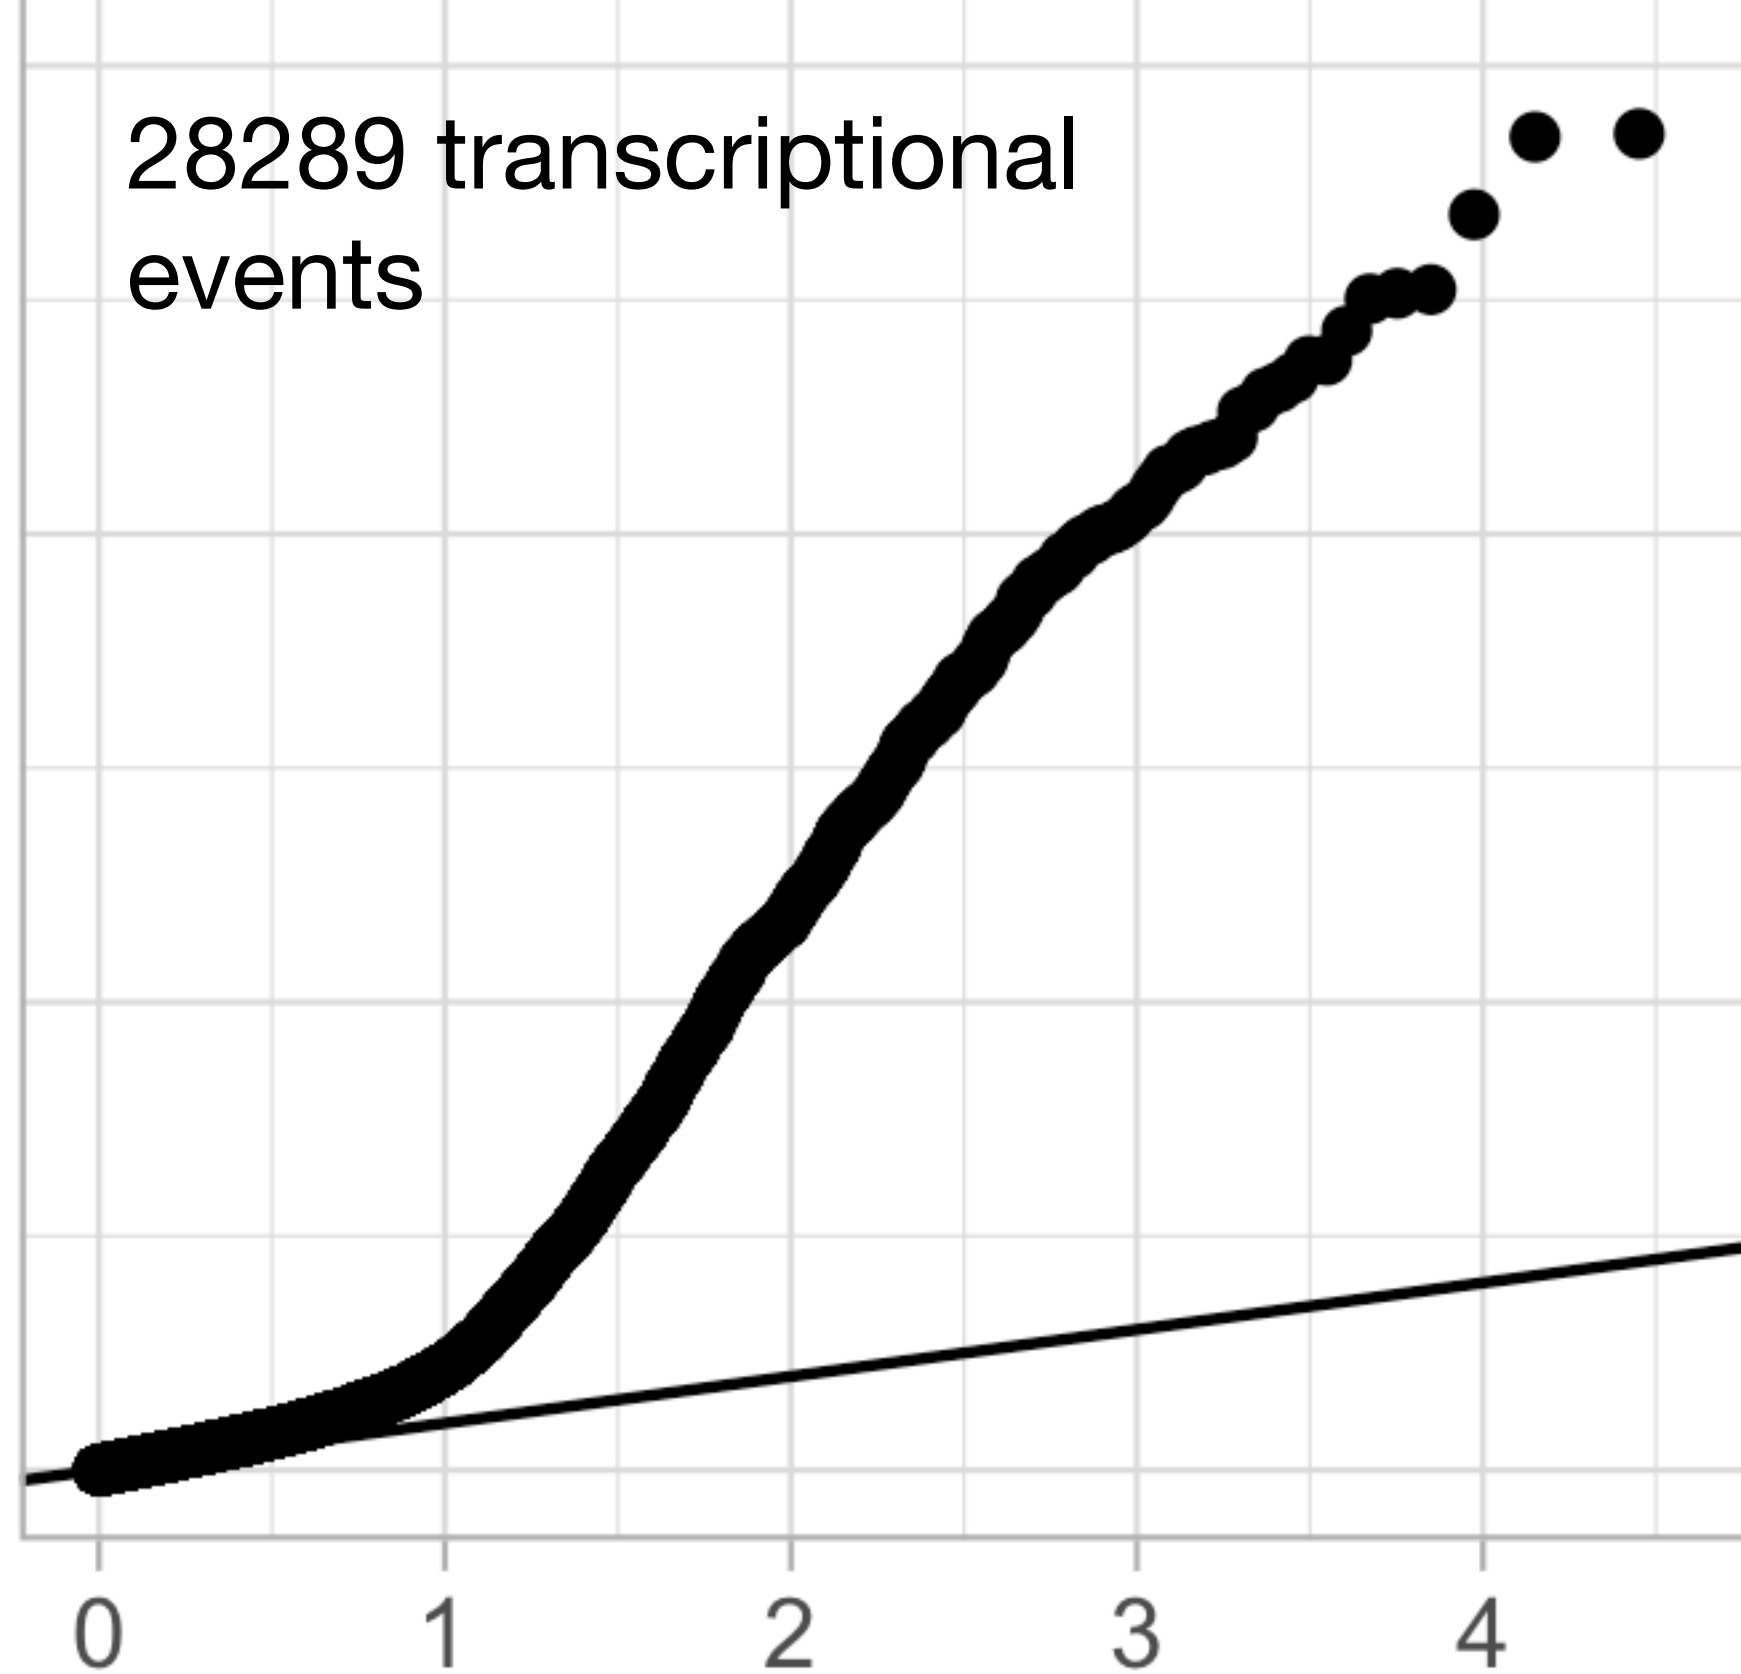

Log<sub>10</sub> expected p-value
