# Supplementary material for: Genetic effects on promoter usage are highly context-specific and contribute to complex traits
Source: eLife journal article supplement (doi:10.7554/elife.41673), 2019-01-08

Group 1: 14 transcripts share 7 exons.

Transcript ENST00000613821 is excluded, because it shares less exons with other transcripts.

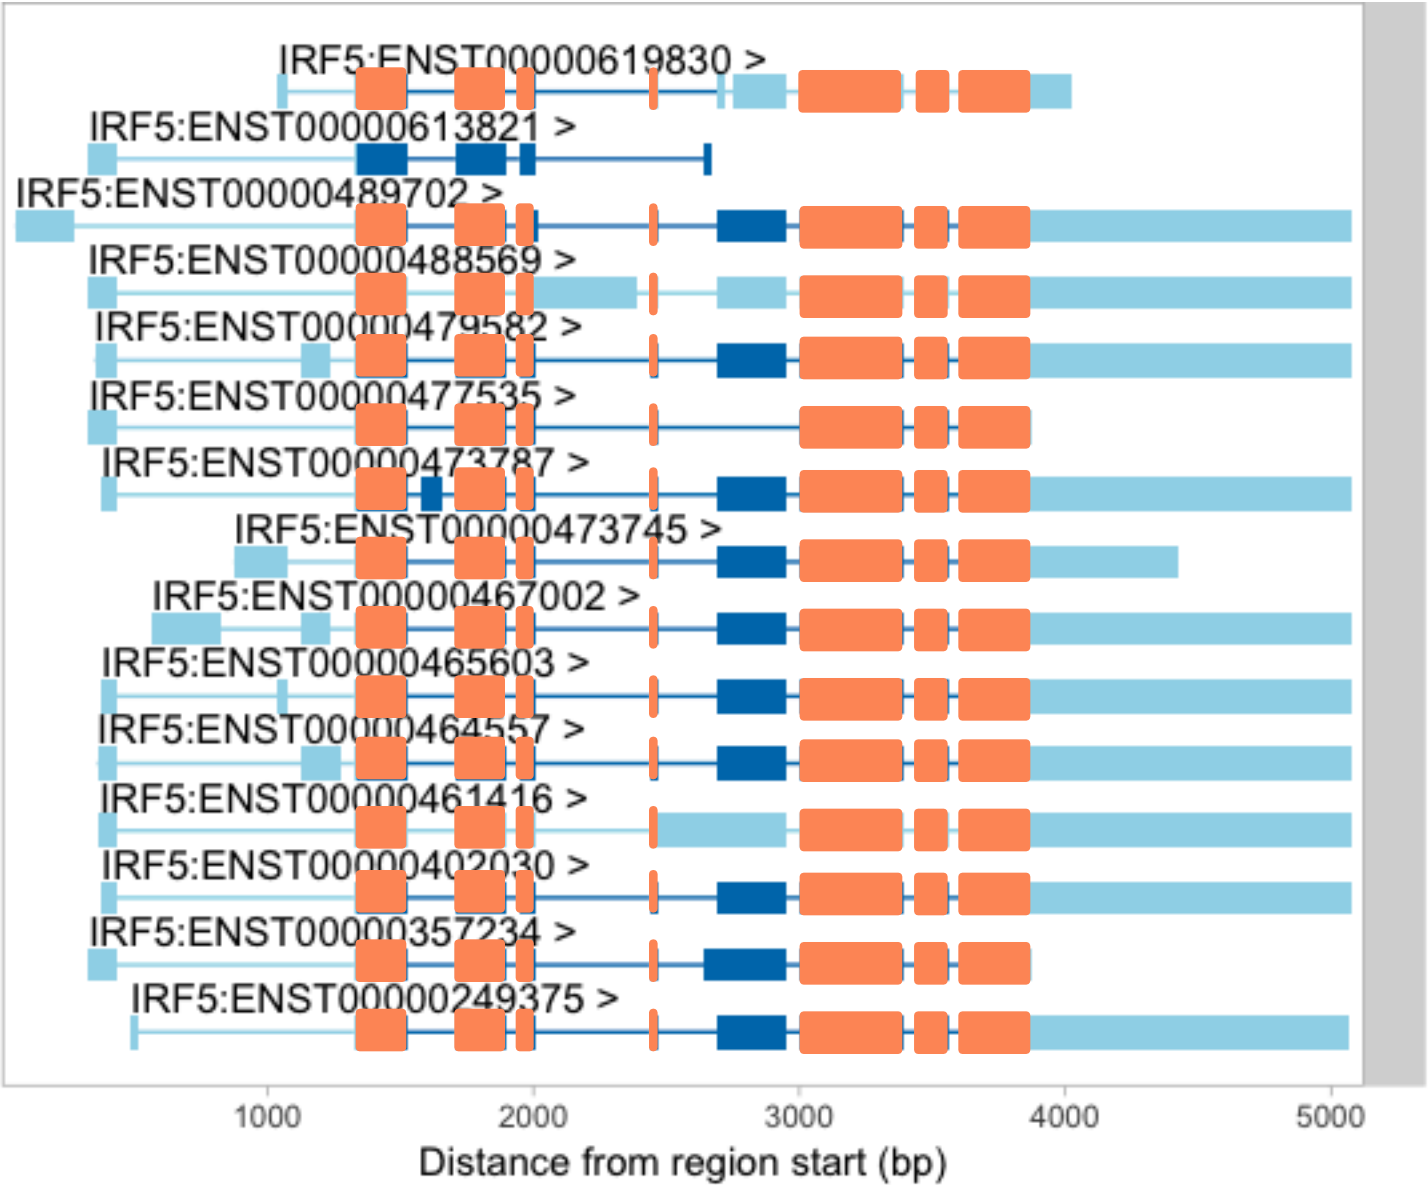

Group 2: All 15 transcripts share 3 exons.

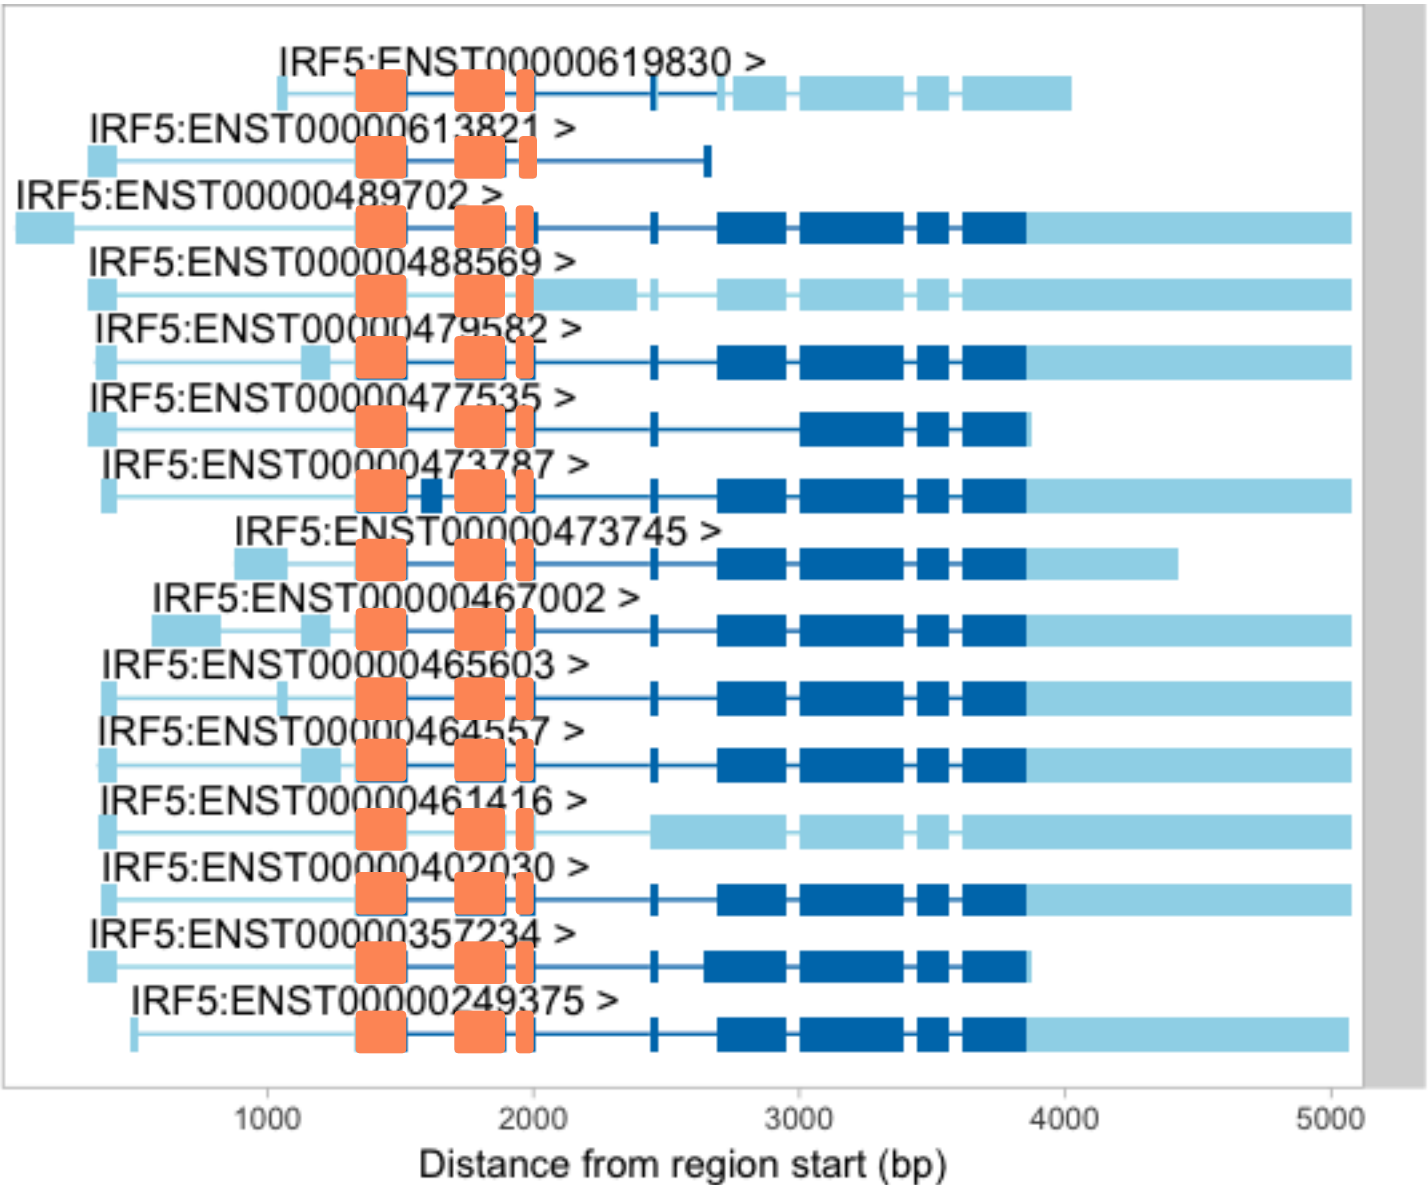

Supplement: supp [file elife-41673-supp-v1.zip]
