# Supplementary material for: Genetic effects on promoter usage are highly context-specific and contribute to complex traits
Source: eLife journal article supplement (doi:10.7554/elife.41673), 2019-01-08
Supplement: supp [file elife-41673-supp-v1.zip]

A

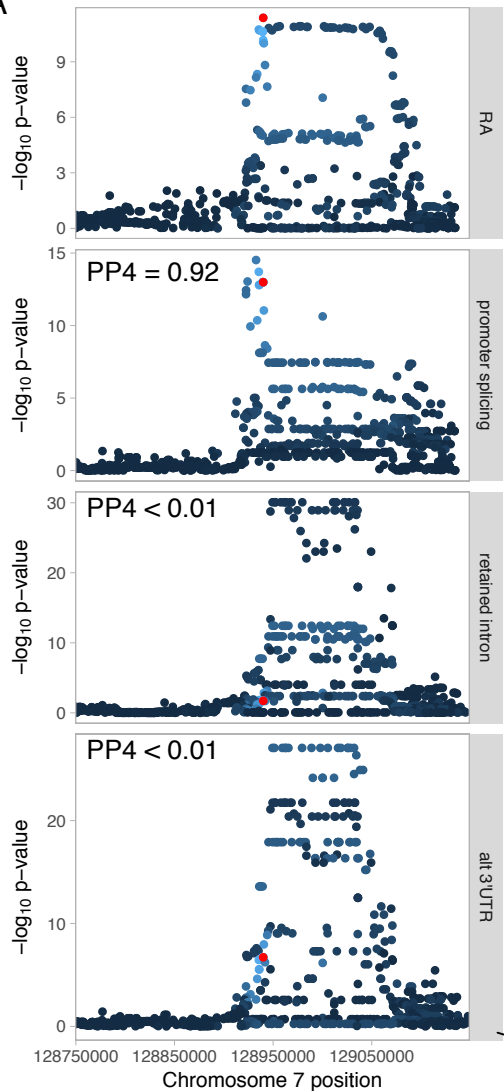

B

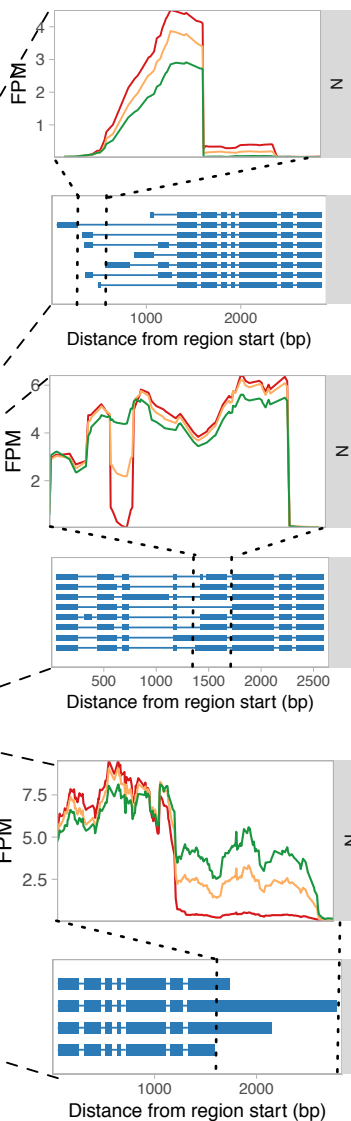

Detected by:

- ~~X~~ read count
- ~~X~~ transcript usage
- ✓ Leafcutter
- ✓ txrevise

Detected by:

- ~~X~~ read count
- ~~X~~ transcript usage
- ~~X~~ Leafcutter
- ✓ txrevise

Detected by:

- ~~X~~ read count
- ✓ transcript usage
- ~~X~~ Leafcutter
- ✓ txrevise
