# Supplementary material for: Genetic effects on promoter usage are highly context-specific and contribute to complex traits
Source: eLife. 2019 Jan 8;8:e41673. doi: 10.7554/eLife.41673 (PMC6349408; doi:10.7554/eLife.41673)
Supplement: Supplementary file 1. [file elife-41673-supp1.xlsx]

## Sheet: Differentiations
line_id	donor	clone	replicate	ips_received	ips_started	passage_received	received_as	media	EB_formation	passage_diff	diff_start	salmonella_date	atac_date	flow_date	medium_changes	terminated	status	mean_purity	max_purity	genotype_id	open_access	sex	RNA_included	ATAC_included
peop_2	peop	2	1	2014-02-19	2014-02-19	23	alive	KSR	2014-02-27	25	2014-03-03	2014-06-03	NA	2014-05-20	20	2014-06-13	Success	0.971741	0.974387	HPSI0413i-peop_2	0	male	1	0
fpdl_1	fpdl	1	2	2014-03-12	2014-03-12	42	alive	KSR	2014-03-22	44	2014-03-25	2014-06-03	NA	2014-05-20	14	2014-06-13	Success	0.965837	0.968465	HPSI0813i-fpdl_1	0	female	0	0
ougl_3	ougl	3	1	2014-03-12	2014-03-12	26	alive	KSR	2014-03-18	27	2014-03-21	2014-06-03	NA	2014-05-20	15	2014-06-13	Success	0.95565	0.960368	HPSI0413i-ougl_3	0	male	1	0
ffdk_1	ffdk	1	1	2014-03-19	2014-03-19	18	alive	KSR	2014-03-24	19	2014-03-27	NA	NA	2014-05-20	12	2014-06-13	FC_QC_fail	0.817766	0.82209	HPSI0813i-ffdk_1	0	male	0	0
iasn_3	iasn	3	1	2014-03-19	2014-03-19	30	alive	KSR	2014-03-24	31	2014-03-27	2014-06-03	NA	2014-05-20	14	2014-06-13	Success	0.984282	0.985095	HPSI0513i-iasn_3	0	female	1	0
aipt_2	aipt	2	1	2014-04-22	2014-04-22	27	alive	KSR	2014-04-26	28	2014-04-30	2014-06-14	NA	2014-06-16	11	2014-07-08	Success	0.98996	0.995289	HPSI0513i-aipt_2	0	male	1	0
liun_2	liun	2	1	2014-04-22	2014-04-22	25	alive	KSR	2014-04-26	26	2014-04-30	2014-06-14	NA	2014-06-20	12	2014-07-08	Success	0.982465	0.989529	HPSI0613i-liun_2	0	male	1	0
oomz_2	oomz	2	1	2014-05-06	2014-05-06	27	alive	KSR	2014-05-10	28	2014-05-14	2014-06-14	NA	2014-06-16	6	2014-06-26	Success	0.990832	0.994123	HPSI0613i-oomz_2	0	female	1	0
qanu_2	qanu	2	1	2014-05-06	2014-05-06	28	alive	KSR	2014-05-10	29	2014-05-14	2014-06-14	NA	2014-06-20	6	2014-06-26	Success	0.977525	0.991109	HPSI0613i-qanu_2	0	female	1	0
hikj_1	hikj	1	1	2014-05-12	2014-05-12	28	alive	KSR	2014-05-17	29	2014-05-21	2014-07-15	NA	2014-07-01	8	2014-07-16	Success	0.994329	0.999823	HPSI0613i-hikj_1	0	male	1	0
qimz_1	qimz	1	1	2014-05-12	2014-05-12	26	alive	KSR	2014-05-17	27	2014-05-21	2014-07-15	NA	2014-07-01	8	2014-07-16	Success	0.985409	0.986667	HPSI0713i-qimz_1	0	female	1	0
uoxz_5	uoxz	5	1	2014-05-12	2014-05-21	34	frozen	KSR	2014-06-09	37	2014-06-13	NA	NA	NA	13	2014-08-19	Diff_fail	NA	NA	HPSI0513i-uoxz_5	0	female	0	0
zisa_3	zisa	3	1	2014-05-12	2014-05-12	29	alive	KSR	2014-05-18	30	2014-05-22	2014-07-15	NA	2014-07-01	8	2014-07-15	Success	0.987375	0.990365	HPSI0613i-zisa_3	0	male	1	0
oarz_2	oarz	2	1	2014-06-23	2014-06-23	35	alive	KSR	2014-06-30	36	2014-07-04	2014-08-22	NA	NA	9	2014-08-27	RNA_QC_fail	NA	NA	HPSI0513i-oarz_2	0	male	0	0
oarz_2	oarz	2	2	2014-06-23	2014-09-15	36	frozen	KSR	2014-10-03	39	2014-10-06	2014-11-05	NA	2014-11-11	5	2014-11-13	Success	0.993752	0.999262	HPSI0513i-oarz_2	0	male	1	0
yuze_1	yuze	1	1	2014-07-03	2014-07-03	53	alive	KSR	2014-07-08	54	2014-07-11	2014-08-22	NA	2014-08-28	10	2014-09-09	Success	0.991012	0.993636	HPSI0413i-yuze_1	0	male	1	0
coxy_3	coxy	3	1	2014-07-08	2014-07-08	18	alive	KSR	2014-07-15	19	2014-07-19	2014-08-29	NA	2014-08-28	8	2014-09-09	Success	0.993086	0.993984	HPSI0413i-coxy_3	0	male	1	0
funp_3	funp	3	1	2014-07-08	2014-07-08	27	alive	KSR	2014-07-15	28	2014-07-19	2014-08-22	NA	2014-08-28	8	2014-09-09	Success	0.980802	0.983814	HPSI0613i-funp_3	0	male	1	0
airc_2	airc	2	1	2014-07-17	2014-07-18	25	frozen	KSR	2014-08-12	30	2014-08-16	NA	NA	NA	NA	2014-10-06	Diff_fail	NA	NA	HPSI0313i-airc_2	0	female	0	0
ffdm_3	ffdm	3	1	2014-07-17	2014-08-18	36	frozen	KSR	2014-09-09	39	2014-09-12	2014-10-13	NA	2014-10-29	NA	2014-10-21	Success	0.976325	0.986077	HPSI0813i-ffdm_3	0	male	1	0
fpdl_1	fpdl	1	1	2014-07-17	2014-07-18	27	frozen	KSR	2014-09-01	35	2014-09-05	2014-10-22	NA	2014-10-29	6	2014-10-21	Success	0.985856	0.996969	HPSI0813i-fpdl_1	0	female	1	0
gedo_3	gedo	3	1	2014-07-17	2014-07-29	28	frozen	KSR	2014-08-10	31	2014-08-14	NA	NA	2014-09-19	NA	2014-10-06	FC_QC_fail	0.845861	0.847439	HPSI0913i-gedo_3	0	male	0	0
golb_1	golb	1	1	2014-07-17	2014-08-18	24	frozen	KSR	2014-09-09	29	2014-09-12	2014-10-22	NA	2014-11-11	7	2014-11-14	Success	0.782961	0.788778	HPSI0513i-golb_1	0	female	1	0
gomv_3	gomv	3	1	2014-07-17	2014-08-18	43	frozen	KSR	2014-09-12	47	2014-09-16	2014-10-22	NA	2014-10-29	7	2014-11-14	Success	0.982432	0.987662	HPSI0413i-gomv_3	0	male	1	0
koun_2	koun	2	1	2014-07-17	2014-07-29	25	frozen	KSR	2014-08-26	30	2014-08-29	NA	NA	NA	NA	2014-10-11	Diff_fail	NA	NA	HPSI0213i-koun_2	0	female	0	0
koun_2	koun	2	2	2014-07-17	2015-01-13	31	frozen	KSR	2015-01-28	33	2015-01-31	NA	NA	NA	6	2015-03-09	Diff_fail	NA	NA	HPSI0213i-koun_2	0	female	0	0
leeh_3	leeh	3	1	2014-07-17	2014-07-29	29	frozen	KSR	2014-08-09	32	2014-08-13	NA	NA	NA	NA	2014-10-06	Diff_fail	NA	NA	HPSI0513i-leeh_3	0	male	0	0
leeh_3	leeh	3	2	2014-07-17	2015-01-13	32	frozen	KSR	2015-01-30	36	2015-02-02	NA	NA	NA	5	2015-03-09	Diff_fail	NA	NA	HPSI0513i-leeh_3	0	male	0	0
oeoo_2	oeoo	2	1	2014-07-17	2014-07-29	34	frozen	KSR	2014-08-13	36	2014-08-16	2014-10-13	NA	2014-09-19	5	2014-10-28	Success	0.993033	0.994513	HPSI0513i-oeoo_2	0	male	1	0
xekf_1	xekf	1	1	2014-07-28	2014-07-28	35	alive	KSR	2014-08-01	36	2014-08-05	NA	NA	NA	NA	2014-10-06	Diff_fail	NA	NA	HPSI0413i-xekf_1	0	female	0	0
huls_1	huls	1	1	2014-08-06	2014-08-06	36	alive	KSR	2014-08-09	37	2014-08-13	2014-09-18	NA	2014-09-19	6	2014-09-23	Success	0.968401	0.969049	HPSI0513i-huls_1	0	female	1	0
vopm_2	vopm	2	1	2014-08-06	2014-08-06	38	alive	KSR	2014-08-11	39	2014-08-15	NA	NA	NA	6	2014-10-21	Diff_fail	NA	NA	HPSI0913i-vopm_2	0	female	0	0
vopm_2	vopm	2	2	2014-08-06	2015-01-09	39	frozen	KSR	2015-01-27	42	2015-01-30	NA	NA	NA	6	2015-03-09	Diff_fail	NA	NA	HPSI0913i-vopm_2	0	female	0	0
giuo_4	giuo	4	1	2014-08-19	2014-09-03	30	frozen	KSR	2014-10-06	34	2014-10-10	2014-11-05	NA	2014-11-11	5	2014-11-13	Success	0.983813	0.986366	HPSI0613i-giuo_4	0	male	1	0
iakz_1	iakz	1	1	2014-08-19	2014-09-03	27	frozen	KSR	2014-09-23	30	2014-09-27	NA	NA	NA	6	2014-10-31	Diff_fail	NA	NA	HPSI0413i-iakz_1	0	male	0	0
iakz_1	iakz	1	2	2014-08-19	2015-01-09	31	frozen	KSR	2015-01-29	34	2015-02-01	NA	NA	NA	7	2015-03-09	Diff_fail	NA	NA	HPSI0413i-iakz_1	0	male	0	0
uahf_3	uahf	3	1	2014-08-19	2014-09-03	31	frozen	KSR	2014-09-29	35	2014-10-03	NA	NA	2014-11-21	11	2014-11-28	FC_QC_fail	0.88971	0.893478	HPSI0413i-uahf_3	0	female	0	0
cuau_2	cuau	2	1	2014-09-17	2014-09-17	37	alive	KSR	2014-09-23	38	2014-09-27	2014-11-20	NA	2014-10-29	11	2014-11-25	Success	0.985292	0.989448	HPSI0513i-cuau_2	0	female	1	0
darw_2	darw	2	1	2014-09-17	2014-09-17	37	alive	KSR	2014-09-24	38	2014-09-28	2014-11-05	NA	2014-10-29	13	2014-11-25	Success	0.989461	0.990918	HPSI0713i-darw_2	0	female	1	0
kaks_3	kaks	3	1	2014-09-17	2014-09-17	37	alive	KSR	2014-09-22	38	2014-09-26	2014-10-22	NA	2014-11-11	8	2014-11-14	Success	0.959818	0.977189	HPSI0713i-kaks_3	0	male	1	0
uoxz_5	uoxz	5	2	2014-09-17	2014-09-17	55	alive	KSR	2014-09-22	56	2014-09-26	NA	NA	NA	8	2014-11-14	Diff_fail	NA	NA	HPSI0513i-uoxz_5	0	female	0	0
cehw_3	cehw	3	1	2014-10-01	2014-10-01	33	alive	KSR	2014-10-07	34	2014-10-11	2014-11-20	NA	2014-11-18	9	2014-11-27	Success	0.960251	0.965147	HPSI0513i-cehw_3	0	female	1	0
coio_2	coio	2	1	2014-10-01	2014-10-01	38	alive	KSR	2014-10-07	39	2014-10-11	2014-11-20	NA	2014-11-18	9	2014-11-27	Success	0.974881	0.993852	HPSI0513i-coio_2	0	female	1	0
focm_1	focm	1	1	2014-10-01	2014-10-01	45	alive	KSR	2014-10-07	46	2014-10-11	NA	NA	NA	9	2014-11-27	Diff_fail	NA	NA	HPSI0613i-focm_1	0	male	0	0
focm_1	focm	1	2	2014-10-01	2015-01-09	46	frozen	KSR	2015-01-27	49	2015-01-30	NA	NA	NA	6	2015-03-09	Diff_fail	NA	NA	HPSI0613i-focm_1	0	male	0	0
vorx_1	vorx	1	1	2014-10-01	2014-10-01	40	alive	KSR	2014-10-06	41	2014-10-10	2014-11-20	NA	2014-11-11	7	2014-11-25	Success	0.9851	0.992102	HPSI0613i-vorx_1	0	male	1	0
debk_7	debk	7	1	2014-10-06	2014-10-06	34	alive	KSR	2014-10-13	35	2014-10-16	2014-11-26	NA	2014-11-27	9	2014-12-10	Success	0.968487	0.972026	HPSI0513i-debk_7	0	female	1	0
piun_3	piun	3	1	2014-10-06	2014-10-06	38	alive	KSR	2014-10-12	39	2014-10-16	NA	NA	2014-12-04	12	2014-12-19	Success	0.970687	0.974372	HPSI0813i-piun_3	0	female	0	0
piun_3	piun	3	2	2014-10-06	2015-01-09	39	frozen	KSR	2015-01-28	42	2015-01-31	NA	NA	2015-04-02	10	2015-04-07	FC_QC_fail	0.905582	0.909689	HPSI0813i-piun_3	0	female	0	0
riiv_1	riiv	1	1	2014-10-06	2014-10-06	32	alive	KSR	2014-10-12	33	2014-10-16	NA	NA	2014-11-21	10	2014-12-19	Success	0.964141	0.970118	HPSI0613i-riiv_1	0	female	0	0
voas_2	voas	2	1	2014-10-06	2014-10-06	37	alive	KSR	2014-10-13	38	2014-10-16	2014-11-26	NA	2014-11-21	10	2014-12-10	Success	0.997686	0.99834	HPSI0813i-voas_2	0	female	1	0
auim_2	auim	2	1	2014-10-10	2014-10-10	36	alive	KSR	2014-10-13	37	2014-10-16	2014-11-20	NA	2014-11-21	9	2014-12-10	Success	0.992998	0.999835	HPSI0613i-auim_2	0	female	1	0
babk_2	babk	2	1	2014-10-10	2014-10-10	36	alive	E8	2014-10-25	38	2014-10-29	NA	NA	2014-12-16	9	2014-12-19	Success	0.968872	0.972619	HPSI1213i-babk_2	1	female	0	0
babk_2	babk	2	2	2014-10-10	2015-09-15	37	alive/frozen	E8	2015-10-09	41	2015-10-12	2015-12-04	2015-12-04	2015-11-27	10	2015-12-04	Success	0.971436	0.973428	HPSI1213i-babk_2	1	female	1	1
meqo_3	meqo	3	1	2014-10-10	2014-10-10	39	alive	KSR	2014-10-16	40	2014-10-20	2014-11-20	NA	2014-11-27	8	2014-12-10	Success	0.99163	0.998534	HPSI0813i-meqo_3	0	male	1	0
zuta_1	zuta	1	1	2014-10-10	2014-10-10	31	alive	KSR	2014-10-16	32	2014-10-20	2014-11-20	NA	2014-11-21	6	2014-11-27	Success	0.996773	1	HPSI1113i-zuta_1	0	male	1	0
bima_1	bima	1	1	2014-10-24	2014-10-24	40	alive	E8	2014-11-04	42	2014-11-07	2014-12-12	2014-12-12	2014-12-16	6	2014-12-19	Success	0.985014	0.98894	HPSI1113i-bima_1	1	male	1	1
bulb_1	bulb	1	1	2014-10-24	2014-10-24	33	alive	E8	2014-11-07	35	2014-11-10	NA	NA	2014-12-16	7	2014-12-19	FC_QC_fail	0.903173	0.910406	HPSI0913i-bulb_1	0	female	0	0
bulb_1	bulb	1	2	2014-10-24	2015-01-09	35	frozen	KSR	2015-01-30	38	2015-02-02	NA	NA	NA	5	2015-03-09	Diff_fail	NA	NA	HPSI0913i-bulb_1	0	female	0	0
eofe_1	eofe	1	1	2014-10-24	2014-10-24	35	alive	KSR	2014-10-29	36	2014-11-01	2014-12-12	2014-12-12	2014-12-04	8	2014-12-19	Success	0.977151	0.979617	HPSI1113i-eofe_1	1	female	1	1
euir_2	euir	2	1	2014-10-24	2014-10-24	51	alive	KSR	2014-10-31	52	2014-11-04	2014-12-05	NA	2014-12-04	6	2014-12-19	Success	0.987446	0.990904	HPSI0513i-euir_2	0	male	1	0
jorr_1	jorr	1	1	2014-10-24	2014-10-24	47	alive	KSR	2014-10-31	48	2014-11-04	2014-12-12	NA	NA	8	2014-12-19	Success	NA	NA	HPSI0613i-jorr_1	0	female	1	0
nibo_2	nibo	2	1	2014-10-24	2015-01-09	27	frozen	KSR	2015-01-30	30	2015-02-02	2015-03-25	NA	2015-04-02	10	2015-04-07	Success	0.990144	0.999024	HPSI1113i-nibo_2	0	female	1	0
xegx_2	xegx	2	1	2014-10-24	2014-10-24	29	alive	KSR	2014-10-31	30	2014-11-04	NA	NA	NA	7	2014-12-19	Diff_fail	NA	NA	HPSI0513i-xegx_2	0	female	0	0
xegx_2	xegx	2	2	2014-10-24	2015-01-21	30	frozen	KSR	2015-02-08	33	2015-02-11	NA	NA	NA	5	2015-03-09	Diff_fail	NA	NA	HPSI0513i-xegx_2	0	female	0	0
nekd_1	nekd	1	1	2014-11-06	2015-02-02	32	alive/frozen	KSR	2015-02-27	37	2015-03-02	NA	NA	NA	6	2015-04-07	Diff_fail	NA	NA	HPSI1213i-nekd_1	1	male	0	0
ougl_3	ougl	3	2	2014-11-06	2015-01-09	47	alive/frozen	KSR	2015-01-29	50	2015-02-01	2015-03-25	NA	2015-04-02	10	2015-04-07	Success	0.831804	0.844166	HPSI0413i-ougl_3	0	male	0	0
bezi_1	bezi	1	1	2015-01-14	2015-05-26	30	frozen	E8	2015-06-15	34	2015-06-18	NA	NA	2015-07-30	10	2015-08-12	Success	0.955234	0.95924	HPSI0114i-bezi_1	1	female	0	0
bubh_1	bubh	1	1	2015-01-14	2015-02-04	24	frozen	E8	2015-02-20	28	2015-02-23	2015-04-01	NA	2015-04-13	10	2015-04-10	Success	0.801585	0.814092	HPSI0314i-bubh_1	1	female	1	0
cicb_3	cicb	3	1	2015-01-14	2015-03-09	39	frozen	E8	2015-03-27	43	2015-03-30	2015-04-24	2015-04-24	2015-04-23	6	2015-04-29	Success	0.970669	0.984043	HPSI0713i-cicb_3	0	male	1	1
cuhk_2	cuhk	2	1	2015-01-14	2015-02-04	27	frozen	E8	2015-02-17	31	2015-02-20	NA	NA	NA	9	2015-04-02	Diff_fail	NA	NA	HPSI0314i-cuhk_2	1	female	0	0
cups_3	cups	3	1	2015-01-14	2015-02-02	24	frozen	KSR	2015-02-24	28	2015-02-27	2015-04-08	NA	2015-04-13	7	2015-04-07	Success	0.977789	0.978836	HPSI1013i-cups_3	1	female	1	0
dard_2	dard	2	1	2015-01-14	2015-03-13	35	frozen	E8	2015-03-27	39	2015-03-30	NA	NA	NA	12	2015-05-20	FC_QC_fail	NA	NA	HPSI0713i-dard_2	0	female	0	0
eika_2	eika	2	1	2015-01-14	2015-02-04	28	frozen	E8	2015-03-02	32	2015-03-05	2015-04-14	2015-04-17	2015-04-13	9	2015-04-20	Success	0.962831	0.969619	HPSI0913i-eika_2	1	male	1	1
eojr_3	eojr	3	1	2015-01-14	2015-03-13	35	frozen	E8	2015-03-27	39	2015-03-30	2015-05-06	2015-05-13	2015-05-05	9	2015-05-12	Success	0.98614	0.99089	HPSI0613i-eojr_3	0	male	1	1
febc_2	febc	2	1	2015-01-14	2015-06-06	35	frozen	E8	2015-07-03	40	2015-07-06	2015-08-04	2015-08-04	2015-08-05	6	2015-08-08	Success	0.973899	0.975509	HPSI0613i-febc_2	0	female	1	1
foop_1	foop	1	1	2015-01-14	2015-05-21	25	frozen	E8	2015-06-08	29	2015-06-11	NA	NA	NA	8	2015-07-24	Diff_fail	NA	NA	HPSI0713i-foop_1	0	female	0	0
hiaf_2	hiaf	2	1	2015-01-14	2015-05-26	26	frozen	E8	2015-06-15	31	2015-06-18	2015-07-22	2015-07-22	2015-07-21	7	2015-07-24	Success	0.994707	1	HPSI1013i-hiaf_2	1	male	1	1
ieki_2	ieki	2	1	2015-01-14	2015-02-04	38	frozen	E8	2015-02-27	42	2015-03-02	2015-04-14	2015-04-17	2015-04-13	11	2015-04-20	Success	0.989294	0.993978	HPSI1113i-ieki_2	1	female	1	1
iicq_1	iicq	1	1	2015-01-14	2015-02-04	35	frozen	KSR	2015-02-23	38	2015-02-26	2015-04-08	NA	2015-04-08	7	2015-04-07	Success	0.976101	0.978807	HPSI0813i-iicq_1	0	female	1	0
iill_1	iill	1	1	2015-01-14	2015-09-09	36	frozen	E8	2015-09-24	40	2015-09-27	2015-11-05	2015-11-05	2015-11-03	7	2015-11-05	Success	0.996838	1	HPSI0813i-iill_1	0	male	1	1
iisa_3	iisa	3	1	2015-01-14	2015-02-23	30	frozen	E8	2015-03-23	35	2015-03-26	2015-05-06	2015-05-13	2015-05-05	8	2015-05-12	Success	0.986971	0.999481	HPSI0114i-iisa_3	1	male	1	1
joxm_1	joxm	1	1	2015-01-14	2015-03-10	32	frozen	E8	2015-03-23	36	2015-03-26	2015-05-06	2015-05-13	2015-05-14	9	2015-05-12	Success	0.929675	0.931796	HPSI0114i-joxm_1	1	female	1	1
kolf_3	kolf	3	1	2015-01-14	2015-03-10	29	frozen	E8	2015-03-28	33	2015-03-31	2015-05-13	NA	NA	9	2015-05-20	Success	NA	NA	HPSI0114i-kolf_3	1	male	1	0
kuxp_1	kuxp	1	1	2015-01-14	2015-05-26	29	frozen	E8	2015-06-18	33	2015-06-21	2015-07-22	2015-07-22	2015-07-21	6	2015-07-24	Success	0.990134	0.990429	HPSI1013i-kuxp_1	1	male	1	1
lexy_1	lexy	1	1	2015-01-14	2015-05-26	30	frozen	E8	2015-06-15	34	2015-06-18	NA	NA	2015-07-30	9	2015-08-04	FC_QC_fail	0.841197	0.851598	HPSI0114i-lexy_1	1	female	0	0
nemb_1	nemb	1	1	2015-01-14	2015-06-06	49	frozen	E8	2015-06-23	44	2015-06-26	2015-07-22	NA	2015-07-27	9	2015-08-11	Success	0.96401	0.97386	HPSI0713i-nemb_1	0	male	1	0
nusw_2	nusw	2	1	2015-01-14	2015-02-02	25	frozen	KSR	2015-02-20	30	2015-02-23	2015-04-01	2015-04-17	NA	9	2015-04-10	Success	NA	NA	HPSI1213i-nusw_2	1	male	1	1
oapg_5	oapg	5	1	2015-01-14	2015-05-26	31	frozen	E8	2015-06-18	36	2015-06-21	2015-07-31	2015-07-31	2015-07-27	7	2015-08-04	Success	0.9632	0.967989	HPSI0913i-oapg_5	1	female	1	1
oefg_2	oefg	2	1	2015-01-14	2015-02-04	37	frozen	KSR	2015-03-17	44	2015-03-20	2015-04-28	2015-05-06	2015-04-28	6	2015-04-29	Success	0.972804	0.982173	HPSI0613i-oefg_2	0	male	1	1
pahc_4	pahc	4	1	2015-01-14	2015-03-10	33	frozen	E8	2015-03-28	37	2015-03-31	2015-05-06	2015-05-06	2015-05-05	9	2015-05-12	Success	0.966647	0.972624	HPSI1213i-pahc_4	1	female	1	1
pamv_3	pamv	3	1	2015-01-14	2015-06-06	34	frozen	E8	2015-06-28	38	2015-07-01	2015-07-31	2015-07-31	2015-07-27	6	2015-08-04	Success	0.995811	1	HPSI1013i-pamv_3	1	male	1	1
podx_1	podx	1	1	2015-01-14	2015-06-06	32	frozen	E8	2015-06-23	36	2015-06-26	2015-07-22	2015-07-22	2015-07-21	5	2015-07-24	Success	0.980584	0.982683	HPSI1113i-podx_1	1	female	1	1
qony_1	qony	1	1	2015-01-14	2015-06-06	30	frozen	E8	2015-06-27	34	2015-06-30	NA	NA	NA	7	2015-08-11	Diff_fail	NA	NA	HPSI0613i-qony_1	0	female	0	0
qorq_1	qorq	1	1	2015-01-14	2015-05-21	28	frozen	E8	2015-06-05	32	2015-06-08	NA	NA	NA	5	2015-07-08	Diff_fail	NA	NA	HPSI1113i-qorq_1	1	male	0	0
robp_3	robp	3	1	2015-01-14	2015-03-09	36	frozen	E8	2015-03-27	40	2015-03-30	NA	NA	NA	7	2015-05-06	Diff_fail	NA	NA	HPSI0813i-robp_3	0	male	0	0
rozh_5	rozh	5	1	2015-01-14	2015-05-21	31	frozen	E8	2015-06-05	35	2015-06-08	NA	NA	2015-07-21	9	2015-07-29	FC_QC_fail	0.835217	0.846651	HPSI0114i-rozh_5	1	female	0	0
ruql_3	ruql	3	1	2015-01-14	2015-02-23	24	frozen	E8	2015-03-13	28	2015-03-16	NA	NA	NA	11	2015-05-15	Diff_fail	NA	NA	HPSI0913i-ruql_3	0	female	0	0
ruyv_1	ruyv	1	1	2015-01-14	2015-02-04	24	frozen	KSR	2015-02-27	27	2015-03-02	2015-04-14	2015-04-17	2015-04-28	9	2015-04-21	Success	0.959751	0.961224	HPSI0713i-ruyv_1	0	female	1	1
sebz_1	sebz	1	1	2015-01-14	2015-03-10	44	frozen	E8	2015-03-30	48	2015-04-02	NA	NA	2015-05-14	8	2015-05-15	Diff_fail	0.854351	0.867237	HPSI1013i-sebz_1	1	female	0	0
sukz_1	sukz	1	1	2015-01-14	2015-03-09	23	frozen	E8	2015-03-27	27	2015-03-30	2015-05-06	2015-05-06	2015-05-05	8	2015-05-08	Success	0.993753	0.999777	HPSI0413i-sukz_1	0	male	1	1
suzg_3	suzg	3	1	2015-01-14	2015-05-21	26	frozen	E8	2015-06-05	30	2015-06-08	NA	NA	NA	8	2015-07-29	Diff_fail	NA	NA	HPSI0513i-suzg_3	0	female	0	0
uimo_1	uimo	1	1	2015-01-14	2015-02-04	39	frozen	E8	2015-02-21	43	2015-02-24	2015-04-01	2015-04-17	2015-04-13	10	2015-04-10	Success	0.985655	0.988036	HPSI0713i-uimo_1	0	female	1	1
vabj_3	vabj	3	1	2015-01-14	2015-09-14	28	frozen	E8	2015-09-30	32	2015-10-03	NA	NA	2015-11-03	7	2015-11-11	FC_QC_fail	0.911439	0.936907	HPSI0114i-vabj_3	1	female	0	0
vass_1	vass	1	1	2015-01-14	2015-03-10	27	frozen	E8	2015-03-26	31	2015-03-29	2015-04-24	2015-04-24	2015-04-23	7	2015-04-29	Success	0.953985	0.981705	HPSI0114i-vass_1	1	female	1	1
veqz_6	veqz	6	1	2015-01-14	2015-03-13	27	frozen	E8	2015-03-30	31	2015-04-02	2015-05-06	2015-05-06	2015-05-05	8	2015-05-12	Success	0.971101	0.973751	HPSI0513i-veqz_6	0	female	1	1
wibj_2	wibj	2	1	2015-01-14	2015-03-10	25	frozen	E8	2015-03-27	29	2015-03-30	2015-04-28	NA	2015-04-23	8	2015-04-29	Success	0.921697	0.924716	HPSI0214i-wibj_2	1	female	1	0
xavk_3	xavk	3	1	2015-01-14	2015-02-23	22	frozen	E8	2015-03-17	26	2015-03-20	NA	NA	2015-04-28	6	2015-04-27	FC_QC_fail	0.780052	0.783019	HPSI0613i-xavk_3	0	female	0	0
xucm_3	xucm	3	1	2015-01-14	2015-03-13	29	frozen	E8	2015-03-30	33	2015-04-02	2015-05-13	2015-05-13	2015-05-14	6	2015-05-12	Success	0.979377	1	HPSI0613i-xucm_3	0	female	1	1
xugn_1	xugn	1	1	2015-01-14	2015-05-21	23	frozen	E8	2015-06-08	27	2015-06-11	2015-07-22	2015-07-22	2015-07-21	8	2015-07-24	Success	0.976954	0.980819	HPSI0314i-xugn_1	1	male	1	1
yemz_1	yemz	1	1	2015-01-14	2015-03-10	25	frozen	E8	2015-03-20	27	2015-03-23	2015-04-24	NA	2015-04-23	9	2015-05-07	Success	0.995252	0.997443	HPSI1013i-yemz_1	1	male	1	0
zaui_3	zaui	3	1	2015-01-14	2015-09-15	33	frozen	E8	2015-10-08	38	2015-10-11	2015-11-18	2015-11-18	2015-11-27	9	2015-11-30	Success	0.892098	0.8994	HPSI0513i-zaui_3	0	female	1	1
bipt_1	bipt	1	1	2015-06-11	2015-08-25	25	frozen	E8	2015-09-19	29	2015-09-22	NA	NA	NA	9	2015-11-06	Diff_fail	NA	NA	HPSI0314i-bipt_1	1	male	0	0
diku_1	diku	1	1	2015-06-11	2015-09-15	33	frozen	E8	2015-10-12	38	2015-10-15	2015-11-13	2015-11-13	2015-11-17	6	2015-11-11	Success	0.991723	0.99396	HPSI0913i-diku_1	1	female	1	1
dons_1	dons	1	1	2015-06-11	2015-06-11	44	frozen	E8	2015-06-30	48	2015-07-03	NA	NA	NA	7	2015-08-11	Diff_fail	NA	NA	HPSI1113i-dons_1	1	female	0	0
eipl_1	eipl	1	1	2015-06-11	2015-06-11	34	frozen	E8	2015-06-27	38	2015-06-30	2015-08-04	2015-08-04	2015-07-30	7	2015-08-08	Success	0.9485	0.961859	HPSI0114i-eipl_1	1	female	1	1
fikt_3	fikt	3	1	2015-09-02	2015-09-14	37	frozen	E8	2015-09-30	41	2015-10-03	2015-11-05	2015-11-05	2015-11-03	5	2015-10-28	Success	0.986044	0.993623	HPSI0114i-fikt_3	1	female	1	1
hayt_1	hayt	1	1	2015-06-11	2015-08-07	42	frozen	E8	2015-09-09	48	2015-09-12	2015-10-09	2015-10-09	2015-10-16	6	2015-10-14	Success	0.950324	0.974237	HPSI1113i-hayt_1	1	male	1	1
heja_1	heja	1	1	2015-06-11	2015-06-11	32	frozen	E8	2015-06-26	36	2015-06-29	2015-08-12	2015-08-12	2015-08-13	9	2015-08-12	Success	0.937208	0.945482	HPSI0214i-heja_1	1	male	1	1
kehc_2	kehc	2	1	2015-06-11	2015-06-11	28	frozen	E8	2015-06-26	32	2015-06-29	NA	NA	2015-08-05	8	2015-08-11	FC_QC_fail	0.841708	0.8578	HPSI0214i-kehc_2	1	female	0	0
kucg_2	kucg	2	1	2015-06-11	2015-08-25	29	frozen	E8	2015-09-18	33	2015-09-21	NA	NA	2015-10-28	8	2015-11-02	FC_QC_fail	0.795571	0.799922	HPSI0214i-kucg_2	1	male	0	0
oevr_3	oevr	3	1	2015-06-11	2015-08-07	35	frozen	E8	2015-08-27	39	2015-08-30	2015-10-14	2015-10-09	2015-10-16	8	2015-10-12	Success	0.948616	0.955235	HPSI0114i-oevr_3	1	male	1	1
pelm_3	pelm	3	1	2015-06-11	2015-06-11	30	frozen	E8	2015-06-30	34	2015-07-03	2015-08-12	2015-08-12	2015-08-13	8	2015-08-12	Success	0.959847	0.961738	HPSI0214i-pelm_3	1	female	1	1
qonc_2	qonc	2	1	2015-06-11	2015-08-20	27	frozen	E8	2015-09-20	33	2015-09-23	NA	NA	NA	7	2015-11-02	Diff_fail	NA	NA	HPSI0314i-qonc_2	1	female	0	0
sojd_3	sojd	3	1	2015-06-11	2015-08-20	23	frozen	E8	2015-09-08	27	2015-09-11	2015-10-14	2015-10-14	2015-10-20	7	2015-10-19	Success	0.892613	0.921887	HPSI0314i-sojd_3	1	female	1	1
uofv_1	uofv	1	1	2015-06-11	2015-08-20	47	frozen	E8	2015-09-19	52	2015-09-22	NA	NA	NA	8	2015-11-05	Diff_fail	NA	NA	HPSI1113i-uofv_1	1	male	0	0
coyi_3	coyi	3	1	2015-09-02	2015-09-09	44	frozen	E8	2015-09-27	48	2015-09-30	2015-11-05	2015-11-05	2015-11-03	7	2015-11-06	Success	0.983438	0.984481	HPSI0913i-coyi_3	0	female	1	1
eiwy_1	eiwy	1	1	2015-09-02	2015-09-15	17	frozen	E8	2015-10-20	23	2015-10-23	2015-12-02	2015-12-02	2015-11-27	7	2015-12-04	Success	0.979667	0.98502	HPSI0214i-eiwy_1	1	female	1	1
fafq_1	fafq	1	1	2015-09-02	2015-09-02	27	frozen	E8	2015-09-13	31	2015-09-16	2015-10-14	2015-10-14	2015-10-16	5	2015-10-14	Success	0.978817	0.999046	HPSI0314i-fafq_1	1	male	1	1
fpdj_3	fpdj	3	1	2013-10-08	2014-07-22	39	frozen	KSR	2014-08-11	43	2014-08-15	2014-09-18	NA	2014-09-19	6	2014-09-23	Success	0.986782	0.992493	HPSI0813i-fpdj_3	0	female	0	0
fpdj_3	fpdj	3	2	2013-10-08	2014-10-03	39	frozen	KSR	2014-10-25	42	2014-10-29	2014-11-26	NA	2014-12-04	8	2014-12-19	Success	0.986522	0.992599	HPSI0813i-fpdj_3	0	female	0	0
fpdj_3	fpdj	3	0	2013-10-08	2014-01-15	39	frozen	KSR	2014-02-03	41	2014-02-07	NA	NA	2014-05-20	15	2014-05-26	FC_QC_fail	0.718304	0.722292	HPSI0813i-fpdj_3	0	female	0	0
guss_1	guss	1	1	2015-09-02	2015-09-15	29	frozen	E8	2015-10-13	33	2015-10-16	2015-11-18	2015-11-18	2015-11-17	5	2015-11-25	Success	0.99383	0.995699	HPSI0813i-guss_1	0	female	1	1
hehd_2	hehd	2	1	2015-09-02	2015-09-02	36	frozen	E8	2015-09-27	41	2015-09-30	2015-11-05	2015-11-05	2015-11-17	8	2015-11-11	Success	0.966033	0.971359	HPSI1213i-hehd_2	1	female	1	1
nukw_1	nukw	1	1	2015-09-02	2015-09-06	43	frozen	E8	2015-09-20	47	2015-09-23	2015-11-05	2015-10-27	2015-11-03	7	2015-11-05	Success	0.980912	0.991354	HPSI0613i-nukw_1	0	female	1	1
qaqx_1	qaqx	1	1	2015-09-02	2015-09-02	16	frozen	E8	2015-09-28	20	2015-10-01	2015-11-18	2015-11-18	2015-11-27	11	2015-11-30	Success	0.979702	0.987287	HPSI0314i-qaqx_1	1	female	0	1
qolg_3	qolg	3	1	2014-10-24	2015-09-14	40	frozen	E8	2015-10-07	44	2015-10-10	2015-11-05	2015-11-13	2015-11-17	6	2015-11-11	Success	0.9882	0.988672	HPSI1113i-qolg_3	1	male	1	1
uaqe_1	uaqe	1	1	2015-09-02	2015-09-09	20	frozen	E8	2015-09-28	24	2015-10-01	NA	2015-10-27	NA	7	2015-11-06	Success	NA	NA	HPSI0813i-uaqe_1	0	female	0	1

## Sheet: Column names
Metadata for all iPSC to macrophage differentiation attempts.
line_id	HipSci short cell line ID.
clone	HipSci iPSC clone number.
replicate	Macrophage differentiation replicate number. Most iPSC lines were differentiated only once, but a handful of lines were differentiated multiple times.
ips_received	Date when iPSC line was received from HipSci.
ips_started	Date when iPSC culture was started.
passage_received	IPSC passage number at the time of receiving the cells.
received_as	Whether cells were received as alive or frozen.
media	Whether IPSCs were initially grown on feeder dependent (KSR) or feeder free (E8) medium.
EB_formation	Date of enbryoid body (EB) formation.
passage_diff	IPSC passage number at the time of EB formation.
diff_start	Date when EBs were transferred to myloid differentiation medium.
salmonella_date	Date of IFNg and Salmonella infection assay for RNA-seq
atac_date	Date of IFNg and Salmonella infection assay for ATAC-seq
flow_date	Date of flow cytometry assay.
medium_changes	Total number of medium changes performed during differentiation.
terminated	Date when macrophage differentiation culture was terminated.
status	QC status for the macrophage differentiation experiment. FC_QC_fail mean low macrophage purity; Diff_fail means failed differentiation; RNA_QC_fail means degraded RNA.
mean_purity	Mean of flow cytometry CD14, CD16 and CD206 purity measurements.
max_purity	Max of flow cytometry CD14, CD16 and CD206 purity measurements.
genotype_id	HipSci cell line id in the VCF file.
open_access	Whether the IPSC line (and sequencing data) is open access (1) or managed access (0).
sex	Biological sex of the iPSC line.
RNA_included	RNA-seq samples included in the final analysis after QC.
ATAC_included	ATAC-seq samples included in the final analysis after QC.
