# Supplementary material for: Genetic effects on promoter usage are highly context-specific and contribute to complex traits
Source: eLife. 2019 Jan 8;8:e41673. doi: 10.7554/eLife.41673 (PMC6349408; doi:10.7554/eLife.41673)
Supplement: Supplementary file 2. [file elife-41673-supp2.xlsx]

## Sheet: IFNg + Salmonella
sample_id	line_id	replicate	condition_name	macrophage_harvest	salmonella_date	ng_ul_mean	rna_extraction	rna_submit	library_pool	chemistry	rna_auto	biosamples_accession
aipt_A	aipt_2	1	naive	2014-06-08	2014-06-14	271.84	2014-06-24	2014-11-18	3226_RNA-1_191114	V4	FALSE	SAMEA103885226
aipt_B	aipt_2	1	IFNg	2014-06-08	2014-06-14	271.84	2014-06-24	2014-11-18	3226_RNA-1_191114	V4	FALSE	SAMEA103885263
aipt_C	aipt_2	1	SL1344	2014-06-08	2014-06-14	271.84	2014-06-24	2014-11-18	3226_RNA-1_191114	V4	FALSE	SAMEA103885044
aipt_D	aipt_2	1	IFNg_SL1344	2014-06-08	2014-06-14	271.84	2014-06-24	2014-11-18	3226_RNA-1_191114	V4	FALSE	SAMEA103885205
auim_A	auim_2	1	naive	2014-11-14	2014-11-20	97.0125	2014-12-04	2015-04-29	3226_RNAauto-290415	V4_auto	TRUE	SAMEA103885018
auim_B	auim_2	1	IFNg	2014-11-14	2014-11-20	97.0125	2014-12-04	2015-04-29	3226_RNAauto-290415	V4_auto	TRUE	SAMEA103884934
auim_C	auim_2	1	SL1344	2014-11-14	2014-11-20	97.0125	2014-12-04	2015-04-29	3226_RNAauto-290415	V4_auto	TRUE	SAMEA103885279
auim_D	auim_2	1	IFNg_SL1344	2014-11-14	2014-11-20	97.0125	2014-12-04	2015-04-29	3226_RNAauto-290415	V4_auto	TRUE	SAMEA103884965
babk_A	babk_2	2	naive	2015-11-25	2015-12-04	50.305	2015-12-07	2015-12-09	3226_RNAauto-091215	V4_auto	TRUE	SAMEA103885125
babk_B	babk_2	2	IFNg	2015-11-25	2015-12-04	50.305	2015-12-07	2015-12-09	3226_RNAauto-091215	V4_auto	TRUE	SAMEA103885304
babk_C	babk_2	2	SL1344	2015-11-25	2015-12-04	50.305	2015-12-07	2015-12-09	3226_RNAauto-091215	V4_auto	TRUE	SAMEA103884985
babk_D	babk_2	2	IFNg_SL1344	2015-11-25	2015-12-04	50.305	2015-12-07	2015-12-09	3226_RNAauto-091215	V4_auto	TRUE	SAMEA103885383
bima_A	bima_1	1	naive	2014-12-05	2014-12-12	91.64	2015-02-05	2015-04-29	3226_RNAauto-290415	V4_auto	TRUE	SAMEA103885122
bima_B	bima_1	1	IFNg	2014-12-05	2014-12-12	91.64	2015-02-05	2015-04-29	3226_RNAauto-290415	V4_auto	TRUE	SAMEA103885158
bima_C	bima_1	1	SL1344	2014-12-05	2014-12-12	91.64	2015-02-05	2015-04-29	3226_RNAauto-290415	V4_auto	TRUE	SAMEA103885174
bima_D	bima_1	1	IFNg_SL1344	2014-12-05	2014-12-12	91.64	2015-02-05	2015-04-29	3226_RNAauto-290415	V4_auto	TRUE	SAMEA103885085
bubh_A	bubh_1	1	naive	2015-03-25	2015-04-01	100.905	2015-05-22	2015-05-26	3226_RNAauto-260515	V4_auto	TRUE	SAMEA103885384
bubh_B	bubh_1	1	IFNg	2015-03-25	2015-04-01	100.905	2015-05-22	2015-05-26	3226_RNAauto-260515	V4_auto	TRUE	SAMEA103885135
bubh_C	bubh_1	1	SL1344	2015-03-25	2015-04-01	100.905	2015-05-22	2015-05-26	3226_RNAauto-260515	V4_auto	TRUE	SAMEA103885298
bubh_D	bubh_1	1	IFNg_SL1344	2015-03-25	2015-04-01	100.905	2015-05-22	2015-05-26	3226_RNAauto-260515	V4_auto	TRUE	SAMEA103885243
cehw_A	cehw_3	1	naive	2014-11-14	2014-11-20	98.1075	2014-11-25	2014-12-09	3226_RNAseq-1_111214	V4	FALSE	SAMEA103885168
cehw_B	cehw_3	1	IFNg	2014-11-14	2014-11-20	98.1075	2014-11-25	2014-12-09	3226_RNAseq-1_111214	V4	FALSE	SAMEA103885325
cehw_C	cehw_3	1	SL1344	2014-11-14	2014-11-20	98.1075	2014-11-25	2014-12-09	3226_RNAseq-1_111214	V4	FALSE	SAMEA103885050
cehw_D	cehw_3	1	IFNg_SL1344	2014-11-14	2014-11-20	98.1075	2014-11-25	2014-12-09	3226_RNAseq-1_111214	V4	FALSE	SAMEA103885150
cicb_A	cicb_3	1	naive	2015-04-17	2015-04-24	146.958	2015-04-25	2015-04-29	3226_RNAauto-290415	V4_auto	TRUE	SAMEA103885048
cicb_B	cicb_3	1	IFNg	2015-04-17	2015-04-24	146.958	2015-04-25	2015-04-29	3226_RNAauto-290415	V4_auto	TRUE	SAMEA103885160
cicb_C	cicb_3	1	SL1344	2015-04-17	2015-04-24	146.958	2015-04-25	2015-04-29	3226_RNAauto-290415	V4_auto	TRUE	SAMEA103885009
cicb_D	cicb_3	1	IFNg_SL1344	2015-04-17	2015-04-24	146.958	2015-04-25	2015-04-29	3226_RNAauto-290415	V4_auto	TRUE	SAMEA103884998
coio_A	coio_2	1	naive	2014-11-14	2014-11-20	162.708	2014-11-25	2014-12-09	3226_RNAseq-2_111214	V4	FALSE	SAMEA103885359
coio_B	coio_2	1	IFNg	2014-11-14	2014-11-20	162.708	2014-11-25	2014-12-09	3226_RNAseq-2_111214	V4	FALSE	SAMEA103885117
coio_D	coio_2	1	IFNg_SL1344	2014-11-14	2014-11-20	162.708	2014-11-25	2014-12-09	3226_RNAseq-2_111214	V4	FALSE	SAMEA103885302
coio_C	coio_2	1	SL1344	2014-11-14	2014-11-20	162.708	2014-11-25	2014-12-09	3226_RNAseq-2_111214	V4	FALSE	SAMEA103885366
coxy_A	coxy_3	1	naive	2014-08-23	2014-08-29	121.575	2014-09-08	2014-11-18	3226_RNA-2_191114	V4	FALSE	SAMEA103885404
coxy_B	coxy_3	1	IFNg	2014-08-23	2014-08-29	121.575	2014-09-08	2014-11-18	3226_RNA-2_191114	V4	FALSE	SAMEA103885187
coxy_C	coxy_3	1	SL1344	2014-08-23	2014-08-29	121.575	2014-09-08	2014-11-18	3226_RNA-2_191114	V4	FALSE	SAMEA103885282
coxy_D	coxy_3	1	IFNg_SL1344	2014-08-23	2014-08-29	121.575	2014-09-08	2014-11-18	3226_RNA-2_191114	V4	FALSE	SAMEA103885057
coyi_A	coyi_3	1	naive	2015-10-28	2015-11-05	87.0125	2015-11-11	2015-12-09	3226_RNAauto-091215	V4_auto	TRUE	SAMEA103885385
coyi_B	coyi_3	1	IFNg	2015-10-28	2015-11-05	87.0125	2015-11-11	2015-12-09	3226_RNAauto-091215	V4_auto	TRUE	SAMEA103884883
coyi_C	coyi_3	1	SL1344	2015-10-28	2015-11-05	87.0125	2015-11-11	2015-12-09	3226_RNAauto-091215	V4_auto	TRUE	SAMEA103885145
coyi_D	coyi_3	1	IFNg_SL1344	2015-10-28	2015-11-05	87.0125	2015-11-11	2015-12-09	3226_RNAauto-091215	V4_auto	TRUE	SAMEA103885220
cuau_A	cuau_2	1	naive	2014-11-14	2014-11-20	153.903	2014-11-25	2014-12-09	3226_RNAseq-1_111214	V4	FALSE	SAMEA103885250
cuau_B	cuau_2	1	IFNg	2014-11-14	2014-11-20	153.903	2014-11-25	2014-12-09	3226_RNAseq-1_111214	V4	FALSE	SAMEA103884882
cuau_C	cuau_2	1	SL1344	2014-11-14	2014-11-20	153.903	2014-11-25	2014-12-09	3226_RNAseq-1_111214	V4	FALSE	SAMEA103885134
cuau_D	cuau_2	1	IFNg_SL1344	2014-11-14	2014-11-20	153.903	2014-11-25	2014-12-09	3226_RNAseq-1_111214	V4	FALSE	SAMEA103884989
cups_A	cups_3	1	naive	2015-04-01	2015-04-08	97.6275	2015-04-25	2015-04-29	3226_RNAauto-290415	V4_auto	TRUE	SAMEA103885092
cups_B	cups_3	1	IFNg	2015-04-01	2015-04-08	97.6275	2015-04-25	2015-04-29	3226_RNAauto-290415	V4_auto	TRUE	SAMEA103885411
cups_C	cups_3	1	SL1344	2015-04-01	2015-04-08	97.6275	2015-04-25	2015-04-29	3226_RNAauto-290415	V4_auto	TRUE	SAMEA103885208
cups_D	cups_3	1	IFNg_SL1344	2015-04-01	2015-04-08	97.6275	2015-04-25	2015-04-29	3226_RNAauto-290415	V4_auto	TRUE	SAMEA103884946
darw_A	darw_2	1	naive	2014-10-30	2014-11-05	70.35	2014-11-06	2014-12-09	3226_RNAseq-1_111214	V4	FALSE	SAMEA103884874
darw_B	darw_2	1	IFNg	2014-10-30	2014-11-05	70.35	2014-11-06	2014-12-09	3226_RNAseq-1_111214	V4	FALSE	SAMEA103885265
darw_C	darw_2	1	SL1344	2014-10-30	2014-11-05	70.35	2014-11-06	2014-12-09	3226_RNAseq-1_111214	V4	FALSE	SAMEA103885271
darw_D	darw_2	1	IFNg_SL1344	2014-10-30	2014-11-05	70.35	2014-11-06	2014-12-09	3226_RNAseq-1_111214	V4	FALSE	SAMEA103884972
debk_A	debk_7	1	naive	2014-11-19	2014-11-26	73.9475	2014-12-07	2014-12-09	3226_RNAseq-2_111214	V4	FALSE	SAMEA103885036
debk_B	debk_7	1	IFNg	2014-11-19	2014-11-26	73.9475	2014-12-07	2014-12-09	3226_RNAseq-2_111214	V4	FALSE	SAMEA103885236
debk_C	debk_7	1	SL1344	2014-11-19	2014-11-26	73.9475	2014-12-07	2014-12-09	3226_RNAseq-2_111214	V4	FALSE	SAMEA103885256
debk_D	debk_7	1	IFNg_SL1344	2014-11-19	2014-11-26	73.9475	2014-12-07	2014-12-09	3226_RNAseq-2_111214	V4	FALSE	SAMEA103885188
diku_A	diku_1	1	naive	2015-11-06	2015-11-13	293.962	2015-11-30	2015-12-09	3226_RNAauto-091215	V4_auto	TRUE	SAMEA103885102
diku_B	diku_1	1	IFNg	2015-11-06	2015-11-13	293.962	2015-11-30	2015-12-09	3226_RNAauto-091215	V4_auto	TRUE	SAMEA103885347
diku_C	diku_1	1	SL1344	2015-11-06	2015-11-13	293.962	2015-11-30	2015-12-09	3226_RNAauto-091215	V4_auto	TRUE	SAMEA103885043
diku_D	diku_1	1	IFNg_SL1344	2015-11-06	2015-11-13	293.962	2015-11-30	2015-12-09	3226_RNAauto-091215	V4_auto	TRUE	SAMEA103885392
eika_A	eika_2	1	naive	2015-04-07	2015-04-14	48.295	2015-04-29	2015-04-29	3226_RNAauto-290415	V4_auto	TRUE	SAMEA103885227
eika_B	eika_2	1	IFNg	2015-04-07	2015-04-14	48.295	2015-04-29	2015-04-29	3226_RNAauto-290415	V4_auto	TRUE	SAMEA103885046
eika_C	eika_2	1	SL1344	2015-04-07	2015-04-14	48.295	2015-04-29	2015-04-29	3226_RNAauto-290415	V4_auto	TRUE	SAMEA103885318
eika_D	eika_2	1	IFNg_SL1344	2015-04-07	2015-04-14	48.295	2015-04-29	2015-04-29	3226_RNAauto-290415	V4_auto	TRUE	SAMEA103884944
eipl_A	eipl_1	1	naive	2015-07-29	2015-08-04	134.518	2015-08-14	2015-09-16	3226_RNAauto-160915	V4_auto	TRUE	SAMEA103885293
eipl_B	eipl_1	1	IFNg	2015-07-29	2015-08-04	134.518	2015-08-14	2015-09-16	3226_RNAauto-160915	V4_auto	TRUE	SAMEA103885339
eipl_C	eipl_1	1	SL1344	2015-07-29	2015-08-04	134.518	2015-08-14	2015-09-16	3226_RNAauto-160915	V4_auto	TRUE	SAMEA103885189
eipl_D	eipl_1	1	IFNg_SL1344	2015-07-29	2015-08-04	134.518	2015-08-14	2015-09-16	3226_RNAauto-160915	V4_auto	TRUE	SAMEA103885207
eiwy_A	eiwy_1	1	naive	2015-11-25	2015-12-02	193.545	2015-12-03	2015-12-09	3226_RNAauto-091215	V4_auto	TRUE	SAMEA103885182
eiwy_B	eiwy_1	1	IFNg	2015-11-25	2015-12-02	193.545	2015-12-03	2015-12-09	3226_RNAauto-091215	V4_auto	TRUE	SAMEA103885136
eiwy_C	eiwy_1	1	SL1344	2015-11-25	2015-12-02	193.545	2015-12-03	2015-12-09	3226_RNAauto-091215	V4_auto	TRUE	SAMEA103885413
eiwy_D	eiwy_1	1	IFNg_SL1344	2015-11-25	2015-12-02	193.545	2015-12-03	2015-12-09	3226_RNAauto-091215	V4_auto	TRUE	SAMEA103884967
eofe_A	eofe_1	1	naive	2014-12-05	2014-12-12	49.185	2015-02-05	2015-04-29	3226_RNAauto-290415	V4_auto	TRUE	SAMEA103885254
eofe_B	eofe_1	1	IFNg	2014-12-05	2014-12-12	49.185	2015-02-05	2015-04-29	3226_RNAauto-290415	V4_auto	TRUE	SAMEA103885033
eofe_C	eofe_1	1	SL1344	2014-12-05	2014-12-12	49.185	2015-02-05	2015-04-29	3226_RNAauto-290415	V4_auto	TRUE	SAMEA103885051
eofe_D	eofe_1	1	IFNg_SL1344	2014-12-05	2014-12-12	49.185	2015-02-05	2015-04-29	3226_RNAauto-290415	V4_auto	TRUE	SAMEA103884917
eojr_A	eojr_3	1	naive	2015-04-29	2015-05-06	136.06	2015-05-17	2015-05-26	3226_RNAauto-260515	V4_auto	TRUE	SAMEA103884955
eojr_B	eojr_3	1	IFNg	2015-04-29	2015-05-06	136.06	2015-05-17	2015-05-26	3226_RNAauto-260515	V4_auto	TRUE	SAMEA103885005
eojr_C	eojr_3	1	SL1344	2015-04-29	2015-05-06	136.06	2015-05-17	2015-05-26	3226_RNAauto-260515	V4_auto	TRUE	SAMEA103885260
eojr_D	eojr_3	1	IFNg_SL1344	2015-04-29	2015-05-06	136.06	2015-05-17	2015-05-26	3226_RNAauto-260515	V4_auto	TRUE	SAMEA103885270
euir_A	euir_2	1	naive	2014-11-28	2014-12-05	110.155	2014-12-08	2015-04-29	3226_RNAauto-290415	V4_auto	TRUE	SAMEA103885034
euir_B	euir_2	1	IFNg	2014-11-28	2014-12-05	110.155	2014-12-08	2015-04-29	3226_RNAauto-290415	V4_auto	TRUE	SAMEA103885365
euir_C	euir_2	1	SL1344	2014-11-28	2014-12-05	110.155	2014-12-08	2015-04-29	3226_RNAauto-290415	V4_auto	TRUE	SAMEA103885163
euir_D	euir_2	1	IFNg_SL1344	2014-11-28	2014-12-05	110.155	2014-12-08	2015-04-29	3226_RNAauto-290415	V4_auto	TRUE	SAMEA103885181
fafq_A	fafq_1	1	naive	2015-10-07	2015-10-14	177.143	2015-11-06	2015-12-09	3226_RNAauto-091215	V4_auto	TRUE	SAMEA103884994
fafq_B	fafq_1	1	IFNg	2015-10-07	2015-10-14	177.143	2015-11-06	2015-12-09	3226_RNAauto-091215	V4_auto	TRUE	SAMEA103885320
fafq_C	fafq_1	1	SL1344	2015-10-07	2015-10-14	177.143	2015-11-06	2015-12-09	3226_RNAauto-091215	V4_auto	TRUE	SAMEA103885372
fafq_D	fafq_1	1	IFNg_SL1344	2015-10-07	2015-10-14	177.143	2015-11-06	2015-12-09	3226_RNAauto-091215	V4_auto	TRUE	SAMEA103885333
febc_C	febc_2	1	SL1344	2015-07-29	2015-08-04	123.582	2015-08-16	2015-09-16	3226_RNAauto-160915	V4_auto	TRUE	SAMEA103885394
febc_B	febc_2	1	IFNg	2015-07-29	2015-08-04	123.582	2015-08-16	2015-09-16	3226_RNAauto-160915	V4_auto	TRUE	SAMEA103885403
febc_A	febc_2	1	naive	2015-07-29	2015-08-04	123.582	2015-08-16	2015-09-16	3226_RNAauto-160915	V4_auto	TRUE	SAMEA103885069
febc_D	febc_2	1	IFNg_SL1344	2015-07-29	2015-08-04	123.582	2015-08-16	2015-09-16	3226_RNAauto-160915	V4_auto	TRUE	SAMEA103885100
ffdm_A	ffdm_3	1	naive	2014-10-06	2014-10-13	52.225	2014-12-04	2014-12-09	3226_RNAseq-1_111214	V4	FALSE	SAMEA103885002
ffdm_B	ffdm_3	1	IFNg	2014-10-06	2014-10-13	52.225	2014-12-04	2014-12-09	3226_RNAseq-1_111214	V4	FALSE	SAMEA103885184
ffdm_C	ffdm_3	1	SL1344	2014-10-06	2014-10-13	52.225	2014-12-04	2014-12-09	3226_RNAseq-1_111214	V4	FALSE	SAMEA103884924
ffdm_D	ffdm_3	1	IFNg_SL1344	2014-10-06	2014-10-13	52.225	2014-12-04	2014-12-09	3226_RNAseq-1_111214	V4	FALSE	SAMEA103885001
fikt_A	fikt_3	1	naive	2015-10-28	2015-11-05	167.542	2015-11-11	2015-12-09	3226_RNAauto-091215	V4_auto	TRUE	SAMEA103885368
fikt_B	fikt_3	1	IFNg	2015-10-28	2015-11-05	167.542	2015-11-11	2015-12-09	3226_RNAauto-091215	V4_auto	TRUE	SAMEA103885218
fikt_C	fikt_3	1	SL1344	2015-10-28	2015-11-05	167.542	2015-11-11	2015-12-09	3226_RNAauto-091215	V4_auto	TRUE	SAMEA103885319
fikt_D	fikt_3	1	IFNg_SL1344	2015-10-28	2015-11-05	167.542	2015-11-11	2015-12-09	3226_RNAauto-091215	V4_auto	TRUE	SAMEA103885004
fpdj_A	fpdj_3	1	naive	2014-09-12	2014-09-18	123.535	2014-09-22	2014-11-18	3226_RNA-2_191114	V4	FALSE	SAMEA103884893
fpdj_A_2	fpdj_3	2	naive	2014-11-19	2014-11-26	94.4575	2014-12-07	2014-12-09	3226_RNAseq-2_111214	V4	FALSE	SAMEA103885346
fpdj_B	fpdj_3	1	IFNg	2014-09-12	2014-09-18	123.535	2014-09-22	2014-11-18	3226_RNA-2_191114	V4	FALSE	SAMEA103885321
fpdj_B_2	fpdj_3	2	IFNg	2014-11-19	2014-11-26	94.4575	2014-12-07	2014-12-09	3226_RNAseq-2_111214	V4	FALSE	SAMEA103885098
fpdj_C	fpdj_3	1	SL1344	2014-09-12	2014-09-18	123.535	2014-09-22	2014-11-18	3226_RNA-2_191114	V4	FALSE	SAMEA103885234
fpdj_C_2	fpdj_3	2	SL1344	2014-11-19	2014-11-26	94.4575	2014-12-07	2014-12-09	3226_RNAseq-2_111214	V4	FALSE	SAMEA103885110
fpdj_D	fpdj_3	1	IFNg_SL1344	2014-09-12	2014-09-18	123.535	2014-09-22	2014-11-18	3226_RNA-2_191114	V4	FALSE	SAMEA103884969
fpdj_D_2	fpdj_3	2	IFNg_SL1344	2014-11-19	2014-11-26	94.4575	2014-12-07	2014-12-09	3226_RNAseq-2_111214	V4	FALSE	SAMEA103885088
fpdl_A_2	fpdl_1	2	naive	2014-05-26	2014-06-03	213.135	2014-06-06	2014-07-13	3226_dUTP_160714_1	V3	FALSE	SAMEA103884888
fpdl_B_2	fpdl_1	2	IFNg	2014-05-26	2014-06-03	213.135	2014-06-06	2014-07-13	3226_dUTP_160714_1	V3	FALSE	SAMEA103885289
fpdl_C_2	fpdl_1	2	SL1344	2014-05-26	2014-06-03	213.135	2014-06-06	2014-07-13	3226_dUTP_160714_1	V3	FALSE	SAMEA103885251
fpdl_D_2	fpdl_1	2	IFNg_SL1344	2014-05-26	2014-06-03	213.135	2014-06-06	2014-07-13	3226_dUTP_160714_1	V3	FALSE	SAMEA103884986
fpdl_A	fpdl_1	1	naive	2014-10-15	2014-10-22	86.47	2014-11-15	2014-11-18	3226_RNA-3_191114	V4	FALSE	SAMEA103885154
fpdl_B	fpdl_1	1	IFNg	2014-10-15	2014-10-22	86.47	2014-11-15	2014-11-18	3226_RNA-3_191114	V4	FALSE	SAMEA103885332
fpdl_C	fpdl_1	1	SL1344	2014-10-15	2014-10-22	86.47	2014-11-15	2014-11-18	3226_RNA-3_191114	V4	FALSE	SAMEA103885011
fpdl_D	fpdl_1	1	IFNg_SL1344	2014-10-15	2014-10-22	86.47	2014-11-15	2014-11-18	3226_RNA-3_191114	V4	FALSE	SAMEA103884977
funp_A	funp_3	1	naive	2014-08-14	2014-08-22	124.543	2014-09-08	2014-11-18	3226_RNA-2_191114	V4	FALSE	SAMEA103885053
funp_B	funp_3	1	IFNg	2014-08-14	2014-08-22	124.543	2014-09-08	2014-11-18	3226_RNA-2_191114	V4	FALSE	SAMEA103885192
funp_C	funp_3	1	SL1344	2014-08-14	2014-08-22	124.543	2014-09-08	2014-11-18	3226_RNA-2_191114	V4	FALSE	SAMEA103884881
funp_D	funp_3	1	IFNg_SL1344	2014-08-14	2014-08-22	124.543	2014-09-08	2014-11-18	3226_RNA-2_191114	V4	FALSE	SAMEA103885025
giuo_A	giuo_4	1	naive	2014-10-30	2014-11-05	279.085	2014-11-06	2014-11-18	3226_RNA-3_191114	V4	FALSE	SAMEA103885240
giuo_B	giuo_4	1	IFNg	2014-10-30	2014-11-05	279.085	2014-11-06	2014-11-18	3226_RNA-3_191114	V4	FALSE	SAMEA103884933
giuo_C	giuo_4	1	SL1344	2014-10-30	2014-11-05	279.085	2014-11-06	2014-11-18	3226_RNA-3_191114	V4	FALSE	SAMEA103885171
giuo_D	giuo_4	1	IFNg_SL1344	2014-10-30	2014-11-05	279.085	2014-11-06	2014-11-18	3226_RNA-3_191114	V4	FALSE	SAMEA103885155
golb_A	golb_1	1	naive	2014-10-15	2014-10-22	249.018	2014-11-15	2014-11-18	3226_RNA-3_191114	V4	FALSE	SAMEA103884921
golb_B	golb_1	1	IFNg	2014-10-15	2014-10-22	249.018	2014-11-15	2014-11-18	3226_RNA-3_191114	V4	FALSE	SAMEA103885296
golb_C	golb_1	1	SL1344	2014-10-15	2014-10-22	249.018	2014-11-15	2014-11-18	3226_RNA-3_191114	V4	FALSE	SAMEA103884941
golb_D	golb_1	1	IFNg_SL1344	2014-10-15	2014-10-22	249.018	2014-11-15	2014-11-18	3226_RNA-3_191114	V4	FALSE	SAMEA103885062
gomv_A	gomv_3	1	naive	2014-10-15	2014-10-22	167.039	2014-11-15	2014-11-18	3226_RNA-3_191114	V4	FALSE	SAMEA103885131
gomv_B	gomv_3	1	IFNg	2014-10-15	2014-10-22	167.039	2014-11-15	2014-11-18	3226_RNA-3_191114	V4	FALSE	SAMEA103885323
gomv_C	gomv_3	1	SL1344	2014-10-15	2014-10-22	167.039	2014-11-15	2014-11-18	3226_RNA-3_191114	V4	FALSE	SAMEA103885246
gomv_D	gomv_3	1	IFNg_SL1344	2014-10-15	2014-10-22	167.039	2014-11-15	2014-11-18	3226_RNA-3_191114	V4	FALSE	SAMEA103884979
guss_A	guss_1	1	naive	2015-11-11	2015-11-18	222.833	2015-12-03	2015-12-09	3226_RNAauto-091215	V4_auto	TRUE	SAMEA103885196
guss_B	guss_1	1	IFNg	2015-11-11	2015-11-18	222.833	2015-12-03	2015-12-09	3226_RNAauto-091215	V4_auto	TRUE	SAMEA103885094
guss_C	guss_1	1	SL1344	2015-11-11	2015-11-18	222.833	2015-12-03	2015-12-09	3226_RNAauto-091215	V4_auto	TRUE	SAMEA103885288
guss_D	guss_1	1	IFNg_SL1344	2015-11-11	2015-11-18	222.833	2015-12-03	2015-12-09	3226_RNAauto-091215	V4_auto	TRUE	SAMEA103885054
hayt_A	hayt_1	1	naive	2015-10-02	2015-10-09	174.68	2015-11-11	2015-12-09	3226_RNAauto-091215	V4_auto	TRUE	SAMEA103885095
hayt_B	hayt_1	1	IFNg	2015-10-02	2015-10-09	174.68	2015-11-11	2015-12-09	3226_RNAauto-091215	V4_auto	TRUE	SAMEA103885198
hayt_C	hayt_1	1	SL1344	2015-10-02	2015-10-09	174.68	2015-11-11	2015-12-09	3226_RNAauto-091215	V4_auto	TRUE	SAMEA103884916
hayt_D	hayt_1	1	IFNg_SL1344	2015-10-02	2015-10-09	174.68	2015-11-11	2015-12-09	3226_RNAauto-091215	V4_auto	TRUE	SAMEA103884875
hehd_A	hehd_2	1	naive	2015-10-28	2015-11-05	98.135	2015-11-06	2015-12-09	3226_RNAauto-091215	V4_auto	TRUE	SAMEA103884877
hehd_B	hehd_2	1	IFNg	2015-10-28	2015-11-05	98.135	2015-11-06	2015-12-09	3226_RNAauto-091215	V4_auto	TRUE	SAMEA103885114
hehd_C	hehd_2	1	SL1344	2015-10-28	2015-11-05	98.135	2015-11-06	2015-12-09	3226_RNAauto-091215	V4_auto	TRUE	SAMEA103884886
hehd_D	hehd_2	1	IFNg_SL1344	2015-10-28	2015-11-05	98.135	2015-11-06	2015-12-09	3226_RNAauto-091215	V4_auto	TRUE	SAMEA103885118
heja_A	heja_1	1	naive	2015-08-05	2015-08-12	76.6925	2015-08-14	2015-09-16	3226_RNAauto-160915	V4_auto	TRUE	SAMEA103884892
heja_B	heja_1	1	IFNg	2015-08-05	2015-08-12	76.6925	2015-08-14	2015-09-16	3226_RNAauto-160915	V4_auto	TRUE	SAMEA103885280
heja_C	heja_1	1	SL1344	2015-08-05	2015-08-12	76.6925	2015-08-14	2015-09-16	3226_RNAauto-160915	V4_auto	TRUE	SAMEA103885352
heja_D	heja_1	1	IFNg_SL1344	2015-08-05	2015-08-12	76.6925	2015-08-14	2015-09-16	3226_RNAauto-160915	V4_auto	TRUE	SAMEA103885179
hiaf_A	hiaf_2	1	naive	2015-07-16	2015-07-22	339.478	2015-08-16	2015-09-16	3226_RNAauto-160915	V4_auto	TRUE	SAMEA103885081
hiaf_B	hiaf_2	1	IFNg	2015-07-16	2015-07-22	339.478	2015-08-16	2015-09-16	3226_RNAauto-160915	V4_auto	TRUE	SAMEA103885388
hiaf_C	hiaf_2	1	SL1344	2015-07-16	2015-07-22	339.478	2015-08-16	2015-09-16	3226_RNAauto-160915	V4_auto	TRUE	SAMEA103885016
hiaf_D	hiaf_2	1	IFNg_SL1344	2015-07-16	2015-07-22	339.478	2015-08-16	2015-09-16	3226_RNAauto-160915	V4_auto	TRUE	SAMEA103885275
hikj_A	hikj_1	1	naive	2014-07-09	2014-07-15	163.555	2014-07-15	2014-11-18	3226_RNA-1_191114	V4	FALSE	SAMEA103885269
hikj_B	hikj_1	1	IFNg	2014-07-09	2014-07-15	163.555	2014-07-15	2014-11-18	3226_RNA-1_191114	V4	FALSE	SAMEA103885327
hikj_C	hikj_1	1	SL1344	2014-07-09	2014-07-15	163.555	2014-07-15	2014-11-18	3226_RNA-1_191114	V4	FALSE	SAMEA103885049
hikj_D	hikj_1	1	IFNg_SL1344	2014-07-09	2014-07-15	163.555	2014-07-15	2014-11-18	3226_RNA-1_191114	V4	FALSE	SAMEA103885348
huls_A	huls_1	1	naive	2014-09-12	2014-09-18	160.49	2014-09-22	2014-11-18	3226_RNA-3_191114	V4	FALSE	SAMEA103885020
huls_B	huls_1	1	IFNg	2014-09-12	2014-09-18	160.49	2014-09-22	2014-11-18	3226_RNA-3_191114	V4	FALSE	SAMEA103885257
huls_C	huls_1	1	SL1344	2014-09-12	2014-09-18	160.49	2014-09-22	2014-11-18	3226_RNA-3_191114	V4	FALSE	SAMEA103885153
huls_D	huls_1	1	IFNg_SL1344	2014-09-12	2014-09-18	160.49	2014-09-22	2014-11-18	3226_RNA-3_191114	V4	FALSE	SAMEA103885309
iasn_A	iasn_3	1	naive	2014-05-26	2014-06-03	136.787	2014-06-09	2014-11-18	3226_RNA-1_191114	V4	FALSE	SAMEA103885338
iasn_B	iasn_3	1	IFNg	2014-05-26	2014-06-03	136.787	2014-06-09	2014-11-18	3226_RNA-1_191114	V4	FALSE	SAMEA103885143
iasn_C	iasn_3	1	SL1344	2014-05-26	2014-06-03	136.787	2014-06-09	2014-11-18	3226_RNA-1_191114	V4	FALSE	SAMEA103885360
iasn_D	iasn_3	1	IFNg_SL1344	2014-05-26	2014-06-03	136.787	2014-06-09	2014-11-18	3226_RNA-1_191114	V4	FALSE	SAMEA103885241
ieki_A	ieki_2	1	naive	2015-04-07	2015-04-14	228.352	2015-04-25	2015-04-29	3226_RNAauto-290415	V4_auto	TRUE	SAMEA103885284
ieki_B	ieki_2	1	IFNg	2015-04-07	2015-04-14	228.352	2015-04-25	2015-04-29	3226_RNAauto-290415	V4_auto	TRUE	SAMEA103885059
ieki_C	ieki_2	1	SL1344	2015-04-07	2015-04-14	228.352	2015-04-25	2015-04-29	3226_RNAauto-290415	V4_auto	TRUE	SAMEA103884898
ieki_D	ieki_2	1	IFNg_SL1344	2015-04-07	2015-04-14	228.352	2015-04-25	2015-04-29	3226_RNAauto-290415	V4_auto	TRUE	SAMEA103885157
iicq_A	iicq_1	1	naive	2015-04-01	2015-04-08	64.63	2015-04-25	2015-04-29	3226_RNAauto-290415	V4_auto	TRUE	SAMEA103885248
iicq_B	iicq_1	1	IFNg	2015-04-01	2015-04-08	64.63	2015-04-25	2015-04-29	3226_RNAauto-290415	V4_auto	TRUE	SAMEA103884976
iicq_C	iicq_1	1	SL1344	2015-04-01	2015-04-08	64.63	2015-04-25	2015-04-29	3226_RNAauto-290415	V4_auto	TRUE	SAMEA103885324
iicq_D	iicq_1	1	IFNg_SL1344	2015-04-01	2015-04-08	64.63	2015-04-25	2015-04-29	3226_RNAauto-290415	V4_auto	TRUE	SAMEA103885144
iill_A	iill_1	1	naive	2015-10-28	2015-11-05	332.618	2015-11-30	2015-12-09	3226_RNAauto-091215	V4_auto	TRUE	SAMEA103885229
iill_B	iill_1	1	IFNg	2015-10-28	2015-11-05	332.618	2015-11-30	2015-12-09	3226_RNAauto-091215	V4_auto	TRUE	SAMEA103885126
iill_C	iill_1	1	SL1344	2015-10-28	2015-11-05	332.618	2015-11-30	2015-12-09	3226_RNAauto-091215	V4_auto	TRUE	SAMEA103885331
iill_D	iill_1	1	IFNg_SL1344	2015-10-28	2015-11-05	332.618	2015-11-30	2015-12-09	3226_RNAauto-091215	V4_auto	TRUE	SAMEA103884954
iisa_A	iisa_3	1	naive	2015-04-29	2015-05-06	262.03	2015-05-22	2015-05-26	3226_RNAauto-260515	V4_auto	TRUE	SAMEA103885195
iisa_B	iisa_3	1	IFNg	2015-04-29	2015-05-06	262.03	2015-05-22	2015-05-26	3226_RNAauto-260515	V4_auto	TRUE	SAMEA103885314
iisa_C	iisa_3	1	SL1344	2015-04-29	2015-05-06	262.03	2015-05-22	2015-05-26	3226_RNAauto-260515	V4_auto	TRUE	SAMEA103885199
iisa_D	iisa_3	1	IFNg_SL1344	2015-04-29	2015-05-06	262.03	2015-05-22	2015-05-26	3226_RNAauto-260515	V4_auto	TRUE	SAMEA103885152
jorr_A	jorr_1	1	naive	2014-12-05	2014-12-12	159.803	2015-02-05	2015-04-29	3226_RNAauto-290415	V4_auto	TRUE	SAMEA103885206
jorr_B	jorr_1	1	IFNg	2014-12-05	2014-12-12	159.803	2015-02-05	2015-04-29	3226_RNAauto-290415	V4_auto	TRUE	SAMEA103885405
jorr_C	jorr_1	1	SL1344	2014-12-05	2014-12-12	159.803	2015-02-05	2015-04-29	3226_RNAauto-290415	V4_auto	TRUE	SAMEA103885379
jorr_D	jorr_1	1	IFNg_SL1344	2014-12-05	2014-12-12	159.803	2015-02-05	2015-04-29	3226_RNAauto-290415	V4_auto	TRUE	SAMEA103885019
joxm_A	joxm_1	1	naive	2015-04-29	2015-05-06	221.72	2015-05-22	2015-05-26	3226_RNAauto-260515	V4_auto	TRUE	SAMEA103885397
joxm_B	joxm_1	1	IFNg	2015-04-29	2015-05-06	221.72	2015-05-22	2015-05-26	3226_RNAauto-260515	V4_auto	TRUE	SAMEA103885072
joxm_C	joxm_1	1	SL1344	2015-04-29	2015-05-06	221.72	2015-05-22	2015-05-26	3226_RNAauto-260515	V4_auto	TRUE	SAMEA103885108
joxm_D	joxm_1	1	IFNg_SL1344	2015-04-29	2015-05-06	221.72	2015-05-22	2015-05-26	3226_RNAauto-260515	V4_auto	TRUE	SAMEA103885109
kaks_A	kaks_3	1	naive	2014-10-15	2014-10-22	117.81	2014-11-15	2014-11-18	3226_RNA-3_191114	V4	FALSE	SAMEA103885268
kaks_B	kaks_3	1	IFNg	2014-10-15	2014-10-22	117.81	2014-11-15	2014-11-18	3226_RNA-3_191114	V4	FALSE	SAMEA103885306
kaks_C	kaks_3	1	SL1344	2014-10-15	2014-10-22	117.81	2014-11-15	2014-11-18	3226_RNA-3_191114	V4	FALSE	SAMEA103885267
kaks_D	kaks_3	1	IFNg_SL1344	2014-10-15	2014-10-22	117.81	2014-11-15	2014-11-18	3226_RNA-3_191114	V4	FALSE	SAMEA103885239
kolf_A	kolf_3	1	naive	2015-05-07	2015-05-13	215.96	2015-05-19	2015-05-26	3226_RNAauto-260515	V4_auto	TRUE	SAMEA103885310
kolf_B	kolf_3	1	IFNg	2015-05-07	2015-05-13	215.96	2015-05-19	2015-05-26	3226_RNAauto-260515	V4_auto	TRUE	SAMEA103885191
kolf_C	kolf_3	1	SL1344	2015-05-07	2015-05-13	215.96	2015-05-19	2015-05-26	3226_RNAauto-260515	V4_auto	TRUE	SAMEA103885258
kolf_D	kolf_3	1	IFNg_SL1344	2015-05-07	2015-05-13	215.96	2015-05-19	2015-05-26	3226_RNAauto-260515	V4_auto	TRUE	SAMEA103885066
kuxp_A	kuxp_1	1	naive	2015-07-16	2015-07-22	295.868	2015-08-18	2015-09-16	3226_RNAauto-160915	V4_auto	TRUE	SAMEA103885017
kuxp_B	kuxp_1	1	IFNg	2015-07-16	2015-07-22	295.868	2015-08-18	2015-09-16	3226_RNAauto-160915	V4_auto	TRUE	SAMEA103885255
kuxp_C	kuxp_1	1	SL1344	2015-07-16	2015-07-22	295.868	2015-08-18	2015-09-16	3226_RNAauto-160915	V4_auto	TRUE	SAMEA103884990
kuxp_D	kuxp_1	1	IFNg_SL1344	2015-07-16	2015-07-22	295.868	2015-08-18	2015-09-16	3226_RNAauto-160915	V4_auto	TRUE	SAMEA103885101
liun_A	liun_2	1	naive	2014-06-08	2014-06-14	209.575	2014-06-24	2014-07-13	3226_dUTP_160714_1	V3	FALSE	SAMEA103885400
liun_B	liun_2	1	IFNg	2014-06-08	2014-06-14	209.575	2014-06-24	2014-07-13	3226_dUTP_160714_1	V3	FALSE	SAMEA103885112
liun_C	liun_2	1	SL1344	2014-06-08	2014-06-14	209.575	2014-06-24	2014-07-13	3226_dUTP_160714_1	V3	FALSE	SAMEA103885130
liun_D	liun_2	1	IFNg_SL1344	2014-06-08	2014-06-14	209.575	2014-06-24	2014-07-13	3226_dUTP_160714_1	V3	FALSE	SAMEA103885090
meqo_A	meqo_3	1	naive	2014-11-14	2014-11-20	45.49	2014-12-04	2015-04-29	3226_RNAauto-290415	V4_auto	TRUE	SAMEA103884870
meqo_B	meqo_3	1	IFNg	2014-11-14	2014-11-20	45.49	2014-12-04	2015-04-29	3226_RNAauto-290415	V4_auto	TRUE	SAMEA103885389
meqo_C	meqo_3	1	SL1344	2014-11-14	2014-11-20	45.49	2014-12-04	2015-04-29	3226_RNAauto-290415	V4_auto	TRUE	SAMEA103885138
meqo_D	meqo_3	1	IFNg_SL1344	2014-11-14	2014-11-20	45.49	2014-12-04	2015-04-29	3226_RNAauto-290415	V4_auto	TRUE	SAMEA103884988
nemb_A	nemb_1	1	naive	2015-07-15	2015-07-22	160.57	2015-08-26	2015-09-16	3226_RNAauto-160915	V4_auto	TRUE	SAMEA103884940
nemb_B	nemb_1	1	IFNg	2015-07-15	2015-07-22	160.57	2015-08-26	2015-09-16	3226_RNAauto-160915	V4_auto	TRUE	SAMEA103885273
nemb_C	nemb_1	1	SL1344	2015-07-15	2015-07-22	160.57	2015-08-26	2015-09-16	3226_RNAauto-160915	V4_auto	TRUE	SAMEA103885249
nemb_D	nemb_1	1	IFNg_SL1344	2015-07-15	2015-07-22	160.57	2015-08-26	2015-09-16	3226_RNAauto-160915	V4_auto	TRUE	SAMEA103885026
nibo_A	nibo_2	1	naive	2015-03-18	2015-03-25	160.773	2015-04-25	2015-04-29	3226_RNAauto-290415	V4_auto	TRUE	SAMEA103885313
nibo_B	nibo_2	1	IFNg	2015-03-18	2015-03-25	160.773	2015-04-25	2015-04-29	3226_RNAauto-290415	V4_auto	TRUE	SAMEA103884981
nibo_C	nibo_2	1	SL1344	2015-03-18	2015-03-25	160.773	2015-04-25	2015-04-29	3226_RNAauto-290415	V4_auto	TRUE	SAMEA103885222
nibo_D	nibo_2	1	IFNg_SL1344	2015-03-18	2015-03-25	160.773	2015-04-25	2015-04-29	3226_RNAauto-290415	V4_auto	TRUE	SAMEA103885375
nukw_A	nukw_1	1	naive	2015-10-28	2015-11-05	147.782	2015-11-17	2015-12-09	3226_RNAauto-091215	V4_auto	TRUE	SAMEA103884927
nukw_B	nukw_1	1	IFNg	2015-10-28	2015-11-05	147.782	2015-11-17	2015-12-09	3226_RNAauto-091215	V4_auto	TRUE	SAMEA103885029
nukw_C	nukw_1	1	SL1344	2015-10-28	2015-11-05	147.782	2015-11-17	2015-12-09	3226_RNAauto-091215	V4_auto	TRUE	SAMEA103885164
nukw_D	nukw_1	1	IFNg_SL1344	2015-10-28	2015-11-05	147.782	2015-11-17	2015-12-09	3226_RNAauto-091215	V4_auto	TRUE	SAMEA103885253
nusw_A	nusw_2	1	naive	2015-03-25	2015-04-01	111.66	2015-04-27	2015-04-29	3226_RNAauto-290415	V4_auto	TRUE	SAMEA103884960
nusw_B	nusw_2	1	IFNg	2015-03-25	2015-04-01	111.66	2015-04-27	2015-04-29	3226_RNAauto-290415	V4_auto	TRUE	SAMEA103885294
nusw_C	nusw_2	1	SL1344	2015-03-25	2015-04-01	111.66	2015-04-27	2015-04-29	3226_RNAauto-290415	V4_auto	TRUE	SAMEA103885316
nusw_D	nusw_2	1	IFNg_SL1344	2015-03-25	2015-04-01	111.66	2015-04-27	2015-04-29	3226_RNAauto-290415	V4_auto	TRUE	SAMEA103885342
oapg_A	oapg_5	1	naive	2015-07-24	2015-07-31	103.115	2015-08-18	2015-09-16	3226_RNAauto-160915	V4_auto	TRUE	SAMEA103885341
oapg_B	oapg_5	1	IFNg	2015-07-24	2015-07-31	103.115	2015-08-18	2015-09-16	3226_RNAauto-160915	V4_auto	TRUE	SAMEA103884894
oapg_C	oapg_5	1	SL1344	2015-07-24	2015-07-31	103.115	2015-08-18	2015-09-16	3226_RNAauto-160915	V4_auto	TRUE	SAMEA103885374
oapg_D	oapg_5	1	IFNg_SL1344	2015-07-24	2015-07-31	103.115	2015-08-18	2015-09-16	3226_RNAauto-160915	V4_auto	TRUE	SAMEA103885137
oarz_A_2	oarz_2	2	naive	2014-10-30	2014-11-05	247.1	2014-11-06	2014-12-09	3226_RNAseq-2_111214	V4	FALSE	SAMEA103885353
oarz_B_2	oarz_2	2	IFNg	2014-10-30	2014-11-05	247.1	2014-11-06	2014-12-09	3226_RNAseq-2_111214	V4	FALSE	SAMEA103885129
oarz_C_2	oarz_2	2	SL1344	2014-10-30	2014-11-05	247.1	2014-11-06	2014-12-09	3226_RNAseq-2_111214	V4	FALSE	SAMEA103885244
oarz_D_2	oarz_2	2	IFNg_SL1344	2014-10-30	2014-11-05	247.1	2014-11-06	2014-12-09	3226_RNAseq-2_111214	V4	FALSE	SAMEA103885361
oefg_A	oefg_2	1	naive	2015-04-21	2015-04-28	366.993	2015-04-29	2015-04-29	3226_RNAauto-290415	V4_auto	TRUE	SAMEA103885194
oefg_B	oefg_2	1	IFNg	2015-04-21	2015-04-28	366.993	2015-04-29	2015-04-29	3226_RNAauto-290415	V4_auto	TRUE	SAMEA103884950
oefg_C	oefg_2	1	SL1344	2015-04-21	2015-04-28	366.993	2015-04-29	2015-04-29	3226_RNAauto-290415	V4_auto	TRUE	SAMEA103885055
oefg_D	oefg_2	1	IFNg_SL1344	2015-04-21	2015-04-28	366.993	2015-04-29	2015-04-29	3226_RNAauto-290415	V4_auto	TRUE	SAMEA103885162
oeoo_A	oeoo_2	1	naive	2014-10-06	2014-10-13	60.4025	2014-12-04	2014-12-09	3226_RNAseq-1_111214	V4	FALSE	SAMEA103885180
oeoo_B	oeoo_2	1	IFNg	2014-10-06	2014-10-13	60.4025	2014-12-04	2014-12-09	3226_RNAseq-1_111214	V4	FALSE	SAMEA103885402
oeoo_C	oeoo_2	1	SL1344	2014-10-06	2014-10-13	60.4025	2014-12-04	2014-12-09	3226_RNAseq-1_111214	V4	FALSE	SAMEA103884900
oeoo_D	oeoo_2	1	IFNg_SL1344	2014-10-06	2014-10-13	60.4025	2014-12-04	2014-12-09	3226_RNAseq-1_111214	V4	FALSE	SAMEA103885283
oevr_A	oevr_3	1	naive	2015-10-07	2015-10-14	63.3275	2015-11-17	2015-12-09	3226_RNAauto-091215	V4_auto	TRUE	SAMEA103884925
oevr_B	oevr_3	1	IFNg	2015-10-07	2015-10-14	63.3275	2015-11-17	2015-12-09	3226_RNAauto-091215	V4_auto	TRUE	SAMEA103885259
oevr_C	oevr_3	1	SL1344	2015-10-07	2015-10-14	63.3275	2015-11-17	2015-12-09	3226_RNAauto-091215	V4_auto	TRUE	SAMEA103885354
oevr_D	oevr_3	1	IFNg_SL1344	2015-10-07	2015-10-14	63.3275	2015-11-17	2015-12-09	3226_RNAauto-091215	V4_auto	TRUE	SAMEA103884891
oomz_A	oomz_2	1	naive	2014-06-08	2014-06-14	187.455	2014-07-09	2014-07-13	3226_dUTP_160714_1	V3	FALSE	SAMEA103884915
oomz_B	oomz_2	1	IFNg	2014-06-08	2014-06-14	187.455	2014-07-09	2014-07-13	3226_dUTP_160714_1	V3	FALSE	SAMEA103885292
oomz_C	oomz_2	1	SL1344	2014-06-08	2014-06-14	187.455	2014-07-09	2014-07-13	3226_dUTP_160714_1	V3	FALSE	SAMEA103885133
oomz_D	oomz_2	1	IFNg_SL1344	2014-06-08	2014-06-14	187.455	2014-07-09	2014-07-13	3226_dUTP_160714_1	V3	FALSE	SAMEA103884926
ougl_A	ougl_3	1	naive	2014-05-26	2014-06-03	108.608	2014-06-09	2014-07-13	3226_dUTP_160714_1	V3	FALSE	SAMEA103884899
ougl_B	ougl_3	1	IFNg	2014-05-26	2014-06-03	108.608	2014-06-09	2014-07-13	3226_dUTP_160714_1	V3	FALSE	SAMEA103885277
ougl_C	ougl_3	1	SL1344	2014-05-26	2014-06-03	108.608	2014-06-09	2014-07-13	3226_dUTP_160714_1	V3	FALSE	SAMEA103885373
ougl_D	ougl_3	1	IFNg_SL1344	2014-05-26	2014-06-03	108.608	2014-06-09	2014-07-13	3226_dUTP_160714_1	V3	FALSE	SAMEA103885169
ougl_A_2	ougl_3	2	naive	2015-03-18	2015-03-25	113.875	2015-04-27	2015-04-29	3226_RNAauto-290415	V4_auto	TRUE	SAMEA103885349
ougl_B_2	ougl_3	2	IFNg	2015-03-18	2015-03-25	113.875	2015-04-27	2015-04-29	3226_RNAauto-290415	V4_auto	TRUE	SAMEA103885000
ougl_C_2	ougl_3	2	SL1344	2015-03-18	2015-03-25	113.875	2015-04-27	2015-04-29	3226_RNAauto-290415	V4_auto	TRUE	SAMEA103885395
ougl_D_2	ougl_3	2	IFNg_SL1344	2015-03-18	2015-03-25	113.875	2015-04-27	2015-04-29	3226_RNAauto-290415	V4_auto	TRUE	SAMEA103885221
pahc_A	pahc_4	1	naive	2015-04-29	2015-05-06	232.768	2015-05-16	2015-05-26	3226_RNAauto-260515	V4_auto	TRUE	SAMEA103885305
pahc_B	pahc_4	1	IFNg	2015-04-29	2015-05-06	232.768	2015-05-16	2015-05-26	3226_RNAauto-260515	V4_auto	TRUE	SAMEA103884913
pahc_C	pahc_4	1	SL1344	2015-04-29	2015-05-06	232.768	2015-05-16	2015-05-26	3226_RNAauto-260515	V4_auto	TRUE	SAMEA103885378
pahc_D	pahc_4	1	IFNg_SL1344	2015-04-29	2015-05-06	232.768	2015-05-16	2015-05-26	3226_RNAauto-260515	V4_auto	TRUE	SAMEA103885010
pamv_A	pamv_3	1	naive	2015-07-24	2015-07-31	258.538	2015-08-16	2015-09-16	3226_RNAauto-160915	V4_auto	TRUE	SAMEA103885329
pamv_B	pamv_3	1	IFNg	2015-07-24	2015-07-31	258.538	2015-08-16	2015-09-16	3226_RNAauto-160915	V4_auto	TRUE	SAMEA103884920
pamv_C	pamv_3	1	SL1344	2015-07-24	2015-07-31	258.538	2015-08-16	2015-09-16	3226_RNAauto-160915	V4_auto	TRUE	SAMEA103885252
pamv_D	pamv_3	1	IFNg_SL1344	2015-07-24	2015-07-31	258.538	2015-08-16	2015-09-16	3226_RNAauto-160915	V4_auto	TRUE	SAMEA103885113
pelm_A	pelm_3	1	naive	2015-08-05	2015-08-12	99.44	2015-08-26	2015-09-16	3226_RNAauto-160915	V4_auto	TRUE	SAMEA103885343
pelm_B	pelm_3	1	IFNg	2015-08-05	2015-08-12	99.44	2015-08-26	2015-09-16	3226_RNAauto-160915	V4_auto	TRUE	SAMEA103885148
pelm_C	pelm_3	1	SL1344	2015-08-05	2015-08-12	99.44	2015-08-26	2015-09-16	3226_RNAauto-160915	V4_auto	TRUE	SAMEA103885075
pelm_D	pelm_3	1	IFNg_SL1344	2015-08-05	2015-08-12	99.44	2015-08-26	2015-09-16	3226_RNAauto-160915	V4_auto	TRUE	SAMEA103884999
peop_A	peop_2	1	naive	2014-05-26	2014-06-03	69.7375	2014-06-06	2014-11-18	3226_RNA-1_191114	V4	FALSE	SAMEA103884880
peop_B	peop_2	1	IFNg	2014-05-26	2014-06-03	69.7375	2014-06-06	2014-11-18	3226_RNA-1_191114	V4	FALSE	SAMEA103885326
peop_C	peop_2	1	SL1344	2014-05-26	2014-06-03	69.7375	2014-06-06	2014-11-18	3226_RNA-1_191114	V4	FALSE	SAMEA103885261
peop_D	peop_2	1	IFNg_SL1344	2014-05-26	2014-06-03	69.7375	2014-06-06	2014-11-18	3226_RNA-1_191114	V4	FALSE	SAMEA103885307
podx_A	podx_1	1	naive	2015-07-15	2015-07-22	93.59	2015-08-14	2015-09-16	3226_RNAauto-160915	V4_auto	TRUE	SAMEA103885111
podx_B	podx_1	1	IFNg	2015-07-15	2015-07-22	93.59	2015-08-14	2015-09-16	3226_RNAauto-160915	V4_auto	TRUE	SAMEA103884919
podx_C	podx_1	1	SL1344	2015-07-15	2015-07-22	93.59	2015-08-14	2015-09-16	3226_RNAauto-160915	V4_auto	TRUE	SAMEA103885276
podx_D	podx_1	1	IFNg_SL1344	2015-07-15	2015-07-22	93.59	2015-08-14	2015-09-16	3226_RNAauto-160915	V4_auto	TRUE	SAMEA103885021
qanu_A	qanu_2	1	naive	2014-06-08	2014-06-14	70.9	2014-07-09	2014-11-18	3226_RNA-1_191114	V4	FALSE	SAMEA103885177
qanu_B	qanu_2	1	IFNg	2014-06-08	2014-06-14	70.9	2014-07-09	2014-11-18	3226_RNA-1_191114	V4	FALSE	SAMEA103885370
qanu_C	qanu_2	1	SL1344	2014-06-08	2014-06-14	70.9	2014-07-09	2014-11-18	3226_RNA-1_191114	V4	FALSE	SAMEA103885367
qanu_D	qanu_2	1	IFNg_SL1344	2014-06-08	2014-06-14	70.9	2014-07-09	2014-11-18	3226_RNA-1_191114	V4	FALSE	SAMEA103885297
qaqx_A	qaqx_1	1	naive	2015-11-11	2015-11-18	488.827	2015-12-07	2015-12-09	3226_RNAauto-091215	V4_auto	TRUE	SAMEA103885262
qaqx_B	qaqx_1	1	IFNg	2015-11-11	2015-11-18	488.827	2015-12-07	2015-12-09	3226_RNAauto-091215	V4_auto	TRUE	SAMEA103885228
qaqx_C	qaqx_1	1	SL1344	2015-11-11	2015-11-18	488.827	2015-12-07	2015-12-09	3226_RNAauto-091215	V4_auto	TRUE	SAMEA103885308
qaqx_D	qaqx_1	1	IFNg_SL1344	2015-11-11	2015-11-18	488.827	2015-12-07	2015-12-09	3226_RNAauto-091215	V4_auto	TRUE	SAMEA103884949
qimz_A	qimz_1	1	naive	2014-07-09	2014-07-15	307.457	2014-07-15	2014-11-18	3226_RNA-2_191114	V4	FALSE	SAMEA103885393
qimz_B	qimz_1	1	IFNg	2014-07-09	2014-07-15	307.457	2014-07-15	2014-11-18	3226_RNA-2_191114	V4	FALSE	SAMEA103885161
qimz_C	qimz_1	1	SL1344	2014-07-09	2014-07-15	307.457	2014-07-15	2014-11-18	3226_RNA-2_191114	V4	FALSE	SAMEA103885123
qimz_D	qimz_1	1	IFNg_SL1344	2014-07-09	2014-07-15	307.457	2014-07-15	2014-11-18	3226_RNA-2_191114	V4	FALSE	SAMEA103884956
qolg_A	qolg_3	1	naive	2015-10-30	2015-11-05	161.173	2015-11-06	2015-12-09	3226_RNAauto-091215	V4_auto	TRUE	SAMEA103885076
qolg_B	qolg_3	1	IFNg	2015-10-30	2015-11-05	161.173	2015-11-06	2015-12-09	3226_RNAauto-091215	V4_auto	TRUE	SAMEA103884992
qolg_C	qolg_3	1	SL1344	2015-10-30	2015-11-05	161.173	2015-11-06	2015-12-09	3226_RNAauto-091215	V4_auto	TRUE	SAMEA103885142
qolg_D	qolg_3	1	IFNg_SL1344	2015-10-30	2015-11-05	161.173	2015-11-06	2015-12-09	3226_RNAauto-091215	V4_auto	TRUE	SAMEA103885382
ruyv_A	ruyv_1	1	naive	2015-04-07	2015-04-14	39.95	2015-04-29	2015-05-26	3226_RNAauto-260515	V4_auto	TRUE	SAMEA103885231
ruyv_B	ruyv_1	1	IFNg	2015-04-07	2015-04-14	39.95	2015-04-29	2015-05-26	3226_RNAauto-260515	V4_auto	TRUE	SAMEA103885121
ruyv_C	ruyv_1	1	SL1344	2015-04-07	2015-04-14	39.95	2015-04-29	2015-05-26	3226_RNAauto-260515	V4_auto	TRUE	SAMEA103884936
ruyv_D	ruyv_1	1	IFNg_SL1344	2015-04-07	2015-04-14	39.95	2015-04-29	2015-05-26	3226_RNAauto-260515	V4_auto	TRUE	SAMEA103885027
sojd_A	sojd_3	1	naive	2015-10-07	2015-10-14	120.713	2015-11-17	2015-12-09	3226_RNAauto-091215	V4_auto	TRUE	SAMEA103885212
sojd_B	sojd_3	1	IFNg	2015-10-07	2015-10-14	120.713	2015-11-17	2015-12-09	3226_RNAauto-091215	V4_auto	TRUE	SAMEA103884971
sojd_C	sojd_3	1	SL1344	2015-10-07	2015-10-14	120.713	2015-11-17	2015-12-09	3226_RNAauto-091215	V4_auto	TRUE	SAMEA103885290
sojd_D	sojd_3	1	IFNg_SL1344	2015-10-07	2015-10-14	120.713	2015-11-17	2015-12-09	3226_RNAauto-091215	V4_auto	TRUE	SAMEA103885281
sukz_A	sukz_1	1	naive	2015-04-29	2015-05-06	213.373	2015-05-19	2015-05-26	3226_RNAauto-260515	V4_auto	TRUE	SAMEA103885035
sukz_B	sukz_1	1	IFNg	2015-04-29	2015-05-06	213.373	2015-05-19	2015-05-26	3226_RNAauto-260515	V4_auto	TRUE	SAMEA103885167
sukz_C	sukz_1	1	SL1344	2015-04-29	2015-05-06	213.373	2015-05-19	2015-05-26	3226_RNAauto-260515	V4_auto	TRUE	SAMEA103885340
sukz_D	sukz_1	1	IFNg_SL1344	2015-04-29	2015-05-06	213.373	2015-05-19	2015-05-26	3226_RNAauto-260515	V4_auto	TRUE	SAMEA103885003
uimo_A	uimo_1	1	naive	2015-03-25	2015-04-01	82.2125	2015-04-25	2015-04-29	3226_RNAauto-290415	V4_auto	TRUE	SAMEA103885377
uimo_B	uimo_1	1	IFNg	2015-03-25	2015-04-01	82.2125	2015-04-25	2015-04-29	3226_RNAauto-290415	V4_auto	TRUE	SAMEA103885128
uimo_C	uimo_1	1	SL1344	2015-03-25	2015-04-01	82.2125	2015-04-25	2015-04-29	3226_RNAauto-290415	V4_auto	TRUE	SAMEA103885371
uimo_D	uimo_1	1	IFNg_SL1344	2015-03-25	2015-04-01	82.2125	2015-04-25	2015-04-29	3226_RNAauto-290415	V4_auto	TRUE	SAMEA103885356
vass_A	vass_1	1	naive	2015-04-17	2015-04-24	121.297	2015-04-27	2015-04-29	3226_RNAauto-290415	V4_auto	TRUE	SAMEA103884943
vass_B	vass_1	1	IFNg	2015-04-17	2015-04-24	121.297	2015-04-27	2015-04-29	3226_RNAauto-290415	V4_auto	TRUE	SAMEA103885245
vass_C	vass_1	1	SL1344	2015-04-17	2015-04-24	121.297	2015-04-27	2015-04-29	3226_RNAauto-290415	V4_auto	TRUE	SAMEA103885175
vass_D	vass_1	1	IFNg_SL1344	2015-04-17	2015-04-24	121.297	2015-04-27	2015-04-29	3226_RNAauto-290415	V4_auto	TRUE	SAMEA103885322
veqz_A	veqz_6	1	naive	2015-04-29	2015-05-06	142.9	2015-05-19	2015-05-26	3226_RNAauto-260515	V4_auto	TRUE	SAMEA103885067
veqz_B	veqz_6	1	IFNg	2015-04-29	2015-05-06	142.9	2015-05-19	2015-05-26	3226_RNAauto-260515	V4_auto	TRUE	SAMEA103884978
veqz_C	veqz_6	1	SL1344	2015-04-29	2015-05-06	142.9	2015-05-19	2015-05-26	3226_RNAauto-260515	V4_auto	TRUE	SAMEA103884912
veqz_D	veqz_6	1	IFNg_SL1344	2015-04-29	2015-05-06	142.9	2015-05-19	2015-05-26	3226_RNAauto-260515	V4_auto	TRUE	SAMEA103885387
voas_A	voas_2	1	naive	2014-11-19	2014-11-26	108.812	2014-12-07	2014-12-09	3226_RNAseq-2_111214	V4	FALSE	SAMEA103884889
voas_B	voas_2	1	IFNg	2014-11-19	2014-11-26	108.812	2014-12-07	2014-12-09	3226_RNAseq-2_111214	V4	FALSE	SAMEA103885139
voas_C	voas_2	1	SL1344	2014-11-19	2014-11-26	108.812	2014-12-07	2014-12-09	3226_RNAseq-2_111214	V4	FALSE	SAMEA103885406
voas_D	voas_2	1	IFNg_SL1344	2014-11-19	2014-11-26	108.812	2014-12-07	2014-12-09	3226_RNAseq-2_111214	V4	FALSE	SAMEA103885201
vorx_A	vorx_1	1	naive	2014-11-14	2014-11-20	283.025	2014-11-25	2014-12-09	3226_RNAseq-1_111214	V4	FALSE	SAMEA103884993
vorx_B	vorx_1	1	IFNg	2014-11-14	2014-11-20	283.025	2014-11-25	2014-12-09	3226_RNAseq-1_111214	V4	FALSE	SAMEA103884935
vorx_C	vorx_1	1	SL1344	2014-11-14	2014-11-20	283.025	2014-11-25	2014-12-09	3226_RNAseq-1_111214	V4	FALSE	SAMEA103885039
vorx_D	vorx_1	1	IFNg_SL1344	2014-11-14	2014-11-20	283.025	2014-11-25	2014-12-09	3226_RNAseq-1_111214	V4	FALSE	SAMEA103884959
wibj_A	wibj_2	1	naive	2015-04-21	2015-04-28	152.66	2015-05-16	2015-05-26	3226_RNAauto-260515	V4_auto	TRUE	SAMEA103884887
wibj_B	wibj_2	1	IFNg	2015-04-21	2015-04-28	152.66	2015-05-16	2015-05-26	3226_RNAauto-260515	V4_auto	TRUE	SAMEA103885058
wibj_C	wibj_2	1	SL1344	2015-04-21	2015-04-28	152.66	2015-05-16	2015-05-26	3226_RNAauto-260515	V4_auto	TRUE	SAMEA103885107
wibj_D	wibj_2	1	IFNg_SL1344	2015-04-21	2015-04-28	152.66	2015-05-16	2015-05-26	3226_RNAauto-260515	V4_auto	TRUE	SAMEA103885211
xucm_A	xucm_3	1	naive	2015-05-07	2015-05-13	216.87	2015-05-16	2015-05-26	3226_RNAauto-260515	V4_auto	TRUE	SAMEA103885056
xucm_B	xucm_3	1	IFNg	2015-05-07	2015-05-13	216.87	2015-05-16	2015-05-26	3226_RNAauto-260515	V4_auto	TRUE	SAMEA103884901
xucm_C	xucm_3	1	SL1344	2015-05-07	2015-05-13	216.87	2015-05-16	2015-05-26	3226_RNAauto-260515	V4_auto	TRUE	SAMEA103885124
xucm_D	xucm_3	1	IFNg_SL1344	2015-05-07	2015-05-13	216.87	2015-05-16	2015-05-26	3226_RNAauto-260515	V4_auto	TRUE	SAMEA103884962
xugn_A	xugn_1	1	naive	2015-07-15	2015-07-22	126.62	2015-08-18	2015-09-16	3226_RNAauto-160915	V4_auto	TRUE	SAMEA103885286
xugn_B	xugn_1	1	IFNg	2015-07-15	2015-07-22	126.62	2015-08-18	2015-09-16	3226_RNAauto-160915	V4_auto	TRUE	SAMEA103884890
xugn_C	xugn_1	1	SL1344	2015-07-15	2015-07-22	126.62	2015-08-18	2015-09-16	3226_RNAauto-160915	V4_auto	TRUE	SAMEA103885173
xugn_D	xugn_1	1	IFNg_SL1344	2015-07-15	2015-07-22	126.62	2015-08-18	2015-09-16	3226_RNAauto-160915	V4_auto	TRUE	SAMEA103885013
yemz_A	yemz_1	1	naive	2015-04-17	2015-04-24	88.2075	2015-04-25	2015-04-29	3226_RNAauto-290415	V4_auto	TRUE	SAMEA103885334
yemz_B	yemz_1	1	IFNg	2015-04-17	2015-04-24	88.2075	2015-04-25	2015-04-29	3226_RNAauto-290415	V4_auto	TRUE	SAMEA103885147
yemz_C	yemz_1	1	SL1344	2015-04-17	2015-04-24	88.2075	2015-04-25	2015-04-29	3226_RNAauto-290415	V4_auto	TRUE	SAMEA103885390
yemz_D	yemz_1	1	IFNg_SL1344	2015-04-17	2015-04-24	88.2075	2015-04-25	2015-04-29	3226_RNAauto-290415	V4_auto	TRUE	SAMEA103885078
yuze_A	yuze_1	1	naive	2014-08-14	2014-08-22	136.748	2014-09-08	2014-11-18	3226_RNA-2_191114	V4	FALSE	SAMEA103885023
yuze_B	yuze_1	1	IFNg	2014-08-14	2014-08-22	136.748	2014-09-08	2014-11-18	3226_RNA-2_191114	V4	FALSE	SAMEA103885216
yuze_C	yuze_1	1	SL1344	2014-08-14	2014-08-22	136.748	2014-09-08	2014-11-18	3226_RNA-2_191114	V4	FALSE	SAMEA103885096
yuze_D	yuze_1	1	IFNg_SL1344	2014-08-14	2014-08-22	136.748	2014-09-08	2014-11-18	3226_RNA-2_191114	V4	FALSE	SAMEA103885071
zaui_A	zaui_3	1	naive	2015-11-11	2015-11-18	144.965	2015-11-30	2015-12-09	3226_RNAauto-091215	V4_auto	TRUE	SAMEA103885381
zaui_B	zaui_3	1	IFNg	2015-11-11	2015-11-18	144.965	2015-11-30	2015-12-09	3226_RNAauto-091215	V4_auto	TRUE	SAMEA103884918
zaui_C	zaui_3	1	SL1344	2015-11-11	2015-11-18	144.965	2015-11-30	2015-12-09	3226_RNAauto-091215	V4_auto	TRUE	SAMEA103885074
zaui_D	zaui_3	1	IFNg_SL1344	2015-11-11	2015-11-18	144.965	2015-11-30	2015-12-09	3226_RNAauto-091215	V4_auto	TRUE	SAMEA103885219
zisa_A	zisa_3	1	naive	2014-07-09	2014-07-15	116.843	2014-07-15	2014-11-18	3226_RNA-1_191114	V4	FALSE	SAMEA103885287
zisa_B	zisa_3	1	IFNg	2014-07-09	2014-07-15	116.843	2014-07-15	2014-11-18	3226_RNA-1_191114	V4	FALSE	SAMEA103884974
zisa_C	zisa_3	1	SL1344	2014-07-09	2014-07-15	116.843	2014-07-15	2014-11-18	3226_RNA-1_191114	V4	FALSE	SAMEA103885178
zisa_D	zisa_3	1	IFNg_SL1344	2014-07-09	2014-07-15	116.843	2014-07-15	2014-11-18	3226_RNA-1_191114	V4	FALSE	SAMEA103885140
zuta_A	zuta_1	1	naive	2014-11-14	2014-11-20	129.37	2014-11-25	2014-12-09	3226_RNAseq-2_111214	V4	FALSE	SAMEA103884922
zuta_B	zuta_1	1	IFNg	2014-11-14	2014-11-20	129.37	2014-11-25	2014-12-09	3226_RNAseq-2_111214	V4	FALSE	SAMEA103885149
zuta_C	zuta_1	1	SL1344	2014-11-14	2014-11-20	129.37	2014-11-25	2014-12-09	3226_RNAseq-2_111214	V4	FALSE	SAMEA103885363
zuta_D	zuta_1	1	IFNg_SL1344	2014-11-14	2014-11-20	129.37	2014-11-25	2014-12-09	3226_RNAseq-2_111214	V4	FALSE	SAMEA103885166

## Sheet: I+S columns
Metadata of the RNA-seq samples from the IFNg + Salmonella study.
sample_id	Sample name
line_id	Short HipSci line identifier.
replicate	Macrophage differentiation replicate number.
condition_name	Name of the experimental condition.
macrophage_harvest	Date when macrophage were harvested for stimulation.
salmonella_date	Date of IFNg and Salmonella infection assay for RNA-seq.
ng_ul_mean	Mean RNA concentration accross four conditions.
rna_extraction	Date of RNA extraction.
rna_submit	Date RNA was submetted for sequencing.
library_pool	Multiplex library pool.
chemistry	Illumina sequencing chemistry used (either V3 or V4)
rna_auto	Whether automatic library construction protocol was used.
biosamples_accession	Sample accession in the EBI BioSamples database. Links directly to ENA or EGA records.

## Sheet: acLDL
sample_id	line_id	replicate	condition_name	acLDL_date	ng_ul_mean	rna_extraction	rna_submit	chemistry	rna_auto	biosamples_accession
AUIM_24h_AcLDL	auim_2	1	AcLDL	2014-11-17	187.5	2014-11-20	2015-02-27	V4	FALSE	SAMEA103885008
AUIM_24h_Ctrl	auim_2	1	Ctrl	2014-11-17	187.5	2014-11-20	2015-02-27	V4	FALSE	SAMEA103884909
BABK_24h_AcLDL	babk_2	1	AcLDL	2014-12-08	74.75	2014-12-12	2015-02-27	V4	FALSE	SAMEA103884945
BABK_24h_Ctrl	babk_2	1	Ctrl	2014-12-08	74.75	2014-12-12	2015-02-27	V4	FALSE	SAMEA103885213
BEZI_24h_AcLDL	bezi_1	1	AcLDL	2015-08-05	67.15	2015-08-24	2015-08-26	V4	FALSE	SAMEA103885330
BEZI_24h_Ctrl	bezi_1	1	Ctrl	2015-08-05	67.15	2015-08-24	2015-08-26	V4	FALSE	SAMEA103884903
BIMA_24h_AcLDL	bima_1	1	AcLDL	2014-12-15	219.95	2015-01-21	2015-02-27	V4	FALSE	SAMEA103885030
BIMA_24h_Ctrl	bima_1	1	Ctrl	2014-12-15	219.95	2015-01-21	2015-02-27	V4	FALSE	SAMEA103884948
BUBH_24h_AcLDL	bubh_1	1	AcLDL	2015-03-31	57.75	2015-04-15	2015-05-12	V4	FALSE	SAMEA103885311
BUBH_24h_Ctrl	bubh_1	1	Ctrl	2015-03-31	57.75	2015-04-15	2015-05-12	V4	FALSE	SAMEA103885115
BULB_24h_AcLDL	bulb_1	1	AcLDL	2014-12-15	97.35	2015-01-21	2015-02-27	V4	FALSE	SAMEA103885362
BULB_24h_Ctrl	bulb_1	1	Ctrl	2014-12-15	97.35	2015-01-21	2015-02-27	V4	FALSE	SAMEA103885376
CEHW_24h_AcLDL	cehw_3	1	AcLDL	2014-11-17	254.75	2014-11-20	2015-02-27	V4	FALSE	SAMEA103885052
CEHW_24h_Ctrl	cehw_3	1	Ctrl	2014-11-17	254.75	2014-11-20	2015-02-27	V4	FALSE	SAMEA103885127
CICB_24h_AcLDL	cicb_3	1	AcLDL	2015-04-28	270.25	2015-05-01	2015-06-16	V4	FALSE	SAMEA103884932
CICB_24h_Ctrl	cicb_3	1	Ctrl	2015-04-28	270.25	2015-05-01	2015-06-16	V4	FALSE	SAMEA103885204
COIO_24h_AcLDL	coio_2	1	AcLDL	2014-11-17	409.95	2014-11-20	2014-11-27	V4	FALSE	SAMEA103884907
COIO_24h_Ctrl	coio_2	1	Ctrl	2014-11-17	409.95	2014-11-20	2014-11-27	V4	FALSE	SAMEA103884996
COYI_24h_AcLDL	coyi_3	1	AcLDL	2015-11-12	84.35	2015-12-10	2015-12-10	V4	FALSE	SAMEA103885091
COYI_24h_Ctrl	coyi_3	1	Ctrl	2015-11-12	84.35	2015-12-10	2015-12-10	V4	FALSE	SAMEA103885264
CUPS_24h_AcLDL	cups_3	1	AcLDL	2015-04-14	222.8	2015-04-15	2015-05-12	V4	FALSE	SAMEA103885103
CUPS_24h_Ctrl	cups_3	1	Ctrl	2015-04-14	222.8	2015-04-15	2015-05-12	V4	FALSE	SAMEA103884895
DARW_24h_AcLDL	darw_2	1	AcLDL	2014-11-17	186.4	2014-11-20	2015-02-27	V4	FALSE	SAMEA103884987
DARW_24h_Ctrl	darw_2	1	Ctrl	2014-11-17	186.4	2014-11-20	2015-02-27	V4	FALSE	SAMEA103884982
DEBK_24h_AcLDL	debk_7	1	AcLDL	2014-12-08	44.7	2014-11-25	2015-02-27	V4	FALSE	SAMEA103884873
DEBK_24h_Ctrl	debk_7	1	Ctrl	2014-12-08	44.7	2014-11-25	2015-02-27	V4	FALSE	SAMEA103885312
DIKU_24h_AcLDL	diku_1	1	AcLDL	2015-11-12	223.6	2015-11-30	2015-12-10	V4	FALSE	SAMEA103885047
DIKU_24h_Ctrl	diku_1	1	Ctrl	2015-11-12	223.6	2015-11-30	2015-12-10	V4	FALSE	SAMEA103885247
EIKA_24h_AcLDL	eika_2	1	AcLDL	2015-04-16	98.55	2015-04-22	2015-05-12	V4	FALSE	SAMEA103885315
EIKA_24h_Ctrl	eika_2	1	Ctrl	2015-04-16	98.55	2015-04-22	2015-05-12	V4	FALSE	SAMEA103885159
EIPL_24h_AcLDL	eipl_1	1	AcLDL	2015-08-05	170.5	2015-08-24	2015-08-26	V4	FALSE	SAMEA103885215
EIPL_24h_Ctrl	eipl_1	1	Ctrl	2015-08-05	170.5	2015-08-24	2015-08-26	V4	FALSE	SAMEA103884937
EIWY_24h_AcLDL	eiwy_1	1	AcLDL	2015-11-26	172.35	2015-12-01	2015-12-10	V4	FALSE	SAMEA103885399
EIWY_24h_Ctrl	eiwy_1	1	Ctrl	2015-11-26	172.35	2015-12-01	2015-12-10	V4	FALSE	SAMEA103885235
EOFE_24h_AcLDL	eofe_1	1	AcLDL	2014-12-08	161.35	2014-12-12	2015-02-27	V4	FALSE	SAMEA103884929
EOFE_24h_Ctrl	eofe_1	1	Ctrl	2014-12-08	161.35	2014-12-12	2015-02-27	V4	FALSE	SAMEA103885193
EOJR_24h_AcLDL	eojr_3	1	AcLDL	2015-05-14	48.75	2015-05-18	2015-06-16	V4	FALSE	SAMEA103885355
EOJR_24h_Ctrl	eojr_3	1	Ctrl	2015-05-14	48.75	2015-05-18	2015-06-16	V4	FALSE	SAMEA103884968
EUIR_24h_AcLDL	euir_2	1	AcLDL	2014-12-08	133.15	2014-12-12	2015-02-27	V4	FALSE	SAMEA103884876
EUIR_24h_Ctrl	euir_2	1	Ctrl	2014-12-08	133.15	2014-12-12	2015-02-27	V4	FALSE	SAMEA103885186
FAFQ_24h_AcLDL	fafq_1	1	AcLDL	2015-10-14	201.8	2015-11-30	2015-12-10	V4	FALSE	SAMEA103884885
FAFQ_24h_Ctrl	fafq_1	1	Ctrl	2015-10-14	201.8	2015-11-30	2015-12-10	V4	FALSE	SAMEA103884994
FEBC_24h_AcLDL	febc_2	1	AcLDL	2015-08-05	170.35	2015-08-24	2015-08-26	V4	FALSE	SAMEA103885336
FEBC_24h_Ctrl	febc_2	1	Ctrl	2015-08-05	170.35	2015-08-24	2015-08-26	V4	FALSE	SAMEA103885272
FIKT_24h_AcLDL	fikt_3	1	AcLDL	2015-11-03	155.35	2015-12-01	2015-12-10	V4	FALSE	SAMEA103885401
FIKT_24h_Ctrl	fikt_3	1	Ctrl	2015-11-03	155.35	2015-12-01	2015-12-10	V4	FALSE	SAMEA103884997
GIUO_24h_AcLDL	giuo_4	1	AcLDL	2014-11-06	367.75	2014-11-07	2014-11-27	V4	FALSE	SAMEA103885183
GIUO_24h_Ctrl	giuo_4	1	Ctrl	2014-11-06	367.75	2014-11-07	2014-11-27	V4	FALSE	SAMEA103885337
GOMV_24h_AcLDL	gomv_3	1	AcLDL	2014-11-13	281	2014-11-20	2015-02-27	V4	FALSE	SAMEA103885398
GOMV_24h_Ctrl	gomv_3	1	Ctrl	2014-11-13	281	2014-11-20	2015-02-27	V4	FALSE	SAMEA103885345
GUSS_24h_AcLDL	guss_1	1	AcLDL	2015-11-17	176.15	2015-12-10	2015-12-10	V4	FALSE	SAMEA103885073
GUSS_24h_Ctrl	guss_1	1	Ctrl	2015-11-17	176.15	2015-12-10	2015-12-10	V4	FALSE	SAMEA103884871
HAYT_24h_AcLDL	hayt_1	1	AcLDL	2015-10-14	280.4	2015-11-30	2015-12-10	V4	FALSE	SAMEA103884953
HAYT_24h_Ctrl	hayt_1	1	Ctrl	2015-10-14	280.4	2015-11-30	2015-12-10	V4	FALSE	SAMEA103885079
HEHD_24h_AcLDL	hehd_2	1	AcLDL	2015-11-12	182.5	2015-12-10	2015-12-10	V4	FALSE	SAMEA103884952
HEHD_24h_Ctrl	hehd_2	1	Ctrl	2015-11-12	182.5	2015-12-10	2015-12-10	V4	FALSE	SAMEA103885141
HEJA_24h_AcLDL	heja_1	1	AcLDL	2015-08-04	41.25	2015-08-24	2015-08-26	V4	FALSE	SAMEA103885028
HEJA_24h_Ctrl	heja_1	1	Ctrl	2015-08-04	41.25	2015-08-24	2015-08-26	V4	FALSE	SAMEA103885061
HIAF_24h_AcLDL	hiaf_2	1	AcLDL	2015-07-23	310.2	2015-08-20	2015-08-26	V4	FALSE	SAMEA103884911
HIAF_24h_Ctrl	hiaf_2	1	Ctrl	2015-07-23	310.2	2015-08-20	2015-08-26	V4	FALSE	SAMEA103885266
IEKI_24h_AcLDL	ieki_2	1	AcLDL	2015-04-16	230.6	2015-04-22	2015-06-16	V4	FALSE	SAMEA103884939
IEKI_24h_Ctrl	ieki_2	1	Ctrl	2015-04-16	230.6	2015-04-22	2015-06-16	V4	FALSE	SAMEA103885089
IICQ_24h_AcLDL	iicq_1	1	AcLDL	2015-04-07	90.6	2015-04-15	2015-05-12	V4	FALSE	SAMEA103884930
IICQ_24h_Ctrl	iicq_1	1	Ctrl	2015-04-07	90.6	2015-04-15	2015-05-12	V4	FALSE	SAMEA103884897
IILL_24h_AcLDL	iill_1	1	AcLDL	2015-10-19	236.35	2015-11-30	2015-12-10	V4	FALSE	SAMEA103885274
IILL_24h_Ctrl	iill_1	1	Ctrl	2015-10-19	236.35	2015-11-30	2015-12-10	V4	FALSE	SAMEA103885077
IISA_24h_AcLDL	iisa_3	1	AcLDL	2015-05-06	288.55	2015-05-18	2015-06-16	V4	FALSE	SAMEA103885225
IISA_24h_Ctrl	iisa_3	1	Ctrl	2015-05-06	288.55	2015-05-18	2015-06-16	V4	FALSE	SAMEA103885195
JORR_24h_AcLDL	jorr_1	1	AcLDL	2014-12-15	179.85	2015-01-21	2015-02-27	V4	FALSE	SAMEA103885328
JORR_24h_Ctrl	jorr_1	1	Ctrl	2014-12-15	179.85	2015-01-21	2015-02-27	V4	FALSE	SAMEA103885083
JOXM_24h_AcLDL	joxm_1	1	AcLDL	2015-05-14	277.4	2015-05-18	2015-06-16	V4	FALSE	SAMEA103884904
JOXM_24h_Ctrl	joxm_1	1	Ctrl	2015-05-14	277.4	2015-05-18	2015-06-16	V4	FALSE	SAMEA103885380
KAKS_24h_AcLDL	kaks_3	1	AcLDL	2014-11-13	273.3	2014-11-20	2015-02-27	V4	FALSE	SAMEA103884958
KAKS_24h_Ctrl	kaks_3	1	Ctrl	2014-11-13	273.3	2014-11-20	2015-02-27	V4	FALSE	SAMEA103885045
KUXP_24h_AcLDL	kuxp_1	1	AcLDL	2015-07-23	307.6	2015-08-20	2015-08-26	V4	FALSE	SAMEA103885203
KUXP_24h_Ctrl	kuxp_1	1	Ctrl	2015-07-23	307.6	2015-08-20	2015-08-26	V4	FALSE	SAMEA103885391
MEQO_24h_AcLDL	meqo_3	1	AcLDL	2014-11-20	75.75	2014-11-25	2015-02-27	V4	FALSE	SAMEA103885015
MEQO_24h_Ctrl	meqo_3	1	Ctrl	2014-11-20	75.75	2014-11-25	2015-02-27	V4	FALSE	SAMEA103884870
NEMB_24h_AcLDL	nemb_1	1	AcLDL	2015-07-27	157.6	2015-08-20	2015-08-26	V4	FALSE	SAMEA103884961
NEMB_24h_Ctrl	nemb_1	1	Ctrl	2015-07-27	157.6	2015-08-20	2015-08-26	V4	FALSE	SAMEA103885364
NIBO_24h_AcLDL	nibo_2	1	AcLDL	2015-03-17	55.05	2015-04-15	2015-05-12	V4	FALSE	SAMEA103885063
NIBO_24h_Ctrl	nibo_2	1	Ctrl	2015-03-17	55.05	2015-04-15	2015-05-12	V4	FALSE	SAMEA103885200
NUKW_24h_AcLDL	nukw_1	1	AcLDL	2015-10-29	150.7	2015-12-01	2015-12-10	V4	FALSE	SAMEA103885223
NUKW_24h_Ctrl	nukw_1	1	Ctrl	2015-10-29	150.7	2015-12-01	2015-12-10	V4	FALSE	SAMEA103885120
NUSW_24h_AcLDL	nusw_2	1	AcLDL	2015-04-07	278.3	2015-04-15	2015-05-12	V4	FALSE	SAMEA103885285
NUSW_24h_Ctrl	nusw_2	1	Ctrl	2015-04-07	278.3	2015-04-15	2015-05-12	V4	FALSE	SAMEA103885031
OAPG_24h_AcLDL	oapg_5	1	AcLDL	2015-07-27	61.4	2015-08-20	2015-08-26	V4	FALSE	SAMEA103884942
OAPG_24h_Ctrl	oapg_5	1	Ctrl	2015-07-27	61.4	2015-08-20	2015-08-26	V4	FALSE	SAMEA103885032
OARZ_24h_AcLDL	oarz_2	2	AcLDL	2014-11-06	359.85	2014-11-07	2014-11-27	V4	FALSE	SAMEA103885224
OARZ_24h_Ctrl	oarz_2	2	Ctrl	2014-11-06	359.85	2014-11-07	2014-11-27	V4	FALSE	SAMEA103885301
OEFG_24h_AcLDL	oefg_2	1	AcLDL	2015-04-28	381.7	2015-05-01	2015-06-16	V4	FALSE	SAMEA103885070
OEFG_24h_Ctrl	oefg_2	1	Ctrl	2015-04-28	381.7	2015-05-01	2015-06-16	V4	FALSE	SAMEA103885194
OEVR_24h_AcLDL	oevr_3	1	AcLDL	2015-10-08	28.8	2015-11-30	2015-12-10	V4	FALSE	SAMEA103884947
OEVR_24h_Ctrl	oevr_3	1	Ctrl	2015-10-08	28.8	2015-11-30	2015-12-10	V4	FALSE	SAMEA103884902
OUGL_24h_AcLDL	ougl_3	2	AcLDL	2015-03-17	30	2015-04-15	2015-05-12	V4	FALSE	SAMEA103884964
OUGL_24h_Ctrl	ougl_3	2	Ctrl	2015-03-17	30	2015-04-15	2015-05-12	V4	FALSE	SAMEA103885170
PAHC_24h_AcLDL	pahc_4	1	AcLDL	2015-05-06	197.65	2015-05-18	2015-06-16	V4	FALSE	SAMEA103885335
PAHC_24h_Ctrl	pahc_4	1	Ctrl	2015-05-06	197.65	2015-05-18	2015-06-16	V4	FALSE	SAMEA103885305
PAMV_24h_AcLDL	pamv_3	1	AcLDL	2015-07-27	258.5	2015-08-20	2015-08-26	V4	FALSE	SAMEA103885097
PAMV_24h_Ctrl	pamv_3	1	Ctrl	2015-07-27	258.5	2015-08-20	2015-08-26	V4	FALSE	SAMEA103885022
PELM_24h_AcLDL	pelm_3	1	AcLDL	2015-08-04	193.8	2015-08-24	2015-08-26	V4	FALSE	SAMEA103885099
PELM_24h_Ctrl	pelm_3	1	Ctrl	2015-08-04	193.8	2015-08-24	2015-08-26	V4	FALSE	SAMEA103885230
PIUN_24h_AcLDL	piun_3	2	AcLDL	2015-03-17	60.55	2015-04-15	2015-05-12	V4	FALSE	SAMEA103884975
PIUN_24h_Ctrl	piun_3	2	Ctrl	2015-03-17	60.55	2015-04-15	2015-05-12	V4	FALSE	SAMEA103884963
PODX_24h_AcLDL	podx_1	1	AcLDL	2015-07-23	118.65	2015-08-24	2015-08-26	V4	FALSE	SAMEA103885303
PODX_24h_Ctrl	podx_1	1	Ctrl	2015-07-23	118.65	2015-08-24	2015-08-26	V4	FALSE	SAMEA103885386
QAQX_24h_AcLDL	qaqx_1	1	AcLDL	2015-11-26	269.15	2015-12-01	2015-12-10	V4	FALSE	SAMEA103884931
QAQX_24h_Ctrl	qaqx_1	1	Ctrl	2015-11-26	269.15	2015-12-01	2015-12-10	V4	FALSE	SAMEA103885156
QOLG_24h_AcLDL	qolg_3	1	AcLDL	2015-11-12	179.4	2015-12-10	2015-12-10	V4	FALSE	SAMEA103885210
QOLG_24h_Ctrl	qolg_3	1	Ctrl	2015-11-12	179.4	2015-12-10	2015-12-10	V4	FALSE	SAMEA103885233
RIIV_24h_AcLDL	riiv_1	1	AcLDL	2014-12-08	93.85	2014-12-12	2015-02-27	V4	FALSE	SAMEA103885350
RIIV_24h_Ctrl	riiv_1	1	Ctrl	2014-12-08	93.85	2014-12-12	2015-02-27	V4	FALSE	SAMEA103885082
RUYV_24h_AcLDL	ruyv_1	1	AcLDL	2015-04-15	95.8	2015-05-01	2015-06-16	V4	FALSE	SAMEA103885132
RUYV_24h_Ctrl	ruyv_1	1	Ctrl	2015-04-15	95.8	2015-05-01	2015-06-16	V4	FALSE	SAMEA103884991
SOJD_24h_AcLDL	sojd_3	1	AcLDL	2015-10-19	58.9	2015-11-30	2015-12-10	V4	FALSE	SAMEA103884884
SOJD_24h_Ctrl	sojd_3	1	Ctrl	2015-10-19	58.9	2015-11-30	2015-12-10	V4	FALSE	SAMEA103885409
SUKZ_24h_AcLDL	sukz_1	1	AcLDL	2015-05-06	230.05	2015-05-18	2015-06-16	V4	FALSE	SAMEA103885038
SUKZ_24h_Ctrl	sukz_1	1	Ctrl	2015-05-06	230.05	2015-05-18	2015-06-16	V4	FALSE	SAMEA103885035
UAHF_24h_AcLDL	uahf_3	1	AcLDL	2014-11-17	39.1	2014-11-20	2015-06-16	V4	FALSE	SAMEA103885065
UAHF_24h_Ctrl	uahf_3	1	Ctrl	2014-11-17	39.1	2014-11-20	2015-06-16	V4	FALSE	SAMEA103885146
UIMO_24h_AcLDL	uimo_1	1	AcLDL	2015-03-31	100.75	2015-04-15	2015-05-12	V4	FALSE	SAMEA103885209
UIMO_24h_Ctrl	uimo_1	1	Ctrl	2015-03-31	100.75	2015-04-15	2015-05-12	V4	FALSE	SAMEA103885105
VASS_24h_AcLDL	vass_1	1	AcLDL	2015-04-28	129.2	2015-05-01	2015-06-16	V4	FALSE	SAMEA103885042
VASS_24h_Ctrl	vass_1	1	Ctrl	2015-04-28	129.2	2015-05-01	2015-06-16	V4	FALSE	SAMEA103884878
VEQZ_24h_AcLDL	veqz_6	1	AcLDL	2015-05-06	208.5	2015-05-18	2015-06-16	V4	FALSE	SAMEA103885214
VEQZ_24h_Ctrl	veqz_6	1	Ctrl	2015-05-06	208.5	2015-05-18	2015-06-16	V4	FALSE	SAMEA103885067
VOAS_24h_AcLDL	voas_2	1	AcLDL	2014-11-20	128.75	2014-11-25	2015-02-27	V4	FALSE	SAMEA103885291
VOAS_24h_Ctrl	voas_2	1	Ctrl	2014-11-20	128.75	2014-11-25	2015-02-27	V4	FALSE	SAMEA103884908
VORX_24h_AcLDL	vorx_1	1	AcLDL	2014-11-20	204.75	2014-11-25	2015-02-27	V4	FALSE	SAMEA103884872
VORX_24h_Ctrl	vorx_1	1	Ctrl	2014-11-20	204.75	2014-11-25	2015-02-27	V4	FALSE	SAMEA103884993
XEGX_24h_AcLDL	xegx_2	1	AcLDL	2014-12-15	124.2	2015-01-21	2015-02-27	V4	FALSE	SAMEA103885202
XEGX_24h_Ctrl	xegx_2	1	Ctrl	2014-12-15	124.2	2015-01-21	2015-02-27	V4	FALSE	SAMEA103884995
XUCM_24h_AcLDL	xucm_3	1	AcLDL	2015-05-14	233.5	2015-05-18	2015-06-16	V4	FALSE	SAMEA103885064
XUCM_24h_Ctrl	xucm_3	1	Ctrl	2015-05-14	233.5	2015-05-18	2015-06-16	V4	FALSE	SAMEA103885317
XUGN_24h_AcLDL	xugn_1	1	AcLDL	2015-07-23	267.45	2015-08-20	2015-08-26	V4	FALSE	SAMEA103885278
XUGN_24h_Ctrl	xugn_1	1	Ctrl	2015-07-23	267.45	2015-08-20	2015-08-26	V4	FALSE	SAMEA103885357
YEMZ_24h_AcLDL	yemz_1	1	AcLDL	2015-04-28	186.65	2015-05-01	2015-06-16	V4	FALSE	SAMEA103885116
YEMZ_24h_Ctrl	yemz_1	1	Ctrl	2015-04-28	186.65	2015-05-01	2015-06-16	V4	FALSE	SAMEA103884914
ZAUI_24h_AcLDL	zaui_3	1	AcLDL	2015-11-26	179.4	2015-12-01	2015-12-10	V4	FALSE	SAMEA103884973
ZAUI_24h_Ctrl	zaui_3	1	Ctrl	2015-11-26	179.4	2015-12-01	2015-12-10	V4	FALSE	SAMEA103885351
ZUTA_24h_AcLDL	zuta_1	1	AcLDL	2014-11-06	134.65	2014-11-07	2015-02-27	V4	FALSE	SAMEA103885410
ZUTA_24h_Ctrl	zuta_1	1	Ctrl	2014-11-06	134.65	2014-11-07	2015-02-27	V4	FALSE	SAMEA103885037

## Sheet: acLDL columns
Metadata of the RNA-seq samples from the acLDL study.
sample_id	Sample name
line_id	Short HipSci line identifier.
replicate	Macrophage differentiation replicate number.
condition_name	Name of the experimental condition.
acLDL_date	Date of the acLDL stimulation assay for RNA-seq.
ng_ul_mean	Mean RNA concentration accross four conditions.
rna_extraction	Date of RNA extraction.
rna_submit	Date RNA was submetted for sequencing.
chemistry	Illumina sequencing chemistry used (either V3 or V4)
rna_auto	Whether automatic library construction protocol was used.
biosamples_accession	Sample accession in the EBI BioSamples database. Links directly to ENA or EGA records.
