# Supplementary figures and images for: Genetic effects on promoter usage are highly context-specific and contribute to complex traits
Source: eLife journal article supplement (doi:10.7554/elife.41673), 2019-01-08

# A

## Original promoters of the IRF2 gene

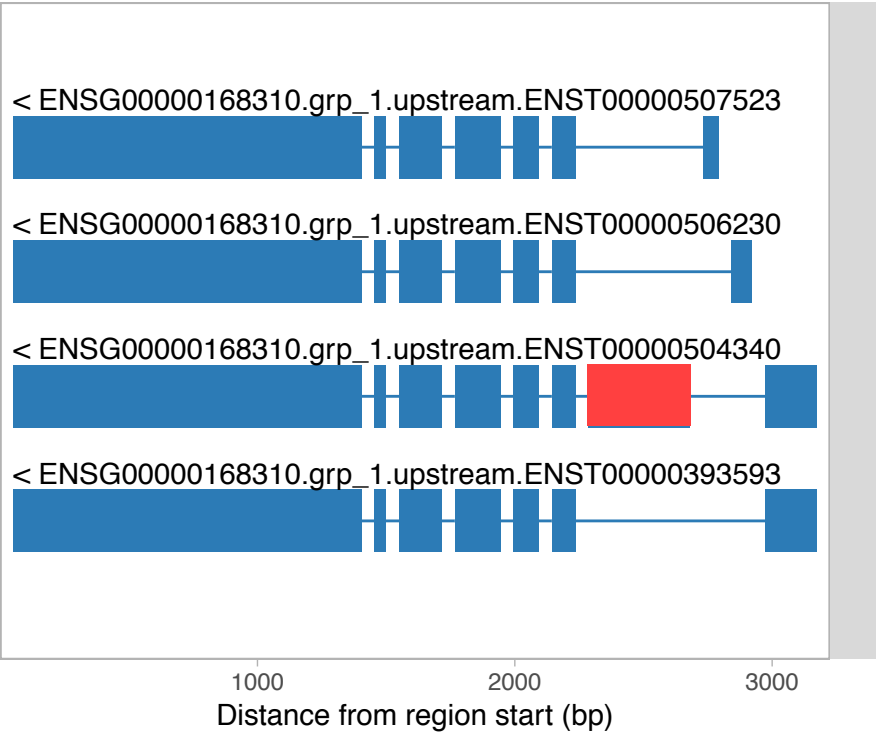

# B

## IRF2 promoters without alternative middle exons

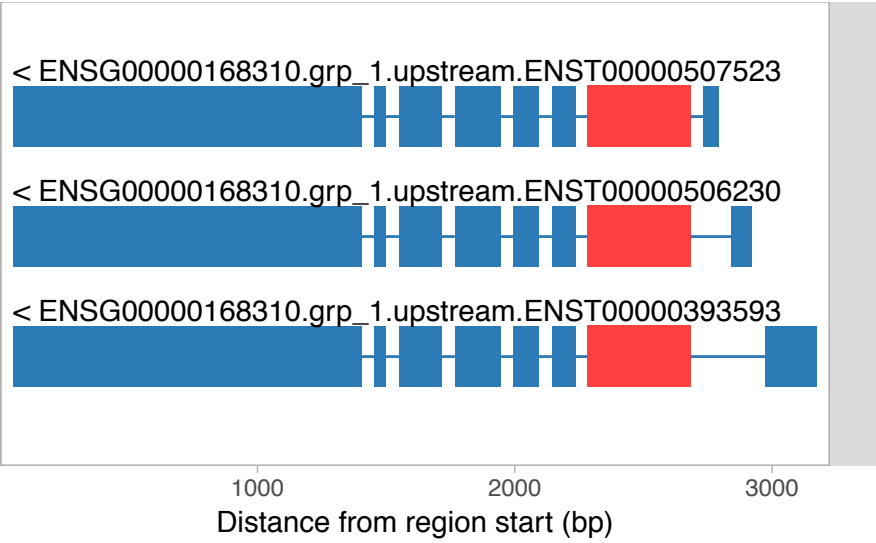

Supplement: supp [file elife-41673-supp-v1.zip]

Number of transcripts

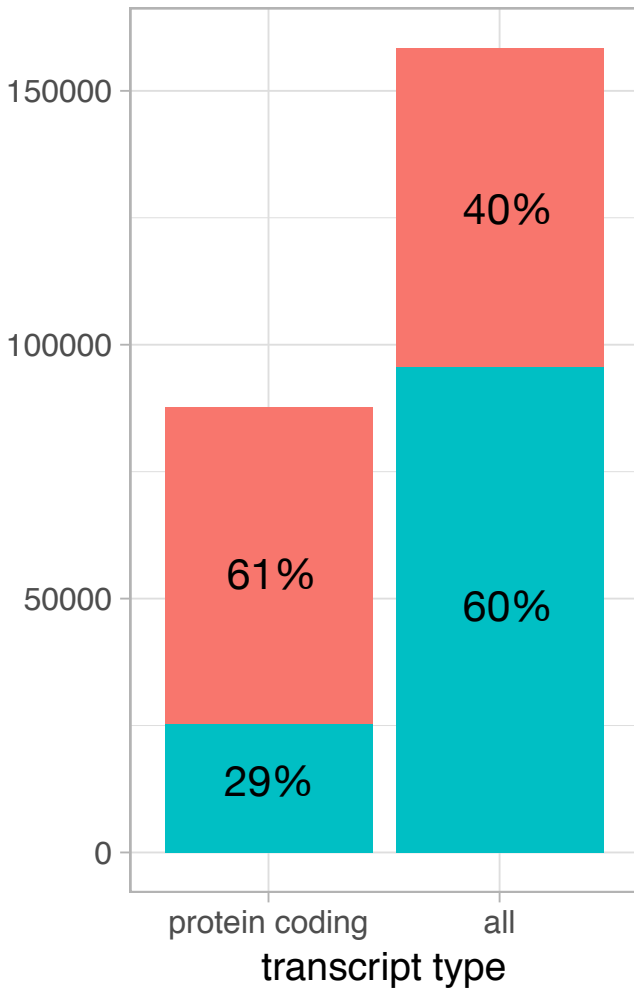

is\_truncated

FALSE

TRUE

Supplement: supp [file elife-41673-supp-v1.zip]

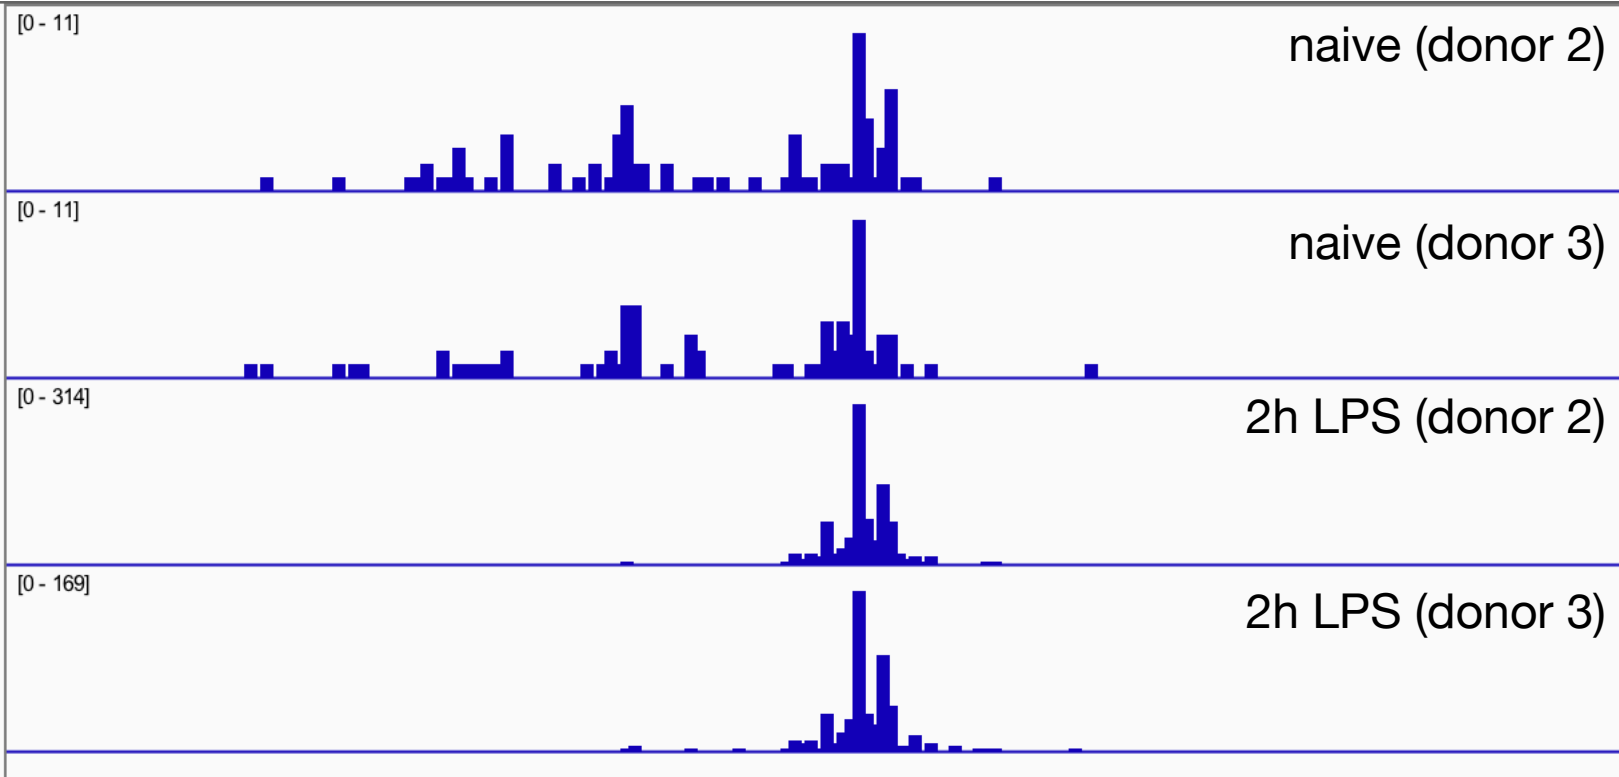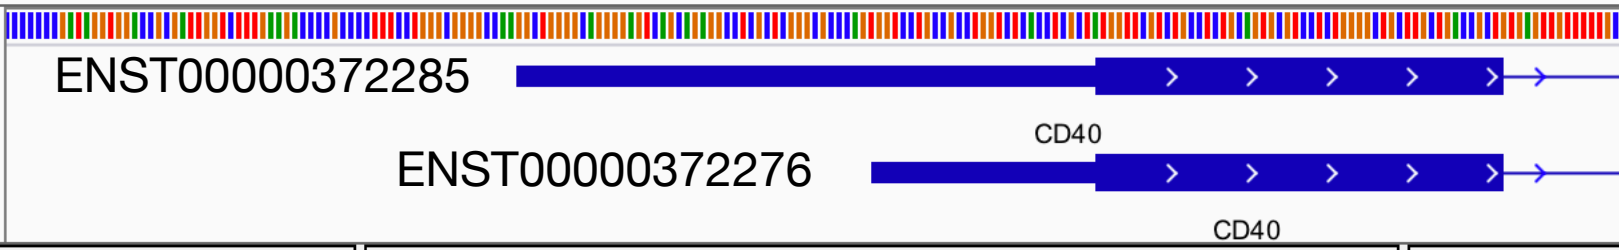

Supplement: supp [file elife-41673-supp-v1.zip]

Fraction of genes with multiple tuQTLs

Leafcutter

0.3

0.2

0.1

0.0

None

0.8

0.2

$R^2$  threshold

txrevise

None

0.8

0.2

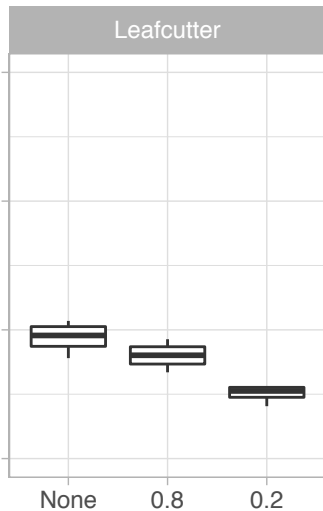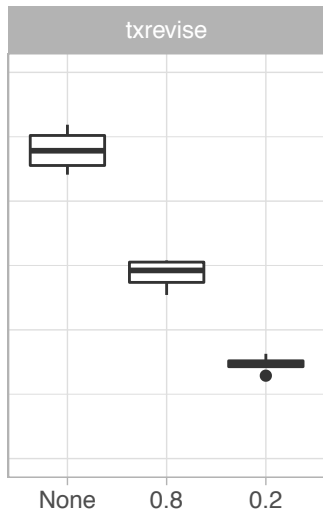

Supplement: supp [file elife-41673-supp-v1.zip]

A

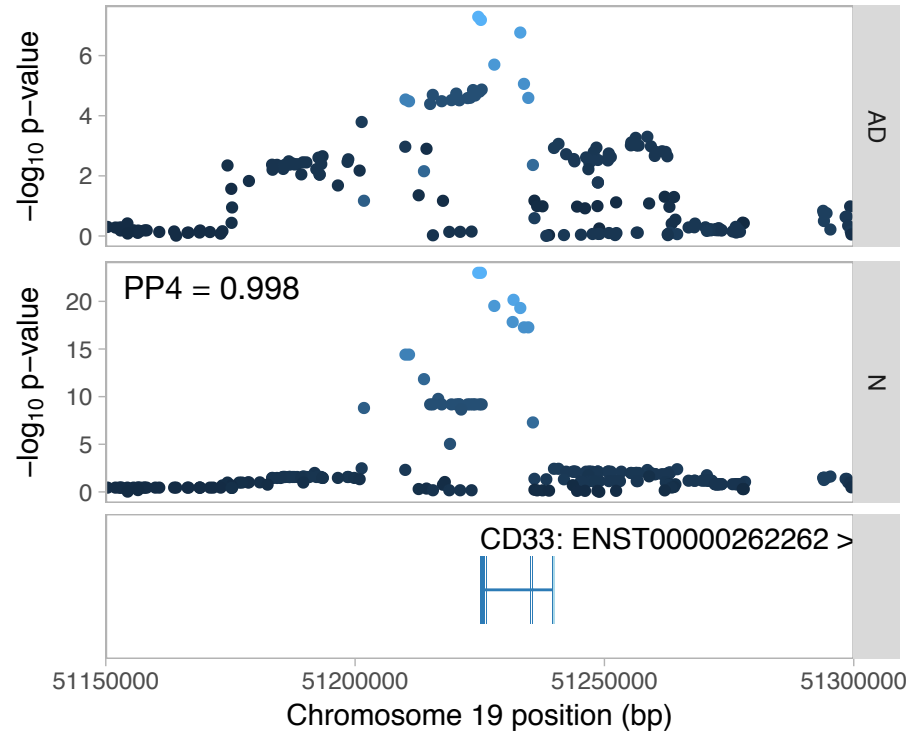

B

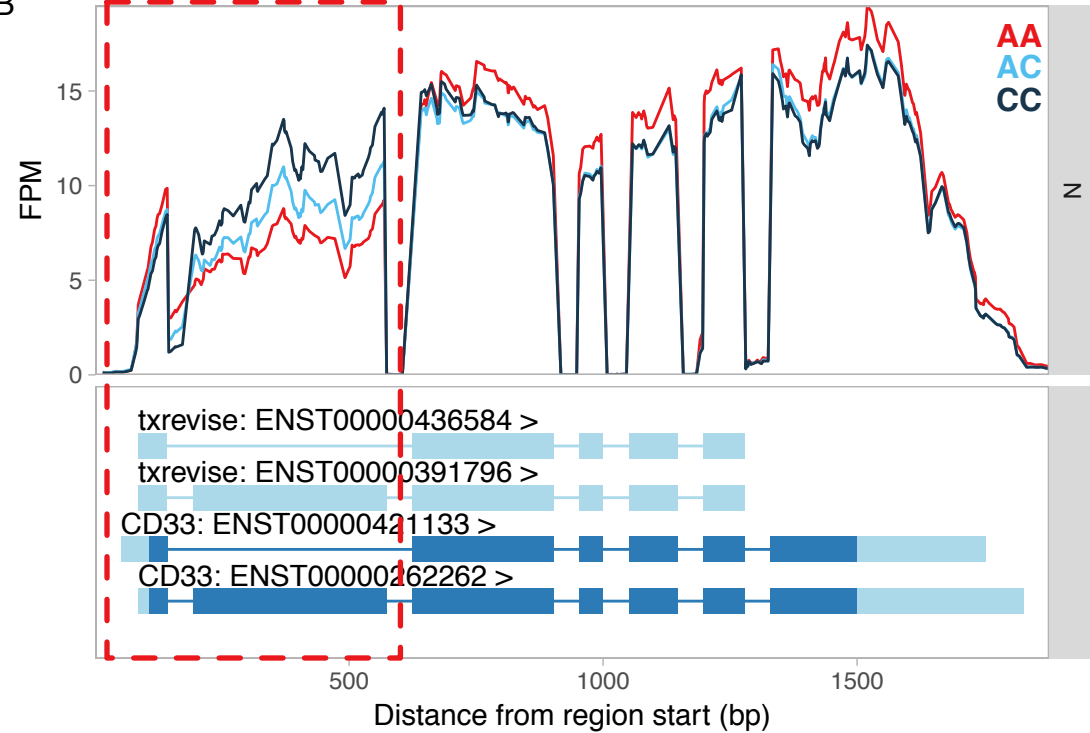

C

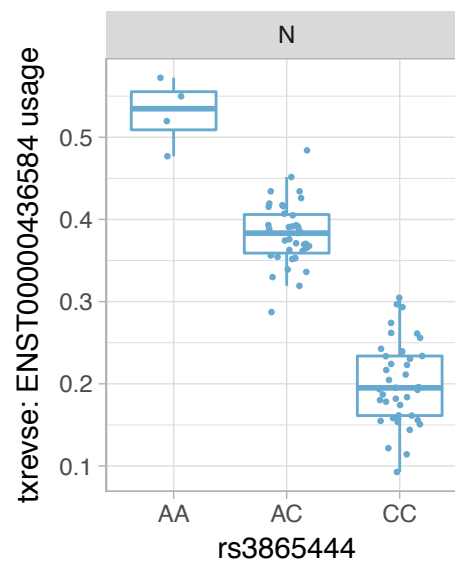

D

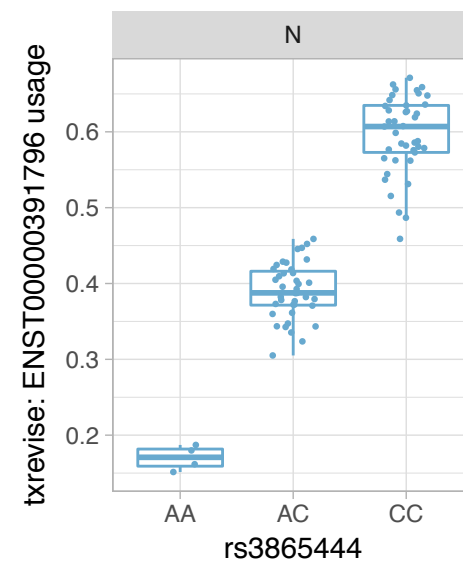

Supplement: supp [file elife-41673-supp-v1.zip]

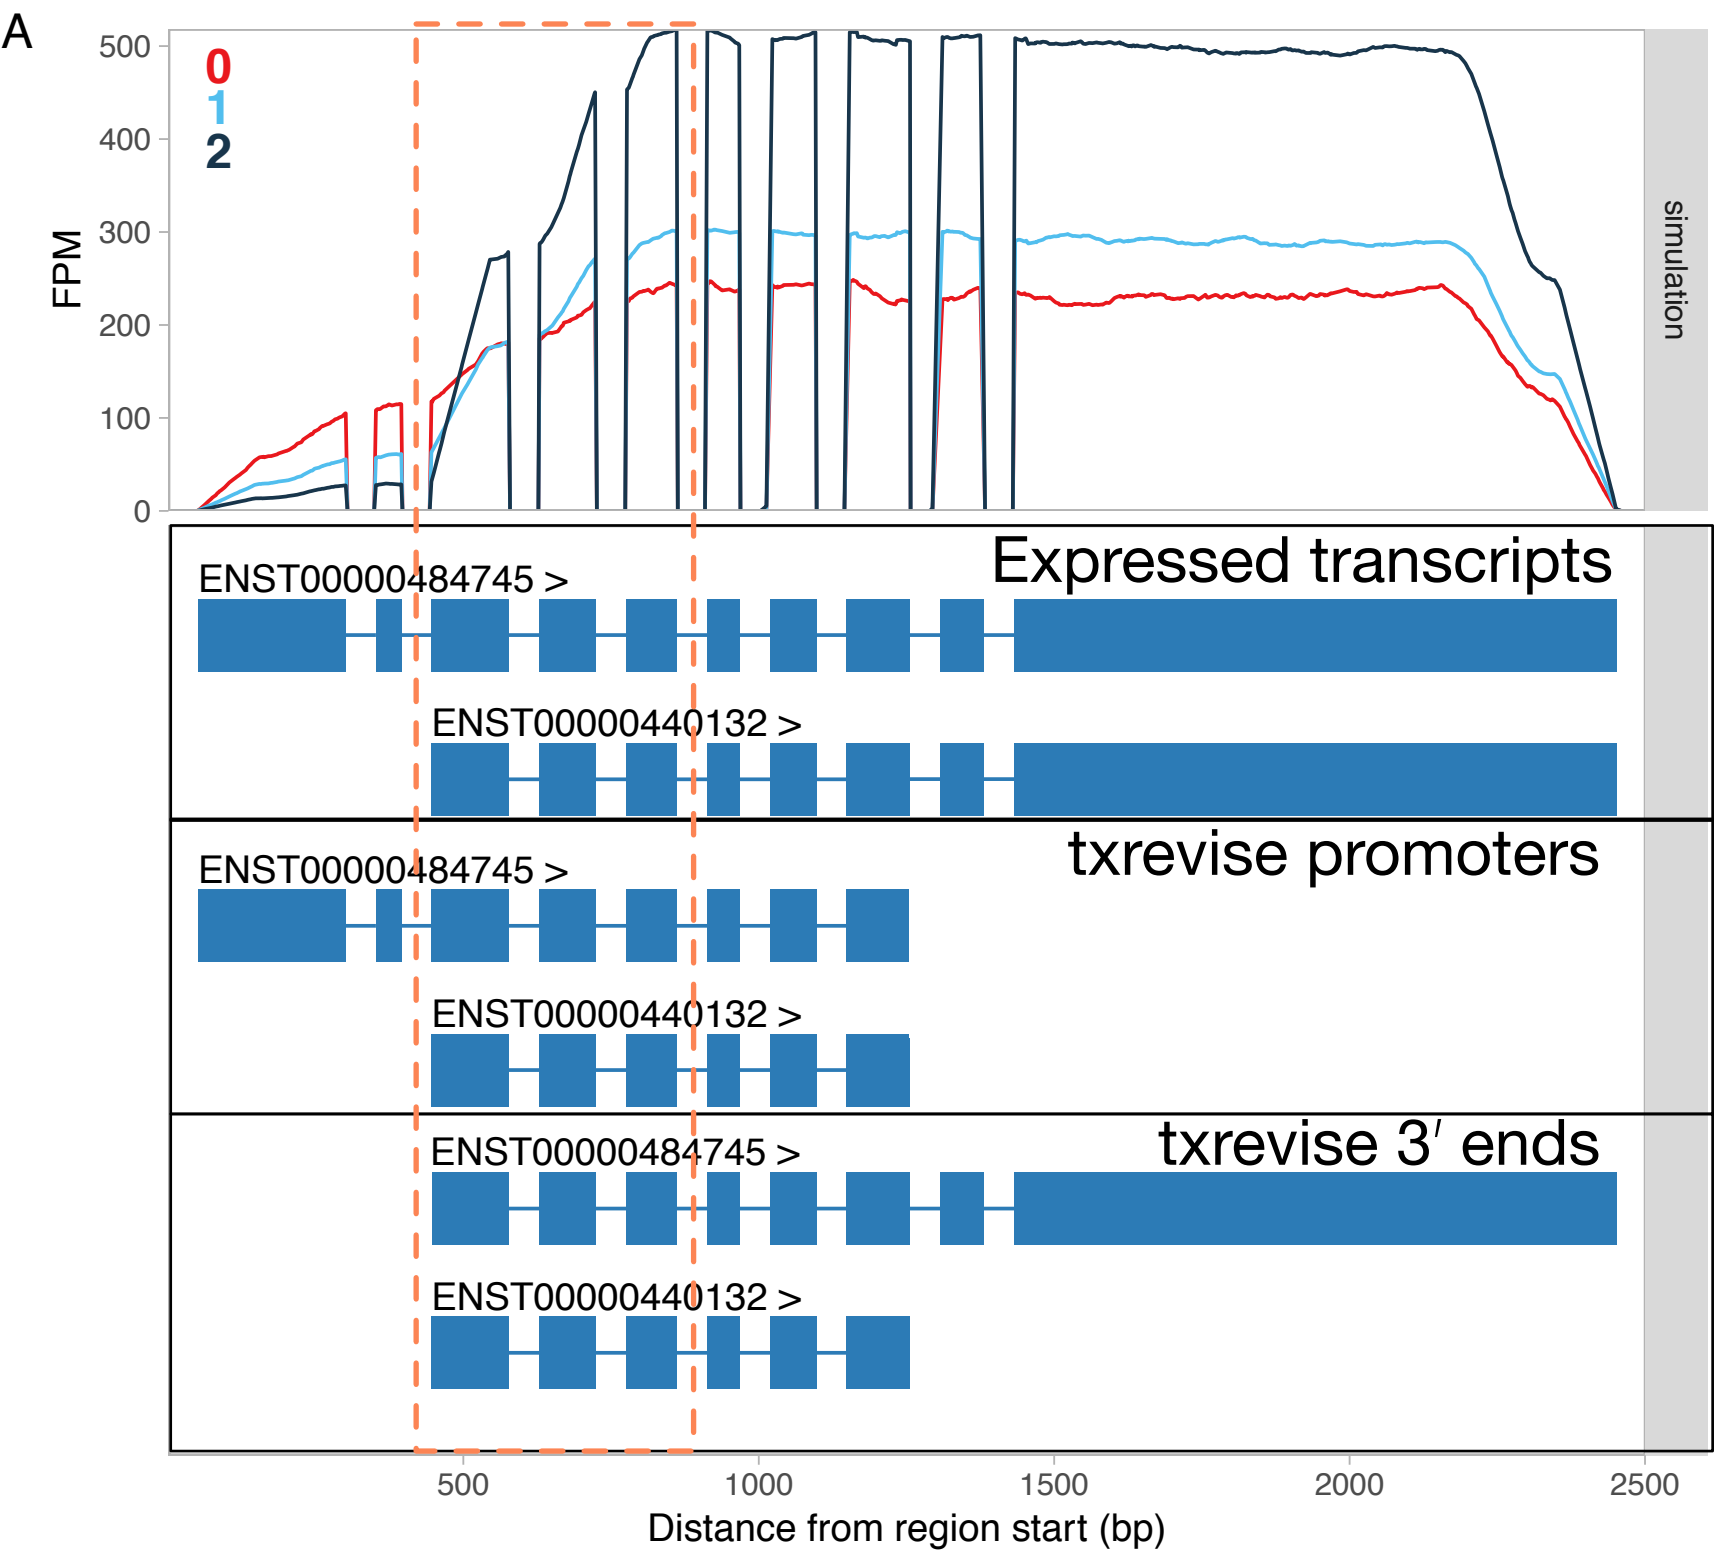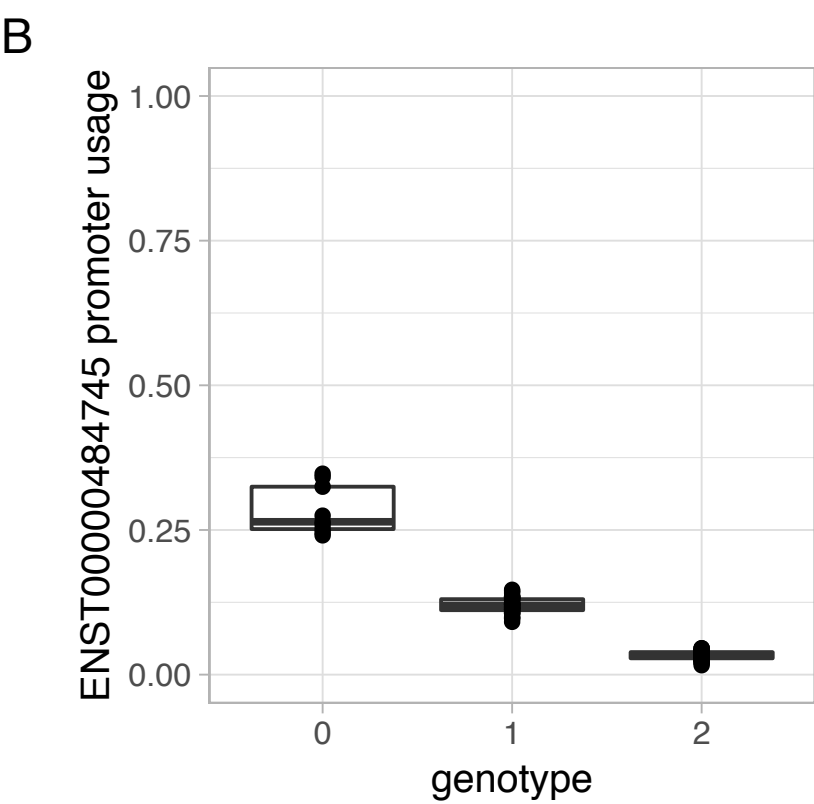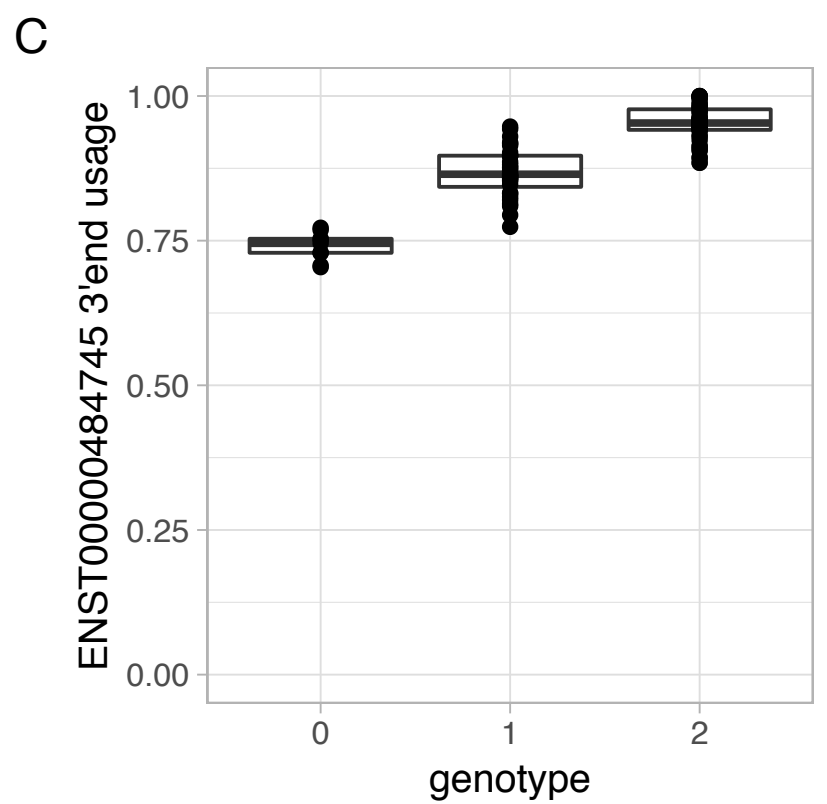

Supplement: supp [file elife-41673-supp-v1.zip]

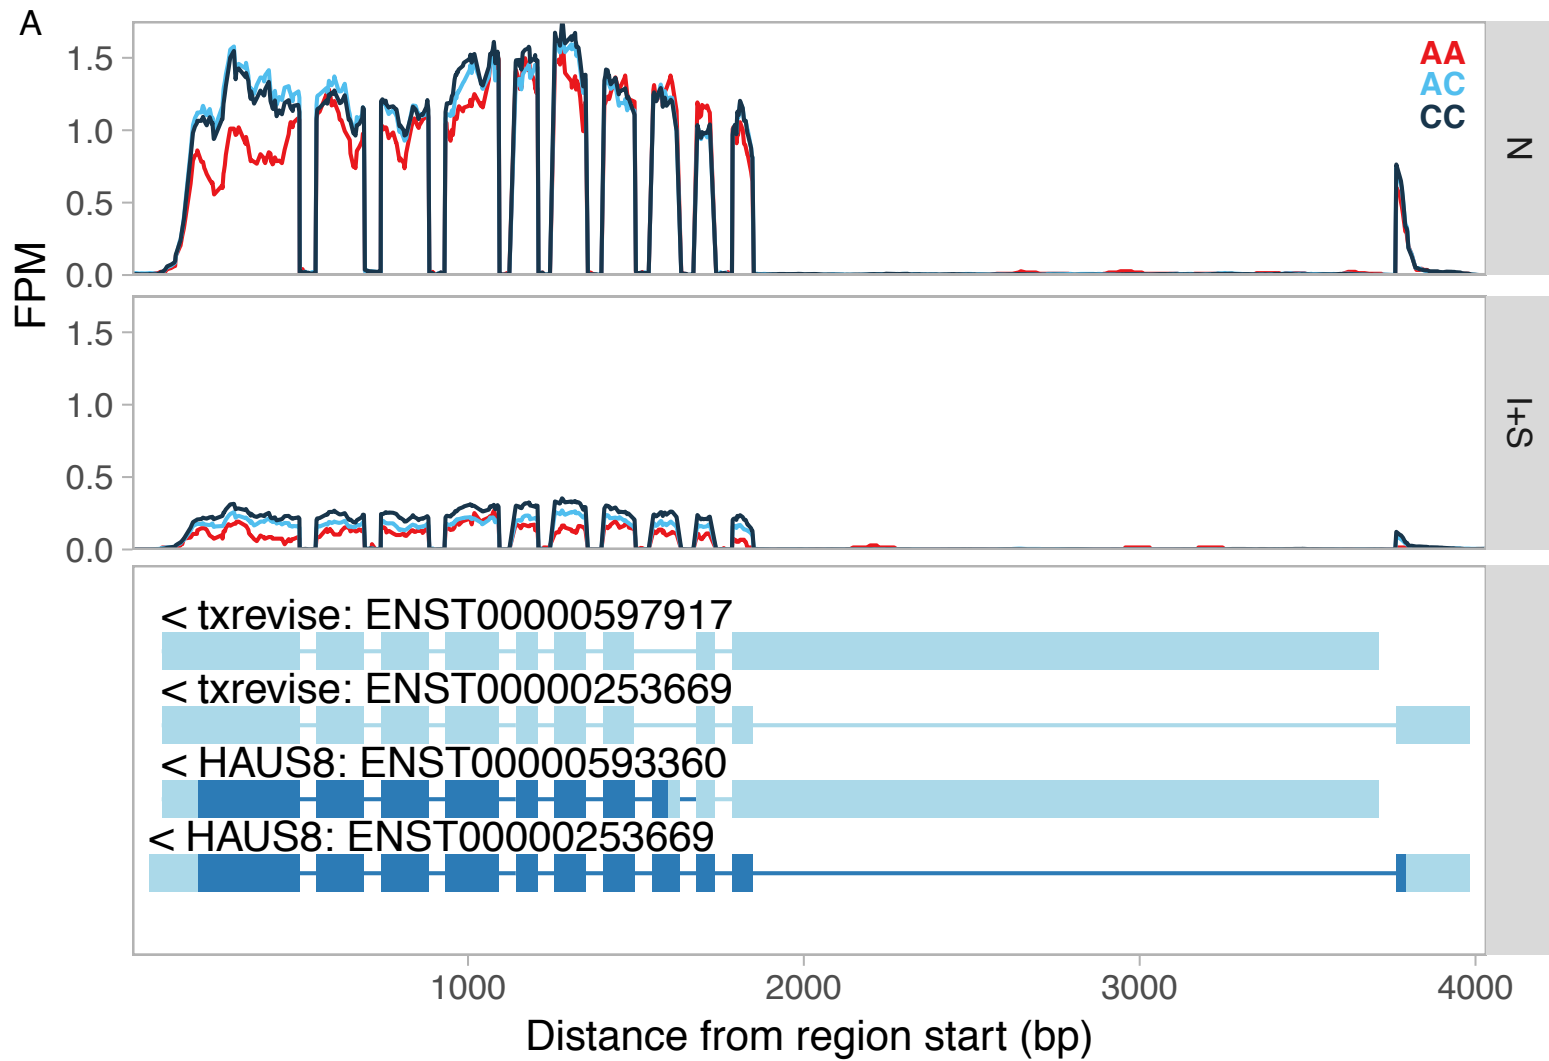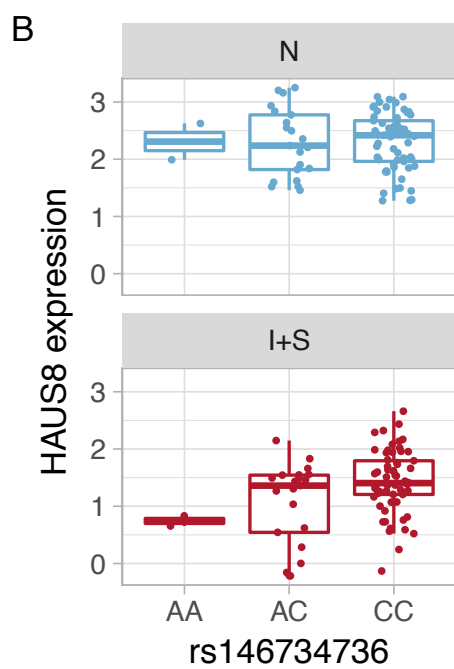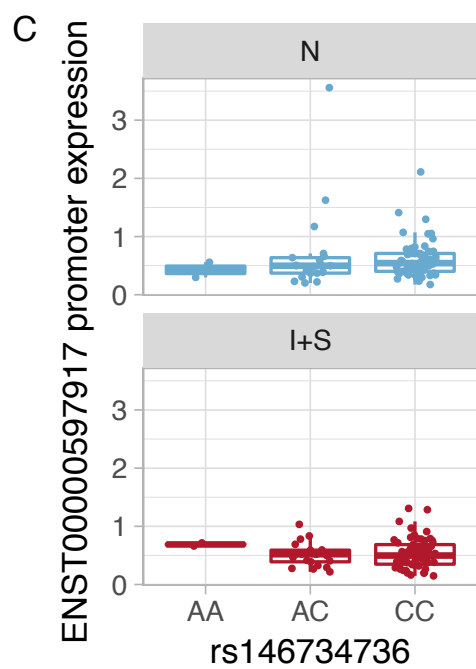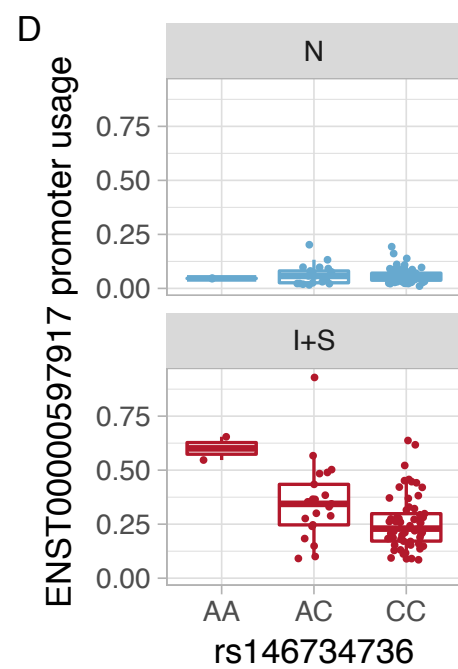

Supplement: supp [file elife-41673-supp-v1.zip]

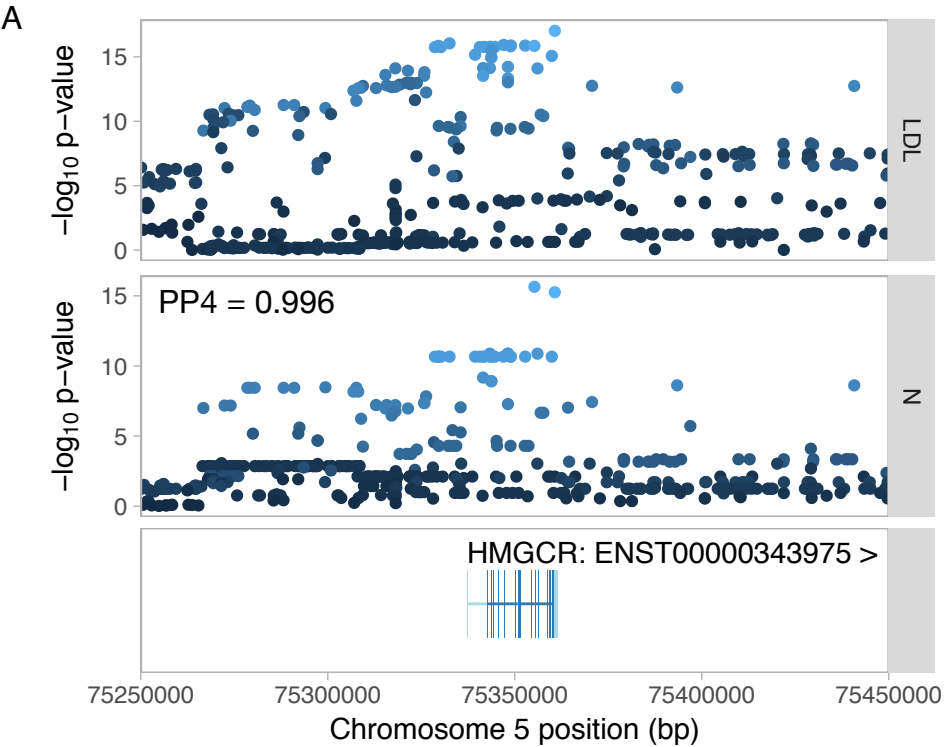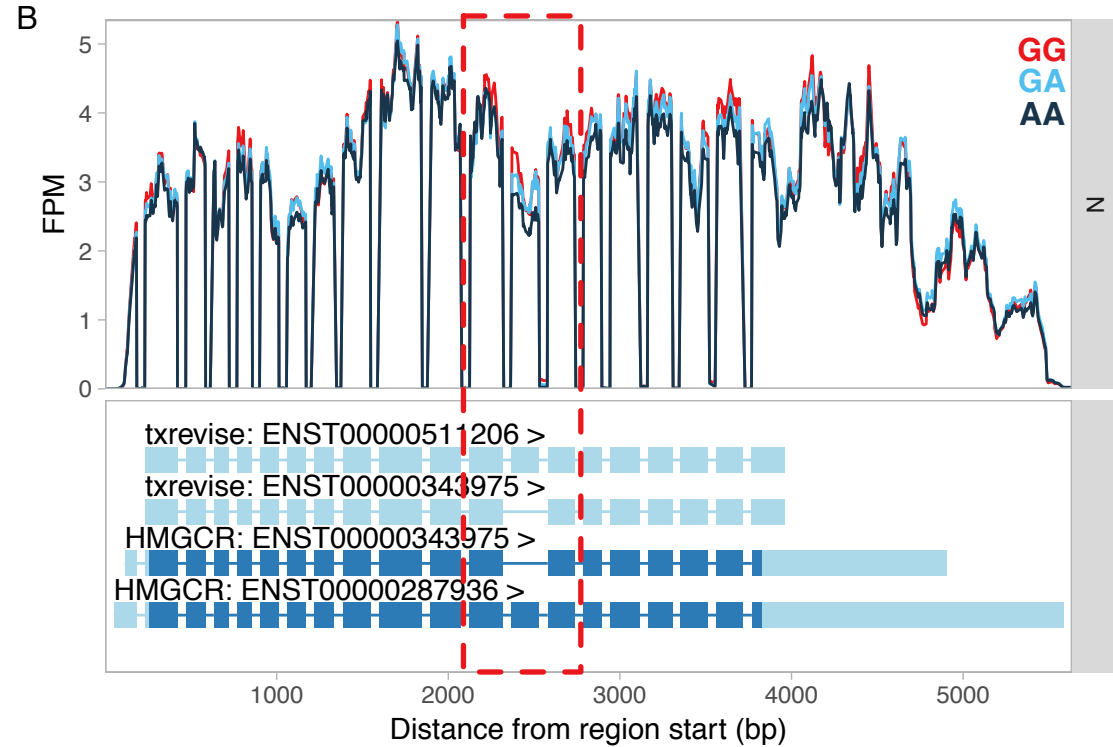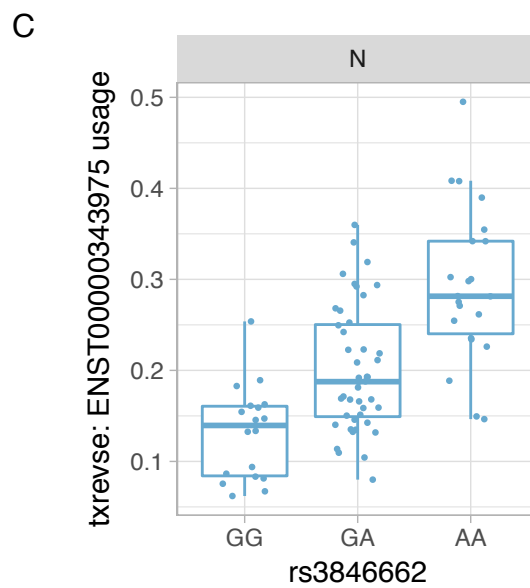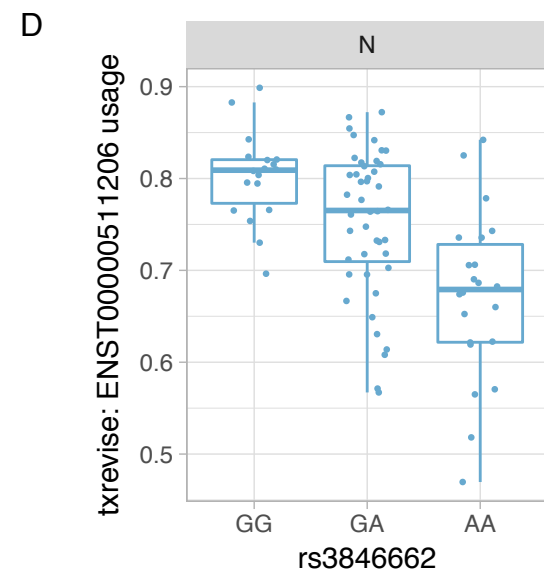

Supplement: supp [file elife-41673-supp-v1.zip]

A

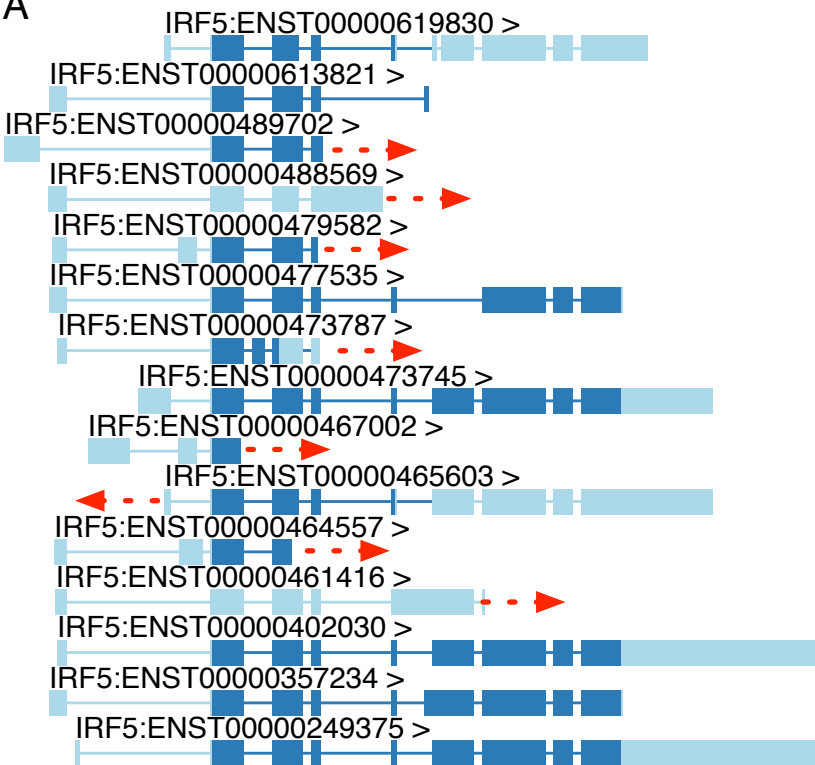

- - ► Transcripts with truncated 5' or 3' ends

B

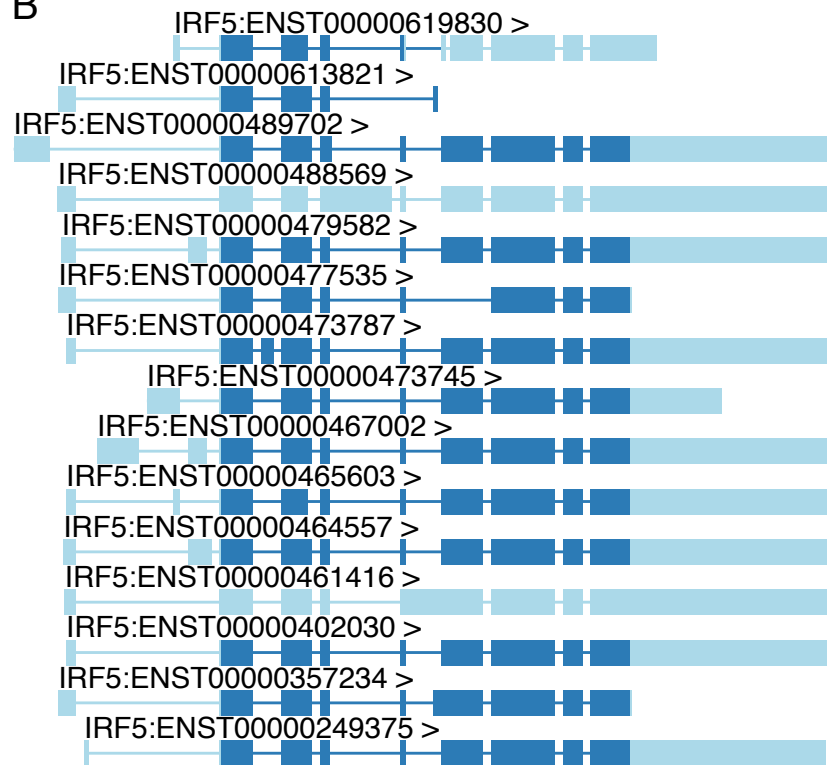

Supplement: supp [file elife-41673-supp-v1.zip]

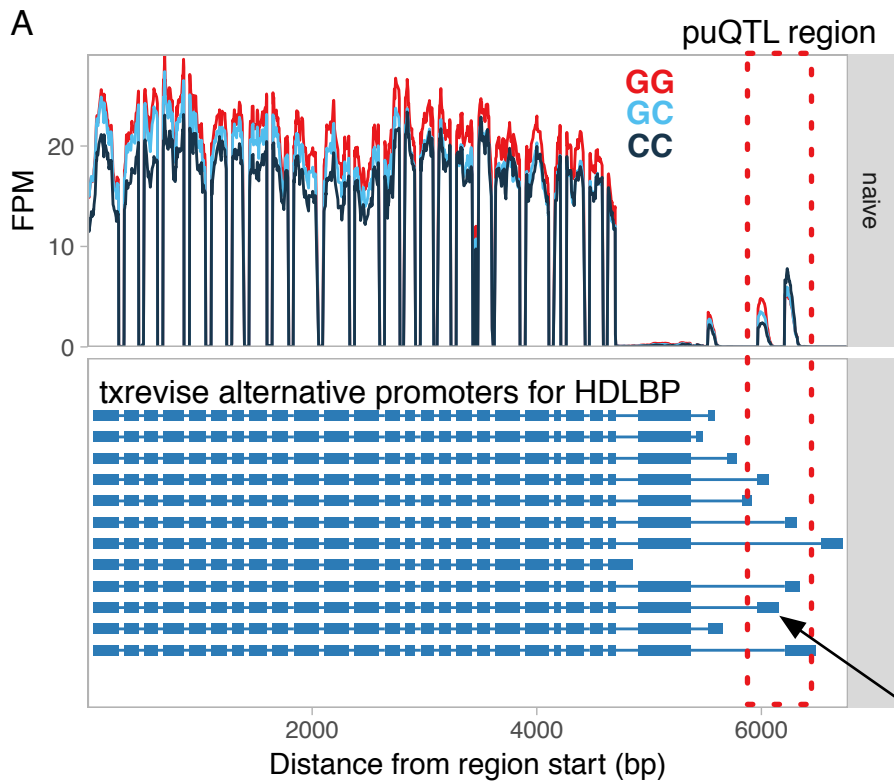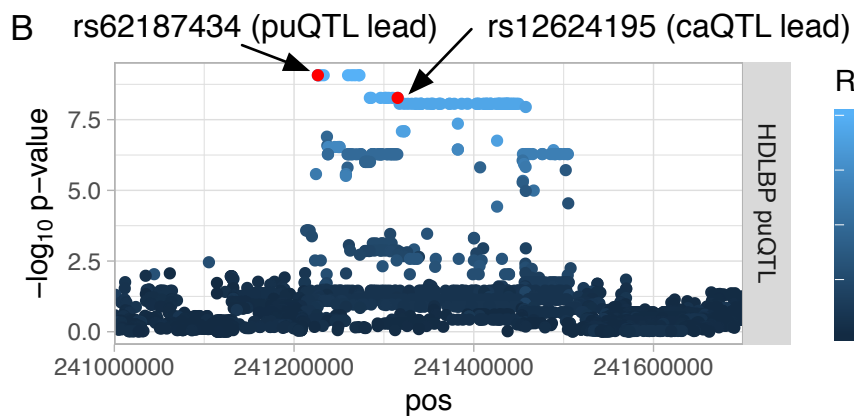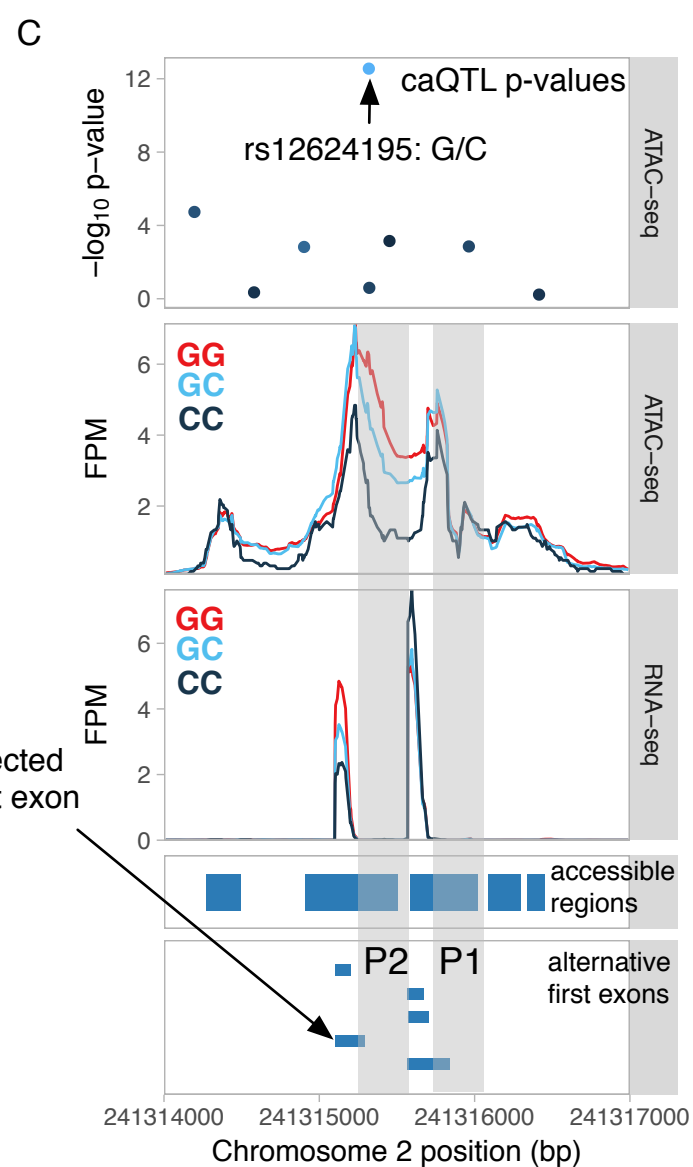

Supplement: supp [file elife-41673-supp-v1.zip]

A

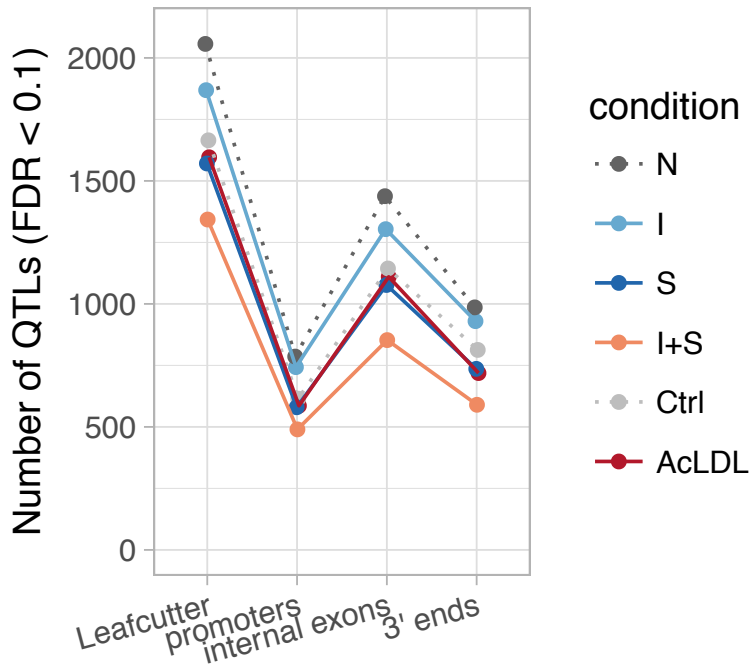

B

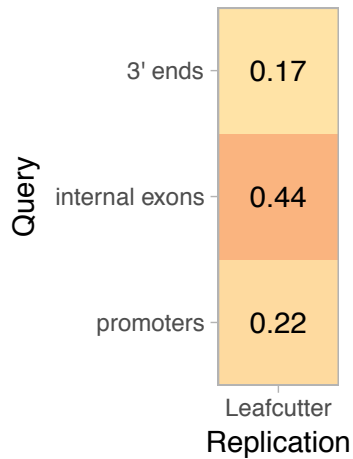

Supplement: supp [file elife-41673-supp-v1.zip]

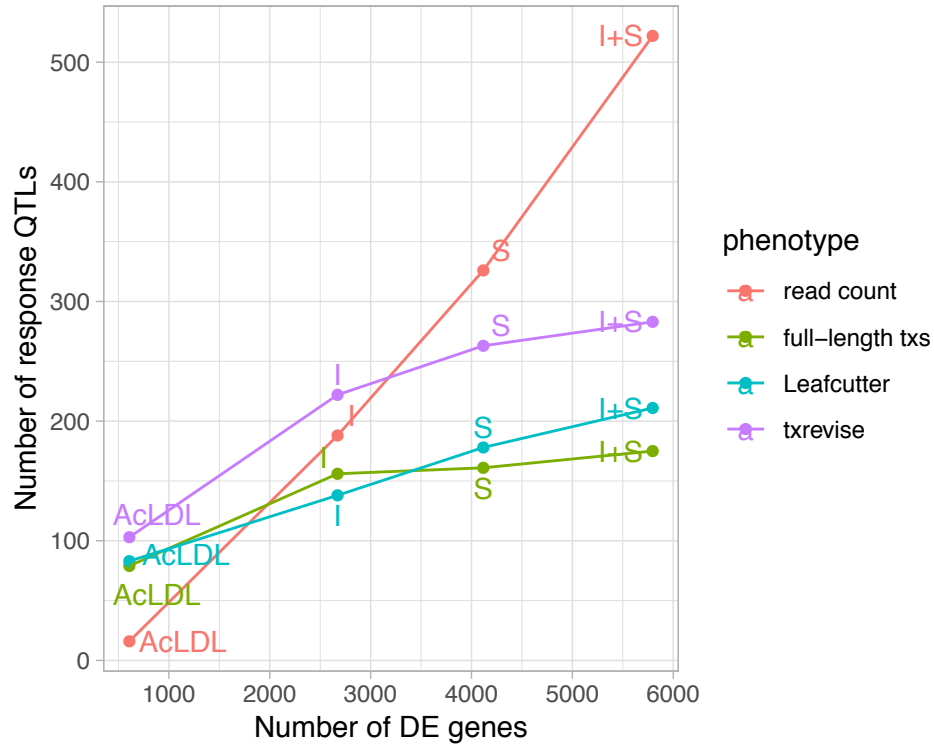

Supplement: supp [file elife-41673-supp-v1.zip]

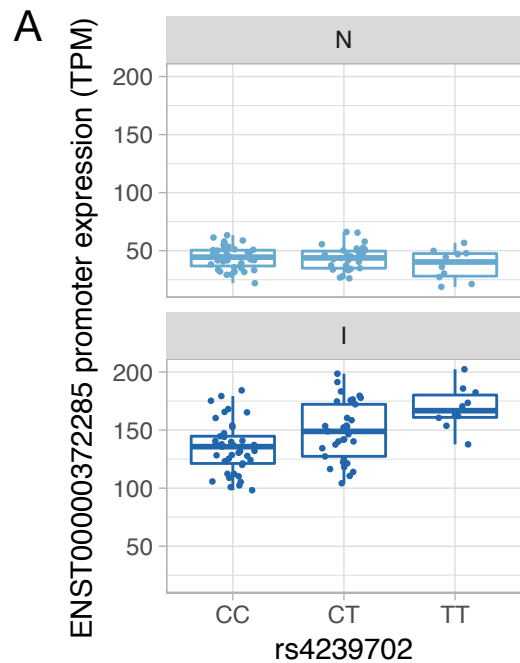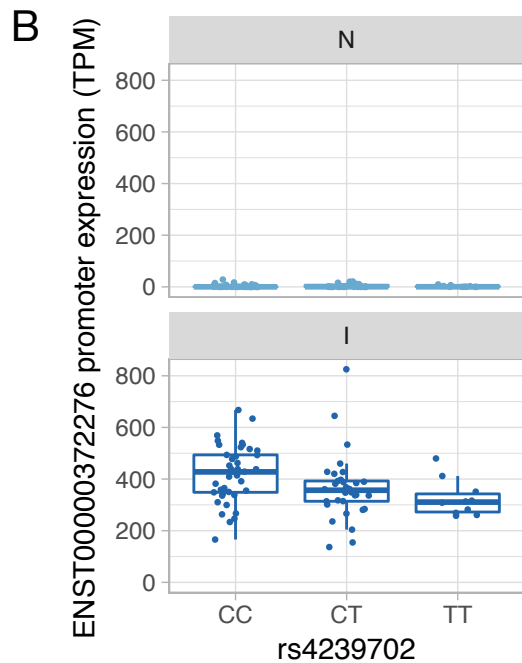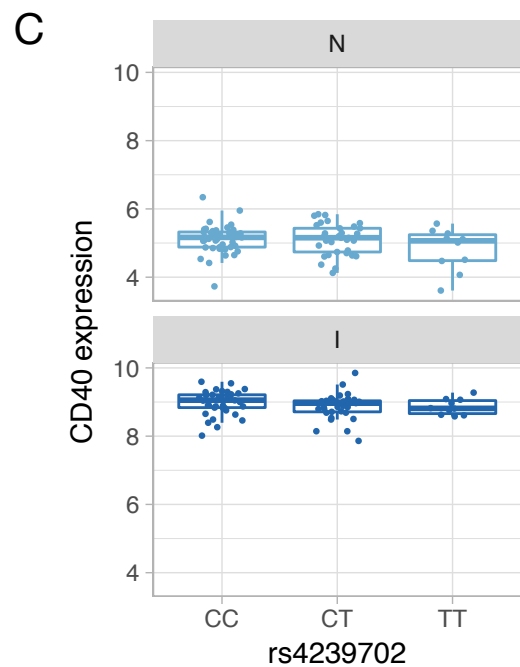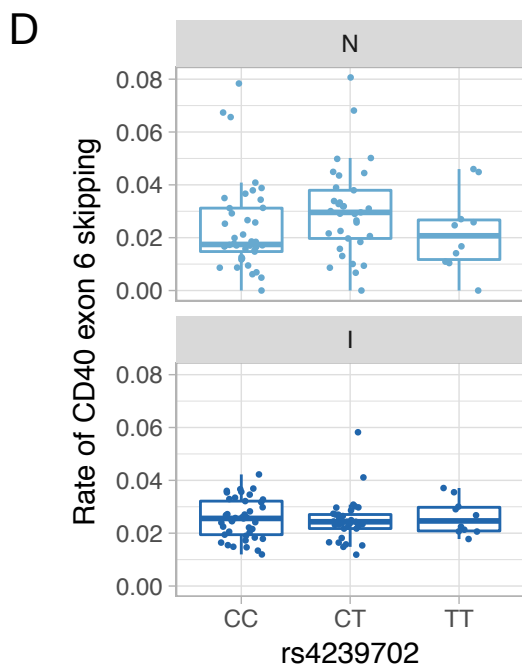

Supplement: supp [file elife-41673-supp-v1.zip]
